# Supplementary material for: Overexpression screen of interferon-stimulated genes identifies RARRES3 as a restrictor of Toxoplasma gondii infection
Source: eLife. 2021 Dec 6;10:e73137. doi: 10.7554/eLife.73137 (PMC8789288; doi:10.7554/eLife.73137)
Supplement: Figure 3—source data 1. [file elife-73137-fig3-data1.xlsx]

## Sheet: Sheet1
Gene symbol	Chromosome	Start	Stop	Strand	Total counts	Maximum counts	Geometric mean	Arithmetic mean	P-value	FDR step up	Ratio	Log2(Ratio)	Fold change	LSMean(+)	LSMean(-)	FC 95% lower limit	FC 95% upper limit
IDO1	8	39902275	39928791	+	1015.67	351.948	1.70991	112.852	4.40274e-08	1.69117e-06	8712.48	13.0889	8712.48	323.491	0.0371295	624.888	121474
GBP4	1	89181144	89198943	-	980.333	333.517	3.91438	108.926	1.06315e-06	2.52778e-05	3194.14	11.6412	3194.14	311.344	0.0974735	211.643	48206.2
OAS2	12	112978395	113011724	+	235.471	59.3137	1.10329	26.1635	3.32933e-07	9.45241e-06	1456.12	10.5079	1456.12	54.2349	0.0372461	102.667	20652.1
APOL3	22	36140330	36166178	-	210.042	52.5974	2.30534	23.338	1.14354e-05	0.000181929	485.355	8.9229	485.355	50.6093	0.104273	31.5724	7461.27
UBD	6	29555515	29559733	-	331.893	119.751	4.46745	36.877	3.32641e-12	4.38166e-10	236.493	7.88566	236.493	107.886	0.456191	130.733	427.813
BST2	19	17402939	17405631	-	132.795	38.4254	3.67956	14.755	3.17293e-13	5.69778e-11	201.69	7.65599	201.69	34.6199	0.171649	125.674	323.685
BATF2	11	64987945	64997019	-	624.498	201.664	13.4369	69.3887	6.64654e-18	7.95702e-15	147.202	7.20165	147.202	197.498	1.34168	119.234	181.73
GBP1	1	89052319	89065231	-	1276.11	409.818	39.0437	141.79	2.97793e-19	7.13016e-16	92.6261	6.53335	92.6261	383.235	4.13744	79.369	108.098
C4B	6	32014795	32035419	+	121.235	47.4263	1.53541	13.4705	8.11573e-09	3.9331e-07	92.4735	6.53097	92.4735	39.6219	0.428468	37.9369	225.41
TNFRSF1B	1	12166991	12209229	+	37.1592	11.0402	1.38164	4.1288	1.32545e-12	1.96304e-10	92.1843	6.52645	92.1843	9.62306	0.104389	59.2308	143.472
ACSL5	10	112374018	112428381	+	64.8038	15.1872	2.52134	7.20042	2.55299e-13	4.76315e-11	86.8655	6.44071	86.8655	14.9003	0.171533	58.6518	128.651
IFIT3	10	89327997	89340972	+	771.032	201.837	30.0242	85.6703	2.26688e-17	1.91565e-14	77.6371	6.27867	77.6371	201.289	2.59269	63.5337	94.8712
HAPLN3	15	88877294	88895598	-	437.198	155.184	6.34982	48.5776	3.49063e-14	8.49939e-12	74.7779	6.22454	74.7779	142.834	1.91011	53.786	103.963
TNFRSF14	1	2555639	2565383	+	44.0515	12.1245	1.76418	4.89462	1.18519e-11	1.30972e-09	74.1923	6.2132	74.1923	10.5008	0.141535	45.0211	122.265
SOCS1	16	11254408	11256205	-	188.211	60.3605	4.83582	20.9124	5.7207e-12	7.1464e-10	71.8403	6.16672	71.8403	59.2969	0.825398	44.6187	115.67
CMPK2	2	6840570	6866636	-	150.666	33.485	6.19644	16.7406	1.29686e-13	2.7001e-11	71.2198	6.15421	71.2198	33.013	0.463536	49.6515	102.157
CD74	5	150400041	150412930	-	98.1458	19.9128	3.50348	10.9051	2.21166e-10	1.7554e-08	69.9402	6.12805	69.9402	15.1898	0.217182	37.0623	131.984
TRIM22	11	5689697	5737090	+	351.885	91.9359	15.1381	39.0984	6.7367e-16	3.12192e-13	61.9093	5.95208	61.9093	85.9275	1.38796	48.7056	78.6923
IFI44	1	78649796	78664079	+	82.3492	16.7258	3.24397	9.14991	2.98479e-12	3.97032e-10	59.2527	5.88881	59.2527	11.955	0.201763	38.5895	90.9803
C4A	6	31982057	32002682	+	88.4678	33.5921	1.53599	9.82975	0.000131126	0.00133978	53.9178	5.75269	53.9178	28.1281	0.521686	10.171	285.825
PLAAT4	11	63536808	63546463	+	321.79	73.6188	14.7852	35.7544	3.17065e-13	5.69778e-11	49.396	5.62632	49.396	66.8457	1.35326	34.7317	70.2518
MX1	21	41420304	41459215	+	331.597	92.4829	12.2762	36.8441	2.08983e-16	1.07223e-13	47.7852	5.57849	47.7852	34.5531	0.723093	38.8736	58.7397
IRF1	5	132481609	132490778	-	3612.4	995.376	160.878	401.378	2.78387e-22	3.99931e-18	46.7373	5.5465	46.7373	980.304	20.9748	43.0836	50.7007
PSMB9	6	32844136	32859852	+	551.775	145.695	26.5297	61.3083	7.71647e-19	1.38568e-15	41.2724	5.36711	41.2724	142.127	3.44363	36.0484	47.2535
APOL1	22	36253071	36267531	+	1978.97	497.714	97.1923	219.885	4.87296e-18	6.36408e-15	40.3441	5.33429	40.3441	492.472	12.2068	34.6166	47.0193
UBA7	3	49805209	49813954	-	173.522	36.7786	8.10486	19.2802	4.31011e-09	2.27644e-07	36.9505	5.20752	36.9505	33.0316	0.893943	18.763	72.7675
PARP10	8	143977153	144012773	-	560.247	126.215	28.9806	62.2496	1.00923e-15	4.26428e-13	35.8446	5.16368	35.8446	111.574	3.1127	28.9422	44.3932
ICAM1	19	10271093	10286616	+	56.0243	20.1215	1.16814	6.22492	2.65951e-09	1.56584e-07	35.3934	5.14541	35.3934	17.9698	0.507715	19.2946	64.9246
EXOC3L1	16	67184379	67190186	-	36.5347	10.2927	1.7992	4.05941	3.62721e-11	3.49722e-09	34.8112	5.12148	34.8112	9.60576	0.275939	22.4226	54.0446
APOL6	22	35648446	35668405	+	1777.62	499.474	86.2788	197.514	1.13412e-20	8.14638e-17	30.5742	4.93424	30.5742	496.417	16.2365	27.8521	33.5622
IL18BP	11	71998613	72005716	+	673.091	216.663	25.8312	74.7878	2.23071e-17	1.91565e-14	28.9804	4.85701	28.9804	205.317	7.08466	24.8367	33.8155
TRIM31	6	30102897	30113091	-	293.377	90.0253	15.0181	32.5974	8.61968e-15	2.42805e-12	27.4324	4.77781	27.4324	79.9633	2.91492	21.8302	34.4724
CD274	9	5450503	5470567	+	67.378	21.7745	2.51639	7.48645	3.19573e-11	3.1662e-09	27.3798	4.77504	27.3798	20.629	0.75344	18.2137	41.1586
UBE2L6	11	57551656	57568285	-	1410.69	386.756	75.6866	156.743	1.18948e-19	3.41761e-16	26.3053	4.71728	26.3053	374.227	14.2263	23.6907	29.2084
SAMD9L	7	93130056	93148386	-	432.119	120.033	24.0371	48.0133	1.59315e-16	8.47674e-14	26.0191	4.7015	26.0191	109.067	4.19181	21.9285	30.8727
NLRC5	16	56989485	57083532	+	816.333	243.273	40.3808	90.7037	3.77425e-15	1.20491e-12	23.1057	4.53018	23.1057	233.309	10.0975	18.8069	28.3871
LAMP3	3	183122215	183163840	-	22.6922	7.15262	1.22959	2.52135	4.0124e-08	1.56212e-06	23.0967	4.52961	23.0967	5.67234	0.245592	11.7255	45.4954
IRF8	16	85899162	85922607	+	47.2593	18.4299	1.69969	5.25104	3.63594e-09	1.98552e-07	21.8884	4.45209	21.8884	14.5167	0.663215	12.7494	37.5783
ISG20	15	88636153	88656484	+	247.795	73.9674	14.5409	27.5328	1.57627e-14	3.97275e-12	20.9638	4.38983	20.9638	62.9526	3.00293	16.839	26.0989
PARP14	3	122680839	122730841	+	3161.44	865.753	179.555	351.271	1.54437e-18	2.34413e-15	20.8588	4.38258	20.8588	841.781	40.3562	18.5748	23.4236
PARP9	3	122527924	122564578	-	856.452	218.841	52.1839	95.1613	1.46149e-17	1.39972e-14	19.5816	4.29143	19.5816	212.463	10.8501	17.1541	22.3527
PSMB8-AS1	6	32844078	32846501	+	91.0819	24.2723	5.32336	10.1202	6.63988e-12	7.88335e-10	19.2603	4.26756	19.2603	23.6987	1.23044	13.8562	26.7719
CIITA	16	10866222	10943022	+	72.2875	23.6238	3.71853	8.03194	6.53975e-11	6.02243e-09	18.3222	4.19552	18.3222	20.6179	1.12529	12.5489	26.7516
WARS1	14	100333790	100376806	-	9609.13	3037.98	429.656	1067.68	3.19081e-20	1.14598e-16	18.207	4.18642	18.207	2869.58	157.609	16.7257	19.8196
TAP1	6	32845209	32853979	-	3862.63	1127.46	205.772	429.181	1.81922e-20	8.71164e-17	18.1139	4.17903	18.1139	1095.25	60.4644	16.695	19.6535
NNMT	11	114257787	114313286	+	231.419	79.5062	9.91375	25.7133	2.45454e-11	2.53683e-09	18.0828	4.17654	18.0828	69.3683	3.83616	12.7418	25.6625
PLEKHA4	19	48837097	48868618	-	44.4361	9.94384	2.72002	4.93734	4.78369e-10	3.47083e-08	17.5518	4.13355	17.5518	7.32156	0.417141	11.4744	26.848
IFI27	14	94104836	94116699	+	231.787	79.8024	4.55204	25.7541	1.98386e-08	8.53296e-07	17.0403	4.09087	17.0403	5.21123	0.305819	9.54164	30.4319
GBP2	1	89106132	89150457	-	388.99	128.724	16.1391	43.2211	1.49894e-15	5.81995e-13	16.933	4.08177	16.933	117.519	6.94024	14.245	20.1282
IFIH1	2	162267074	162318685	-	329.3	73.0084	21.8277	36.5889	1.52847e-16	8.4454e-14	16.591	4.05233	16.591	66.5562	4.01159	14.328	19.2114
ISG15	1	1001138	1014541	+	491.605	85.2682	31.3533	54.6228	8.77682e-18	9.00627e-15	16.5181	4.04597	16.5181	80.887	4.89688	14.6444	18.6315
PLA1A	3	119597875	119629812	+	23.0622	5.4081	1.45155	2.56247	9.14655e-08	3.14353e-06	16.0551	4.00496	16.0551	4.42647	0.275705	8.46861	30.4377
OASL	12	121019111	121039243	-	80.5036	15.4139	5.15427	8.94485	7.8247e-13	1.20871e-10	15.9372	3.99433	15.9372	13.076	0.820466	12.2747	20.6926
IFI35	17	43006740	43014457	+	998.675	274.587	63.5455	110.964	6.92257e-17	4.52044e-14	15.2591	3.93159	15.2591	255.649	16.7539	13.3316	17.4652
IRF1-AS1	5	132410636	132488703	+	87.0062	20.6534	5.94263	9.66736	2.6082e-13	4.80377e-11	14.4986	3.85784	14.4986	19.8511	1.36917	11.4766	18.3163
TCAF2	7	143620952	143730410	+	27.4346	8.93476	1.20658	3.04829	1.67981e-06	3.64535e-05	13.87	3.79389	13.87	8.07819	0.582423	6.47584	29.7067
IFITM3	11	319676	327538	-	299.732	63.984	20.981	33.3036	4.85085e-13	8.29612e-11	13.3838	3.74242	13.3838	60.8627	4.54748	10.5376	16.9989
IFIT2	10	89283694	89309272	+	90.8947	19.8004	6.43464	10.0994	2.27894e-13	4.3078e-11	13.2616	3.72919	13.2616	18.287	1.37894	10.6079	16.5792
GBP3	1	89006679	89022895	-	380.707	104.846	25.2369	42.3007	6.07811e-15	1.85783e-12	12.9161	3.6911	12.9161	97.013	7.511	10.8714	15.3453
TNFSF10	3	172505508	172523476	-	42.234	12.8085	2.83949	4.69267	3.42472e-09	1.90696e-07	12.6982	3.66656	12.6982	10.3321	0.813667	8.22137	19.6129
DDX60	4	168216294	168318805	-	259.046	60.2731	18.6486	28.7829	2.23061e-15	7.93675e-13	12.2969	3.62022	12.2969	56.9382	4.63029	10.5038	14.3961
DTX3L	3	122564338	122575204	+	1866.61	449.259	133.586	207.401	4.01893e-19	8.248e-16	11.9407	3.57782	11.9407	435.013	36.4311	10.954	13.0162
IRF9	14	24161265	24166566	+	498.034	99.3428	36.152	55.3371	3.13626e-14	7.76819e-12	11.7953	3.56014	11.7953	95.3508	8.08378	9.78015	14.2257
IL15RA	10	5943639	5978188	-	176.446	43.2641	12.8024	19.6051	1.37705e-14	3.59685e-12	11.5647	3.53165	11.5647	40.2608	3.48136	9.71245	13.7701
FLT3LG	19	49474207	49486232	+	48.3088	10.6351	3.47613	5.36764	2.49468e-09	1.49327e-07	11.4813	3.52121	11.4813	10.3622	0.902532	7.53372	17.4974
IFIT1	10	89392546	89406488	+	227.868	63.1859	12.6102	25.3186	2.68882e-12	3.71021e-10	11.3792	3.50833	11.3792	21.0956	1.85388	8.84906	14.6327
PSMB8	6	32840717	32844680	-	833.694	179.792	61.7086	92.6327	3.77863e-17	2.71419e-14	11.3547	3.50521	11.3547	173.287	15.2613	10.1177	12.7429
IFI16	1	158999968	159055156	+	84.0618	15.4918	6.0203	9.3402	2.73394e-11	2.74656e-09	11.3277	3.50178	11.3277	14.3579	1.2675	8.43603	15.2106
LAP3	4	17577192	17607973	+	1562.54	417.294	106.332	173.616	1.63172e-18	2.34413e-15	11.0327	3.46371	11.0327	402.162	36.452	10.0642	12.0943
RASGRP3	2	33436324	33564751	+	92.1957	27.9957	5.57194	10.244	1.15714e-07	3.81271e-06	10.9097	3.44754	10.9097	24.6404	2.25857	6.11022	19.4792
TAP2	6	32821833	32838771	-	1510.14	365.082	108.47	167.793	2.83922e-15	9.48565e-13	10.8926	3.44528	10.8926	362.92	33.3179	9.34679	12.6942
CD38	4	15778275	15853233	+	119.157	36.7221	8.50571	13.2396	9.65514e-11	8.56208e-09	10.7996	3.4329	10.7996	28.3796	2.62785	7.87809	14.8045
SAMHD1	20	36890229	36951844	-	897.244	221.402	64.6695	99.6938	4.64884e-16	2.22618e-13	10.5468	3.39873	10.5468	217.69	20.6404	9.23342	12.047
APOL2	22	36226209	36239955	-	1599.18	408.125	116.043	177.687	4.47493e-17	3.06128e-14	10.0967	3.33581	10.0967	390.125	38.6388	9.03591	11.2821
PIK3AP1	10	96593315	96720515	-	156.001	42.7254	11.3526	17.3335	2.00719e-10	1.61091e-08	9.84505	3.2994	9.84505	37.157	3.77418	7.14701	13.5616
C1R	12	7080214	7092541	-	905.867	261.659	61.7429	100.652	6.78941e-14	1.45577e-11	9.67375	3.27407	9.67375	235.766	24.3718	8.06994	11.5963
TLR3	4	186069155	186088074	+	166.173	35.9371	12.8339	18.4636	2.02279e-13	3.92695e-11	9.63866	3.26883	9.63866	32.677	3.3902	7.93677	11.7055
CTSS	1	150730188	150765793	-	478.188	123.327	34.4132	53.132	2.86122e-16	1.41739e-13	9.57371	3.25908	9.57371	119.446	12.4764	8.46259	10.8307
PRRG4	11	32829927	32858121	+	55.8019	13.8149	4.23896	6.20021	3.26714e-11	3.21478e-09	9.53911	3.25385	9.53911	12.7336	1.33488	7.2359	12.5754
IFI6	1	27666064	27672199	-	820.267	244.544	39.663	91.1408	3.29621e-15	1.07621e-12	9.12672	3.1901	9.12672	51.5648	5.64987	7.91539	10.5234
SEMA3F	3	50155045	50189076	+	181.407	53.2466	11.6548	20.1563	6.20658e-13	9.9373e-11	9.01063	3.17163	9.01063	49.0032	5.43838	7.34425	11.0551
IGFLR1	19	35738801	35742454	-	273.783	75.3241	18.7664	30.4204	6.08602e-14	1.3451e-11	8.97697	3.16623	8.97697	71.5669	7.97228	7.5459	10.6794
CEACAM1	19	42507304	42561235	-	247.734	62.1419	18.9878	27.526	1.42533e-10	1.20448e-08	8.70567	3.12196	8.70567	56.1189	6.44625	6.45144	11.7476
PSMB10	16	67934506	67936865	-	842.227	193.555	66.4097	93.5808	8.56021e-17	5.124e-14	8.62279	3.10815	8.62279	185.547	21.5182	7.738	9.60874
HELZ2	20	63558086	63574240	-	1393.52	253.565	109.167	154.835	2.67052e-17	2.01919e-14	8.61106	3.10619	8.61106	237.455	27.5755	7.79362	9.51425
AC099548.2	7	143761790	143836934	-	39.9691	11.8603	2.60481	4.44102	3.67308e-08	1.4617e-06	8.60264	3.10478	8.60264	10.6384	1.23665	5.51644	13.4154
PRRT2	16	29811382	29815893	+	31.6992	9.80349	1.97049	3.52213	9.85066e-06	0.000160084	8.54988	3.0959	8.54988	8.30302	0.971127	3.90786	18.706
IFI30	19	18173162	18178118	+	554.451	137.287	42.2563	61.6057	2.18661e-15	7.93675e-13	8.52324	3.0914	8.52324	132.228	15.5138	7.4495	9.75174
HLA-E	6	30489509	30494195	+	2197.04	593.231	156.163	244.116	7.60021e-18	8.39881e-15	8.09369	3.0168	8.09369	565.914	69.9203	7.40473	8.84676
RNF213-AS1	17	80351828	80415169	-	48.4823	13.318	3.68925	5.38692	2.30806e-09	1.40498e-07	8.06905	3.0124	8.06905	11.5744	1.43442	5.66968	11.4838
CAND2	3	12796472	12871917	+	65.265	17.4918	4.3717	7.25166	2.92296e-09	1.67736e-07	7.92189	2.98585	7.92189	17.2182	2.17349	5.54017	11.3275
RNF213	17	80260866	80398787	+	11559.1	2898.27	864.206	1284.35	8.27999e-17	5.124e-14	7.91721	2.98499	7.91721	2865.16	361.89	7.13773	8.78181
HLA-B	6	31269491	31357189	-	1164.17	237.188	84.0163	129.353	1.18815e-16	6.82761e-14	7.71688	2.94802	7.71688	142.142	18.4197	6.94785	8.57103
BTN3A3	6	26440472	26453416	+	86.3971	20.8458	6.74512	9.59968	4.79353e-08	1.81699e-06	7.7047	2.94574	7.7047	18.9293	2.45686	4.91539	12.0769
STAT2	12	56341597	56360168	-	528.052	137.033	39.8847	58.6725	2.95229e-12	3.96379e-10	7.6431	2.93416	7.6431	129.206	16.9049	6.18601	9.4434
SP110	2	230167293	230225730	-	340.998	78.9282	27.491	37.8887	7.25431e-16	3.25673e-13	7.53873	2.91432	7.53873	76.9581	10.2084	6.70303	8.47862
NMI	2	151270470	151289895	-	266.407	60.8095	21.5222	29.6008	4.77961e-14	1.12564e-11	7.52844	2.91235	7.52844	59.5261	7.90683	6.43411	8.8089
HCP5	6	31463170	31478937	+	22.9747	5.38023	1.6357	2.55275	1.36152e-06	3.06577e-05	7.16377	2.84072	7.16377	2.82379	0.394176	4.06604	12.6215
HLA-F	6	29722775	29738529	+	170.161	33.8775	14.1551	18.9068	1.25758e-12	1.88191e-10	7.14778	2.8375	7.14778	30.9673	4.33244	5.90119	8.65771
C3	19	6677704	6730563	-	482.793	137.965	33.5485	53.6436	5.47295e-13	9.0373e-11	7.03724	2.81501	7.03724	125.983	17.9023	5.88163	8.4199
TRIM21	11	4384897	4393703	-	447.128	103.014	36.8811	49.6809	4.10331e-14	9.82469e-12	6.8917	2.78486	6.8917	99.0874	14.3778	5.93832	7.99815
ASPHD2	22	26429260	26445016	+	66.0172	16.3226	5.35164	7.33525	2.29546e-09	1.40326e-07	6.84462	2.77497	6.84462	14.878	2.17368	4.95244	9.45975
IRF7	11	612553	615984	-	209.633	42.1969	16.7268	23.2925	9.95412e-13	1.50527e-10	6.71591	2.74758	6.71591	29.9777	4.46368	5.59569	8.06039
ERAP2	5	96875986	96919704	+	74.2781	16.2241	6.21878	8.25312	3.18328e-09	1.80044e-07	6.71004	2.74632	6.71004	14.3847	2.14375	4.82093	9.33943
MMP25-AS1	16	3037400	3059371	-	230.441	63.1308	15.9882	25.6046	3.91839e-13	6.86484e-11	6.62971	2.72895	6.62971	60.1906	9.07891	5.59243	7.85939
RARRES1	3	158696892	158732490	-	79.3535	24.3815	5.30855	8.81706	3.50122e-07	9.82392e-06	6.60937	2.72451	6.60937	20.6761	3.1283	4.09543	10.6665
CD40	20	46118278	46129864	+	108.477	24.1617	9.21414	12.053	6.38585e-12	7.6567e-10	6.55806	2.71327	6.55806	22.4783	3.42758	5.34077	8.05279
AC116347.1	5	98213402	98214122	+	62.9741	13.2346	5.30865	6.99713	1.0279e-08	4.82577e-07	6.48594	2.69732	6.48594	12.2102	1.88256	4.54464	9.25649
TAPBPL	12	6451690	6466518	+	189.988	36.6349	16.1545	21.1098	1.78948e-13	3.62079e-11	6.45951	2.69142	6.45951	32.8282	5.08215	5.51262	7.56905
ODF3B	22	50529710	50532581	-	61.2155	14.9123	5.16238	6.80172	3.82417e-10	2.86136e-08	6.37189	2.67172	6.37189	13.2339	2.07692	4.8608	8.35275
CRYBG1	6	106360717	106572018	+	34.9978	8.72268	2.95285	3.88864	8.71453e-08	3.0167e-06	6.36709	2.67064	6.36709	7.02505	1.10334	4.25055	9.53757
TGM2	20	38127385	38166579	-	10348.5	2644.68	779.114	1149.84	4.19215e-15	1.30923e-12	6.34724	2.66613	6.34724	2590.11	408.069	5.62085	7.1675
CTSO	4	155924118	155953867	-	46.5935	12.6478	3.78391	5.17705	4.82151e-08	1.82e-06	6.3224	2.66047	6.3224	10.6059	1.67751	4.28896	9.31992
TYMP	22	50525752	50530033	-	650.925	153.955	54.0481	72.325	2.21049e-15	7.93675e-13	6.31811	2.65949	6.31811	147.582	23.3586	5.62758	7.09337
SOCS3	17	78356778	78360078	-	260.805	81.0199	18.6292	28.9783	7.59924e-11	6.90953e-09	6.18613	2.62904	6.18613	66.8756	10.8106	4.87959	7.84251
SEPTIN4	17	58520250	58544369	-	17.2234	4.7103	1.38501	1.91371	4.89626e-06	8.69465e-05	6.13269	2.61652	6.13269	3.92431	0.639901	3.48459	10.7932
CFB	6	31945650	31952085	+	152.383	33.9008	13.1046	16.9315	4.02682e-10	2.98193e-08	6.06774	2.60116	6.06774	30.5137	5.02884	4.65893	7.90255
MUC1	1	155185824	155192917	-	77.9837	21.7193	6.24862	8.66485	1.44528e-10	1.2142e-08	5.95014	2.57292	5.95014	18.6299	3.131	4.6726	7.57699
RAB20	13	110523066	110561723	-	110.579	26.6912	9.23417	12.2865	3.13314e-10	2.40699e-08	5.94959	2.57279	5.94959	24.8547	4.17754	4.58527	7.71986
BTN3A1	6	26402237	26415209	+	190.978	46.5086	16.5319	21.2198	5.85224e-12	7.18575e-10	5.86397	2.55188	5.86397	40.0435	6.82873	4.83977	7.10491
PSME2P2	13	48771128	48771828	+	225.438	51.1024	19.8183	25.0487	2.72592e-11	2.74656e-09	5.70727	2.5128	5.70727	43.3214	7.59055	4.62125	7.04852
MMP25	16	3046561	3060727	+	13.5452	4.66259	1.00086	1.50503	4.50599e-05	0.000557563	5.6807	2.50607	5.6807	3.33204	0.586555	2.91756	11.0607
JAK2	9	4984390	5129949	+	157.705	39.5135	12.8835	17.5228	4.95499e-13	8.37451e-11	5.54624	2.47151	5.54624	37.301	6.72545	4.74306	6.48544
PHACTR1	6	12716805	13290485	+	17.1129	3.56816	1.51238	1.90143	8.4058e-07	2.07132e-05	5.50864	2.4617	5.50864	3.14408	0.570754	3.5082	8.64976
AL139011.2	1	160216800	160285131	-	25.6442	9.76572	1.93363	2.84936	0.0048749	0.0239265	5.47366	2.4525	5.47366	5.28279	0.965131	2.20155	13.609
PML	15	73994673	74047828	+	1004.4	214.335	88.2067	111.599	2.26512e-15	7.93675e-13	5.47043	2.45165	5.47043	212.286	38.8061	4.91516	6.08842
STAT1	2	190908460	191020961	-	7341.41	1744.22	624.687	815.712	1.2137e-14	3.22889e-12	5.42725	2.44022	5.42725	1655.25	304.989	4.81541	6.11683
C1S	12	6988259	7071033	+	876.67	245.54	66.9288	97.4078	7.03076e-10	4.83272e-08	5.39002	2.43029	5.39002	215.824	40.0414	4.15836	6.98648
PLSCR1	3	146515180	146544857	-	520.673	104.409	46.8854	57.8526	1.14667e-14	3.10813e-12	5.27564	2.39935	5.27564	99.5913	18.8776	4.69342	5.93009
CASP4	11	104942866	104969367	-	74.9533	20.5851	6.43345	8.32814	9.66802e-09	4.59903e-07	5.15601	2.36625	5.15601	16.5482	3.20949	3.8012	6.99369
SP140L	2	230327184	230403733	+	174.494	34.5361	15.8258	19.3882	4.66033e-13	8.0663e-11	5.073	2.34284	5.073	34.0939	6.72066	4.37564	5.8815
PARP12	7	140023749	140062952	-	596.016	113.172	54.3332	66.224	5.77894e-14	1.29719e-11	4.98893	2.31873	4.98893	109.284	21.9053	4.39647	5.66122
IFIT5	10	89414568	89420998	+	346.204	68.1992	31.5807	38.4671	3.67868e-13	6.52443e-11	4.96555	2.31195	4.96555	64.6318	13.016	4.30036	5.73364
TRIM69	15	44728988	44767830	+	205.464	46.6659	17.9844	22.8294	2.25186e-11	2.34421e-09	4.96189	2.31089	4.96189	44.8658	9.04208	4.09701	6.00935
ACY3	11	67642555	67650731	-	110.558	21.3704	9.94995	12.2842	1.34469e-09	8.51004e-08	4.94475	2.3059	4.94475	18.7099	3.78378	3.81489	6.40925
IL32	16	3065297	3082193	+	512.682	141.9	38.6794	56.9647	5.50688e-12	6.93964e-10	4.91634	2.29758	4.91634	127.131	25.859	4.14063	5.83736
GLI3	7	41960949	42237871	-	11.4523	2.61687	1.02706	1.27247	2.63452e-05	0.000361318	4.90304	2.29368	4.90304	2.19291	0.447254	2.7829	8.63842
CFH	1	196652043	196747505	+	814.914	208.947	68.621	90.546	1.01149e-08	4.79573e-07	4.86746	2.28317	4.86746	184.531	37.9112	3.61418	6.55532
BATF3	1	212686417	212699841	-	134.405	33.8325	11.6091	14.9339	6.42641e-10	4.48164e-08	4.84192	2.27558	4.84192	29.9129	6.17789	3.8007	6.1684
LINC02577	7	106774955	106838481	+	14.4518	4.48305	1.13001	1.60576	4.56678e-05	0.000564114	4.81117	2.26639	4.81117	3.43386	0.713727	2.59301	8.92683
CXCL2	4	74097040	74099197	-	32.3	9.76806	2.70867	3.58889	6.84089e-07	1.72414e-05	4.80492	2.26451	4.80492	7.374	1.53468	3.20667	7.19976
TMEM229B	14	67447084	67533740	-	30.5341	6.28036	2.79852	3.39267	5.2613e-08	1.96833e-06	4.80264	2.26383	4.80264	5.73281	1.19368	3.44355	6.69813
B2M	15	44711487	44718878	+	3370.63	634.936	311.922	374.515	2.6442e-17	2.01919e-14	4.70122	2.23303	4.70122	624.864	132.915	4.37599	5.05062
REC8	14	24171853	24180258	+	40.5138	7.47885	3.61336	4.50153	1.91937e-06	4.06093e-05	4.64092	2.21441	4.64092	6.79988	1.4652	2.93683	7.33381
HERC6	4	88378739	88443098	+	189.322	32.6616	17.3539	21.0358	1.13201e-11	1.26065e-09	4.60624	2.20359	4.60624	30.8743	6.70272	3.8718	5.47999
OAS3	12	112938444	112973252	+	4051.84	717.178	375.362	450.204	8.28662e-16	3.60744e-13	4.58087	2.19562	4.58087	692.274	151.123	4.18951	5.00878
FP236383.3	21	8380643	8454793	+	127.872	27.3553	11.7974	14.208	2.50365e-10	1.95475e-08	4.5568	2.18802	4.5568	24.7832	5.43873	3.67592	5.64878
PSME2	14	24143362	24147571	-	1018.49	194.753	94.914	113.166	9.03477e-15	2.49603e-12	4.51887	2.17596	4.51887	189.188	41.8662	4.07074	5.01634
ST8SIA4	5	100806933	100903283	-	429.145	111.039	37.8868	47.6828	7.85621e-11	7.09826e-09	4.5142	2.17447	4.5142	93.6558	20.7469	3.71311	5.48812
ATP10D	4	47485275	47593487	+	112.703	27.0151	10.2662	12.5225	3.71901e-10	2.79724e-08	4.50639	2.17197	4.50639	23.2026	5.14882	3.61673	5.61489
DDX58	9	32455302	32526209	-	276.086	47.2767	25.1921	30.6762	5.22597e-10	3.71665e-08	4.43242	2.14809	4.43242	43.276	9.76353	3.53612	5.5559
CRYZL2P-SEC16B	1	177928788	178038008	-	63.7582	16.8211	5.69175	7.08424	1.26491e-06	2.90284e-05	4.42338	2.14515	4.42338	13.0018	2.93934	2.94196	6.65076
CADPS2	7	122318411	122886760	-	41.031	9.07158	3.81524	4.55899	5.12921e-08	1.92392e-06	4.4192	2.14378	4.4192	7.68044	1.73797	3.23229	6.04193
TRANK1	3	36826820	36945099	-	228.439	45.5319	21.1457	25.3821	5.4871e-09	2.81527e-07	4.39023	2.1343	4.39023	41.6016	9.47595	3.35837	5.73914
TRIM34	11	5619764	5644399	+	67.6338	12.5574	4.86557	7.51487	0.00270035	0.0150595	4.37045	2.12778	4.37045	12.1997	2.79141	1.14014	16.7531
DDX60L	4	168356735	168537787	-	346.258	64.9834	32.5701	38.4731	6.40267e-14	1.39365e-11	4.33154	2.11488	4.33154	60.9985	14.0824	3.85659	4.86499
GSDMB	17	39904595	39919855	-	21.7379	4.9405	1.84727	2.41532	0.000273187	0.00244676	4.32633	2.11314	4.32633	4.22841	0.977368	1.98834	9.41345
AGT	1	230702523	230714123	-	76.9624	22.4149	6.15085	8.55138	3.22599e-05	0.000425179	4.31258	2.10855	4.31258	17.6718	4.09773	2.49625	7.45051
TRAFD1	12	112125538	112153605	+	390.028	86.2742	34.7548	43.3364	7.65666e-15	2.29157e-12	4.29036	2.1011	4.29036	85.3977	19.9045	3.88363	4.73969
VASH2	1	212950520	212992038	+	151.001	30.9653	14.1052	16.7778	2.72316e-09	1.57768e-07	4.28212	2.09832	4.28212	27.4218	6.4038	3.33822	5.49291
SAMD9	7	93099513	93118024	-	234.793	38.3708	21.5348	26.0881	4.54945e-11	4.29133e-09	4.25075	2.08772	4.25075	35.2114	8.28357	3.54007	5.10409
CA13	8	85220587	85284074	+	73.9709	18.6664	6.08743	8.21899	9.04995e-08	3.11778e-06	4.16227	2.05737	4.16227	17.2035	4.13321	3.01994	5.73669
MSRB1	16	1938210	1943327	-	544.49	125.706	47.2855	60.4988	1.42178e-14	3.64736e-12	4.08774	2.0313	4.08774	122.72	30.0216	3.69686	4.51996
APOBEC3F	22	39040604	39055973	+	153.878	30.277	14.5379	17.0976	4.96189e-10	3.56412e-08	4.07791	2.02783	4.07791	28.8861	7.08355	3.30108	5.03754
OAS1	12	112906783	112933223	+	640.062	122.983	57.3685	71.118	5.31117e-13	8.87213e-11	3.95701	1.98441	3.95701	82.9102	20.9527	3.48781	4.48933
SP100	2	230415942	230545607	+	468.038	91.7361	44.6801	52.0042	8.07904e-14	1.70681e-11	3.94953	1.98168	3.94953	88.3621	22.3728	3.53582	4.41165
SEC16B	1	177923956	177984304	-	109.4	24.132	10.0134	12.1556	9.40817e-07	2.26775e-05	3.91527	1.96911	3.91527	21.9577	5.60821	2.7081	5.66056
TIMM23B-AGAP6	10	49942056	50011655	+	18.3044	5.43344	1.00414	2.03382	0.00924309	0.0393091	3.90809	1.96646	3.90809	2.38488	0.610243	-1.18014	18.0245
AC083862.1	7	135168403	135169548	+	25.5181	6.00982	2.21647	2.83534	9.42879e-05	0.00102694	3.86048	1.94878	3.86048	5.43005	1.40657	2.18789	6.81173
PSME1	14	24136163	24138968	+	1134.48	196.61	109.514	126.054	1.06809e-15	4.38404e-13	3.81133	1.9303	3.81133	193.126	50.6715	3.51865	4.12835
ANXA2R	5	43039081	43043171	-	14.7857	4.18464	1.36246	1.64285	4.25723e-05	0.000533482	3.80244	1.92693	3.80244	3.03245	0.797502	2.32777	6.21132
IRF2	4	184387729	184474551	-	199.845	42.5424	18.8737	22.205	3.35502e-12	4.38166e-10	3.79469	1.92398	3.79469	40.1685	10.5854	3.30112	4.36206
LGALS3BP	17	78971238	78979948	-	4079.63	654.259	389.477	453.292	1.47573e-15	5.81995e-13	3.75369	1.90831	3.75369	626.057	166.785	3.46238	4.0695
SHFL	19	10086122	10093253	+	226.203	37.7089	21.8764	25.1336	2.73759e-12	3.71021e-10	3.68712	1.8825	3.68712	36.7514	9.9675	3.22304	4.21803
HLA-C	6	31268749	31272131	-	2649.8	424.159	249.543	294.422	2.58565e-15	8.84415e-13	3.64638	1.86647	3.64638	373.198	102.348	3.35895	3.95841
AC040162.1	16	67929614	67936018	-	125.952	24.3307	12.1011	13.9947	1.13026e-08	5.18765e-07	3.64026	1.86404	3.64026	23.4996	6.45546	2.85052	4.6488
CISH	3	50606490	50611832	-	60.1525	14.5468	5.442	6.68361	4.48814e-07	1.20292e-05	3.63219	1.86084	3.63219	12.7935	3.52224	2.63239	5.01173
CDK18	1	205504595	205532794	+	43.9316	9.78941	4.20058	4.88129	8.42905e-07	2.07349e-05	3.62976	1.85987	3.62976	8.22752	2.26669	2.58978	5.08735
ADAP1	7	897900	955408	-	85.5945	14.5668	8.2382	9.5105	5.39405e-08	2.00459e-06	3.61817	1.85526	3.61817	13.9938	3.86764	2.75162	4.75762
CLEC2B	12	9852984	9870137	-	12.8824	2.83625	1.21897	1.43138	0.00025214	0.00228966	3.61803	1.8552	3.61803	2.26471	0.625953	2.05135	6.38122
LGALS9	17	27629798	27649561	+	46.5827	7.85043	4.24051	5.17585	2.69343e-05	0.000366419	3.61407	1.85363	3.61407	6.65555	1.84156	2.23603	5.84139
RPS6KA5	14	90847861	91060642	-	25.826	5.78584	2.45423	2.86955	5.52969e-06	9.67594e-05	3.58433	1.8417	3.58433	4.99385	1.39325	2.39963	5.35391
ZMYND15	17	4739833	4746120	+	17.1614	3.57636	1.65091	1.90682	2.31321e-05	0.0003258	3.53166	1.82035	3.53166	3.20842	0.908474	2.25758	5.52476
NAMPT	7	106248298	106286327	-	917.51	199.926	86.0897	101.946	5.30079e-14	1.20875e-11	3.50523	1.80951	3.50523	189.171	53.9681	3.17858	3.86545
DPYD	1	97077743	97995001	-	53.653	11.4362	5.18477	5.96144	7.1162e-08	2.52844e-06	3.48575	1.80147	3.48575	10.235	2.93625	2.66662	4.5565
MAFF	22	38200767	38216508	+	88.6616	20.7448	8.12266	9.85129	6.59402e-07	1.67367e-05	3.48467	1.80102	3.48467	18.4111	5.28346	2.50731	4.84301
LMO7	13	75620434	75859871	+	925.866	196.694	88.171	102.874	7.92457e-15	2.32336e-12	3.46577	1.79318	3.46577	186.338	53.7654	3.18273	3.77398
ERAP1	5	96760810	96808101	-	683.555	126.368	67.031	75.9506	1.51901e-11	1.64076e-09	3.45887	1.7903	3.45887	119.498	34.5483	2.99152	3.99924
NUB1	7	151341699	151378450	+	924.023	186.045	89.5084	102.669	8.3992e-15	2.41326e-12	3.42783	1.77729	3.42783	178.906	52.1922	3.14912	3.7312
AC008875.3	5	42983636	42993277	-	67.1336	14.6383	6.32032	7.45928	1.43153e-07	4.54986e-06	3.39789	1.76464	3.39789	13.5944	4.00082	2.56534	4.50063
KIAA1614	1	180912897	180951615	+	27.7289	5.64827	2.68733	3.08099	2.38569e-06	4.83396e-05	3.38355	1.75854	3.38355	5.2527	1.55242	2.36991	4.83075
AC245297.4	1	149175748	149259988	+	33.9043	7.72073	3.27419	3.76715	9.77498e-06	0.000159469	3.37555	1.75512	3.37555	6.07829	1.80068	2.25782	5.04662
SHISAL1	22	44243665	44312952	-	24.2889	6.10591	2.03253	2.69876	1.36181e-05	0.000209461	3.34788	1.74325	3.34788	5.49332	1.64083	2.23503	5.01484
CPM	12	68842197	68971571	-	103.563	24.6622	9.2842	11.507	6.16547e-09	3.09454e-07	3.31561	1.72928	3.31561	22.4059	6.7577	2.67391	4.11132
FBXO6	1	11664200	11674355	+	64.5343	14.2179	5.93292	7.17048	2.55823e-07	7.59329e-06	3.29989	1.72242	3.29989	13.5248	4.09855	2.46593	4.41588
MOB3C	1	46607715	46616892	-	72.5706	14.0894	7.09163	8.0634	1.01994e-08	4.8041e-07	3.29182	1.71889	3.29182	13.7409	4.17424	2.6352	4.11205
LINC01232	13	99486962	99499307	-	21.552	3.65965	1.97403	2.39467	0.000370815	0.00311346	3.28833	1.71736	3.28833	3.16177	0.961511	1.74992	6.17922
AL353807.5	1	155626757	155637605	-	102.913	19.0937	10.1411	11.4347	1.35362e-08	6.11513e-07	3.2806	1.71396	3.2806	18.3162	5.58318	2.61152	4.1211
CHKB-CPT1B	22	50568869	50582966	-	60.7043	11.5151	5.79623	6.74493	3.05635e-05	0.000407305	3.27101	1.70974	3.27101	10.5335	3.22026	2.11846	5.05062
TRIM38	6	25962802	25991232	+	278.949	50.136	27.697	30.9944	4.39071e-11	4.17728e-09	3.24422	1.69787	3.24422	48.1364	14.8376	2.79778	3.7619
ALPK1	4	112285509	112442622	+	148.044	33.8437	14.1887	16.4494	7.20234e-09	3.56789e-07	3.23826	1.69522	3.23826	29.303	9.049	2.61751	4.00621
SQOR	15	45631148	45691282	+	458.8	95.2516	44.101	50.9778	2.59413e-10	2.01444e-08	3.23188	1.69237	3.23188	90.537	28.0137	2.73146	3.82398
LXN	3	158645822	158672649	-	68.8523	15.2787	6.31978	7.65026	1.19831e-07	3.93035e-06	3.2244	1.68903	3.2244	14.4874	4.49306	2.46741	4.21363
ZNFX1	20	49237946	49278427	-	1851.79	363.827	183.208	205.755	5.57855e-13	9.10698e-11	3.1991	1.67767	3.1991	339.43	106.102	2.87447	3.5604
CXCL12	10	44370165	44386494	-	14.7267	3.22746	1.38426	1.6363	0.00113131	0.00749647	3.14825	1.65455	3.14825	2.49447	0.792337	1.62915	6.08383
BTN3A2	6	26365159	26378321	+	172.197	32.4321	17.1699	19.1331	5.47973e-10	3.87792e-08	3.1442	1.65269	3.1442	29.9287	9.51868	2.64579	3.73651
NAMPTP1	10	36521721	36524235	-	291.935	62.3699	27.7811	32.4372	3.53694e-09	1.93938e-07	3.13662	1.64921	3.13662	58.6109	18.686	2.56953	3.82886
CD47	3	108043091	108091863	-	407.177	87.7866	39.2892	45.2419	4.91552e-12	6.24923e-10	3.13092	1.64659	3.13092	80.6016	25.7437	2.76999	3.53888
HLA-H	6	29887752	29890483	+	15.1929	2.70016	1.48184	1.6881	0.000179461	0.00174316	3.12862	1.64553	3.12862	2.36212	0.755004	1.89391	5.16829
CBR3	21	36135079	36146563	+	134.188	27.0374	13.2448	14.9098	8.6447e-09	4.13966e-07	3.10213	1.63326	3.10213	24.8172	8.00005	2.51826	3.82137
OGFR	20	62804835	62814001	+	1522.31	269.27	152.601	169.145	2.16919e-13	4.15502e-11	3.09443	1.62967	3.09443	261.054	84.3627	2.80687	3.41145
PMAIP1	18	59899996	59904306	+	166.905	34.2776	16.5204	18.545	5.88949e-09	3.0003e-07	3.08467	1.62511	3.08467	30.5023	9.88835	2.51829	3.77842
CASP7	10	113679162	113730908	+	364.417	67.2509	36.4099	40.4908	1.4984e-10	1.24428e-08	3.08005	1.62295	3.08005	63.7374	20.6937	2.63733	3.59708
CSF1	1	109910242	109930993	+	518.133	106.851	49.3013	57.5703	1.04886e-11	1.19587e-09	3.06149	1.61423	3.06149	104.861	34.2515	2.69666	3.47567
CTSL	9	87726109	87731470	+	1415.44	318.563	136.46	157.271	2.5551e-11	2.62189e-09	3.05	1.60881	3.05	280.123	91.8438	2.66701	3.48798
PRDM1	6	105993463	106109940	+	13.1965	3.01923	1.27282	1.46627	0.00121278	0.00794782	3.03991	1.60403	3.03991	2.3602	0.776404	1.6885	5.47295
PHF11	13	49495610	49528982	+	74.0468	13.9064	7.35715	8.22743	2.08858e-07	6.31676e-06	3.01583	1.59256	3.01583	13.3546	4.42817	2.32352	3.91442
PRKCG	19	53879190	53907653	+	11.7843	2.37881	1.13274	1.30936	0.000657106	0.00487107	3.00086	1.58538	3.00086	2.26062	0.753323	1.7383	5.18045
BCO1	16	81238689	81291143	+	114.488	19.8253	11.4889	12.7209	1.87943e-08	8.15708e-07	2.98747	1.57893	2.98747	18.5716	6.21648	2.4067	3.7084
USP18	22	18150170	18177398	+	169.188	25.7306	16.8516	18.7986	6.75686e-10	4.67646e-08	2.9711	1.571	2.9711	24.9229	8.38845	2.51497	3.50996
NCKAP5	2	132671788	133568464	-	17.7504	4.71029	1.561	1.97226	0.00122464	0.00801149	2.94568	1.5586	2.94568	3.67461	1.24746	1.53434	5.65524
HLA-A	6	29941260	29945885	+	2261.11	370.347	221.274	251.235	1.66864e-13	3.42453e-11	2.92207	1.54699	2.92207	301.91	103.321	2.66844	3.19981
IL18R1	2	102311529	102398776	+	33.7841	5.87626	3.3645	3.75379	2.65776e-05	0.000362613	2.91265	1.54233	2.91265	5.65084	1.9401	1.97807	4.28879
NFIX	19	12995608	13098797	+	604.487	100.92	61.3288	67.1652	6.22551e-13	9.9373e-11	2.88462	1.52838	2.88462	97.2951	33.729	2.61423	3.18297
RAB43	3	129087569	129122802	-	86.5151	18.7578	8.59654	9.61279	1.81028e-08	7.97744e-07	2.87732	1.52472	2.87732	16.1718	5.62044	2.34511	3.53029
LHX9	1	197911902	197935479	+	17.5814	4.27367	1.67495	1.95349	0.000202861	0.00192236	2.8733	1.52271	2.8733	3.48908	1.21431	1.82923	4.5133
SOX7	8	10723768	10730512	-	10.2807	1.81792	1.00836	1.14231	0.00119947	0.00786829	2.87074	1.52142	2.87074	1.56857	0.5464	1.58596	5.19628
AC083862.2	7	135170816	135172415	+	14.8508	4.00657	1.46672	1.65009	0.00091726	0.00635054	2.86866	1.52037	2.86866	2.58659	0.901675	1.72122	4.78102
NFE2L3	7	26152198	26187138	+	298.051	57.8715	30.1979	33.1167	1.28577e-09	8.20949e-08	2.8409	1.50635	2.8409	50.2712	17.6955	2.40654	3.35366
GJD3	17	40360652	40364738	-	102.932	17.6405	10.4287	11.4369	2.85507e-08	1.17862e-06	2.83236	1.502	2.83236	16.3601	5.77615	2.2947	3.49599
CACNG6	19	53992288	54012670	+	16.4162	3.48913	1.65086	1.82402	0.000179819	0.00174546	2.82521	1.49836	2.82521	2.75731	0.975967	1.80796	4.41481
MOV10	1	112673141	112700747	+	602.745	107.898	61.2555	66.9717	1.76149e-12	2.5055e-10	2.81177	1.49148	2.81177	103.884	36.9461	2.53591	3.11764
UNC13A	19	17601328	17688366	-	24.8591	4.98593	2.44881	2.76212	0.00038432	0.00318957	2.80155	1.48622	2.80155	4.03354	1.43975	1.7127	4.58264
PAXIP1-AS2	7	154928460	154952189	+	78.2047	15.7015	7.84139	8.68941	2.57537e-06	5.10314e-05	2.79765	1.48422	2.79765	13.5912	4.85807	2.07453	3.77284
ADGRE1	19	6887566	6940460	+	76.8878	14.5124	7.78482	8.54309	3.05715e-07	8.85464e-06	2.77545	1.47272	2.77545	13.2116	4.76015	2.16743	3.55404
AL669918.1	6	32813767	32838823	-	138.197	29.1313	13.8628	15.3552	5.59724e-06	9.7667e-05	2.75347	1.46125	2.75347	22.589	8.20383	2.02189	3.74975
ACTL8	1	17755333	17827064	+	16.2617	3.65044	1.61349	1.80686	0.000826858	0.005824	2.7483	1.45854	2.7483	2.80334	1.02003	1.6481	4.58293
XRN1	3	142306607	142448063	-	279.184	54.7104	27.6664	31.0204	4.17377e-09	2.22076e-07	2.74032	1.45434	2.74032	52.5002	19.1584	2.29629	3.27022
AL671277.1	6	29942075	29943068	-	59.1868	11.2011	5.65377	6.57631	2.39812e-05	0.000335457	2.73938	1.45385	2.73938	7.46895	2.72651	1.88095	3.98959
AC020915.5	19	58228914	58315184	+	48.184	8.92101	4.8417	5.35378	3.76342e-05	0.000481865	2.72625	1.44692	2.72625	7.66958	2.81324	1.90278	3.90607
IL22RA1	1	24119771	24143141	-	111.208	19.4983	11.3593	12.3564	2.14439e-08	9.1143e-07	2.71852	1.44282	2.71852	18.2138	6.69989	2.22951	3.31479
GSDMD	8	143553207	143563063	+	404.458	72.2231	41.379	44.9398	1.0831e-11	1.21561e-09	2.71346	1.44013	2.71346	68.241	25.1491	2.42357	3.03802
CCL2	17	34255218	34257204	+	396.16	102.21	36.5163	44.0178	4.58031e-06	8.21483e-05	2.7023	1.43419	2.7023	80.5763	29.8176	2.00353	3.64478
ARID5B	10	61901684	62096945	+	50.7071	11.0702	4.88965	5.63413	1.68662e-05	0.000249794	2.69408	1.42979	2.69408	9.77559	3.62855	1.89082	3.83859
AC055716.2	12	52730425	52732866	+	15.1392	3.57636	1.47532	1.68213	0.00114472	0.0075732	2.69281	1.42911	2.69281	2.7909	1.03643	1.57568	4.60197
EFCAB12	3	129401321	129428652	-	17.3153	4.1171	1.642	1.92393	0.000340289	0.00290297	2.68623	1.42558	2.68623	3.43059	1.2771	1.68592	4.28003
SIX1	14	60643421	60658260	-	201.529	35.257	20.5761	22.3921	4.5851e-10	3.36069e-08	2.67122	1.4175	2.67122	34.9059	13.0674	2.3086	3.0908
GPR37	7	124743885	124765793	-	45.4413	9.7894	4.50668	5.04903	4.04398e-06	7.43214e-05	2.66295	1.41302	2.66295	8.51586	3.19791	1.98742	3.56809
MT1XP1	1	16241213	16241399	-	39.878	9.7937	3.72058	4.43089	0.00132268	0.00855931	2.65078	1.40642	2.65078	7.4448	2.80853	1.49397	4.70334
DNPEP	2	219373527	219400023	-	597.458	102.299	61.2596	66.3843	2.98419e-11	2.97715e-09	2.63977	1.40041	2.63977	101.181	38.3293	2.34525	2.97129
PLXNC1	12	94148577	94307676	+	37.7608	6.45471	3.71666	4.19564	0.00012175	0.00126835	2.63351	1.39699	2.63351	5.19574	1.97293	1.74786	3.96794
RNF19B	1	32936445	32964686	-	280.559	55.0764	28.2037	31.1732	7.19314e-11	6.58195e-09	2.62031	1.38974	2.62031	51.7257	19.7403	2.31208	2.96962
CCDC68	18	54901509	54959462	-	107.595	19.7132	10.9719	11.9551	2.96434e-09	1.68908e-07	2.61425	1.3864	2.61425	19.0601	7.29084	2.22039	3.07797
SEMA3E	7	83363238	83649140	-	63.1634	13.2306	5.82962	7.01815	1.3183e-05	0.00020452	2.60101	1.37907	2.60101	12.8392	4.93623	1.88815	3.58301
PARP3	3	51942345	51948868	+	305.333	53.2951	31.3996	33.9259	1.16782e-10	9.98621e-09	2.58883	1.3723	2.58883	51.586	19.9264	2.27801	2.94207
DIO2	14	80197526	80387758	-	14.203	2.37881	1.4539	1.57812	0.000423531	0.00344812	2.58796	1.37181	2.58796	2.20126	0.85058	1.65168	4.05497
RAB27A	15	55202966	55319114	-	80.4962	15.9436	7.89823	8.94402	3.49232e-07	9.81812e-06	2.58683	1.37118	2.58683	15.4218	5.96168	2.04636	3.27004
SLC25A28	10	99610522	99620610	-	197.04	34.4915	20.2289	21.8934	3.51587e-09	1.93521e-07	2.58232	1.36867	2.58232	33.4066	12.9366	2.19284	3.04099
MT2A	16	56608584	56609498	+	1755.7	384.093	170.554	195.077	0.000203918	0.0019311	2.57288	1.36338	2.57288	309.29	120.211	1.64379	4.02711
LIPT1	2	99154955	99163158	+	17.6535	3.3437	1.75651	1.96149	0.000787933	0.00560924	2.56211	1.35733	2.56211	2.99649	1.16954	1.51821	4.32376
ATF3	1	212565334	212620778	+	138.931	24.7935	14.2275	15.4368	1.346e-07	4.31621e-06	2.55961	1.35593	2.55961	23.4749	9.17128	2.05988	3.18058
ARNTL2	12	27332854	27425290	+	517.534	123.132	48.3058	57.5037	3.75936e-08	1.4878e-06	2.55587	1.35382	2.55587	104.606	40.9278	2.10536	3.10279
MLKL	16	74671855	74700961	-	425.719	76.7594	43.4231	47.3022	9.9475e-12	1.14325e-09	2.55409	1.35281	2.55409	75.6599	29.6231	2.2976	2.83921
RHBDL3	17	32265832	32324660	+	34.198	7.12272	3.26503	3.79977	5.64781e-05	0.000675012	2.53881	1.34415	2.53881	6.68827	2.63441	1.7482	3.68695
DRAM1	12	101877580	102012131	+	464.801	87.1631	46.7734	51.6446	1.80438e-11	1.93446e-09	2.53506	1.34202	2.53506	85.6686	33.7935	2.2716	2.82908
SLC2A12	6	133987581	134052625	-	13.0886	2.77147	1.1733	1.45429	0.00134382	0.00865467	2.5285	1.33828	2.5285	2.71446	1.07354	1.52853	4.18267
CHRM3	1	239386565	239915453	+	20.0479	4.36139	1.99917	2.22754	0.000532491	0.00413054	2.51925	1.33299	2.51925	3.62503	1.43894	1.61521	3.92927
LINC00623	1	120913184	121009292	+	11.7544	2.55267	1.16049	1.30605	0.0092386	0.0393091	2.51116	1.32836	2.51116	1.82297	0.725945	1.32096	4.77375
COL27A1	9	114155537	114312512	+	286.418	57.6933	28.5281	31.8242	1.14488e-10	9.84871e-09	2.50988	1.32762	2.50988	53.8543	21.4569	2.21859	2.83941
FAM117B	2	202634969	202769758	+	158.937	32.8842	15.9179	17.6597	1.03227e-08	4.83051e-07	2.50595	1.32536	2.50595	29.4778	11.7631	2.11119	2.97453
CXCL5	4	73995642	73998678	-	839.717	201.094	82.5858	93.3019	1.15154e-05	0.000182998	2.47883	1.30966	2.47883	154.899	62.489	1.83109	3.35571
AC018653.3	12	7129079	7131199	-	21.8534	4.09561	2.14009	2.42815	0.00307212	0.0166355	2.47419	1.30696	2.47419	3.65096	1.47562	1.37154	4.46332
STAT3	17	42313324	42388569	-	1871.73	363.99	185.744	207.97	5.29222e-14	1.20875e-11	2.47066	1.3049	2.47066	354.307	143.406	2.30201	2.65167
CRISPLD1	8	74984505	75034559	+	16.938	4.00657	1.65222	1.882	0.00159016	0.00988006	2.4646	1.30135	2.4646	3.14755	1.2771	1.48381	4.0937
SLFN11	17	35350305	35373702	-	281.564	48.9037	29.2257	31.2849	1.46688e-10	1.22519e-08	2.46109	1.2993	2.46109	46.2005	18.7724	2.17672	2.78261
DOCK4	7	111726110	112206408	-	179.047	37.2158	17.7772	19.8942	9.92587e-08	3.36184e-06	2.46069	1.29906	2.46069	33.5278	13.6254	2.01582	3.00372
TAPBP	6	33299694	33314388	-	3075.41	543.423	319.654	341.712	1.69137e-12	2.42982e-10	2.45413	1.29521	2.45413	497.448	202.698	2.24466	2.68315
MAPK8IP2	22	50600793	50613982	+	136.645	26.4295	14.023	15.1827	9.40124e-08	3.22335e-06	2.44897	1.29218	2.44897	23.6094	9.64053	2.00931	2.98483
CA11	19	48637946	48646188	-	106.596	21.2255	10.928	11.844	1.97242e-07	6.04175e-06	2.43916	1.28638	2.43916	18.5272	7.59574	1.97942	3.00567
ENOX1	13	43213518	43786909	-	12.544	2.49302	1.2591	1.39378	0.00154745	0.00967815	2.43365	1.28312	2.43365	2.22887	0.915856	1.45214	4.07855
RAB43P1	16	46626404	46626993	-	22.5538	4.46444	2.29008	2.50597	0.000793726	0.00564768	2.41856	1.27415	2.41856	3.62483	1.49875	1.51931	3.85006
FBLN5	14	91869412	91947988	-	31.7455	6.05433	3.12455	3.52728	0.000732268	0.0053023	2.41769	1.27363	2.41769	5.71161	2.36242	1.52649	3.82919
WDR25	14	100376418	100530304	+	133.126	27.2569	13.3965	14.7918	2.37857e-08	1.00502e-06	2.41139	1.26986	2.41139	24.4755	10.15	2.02553	2.87075
OPTN	10	13099449	13138309	+	582.666	109.905	59.4728	64.7406	3.29925e-11	3.22429e-09	2.40957	1.26877	2.40957	104.02	43.1697	2.1632	2.68398
MAP3K8	10	30434021	30461834	+	113.872	18.6664	11.8465	12.6525	5.7035e-08	2.10633e-06	2.40723	1.26737	2.40723	18.2257	7.57123	1.99535	2.90413
HDX	X	84317874	84502480	-	18.2404	3.48913	1.88581	2.02671	0.000500246	0.00392493	2.405	1.26604	2.405	2.90406	1.20751	1.59073	3.63608
B4GALNT3	12	459939	563510	+	12.4854	3.11072	1.10861	1.38726	0.00643067	0.0297423	2.40231	1.26443	2.40231	2.507	1.04358	1.25821	4.58677
SOD2	6	159669069	159762530	-	1030.25	205.782	104.299	114.473	5.83533e-12	7.18575e-10	2.39746	1.26151	2.39746	187.661	78.2748	2.18084	2.6356
ABHD16A	6	31686955	31703357	-	240.923	43.3512	24.8801	26.7693	1.90974e-09	1.18768e-07	2.3945	1.25973	2.3945	41.264	17.2328	2.07244	2.76662
SLC12A7	5	1050384	1112064	-	1760.63	304.414	182.156	195.626	1.79669e-12	2.53052e-10	2.39336	1.25904	2.39336	301.057	125.788	2.19316	2.61183
AP000295.1	21	33229901	33297161	+	75.2223	17.0602	7.56461	8.35803	0.000152285	0.00152247	2.3929	1.25876	2.3929	13.093	5.47163	1.66623	3.43647
ADAR	1	154582057	154628014	-	5339.91	891.531	557.665	593.323	1.94933e-13	3.88945e-11	2.39098	1.2576	2.39098	845.002	353.412	2.21922	2.57603
MDGA1	6	37630679	37699307	-	377.783	88.6528	33.8384	41.9759	2.96011e-08	1.21435e-06	2.38632	1.25479	2.38632	77.7804	32.5943	2.00025	2.8469
HSBP1L1	18	79964582	79970823	+	105.143	21.1009	10.6135	11.6825	6.16912e-08	2.25397e-06	2.38137	1.25179	2.38137	19.2154	8.06904	1.97766	2.86749
TMCC3	12	94567122	94650558	-	17.0278	3.40191	1.74335	1.89198	0.00160607	0.00994092	2.37718	1.24925	2.37718	2.67215	1.12408	1.47796	3.8235
LYPD1	2	132643286	132671580	-	59.4335	11.7986	6.03828	6.60372	0.000201864	0.00191418	2.36391	1.24118	2.36391	10.0097	4.23437	1.63419	3.41949
CLDN23	8	8701937	8704097	+	191.376	36.4145	19.7481	21.264	4.52554e-08	1.72909e-06	2.36386	1.24115	2.36386	32.6798	13.8247	1.97636	2.82734
FRMD4B	3	69168782	69542584	-	36.0689	7.85043	3.71141	4.00765	0.000114548	0.00121178	2.36307	1.24066	2.36307	5.9248	2.50725	1.6668	3.35021
SYNE2	14	63761899	64226434	+	423.052	73.6303	43.5873	47.0057	2.93064e-09	1.67736e-07	2.3569	1.23689	2.3569	73.0836	31.0083	2.03712	2.72689
IL15	4	141636583	141733988	+	61.8955	11.4362	6.38626	6.87728	1.62328e-05	0.000242413	2.33567	1.22384	2.33567	10.3277	4.42172	1.75275	3.11246
TRIM25	17	56836387	56914081	-	1859.19	326.659	194.349	206.577	1.37949e-11	1.50134e-09	2.33408	1.22285	2.33408	300.02	128.539	2.11694	2.57348
NUCB1	19	48900312	48923373	+	3003.83	574.364	303.169	333.759	2.16614e-12	3.02124e-10	2.33082	1.22084	2.33082	550.033	235.982	2.13957	2.53917
CFI	4	109740694	109802180	-	34.1665	5.58161	3.49942	3.79628	0.00018206	0.00176364	2.31938	1.21374	2.31938	4.75104	2.04841	1.62336	3.31381
TBX3	12	114670255	114684176	-	333.792	58.1795	34.4987	37.088	4.56914e-09	2.38692e-07	2.2966	1.1995	2.2966	57.3152	24.9566	1.98182	2.66136
GSTK1	7	143244093	143270855	+	895.15	162.21	92.582	99.4612	9.9332e-12	1.14325e-09	2.29277	1.19709	2.29277	154.66	67.4554	2.08851	2.51702
SLC25A22	11	790475	798282	-	954.96	164.264	99.4756	106.107	3.51889e-11	3.4157e-09	2.28039	1.18928	2.28039	160.305	70.2971	2.05973	2.5247
DENND5A	11	9138825	9265351	-	906.06	160.348	93.8451	100.673	6.58845e-13	1.0288e-10	2.27098	1.18331	2.27098	156.373	68.857	2.10396	2.45126
PLSCR4	3	146192335	146251180	-	53.0079	11.8022	5.18967	5.88976	3.45028e-05	0.000448568	2.26714	1.18087	2.26714	9.98084	4.4024	1.6776	3.06384
FAS	10	88990531	89017060	+	179.666	33.4374	18.3233	19.9629	3.34653e-07	9.46382e-06	2.25311	1.17192	2.25311	31.7995	14.1136	1.84461	2.75207
TRIM14	9	98069275	98119223	-	621.297	88.704	64.6626	69.033	1.06768e-11	1.20774e-09	2.24902	1.1693	2.24902	84.9949	37.7919	2.05179	2.46521
LINC01145	1	145164099	145216059	-	17.8965	3.20971	1.83	1.98851	0.00236061	0.0135759	2.2482	1.16877	2.2482	2.5206	1.12117	1.39942	3.61178
CD14	5	140631728	140633702	-	30.1665	6.97817	2.94047	3.35183	0.000692758	0.00506471	2.24392	1.16602	2.24392	5.6101	2.50013	1.47799	3.40679
TDRD7	9	97412096	97496126	+	135.098	20.3237	14.1475	15.0109	3.57728e-08	1.42754e-06	2.24146	1.16444	2.24146	19.36	8.6372	1.89898	2.64571
DCHS1	11	6621330	6655810	-	17.7477	3.37453	1.80616	1.97197	0.0039305	0.0201879	2.24127	1.16432	2.24127	2.90779	1.29739	1.34329	3.73956
SCML1	X	17737449	17754989	+	138.213	22.7661	14.5433	15.357	2.83286e-08	1.17282e-06	2.2383	1.1624	2.2383	21.3193	9.52475	1.90426	2.63093
RNF114	20	49936336	49953886	+	747.664	129.811	77.7242	83.0738	2.73467e-12	3.71021e-10	2.23261	1.15873	2.23261	127.668	57.183	2.05547	2.42502
CTRL	16	67927640	67932366	-	10.4503	2.01154	1.05069	1.16115	0.0136517	0.0530917	2.23137	1.15793	2.23137	1.70686	0.764936	1.18323	4.20799
SFMBT2	10	7158624	7411487	-	143.061	28.0454	14.795	15.8957	5.59937e-07	1.44938e-05	2.22349	1.15283	2.22349	24.4017	10.9745	1.81493	2.72403
CEP162	6	84124241	84227644	-	30.0528	5.21496	3.11467	3.3392	0.000149973	0.00150454	2.21625	1.14812	2.21625	5.02794	2.26867	1.57513	3.11833
CBR3-AS1	21	36131767	36175816	-	16.1475	3.80347	1.55081	1.79417	0.0140363	0.0541474	2.21596	1.14793	2.21596	2.58243	1.16538	1.0974	4.47465
AL669830.2	6	30908242	30926460	+	22.7862	3.98266	2.25563	2.5318	0.00618184	0.028862	2.2147	1.14711	2.2147	3.36891	1.52116	1.22644	3.99929
PLD5	1	242082986	242524698	-	147.089	25.6397	15.2962	16.3433	1.12732e-06	2.65928e-05	2.21427	1.14683	2.21427	24.45	11.042	1.78668	2.74421
AC097709.1	4	73997933	74007683	+	27.3835	5.81856	2.84013	3.04261	0.000350859	0.00297371	2.20972	1.14387	2.20972	4.52282	2.04678	1.53929	3.17216
GABARAPL1	12	10212458	10223129	+	143.913	28.68	14.598	15.9904	2.80293e-06	5.47849e-05	2.20685	1.14199	2.20685	25.6136	11.6064	1.74925	2.78418
TTLL6	17	48762235	48817215	-	54.1041	9.07159	5.66471	6.01157	2.65789e-05	0.000362613	2.2026	1.13921	2.2026	8.32414	3.77923	1.66005	2.92248
NT5C3AP1	4	117574512	117576175	-	20.9337	3.79316	2.16466	2.32597	0.00209882	0.0123877	2.20169	1.13861	2.20169	3.04135	1.38137	1.42182	3.40932
NUDCD1	8	109240919	109334119	-	343.08	62.323	35.9472	38.12	7.64033e-10	5.16436e-08	2.19855	1.13655	2.19855	56.5897	25.7396	1.94804	2.48126
C1RL-AS1	12	7108052	7122502	+	76.9553	13.9673	8.04028	8.55059	1.57549e-06	3.45024e-05	2.19754	1.13589	2.19754	12.741	5.79783	1.76742	2.73235
SGPP2	2	222424543	222562622	+	93.4917	16.2041	9.70041	10.388	3.26421e-05	0.000428253	2.19346	1.13321	2.19346	15.1116	6.88938	1.63822	2.9369
UNC5A	5	176810519	176880899	+	15.8008	3.40191	1.36103	1.75564	0.00708677	0.0321938	2.18886	1.13018	2.18886	3.21044	1.46672	1.25629	3.81371
AC073111.4	7	150400702	150412471	+	71.0042	11.872	7.47459	7.88936	2.58925e-06	5.12357e-05	2.18823	1.12976	2.18823	10.8636	4.96457	1.74357	2.74629
AC116366.3	5	132410832	132646080	+	87.9423	15.8253	8.86835	9.77136	0.00459487	0.0228171	2.18327	1.12649	2.18327	12.3804	5.6706	1.39584	3.41491
NT5C3A	7	33014114	33062798	-	269.031	43.4858	28.3792	29.8924	8.09243e-09	3.9331e-07	2.18085	1.12489	2.18085	40.9553	18.7795	1.89067	2.51557
CALCOCO2	17	48830988	48866523	+	691.987	114.361	72.7467	76.8875	6.39568e-12	7.6567e-10	2.17913	1.12375	2.17913	113.132	51.9159	2.00131	2.37275
MITD1	2	99161427	99181059	-	109.061	22.4703	11.1958	12.1179	6.54356e-06	0.00011258	2.17469	1.12081	2.17469	18.8329	8.66003	1.70035	2.78136
BACH1	21	29194071	29630752	+	221.153	38.99	23.0244	24.5725	8.13122e-09	3.9331e-07	2.16458	1.11409	2.16458	37.5024	17.3255	1.8788	2.49384
DYSF	2	71453722	71686769	+	18.3313	4.48305	1.67704	2.03682	0.00403189	0.0205763	2.16075	1.11153	2.16075	3.6047	1.66826	1.33536	3.49633
EVA1C	21	32412006	32515398	+	377.46	62.323	39.6458	41.94	4.06324e-07	1.10974e-05	2.14635	1.10188	2.14635	58.883	27.434	1.76909	2.60407
AC005324.3	17	15571491	15651654	-	12.2982	2.52858	1.19071	1.36647	0.022977	0.0781689	2.13927	1.09712	2.13927	1.52845	0.714474	1.08787	4.20684
GTPBP1	22	38705742	38738300	+	400.543	67.7815	42.1674	44.5047	8.46975e-11	7.5976e-09	2.13742	1.09587	2.13742	65.3899	30.5929	1.9347	2.36138
HEG1	3	124965710	125055998	-	393.469	64.8658	41.4233	43.7188	4.80958e-10	3.47208e-08	2.13313	1.09297	2.13313	64.0096	30.0074	1.9051	2.38845
SNTB2	16	69187129	69309053	+	628.38	115.138	65.17	69.82	3.56834e-10	2.69804e-08	2.12429	1.08698	2.12429	107.963	50.8228	1.90372	2.37043
FOXP1	3	70952817	71583990	-	354.532	63.7475	36.8036	39.3924	2.72354e-09	1.57768e-07	2.12223	1.08558	2.12223	60.6981	28.601	1.86921	2.40951
SH3BP2	4	2793071	2841099	+	173.173	32.5353	17.3471	19.2414	6.28114e-08	2.2761e-06	2.11719	1.08215	2.11719	31.6629	14.9551	1.80117	2.48865
NREP	5	111662621	111997465	-	98.2106	14.9977	10.4085	10.9123	2.75614e-07	8.11368e-06	2.11363	1.07972	2.11363	14.7374	6.97259	1.76428	2.53215
ADGRF4	6	47685864	47722022	+	141.944	27.2637	14.4602	15.7716	1.49259e-06	3.30904e-05	2.11335	1.07953	2.11335	25.0912	11.8727	1.71416	2.60551
CASP8	2	201233443	201287712	+	536.311	89.6682	56.4829	59.5902	1.12627e-10	9.74695e-09	2.11096	1.0779	2.11096	87.5197	41.4596	1.90958	2.33358
PLPP3	1	56494761	56645302	-	284.482	53.9025	29.5732	31.6091	1.55727e-07	4.89536e-06	2.1098	1.07711	2.1098	48.0636	22.7811	1.77551	2.50702
CLSTN3	12	7129698	7158946	+	226.995	38.8184	23.8058	25.2217	3.55424e-07	9.93389e-06	2.10298	1.07244	2.10298	37.044	17.615	1.75258	2.52344
HELB	12	66302493	66343644	+	45.6671	8.54823	4.76566	5.07412	0.0001318	0.00134477	2.09077	1.06403	2.09077	7.42105	3.54944	1.52384	2.86862
HK1	10	69269984	69401885	+	671.657	129.453	67.7751	74.6285	3.69442e-11	3.53827e-09	2.09034	1.06374	2.09034	121.636	58.1895	1.9082	2.28987
KCNJ2	17	70168673	70180045	+	21.2346	3.93412	2.22214	2.3594	0.00109545	0.00731932	2.08815	1.06222	2.08815	3.42654	1.64095	1.41672	3.07778
EIF2AK2	2	37099210	37157066	-	1969.55	283.313	208.279	218.839	4.30644e-10	3.17263e-08	2.08644	1.06104	2.08644	278.502	133.482	1.87132	2.32629
RBCK1	20	407498	432140	+	3095.77	496.716	328.074	343.974	8.40567e-13	1.28464e-10	2.08539	1.06032	2.08539	490.094	235.013	1.94508	2.23583
SLC7A2	8	17497088	17570574	+	64.9341	12.4647	6.62643	7.2149	0.000208424	0.00196213	2.08226	1.05815	2.08226	11.122	5.34132	1.48439	2.92092
AP000356.3	22	24644791	24653357	+	11.6137	2.34089	1.10397	1.29041	0.0248318	0.0828842	2.08085	1.05717	2.08085	2.09278	1.00573	1.05389	4.10854
IKZF2	2	212999691	213152428	-	13.1713	2.26797	1.37594	1.46348	0.0060289	0.0282673	2.08071	1.05708	2.08071	2.07824	0.998815	1.27713	3.38991
ADAMTSL4	1	150549369	150560938	+	60.0858	13.4536	5.88776	6.6762	8.03059e-05	0.0008985	2.07919	1.05602	2.07919	11.144	5.35979	1.55923	2.77255
MICU3	8	17027238	17122643	+	17.4321	3.48913	1.79584	1.9369	0.0102076	0.0423944	2.07098	1.05032	2.07098	2.51989	1.21676	1.24535	3.44398
VPS9D1	16	89707134	89720899	-	113.115	22.0788	11.5876	12.5684	1.25033e-05	0.000195242	2.06834	1.04847	2.06834	19.6595	9.505	1.62914	2.62594
ITPKC	19	40717112	40740861	+	374.041	69.7808	38.3609	41.5601	2.64881e-09	1.56584e-07	2.0676	1.04795	2.0676	65.7478	31.7991	1.82996	2.33609
CREG1	1	167529117	167553806	-	1177.24	219.662	121.058	130.804	1.85749e-08	8.09634e-07	2.0669	1.04747	2.0669	204.84	99.1049	1.79235	2.3835
LIPH	3	185506262	185552589	-	216.559	41.3451	22.4823	24.0621	5.37604e-07	1.40167e-05	2.06023	1.0428	2.06023	36.7029	17.815	1.71392	2.47652
PSMA4	15	78540405	78552418	+	1600.99	266.782	169.412	177.888	1.45865e-12	2.11667e-10	2.05842	1.04154	2.05842	257.631	125.16	1.91718	2.21006
AP002414.4	18	12067173	12068418	-	120.931	22.9706	12.7222	13.4368	5.02969e-06	8.88765e-05	2.05551	1.0395	2.05551	19.367	9.42197	1.65124	2.55877
PPA1	10	70202835	70233912	-	951.174	156.975	100.441	105.686	9.49283e-12	1.10873e-09	2.05223	1.03719	2.05223	154.671	75.3674	1.89285	2.22503
IFITM2	11	307631	315273	+	257.52	38.2537	27.1901	28.6133	3.58315e-07	9.99524e-06	2.05141	1.03661	2.05141	36.1593	17.6266	1.71616	2.45215
ANK2	4	112818032	113384222	+	212.982	40.6211	21.477	23.6646	1.06705e-08	4.92901e-07	2.04674	1.03333	2.04674	38.4468	18.7844	1.78993	2.3404
CYLD	16	50742050	50801936	+	177.96	33.8509	18.2749	19.7733	4.82682e-08	1.82e-06	2.04046	1.02889	2.04046	31.1574	15.2698	1.7577	2.3687
PUS3	11	125893485	125903222	-	55.5055	10.0639	5.81787	6.16728	3.72588e-05	0.000477485	2.03917	1.02798	2.03917	9.10765	4.46636	1.56924	2.64981
MAP2	2	209424058	209734119	+	150.572	34.3084	15.0645	16.7302	0.000410286	0.0033681	2.03412	1.02441	2.03412	26.5353	13.0451	1.46299	2.82821
HNF4G	8	75407914	75566835	+	51.3071	8.46101	5.43357	5.70079	5.69175e-05	0.000679413	2.03062	1.02192	2.03062	7.57659	3.73117	1.54442	2.66989
LY6G5B	6	31670167	31673777	+	21.5961	3.6057	2.20686	2.39956	0.00761215	0.033951	2.02939	1.02105	2.02939	2.99953	1.47805	1.20962	3.40472
HK2	2	74834127	74893360	+	46.8884	8.81435	4.70059	5.20982	0.00592654	0.0278638	2.0292	1.02091	2.0292	6.26282	3.08635	1.2279	3.35342
RNF24	20	3927309	4015559	-	350.622	61.1451	36.5995	38.958	4.72103e-10	3.44275e-08	2.02717	1.01947	2.02717	59.3276	29.2662	1.82519	2.2515
AL031274.1	1	171339299	171339960	+	36.242	6.32143	3.83511	4.02688	0.000151982	0.00152247	2.02394	1.01717	2.02394	5.64674	2.78997	1.49963	2.73156
PDGFRL	8	17576433	17644072	+	60.9341	10.8161	6.46794	6.77045	2.94506e-05	0.000394671	2.01818	1.01305	2.01818	9.08699	4.50257	1.57339	2.5887
AC092368.3	16	46622861	46624452	-	35.1677	7.07048	3.468	3.90753	0.00598982	0.0281117	2.0168	1.01207	2.0168	5.99163	2.97087	1.19383	3.40706
MCUB	4	109560209	109688720	+	147.722	26.4428	15.5585	16.4135	4.11074e-07	1.11424e-05	2.01509	1.01084	2.01509	24.0703	11.9451	1.69185	2.40009
ETV6	12	11649674	11895378	+	255.952	42.6535	27.0494	28.4392	1.0162e-08	4.80221e-07	2.00107	1.00077	2.00107	41.4611	20.7195	1.75815	2.27755
PSMA3	14	58244843	58272013	+	708.346	112.434	75.5349	78.7051	3.23938e-10	2.46227e-08	1.99793	0.998508	1.99793	107.899	54.0055	1.8073	2.20867
UBE2D3P2	3	37134658	37135103	+	16.0159	3.60389	1.64623	1.77954	0.0150154	0.0569308	1.9977	0.998343	1.9977	2.53609	1.2695	1.18026	3.38131
AC008429.2	5	172975511	172976375	+	172.562	28.725	18.2679	19.1735	4.49822e-08	1.72324e-06	1.99521	0.996541	1.99521	27.7689	13.9178	1.72747	2.30445
CEBPB	20	50190830	50192669	+	2500.12	432.728	263.986	277.791	2.82438e-07	8.26377e-06	1.99327	0.99514	1.99327	396.388	198.863	1.68395	2.35942
ARAP2	4	35948221	36244515	-	54.399	8.63628	5.77355	6.04434	4.75827e-05	0.00058425	1.99305	0.994979	1.99305	8.24027	4.1345	1.53052	2.59537
USF1	1	161039251	161045978	-	282.449	45.5615	29.9959	31.3833	4.6882e-08	1.78649e-06	1.98347	0.988025	1.98347	44.3475	22.3586	1.71709	2.29116
TRIB1	8	125430358	125438404	+	450.227	82.3552	47.2229	50.0252	1.0283e-06	2.45799e-05	1.97438	0.981398	1.97438	73.5601	37.2574	1.64351	2.37186
FAM111A-DT	11	59130133	59143016	-	16.0469	2.7041	1.66057	1.78299	0.0143677	0.0550713	1.97209	0.979725	1.97209	2.40905	1.22158	1.17128	3.3204
MYD88	3	38138478	38143023	+	680.702	111.3	72.6716	75.6335	3.87592e-09	2.08545e-07	1.96411	0.973874	1.96411	102.682	52.2793	1.74719	2.20795
GSAP	7	77310751	77416350	-	61.0809	10.6416	6.37169	6.78676	0.000347922	0.00295231	1.95846	0.969719	1.95846	9.74355	4.97511	1.40891	2.72236
TMEM262	11	65084979	65089376	-	11.5468	1.83529	1.20928	1.28298	0.0170147	0.0625788	1.95549	0.967531	1.95549	1.60822	0.822411	1.15095	3.32241
MCL1	1	150574551	150579739	-	1952.07	332.541	205.777	216.897	1.97947e-10	1.59759e-08	1.94765	0.961738	1.94765	320.133	164.368	1.77433	2.13791
URAHP	16	90039761	90047774	-	15.4354	2.78382	1.56872	1.71505	0.024621	0.0824105	1.94668	0.961015	1.94668	2.19061	1.12531	1.06775	3.5491
TRIM56	7	101085481	101097968	+	1913.89	286.597	205.026	212.654	8.07501e-12	9.50865e-10	1.94328	0.958491	1.94328	283.026	145.644	1.80499	2.09216
TNFAIP3	6	137867214	137883313	+	114.269	18.7536	12.1294	12.6966	1.34133e-05	0.000206819	1.93865	0.955052	1.93865	17.6094	9.08334	1.55301	2.42005
KDSR	18	63327726	63367229	-	396.323	66.7279	41.5711	44.0359	2.97464e-09	1.68908e-07	1.93831	0.954797	1.93831	65.9545	34.0269	1.73126	2.17011
CXCL16	17	4733531	4739929	-	335.82	51.6913	35.9648	37.3133	5.10565e-09	2.63841e-07	1.93219	0.950239	1.93219	48.6662	25.1871	1.71931	2.17143
KIF12	9	114086126	114099292	-	108.41	18.8751	11.4967	12.0456	2.31337e-06	4.71403e-05	1.92748	0.946712	1.92748	17.2629	8.95621	1.59646	2.32712
RAB31	18	9708275	9862552	+	345.164	58.187	36.3641	38.3515	3.60285e-07	1.00237e-05	1.92323	0.943529	1.92323	56.091	29.165	1.6366	2.26005
SERF1A	5	70900665	70918531	+	15.218	3.04018	1.45141	1.69089	0.0669156	0.172093	1.92273	0.943155	1.92273	2.22181	1.15555	-1.19006	4.3995
MSL3P1	2	233865437	233868445	-	75.4213	13.8253	7.60814	8.38015	0.0207994	0.0725078	1.91913	0.940451	1.91913	10.1384	5.2828	1.15185	3.19752
HSPA6	1	161524540	161526895	+	64.2143	21.6829	4.81967	7.13492	0.0573657	0.153553	1.91835	0.939869	1.91835	13.0042	6.77881	1.05082	3.50211
PSMA6P1	Y	13286638	13287379	+	94.2911	16.7906	9.98159	10.4768	1.62985e-05	0.000242637	1.91715	0.938965	1.91715	14.9733	7.81016	1.53801	2.38975
CU633906.2	21	6228966	6267318	-	97.2426	15.1701	10.2574	10.8047	0.000269444	0.00241776	1.9123	0.935309	1.9123	13.6533	7.13971	1.41448	2.58532
KLF4	9	107484852	107490483	-	200.421	34.5448	21.4136	22.269	8.72111e-07	2.11848e-05	1.91049	0.933942	1.91049	30.1126	15.7617	1.61311	2.26268
AL355032.1	14	101677943	101678381	+	9.90537	1.93954	1.02117	1.1006	0.0776457	0.192089	1.90847	0.932414	1.90847	1.49525	0.783483	1.01122	3.60183
AC007192.1	19	18153158	18178118	+	166.794	33.735	17.5131	18.5327	0.000304907	0.00266603	1.90477	0.929616	1.90477	26.1874	13.7483	1.43845	2.52225
COQ8B	19	40691530	40718208	-	538.17	93.3956	56.4364	59.7967	7.5627e-10	5.14909e-08	1.90397	0.929008	1.90397	89.5962	47.0577	1.72448	2.10213
XPR1	1	180632022	180890280	+	926.561	165.778	96.557	102.951	2.45038e-08	1.0293e-06	1.90082	0.926621	1.90082	155.717	81.9212	1.67184	2.16116
BTC	4	74744759	74794524	-	28.3518	5.164	2.92313	3.1502	0.00396962	0.0203379	1.89799	0.924473	1.89799	4.65953	2.45498	1.24558	2.89212
C5orf15	5	133955510	133968675	-	834.43	132.932	89.3941	92.7144	7.54403e-09	3.71031e-07	1.89795	0.924442	1.89795	124.482	65.5875	1.68854	2.13333
ZBTB45P1	2	109986939	109988395	-	27.0298	5.45684	2.5315	3.00331	0.0621367	0.162745	1.88613	0.915431	1.88613	4.53849	2.40624	-1.12624	4.00658
OTUD4P1	12	3839459	3842526	+	50.8192	8.56443	5.42878	5.64658	0.00012215	0.00127015	1.88361	0.9135	1.88361	7.63992	4.056	1.45088	2.44541
DENND4A	15	65658046	65792294	-	227.645	38.0306	24.0882	25.2939	2.44252e-07	7.29506e-06	1.87841	0.909515	1.87841	36.6804	19.5273	1.61425	2.18581
CBR1	21	36069941	36073167	+	2197.65	350.338	235.591	244.184	2.10115e-11	2.20329e-09	1.87328	0.905564	1.87328	335.827	179.273	1.73873	2.01823
CDC26	9	113255835	113275573	-	54.8043	9.97444	5.77159	6.08937	0.000925266	0.00639672	1.8717	0.90435	1.8717	8.47281	4.52679	1.34129	2.61186
CCDC71L	7	106654360	106661159	-	187.125	31.9248	19.8911	20.7917	3.94728e-07	1.08219e-05	1.86757	0.901164	1.86757	29.6713	15.8876	1.60024	2.17957
MMAA	4	145599042	145660034	+	30.2651	5.87626	3.13374	3.36278	0.0013602	0.00874695	1.86598	0.899935	1.86598	5.09414	2.73001	1.33601	2.60619
NR4A3	9	99821855	99866892	+	12.5042	2.04589	1.24467	1.38936	0.0195508	0.0692814	1.86586	0.899839	1.86586	1.45678	0.780754	1.0307	3.37773
TTLL7	1	83865024	83999151	-	65.8997	12.1245	7.01694	7.32219	0.000231107	0.00213647	1.86504	0.899209	1.86504	9.91875	5.31824	1.42434	2.4421
MDK	11	46380756	46383838	+	23.4257	5.48655	2.19113	2.60286	0.00649509	0.0299834	1.86155	0.896508	1.86155	2.16995	1.16567	1.1858	2.92241
AC107081.2	2	61868432	61886083	+	10.5002	2.02498	1.04415	1.16669	0.0703865	0.178432	1.86097	0.896058	1.86097	1.27655	0.685956	-1.0468	3.62529
NKX3-1	8	23678697	23682939	-	135.788	22.1404	14.5109	15.0875	2.71166e-06	5.31456e-05	1.85682	0.892833	1.85682	20.8442	11.2258	1.55098	2.22297
RBP5	12	7115736	7128890	-	24.8765	6.11187	2.57017	2.76405	0.0200346	0.0705433	1.85646	0.892551	1.85646	3.99257	2.15064	1.1848	2.90887
MAX	14	65006174	65102696	-	456.529	72.1078	48.9564	50.7254	1.58503e-08	7.07158e-07	1.8549	0.891341	1.8549	69.0514	37.2265	1.64637	2.08984
BANK1	4	101411286	102074813	+	25.1422	4.02561	2.64153	2.79357	0.00295502	0.0161414	1.85066	0.888037	1.85066	3.98581	2.15373	1.2569	2.72491
GUK1	1	228139962	228148985	+	1180.32	187.278	126.37	131.147	5.20436e-10	3.71665e-08	1.84926	0.886945	1.84926	182.057	98.4486	1.68671	2.02747
PARP11	12	3791047	3873449	-	21.9333	4.09971	2.27714	2.43703	0.00874232	0.0376814	1.84134	0.880756	1.84134	3.5683	1.93789	1.2021	2.8205
SAMD11	1	923928	944582	+	288.9	48.0752	29.3736	32.1	0.0105104	0.0433939	1.83812	0.878228	1.83812	38.2699	20.8202	1.15276	2.93094
FBXW10	17	18744026	18779350	+	15.1893	2.74137	1.57125	1.6877	0.0353714	0.107887	1.8355	0.876174	1.8355	2.16261	1.17821	1.04025	3.23869
LSM6	4	146175703	146200001	+	61.4417	9.51494	6.55061	6.82685	0.000344562	0.00292552	1.8338	0.874834	1.8338	8.90102	4.85387	1.37197	2.45109
KIF5A	12	57550044	57586634	+	16.6854	3.2937	1.61328	1.85394	0.0330228	0.102596	1.83188	0.873326	1.83188	2.92232	1.59525	1.01336	3.31155
FAM47E-STBD1	4	76251721	76311130	+	21.925	4.53182	1.99842	2.43611	0.0671235	0.172356	1.8304	0.872158	1.8304	3.8957	2.12833	-1.14263	3.82824
ACBD7	10	15075475	15088777	-	25.2282	4.34585	2.64393	2.80313	0.00442065	0.0221372	1.82571	0.868454	1.82571	3.1572	1.72931	1.2458	2.67555
STAT5A	17	42287547	42311944	+	21.8489	4.01563	2.13232	2.42765	0.00708819	0.0321938	1.82034	0.864211	1.82034	3.9174	2.15201	1.18027	2.80753
SLFN5	17	35243071	35273656	+	104.171	18.5792	10.8984	11.5745	2.66449e-05	0.000363169	1.81862	0.862847	1.81862	17.1745	9.44365	1.47067	2.24891
PLTP	20	45898621	45912156	-	11.1069	1.78691	1.15468	1.2341	0.0289709	0.093234	1.8118	0.857422	1.8118	1.45878	0.805156	1.02519	3.20197
PYCARD	16	31201486	31203451	-	11.8145	2.44242	1.12875	1.31272	0.0535771	0.145774	1.80856	0.854839	1.80856	2.0192	1.11647	-1.11961	3.66211
XDH	2	31334321	31414743	-	61.5495	9.70467	6.54653	6.83883	0.00106205	0.00712296	1.80286	0.850289	1.80286	8.68789	4.81894	1.31425	2.47312
TOP1	20	41028822	41124488	+	1552.66	250.983	166.429	172.517	9.91462e-11	8.73825e-09	1.80218	0.849745	1.80218	239.845	133.086	1.66672	1.94865
PANO1	11	797511	799186	+	20.2567	3.5614	2.13885	2.25075	0.0200037	0.0704772	1.80169	0.849354	1.80169	2.93935	1.63144	1.14236	2.84157
TRIM5	11	5663195	5938620	-	261.67	39.339	28.1972	29.0744	1.74287e-07	5.41951e-06	1.8012	0.848959	1.8012	37.8584	21.0184	1.5714	2.0646
SEPTIN6	X	119615724	119693371	-	164.639	26.1757	17.7347	18.2932	1.44614e-06	3.22597e-05	1.80005	0.848036	1.80005	23.3437	12.9684	1.53236	2.1145
UNC5D	8	35235475	35796551	+	25.0394	3.75114	2.68376	2.78215	0.00215834	0.0126507	1.79958	0.847663	1.79958	3.39523	1.88667	1.28284	2.52448
RAB39A	11	107928448	107963483	+	15.3337	2.26797	1.64445	1.70374	0.00792131	0.0349931	1.79909	0.847264	1.79909	2.0807	1.15653	1.19186	2.71567
TEAD4	12	2959330	3040677	+	458.175	73.2742	49.2877	50.9084	3.74392e-07	1.03433e-05	1.79881	0.84704	1.79881	66.5921	37.0202	1.55545	2.08024
SSBP4	19	18418864	18434563	+	422.429	67.4869	45.0415	46.9365	2.46636e-06	4.94857e-05	1.7957	0.84455	1.7957	65.3085	36.3693	1.51404	2.12977
AL158801.6	14	55229217	55229682	+	25.9299	4.37575	2.74481	2.8811	0.00636128	0.0294966	1.7952	0.844147	1.7952	3.75858	2.09368	1.18441	2.72098
AC067930.8	8	143541648	143545129	+	14.0264	2.7118	1.38206	1.55849	0.0703035	0.178347	1.79379	0.843008	1.79379	2.21294	1.23367	-1.14352	3.67948
ZNF267	16	31873807	31917358	+	140.82	24.6622	15.0604	15.6467	6.02443e-05	0.000712907	1.79183	0.841433	1.79183	20.9386	11.6856	1.43229	2.24162
CDC42SE2	5	131245493	131398448	+	530.125	82.516	56.9003	58.9027	4.3278e-09	2.27741e-07	1.79132	0.841021	1.79132	81.1424	45.2976	1.61748	1.98383
MYCBP2	13	77044657	77327095	-	575.007	92.5889	61.7448	63.8897	2.03643e-08	8.70696e-07	1.78954	0.839589	1.78954	87.3438	48.808	1.59548	2.0072
SCYL3	1	169849631	169894268	-	58.7397	10.1412	6.21027	6.52663	0.00062316	0.00465781	1.77983	0.831742	1.77983	9.23669	5.18964	1.33669	2.36989
EXOC3L4	14	103100144	103110560	+	13.0422	2.37051	1.30648	1.44913	0.0943324	0.22057	1.77909	0.831139	1.77909	1.69506	0.952769	-1.12796	3.57018
C1RL	12	7089587	7109239	-	305.961	52.518	32.8044	33.9956	1.56373e-06	3.42969e-05	1.77	0.823748	1.77	46.4385	26.2365	1.51405	2.06921
LINC01138	1	148290889	148519605	-	18.9617	3.33705	2.03383	2.10686	0.00840936	0.0365202	1.76313	0.818137	1.76313	2.72629	1.54628	1.18667	2.61963
TLCD2	17	1702816	1710378	-	196.878	38.4254	20.1188	21.8754	0.0010415	0.00701133	1.75807	0.813991	1.75807	32.9258	18.7284	1.30944	2.3604
PCSK6	15	101297142	101525203	-	364.075	63.3333	38.708	40.4528	2.94232e-07	8.56872e-06	1.75734	0.813394	1.75734	57.6403	32.7998	1.53348	2.01388
PALM2AKAP2	9	109498325	110172513	+	879.282	156.876	93.4708	97.698	3.34326e-07	9.46382e-06	1.75611	0.812383	1.75611	138.779	79.0262	1.53104	2.01427
CXorf38	X	40626921	40647562	-	216.582	33.0313	23.3315	24.0647	3.31214e-07	9.45241e-06	1.75557	0.811935	1.75557	32.3711	18.4391	1.52877	2.016
ZFP36	19	39406847	39409413	+	716.267	118.017	76.166	79.5853	0.000374952	0.00313537	1.74854	0.806154	1.74854	105.575	60.3787	1.34447	2.27406
KIF9	3	47228026	47283452	-	45.0757	6.53726	4.80985	5.00841	0.000711418	0.00517607	1.74837	0.806007	1.74837	5.82409	3.33116	1.31029	2.3329
RALB	2	120240064	120294711	+	712.237	120.033	75.127	79.1374	8.82334e-10	5.86834e-08	1.74747	0.805267	1.74747	115.826	66.2821	1.60222	1.90588
BCRP3	22	24632915	24650013	+	16.4574	3.60297	1.61173	1.8286	0.0328454	0.102178	1.74295	0.801535	1.74295	2.76813	1.58818	-1.04026	3.1602
RMC1	18	23503470	23531823	+	135.852	21.3164	14.641	15.0946	1.41668e-05	0.000217205	1.74254	0.80119	1.74254	19.7572	11.3382	1.44431	2.10235
PHLDB2	3	111732497	111976518	+	836.15	135.746	88.8056	92.9056	1.35671e-09	8.54847e-08	1.74187	0.800634	1.74187	133.475	76.6276	1.59323	1.90437
NBN	8	89933331	90003229	-	814.675	126.16	87.8585	90.5195	4.90425e-09	2.54348e-07	1.74181	0.800587	1.74181	121.578	69.7997	1.57963	1.92064
CAPS2	12	75275979	75390929	-	14.9839	2.23188	1.58613	1.66488	0.0156156	0.0585575	1.74111	0.800011	1.74111	1.93227	1.10979	1.09369	2.77178
KIAA1217	10	23694746	24547849	+	282.883	44.1364	30.5962	31.4315	3.5188e-07	9.85402e-06	1.73308	0.79334	1.73308	39.809	22.97	1.51531	1.98215
ITGA4	2	181457202	181538941	+	10.806	2.14864	1.02256	1.20067	0.0688711	0.175831	1.73281	0.793113	1.73281	1.7689	1.02083	-1.33793	4.01731
DOCK10	2	224765090	225042446	-	280.691	44.6466	29.941	31.1879	1.69295e-08	7.50855e-07	1.72479	0.786419	1.72479	44.2569	25.6593	1.55183	1.91703
MIR4435-2HG	2	111006015	111523377	-	399.564	68.1774	42.6587	44.396	7.00213e-06	0.000119327	1.72387	0.785648	1.72387	61.5033	35.6775	1.45147	2.04739
PSMA5	1	109399042	109426449	-	552.557	83.039	59.8373	61.3952	1.69342e-08	7.50855e-07	1.72163	0.783771	1.72163	78.8625	45.807	1.55024	1.91196
TREX1	3	48465811	48467646	+	64.5703	9.77679	6.93857	7.17448	0.000440623	0.00355019	1.72018	0.78256	1.72018	8.67217	5.04143	1.32933	2.22596
AC012459.1	2	200390666	200478019	-	15.6386	2.81763	1.60767	1.73762	0.0506859	0.140108	1.71991	0.782336	1.71991	2.32177	1.34993	-1.04892	3.1028
DUSP10	1	221701424	221742090	-	28.9239	4.53584	3.10964	3.21377	0.00368265	0.0191823	1.71732	0.780155	1.71732	4.09867	2.38667	1.22172	2.41394
PSMA6	14	35278633	35317494	+	1068.34	160.564	115.504	118.704	1.66232e-09	1.04283e-07	1.7165	0.779469	1.7165	157.428	91.7145	1.57175	1.87457
ZFYVE28	4	2269582	2418652	-	73.8962	11.9851	7.86098	8.21069	0.00217793	0.0127513	1.71393	0.77731	1.71393	10.6978	6.24165	1.24059	2.36788
AC008105.3	17	45190931	45222223	-	50.9744	8.66367	5.3061	5.66382	0.00675337	0.0309865	1.71288	0.776427	1.71288	6.3443	3.70387	1.1544	2.54156
MREG	2	215942584	216034097	-	86.7661	13.3575	9.35627	9.64068	0.000156479	0.00155785	1.71105	0.774883	1.71105	12.0341	7.03315	1.36251	2.14876
NOD1	7	30424527	30478785	-	101.412	16.6603	10.8937	11.268	0.000100825	0.00108094	1.70779	0.772132	1.70779	15.1119	8.84882	1.37102	2.12728
DYNLT1	6	158636474	158644744	-	194.386	30.1822	21.0319	21.5984	2.06138e-07	6.27411e-06	1.70677	0.771272	1.70677	28.601	16.7573	1.50546	1.93501
AC104297.1	3	17871729	17872599	-	78.5858	12.6854	8.45439	8.73176	2.89953e-05	0.000389296	1.70511	0.769864	1.70511	11.9442	7.00497	1.40848	2.06421
MBOAT1	6	20099684	20212470	-	41.3763	6.36759	4.36271	4.59736	0.00895334	0.0383951	1.70451	0.769354	1.70451	5.34476	3.13566	1.15771	2.50957
AMER1	X	64185117	64205709	-	177.096	26.4295	19.1435	19.6773	2.03991e-06	4.25951e-05	1.70444	0.769294	1.70444	25.8911	15.1904	1.46312	1.98556
BCL2L11	2	111119378	111168446	+	424.078	71.2194	45.3603	47.1198	0.000268363	0.00240956	1.70365	0.768625	1.70365	61.8863	36.3258	1.34042	2.1653
BIRC3	11	102317450	102339404	+	423.925	66.8637	45.8881	47.1027	6.64375e-07	1.68332e-05	1.69983	0.765389	1.69983	58.9725	34.6932	1.48338	1.94785
HDAC4	2	239048168	239401655	-	566.771	87.3747	61.0747	62.9745	2.0905e-08	8.91159e-07	1.69909	0.76476	1.69909	85.3904	50.2566	1.53012	1.88671
RMI2	16	11249619	11381663	+	258.579	38.4623	27.9667	28.731	1.06427e-06	2.52778e-05	1.69584	0.762004	1.69584	34.6842	20.4525	1.47274	1.95275
PATL1	11	59636716	59669038	-	847.282	124.023	91.9429	94.1424	1.75558e-09	1.09655e-07	1.69575	0.761924	1.69575	119.687	70.5803	1.55562	1.84851
OTUD4	4	145110838	145180590	-	652.564	95.8875	70.7336	72.5071	3.64873e-09	1.98552e-07	1.69495	0.761239	1.69495	94.3516	55.6665	1.54708	1.85694
RNF31	14	24146683	24160661	+	625.018	87.0793	67.7055	69.4464	7.02687e-08	2.51741e-06	1.6939	0.76035	1.6939	85.0994	50.2387	1.51121	1.89868
HEXD	17	82418318	82442646	+	251.266	38.4528	27.1921	27.9184	4.05964e-06	7.44838e-05	1.69188	0.758625	1.69188	35.3703	20.9059	1.44579	1.97986
STK3	8	98371228	98942828	-	143.199	22.2319	15.4499	15.911	2.14117e-05	0.000306071	1.69029	0.75727	1.69029	20.9856	12.4154	1.40488	2.03368
CIR1	2	174348022	174395713	-	127.679	20.6766	13.8028	14.1866	1.09092e-05	0.000174524	1.68915	0.7563	1.68915	18.6779	11.0576	1.42269	2.00552
CD2AP	6	47477789	47627264	+	585.378	94.8146	62.9724	65.042	3.11045e-08	1.26228e-06	1.687	0.754457	1.687	88.9351	52.718	1.51685	1.87622
CCNB3	X	50202713	50351915	+	10.4426	1.67914	1.10889	1.16028	0.0400126	0.11813	1.6867	0.754207	1.6867	1.30976	0.776521	1.00207	2.83909
USP42	7	6104884	6161565	+	350.925	55.8997	38.026	38.9916	1.94021e-07	6.00714e-06	1.68626	0.753828	1.68626	50.4489	29.9176	1.49308	1.90444
RGS14	5	177357924	177372597	+	178.503	30.6489	19.0235	19.8337	0.000199169	0.00189613	1.68477	0.752548	1.68477	27.2081	16.1495	1.33643	2.1239
SLC30A7	1	100896076	100981758	+	257.223	42.8246	27.5408	28.5803	2.24022e-06	4.58663e-05	1.68459	0.752397	1.68459	39.57	23.4894	1.45015	1.95692
DDX23	12	48829756	48852843	-	1908.69	289.766	206.388	212.076	1.06771e-10	9.29616e-09	1.68412	0.751997	1.68412	283.768	168.496	1.57091	1.80549
AC012360.3	2	105334027	105337476	-	15.3183	2.40398	1.60922	1.70203	0.0325041	0.101369	1.68357	0.751524	1.68357	1.93468	1.14915	1.01486	2.7929
DNAH5	5	13690331	13944544	-	31.7681	6.28036	3.24746	3.52979	0.0226738	0.0774389	1.68117	0.749468	1.68117	5.16975	3.07509	1.0931	2.58563
C19orf12	19	29698886	29715790	-	465.36	72.1847	50.2706	51.7067	4.32286e-08	1.66494e-06	1.68112	0.749423	1.68112	69.2076	41.1676	1.50903	1.87284
AC135048.4	16	30984630	30988271	-	36.4883	6.80597	3.8252	4.05426	0.00554312	0.0264648	1.68055	0.748932	1.68055	5.81875	3.46241	1.19952	2.35447
VPS13C	15	61852389	62060474	-	843.25	135.375	90.6715	93.6945	2.00119e-07	6.11684e-06	1.67788	0.746637	1.67788	127.691	76.1027	1.48556	1.89509
ACSM3	16	20610243	20797582	+	50.2381	7.40035	5.4408	5.58201	0.000450492	0.00361551	1.67757	0.746376	1.67757	6.81133	4.06023	1.31338	2.14275
CYP4F12	19	15673018	15697175	+	18.684	3.40191	1.94517	2.076	0.0732834	0.184054	1.67614	0.745145	1.67614	2.31111	1.37883	1.01817	2.75932
ATP10A	15	25677271	25865185	-	567.133	88.6215	61.3404	63.0148	1.08327e-08	4.9879e-07	1.67512	0.744269	1.67512	83.942	50.1109	1.5211	1.84475
RMDN3	15	40735884	40755852	-	248.483	38.6998	26.8335	27.6093	3.31984e-07	9.45241e-06	1.67388	0.743192	1.67388	37.0552	22.1374	1.47593	1.89837
EGLN3	14	33924227	34462775	-	288.007	49.5443	30.9025	32.0008	2.12175e-06	4.39208e-05	1.67375	0.743083	1.67375	43.932	26.2477	1.44637	1.93688
AC009404.1	2	117833937	117841659	+	12.6663	1.91907	1.35751	1.40736	0.0324349	0.101208	1.67345	0.742823	1.67345	1.63303	0.97585	1.05022	2.66652
PSMA2	7	42916861	42932186	-	612.657	88.3259	66.5457	68.073	7.23127e-09	3.56991e-07	1.67229	0.741825	1.67229	86.4773	51.7119	1.52274	1.83653
C3orf14	3	62318973	62336214	+	57.3844	8.23409	6.16711	6.37604	0.00140117	0.00895828	1.67211	0.741671	1.67211	7.91441	4.73318	1.2426	2.25009
CTDSP2	12	57819927	57846730	-	759.236	119.761	82.262	84.3595	9.47533e-08	3.24101e-06	1.66918	0.739144	1.66918	109.709	65.7259	1.49106	1.86859
DNAJA1	9	33025273	33039908	+	2865.73	420.299	311.032	318.414	1.00617e-09	6.63057e-08	1.66657	0.736883	1.66657	412.019	247.226	1.5378	1.80612
ASAP3	1	23428563	23484569	-	72.1121	13.084	7.66586	8.01246	0.00087965	0.00614333	1.66455	0.735134	1.66455	11.1709	6.71103	1.28745	2.1521
FYTTD1	3	197737179	197787597	+	380.227	59.0521	41.0092	42.2475	5.53784e-07	1.44124e-05	1.66228	0.733163	1.66228	56.7858	34.1614	1.45955	1.89316
ARRDC3	5	91368631	91383318	-	271.469	41.5784	29.2272	30.1632	5.37397e-07	1.40167e-05	1.65568	0.727427	1.65568	41.0567	24.7974	1.45607	1.88266
RBM7	11	114400030	114414204	+	135.81	21.6357	14.6208	15.09	7.29323e-05	0.000830884	1.6522	0.72439	1.6522	20.1344	12.1864	1.35425	2.01571
INO80B-WBP1	2	74455088	74460885	+	37.2293	12.5763	3.24912	4.13659	0.945038	0.974087	1.65202	0.724228	1.65202	5.60123	3.39054	-1.58471	4.32494
MIR4453HG	4	152536264	152539264	+	12.827	2.13689	1.3758	1.42522	0.0380828	0.113884	1.65064	0.723029	1.65064	1.72508	1.04509	1.02048	2.66995
SPTSSA	14	34432788	34462241	-	363.229	57.2202	39.2917	40.3588	8.62981e-07	2.10485e-05	1.64995	0.722419	1.64995	53.2752	32.289	1.44589	1.88279
PTPN2P1	1	178746683	178747755	-	13.8302	2.40398	1.43836	1.53669	0.0635071	0.165369	1.64934	0.721886	1.64934	1.93924	1.17577	-1.08954	2.96388
ATP5F1AP3	16	72005037	72006544	-	15.0169	2.27174	1.59243	1.66855	0.0407882	0.119829	1.64831	0.720985	1.64831	2.05081	1.24419	-1.00639	2.73427
FAM111A	11	59142748	59155040	+	399.472	56.9813	43.3273	44.3858	1.25394e-06	2.89388e-05	1.64573	0.718728	1.64573	53.5872	32.5613	1.43619	1.88584
TBC1D32	6	121079494	121334746	-	16.6523	2.58205	1.75708	1.85026	0.0409111	0.120092	1.64519	0.718252	1.64519	2.32238	1.41162	-1.0162	2.75049
CEBPD	8	47736913	47738165	-	563.008	83.8038	60.8954	62.5564	1.01069e-05	0.000163692	1.64449	0.717644	1.64449	75.3635	45.8277	1.39551	1.9379
AL122020.1	14	90766531	90766990	+	10.4418	1.85851	1.10901	1.1602	0.0733812	0.184244	1.64167	0.715164	1.64167	1.39848	0.851866	-1.06017	2.85725
TEC	4	48135783	48269839	-	14.4863	2.49302	1.47922	1.60958	0.0910087	0.214791	1.64159	0.715093	1.64159	2.02108	1.23117	-1.17048	3.15423
SCO2	22	50523568	50526462	-	241.948	36.7979	26.2037	26.8831	4.99234e-06	8.85432e-05	1.63985	0.713568	1.63985	34.9653	21.3222	1.40765	1.91036
AC114490.2	1	34981533	35031742	-	26.8975	4.30999	2.75617	2.98862	0.042312	0.122824	1.63761	0.711593	1.63761	3.94058	2.4063	-1.07055	2.87097
RHBDF2	17	76470891	76501791	-	1035.6	173.492	111.027	115.067	2.66418e-08	1.11585e-06	1.63665	0.710745	1.63665	159.216	97.2818	1.48296	1.80626
PPAN-P2RY11	19	10106223	10114781	+	36.6083	7.11447	3.6152	4.06759	0.0951096	0.222042	1.63657	0.710674	1.63657	5.39649	3.29744	-1.19337	3.19626
RIPK2	8	89757806	89791065	+	553.406	88.3204	59.9351	61.4896	1.2477e-07	4.05531e-06	1.63461	0.708946	1.63461	81.1106	49.6208	1.4635	1.82572
LINC01117	2	176495255	176819181	+	12.0436	1.97809	1.29131	1.33818	0.0395251	0.117124	1.6343	0.708669	1.6343	1.81277	1.10921	1.0255	2.60452
ATXN7	3	63863867	64003463	+	229.784	31.8311	24.9898	25.5315	1.13337e-06	2.66919e-05	1.63183	0.706487	1.63183	31.2196	19.1317	1.4289	1.86358
CNNM2	10	102918294	103090223	+	203.957	30.034	22.1566	22.6619	2.81476e-06	5.48723e-05	1.63084	0.705612	1.63084	28.9573	17.7561	1.41335	1.88179
CYTOR	2	87454781	87636741	+	351.624	59.8109	37.7741	39.0694	3.49771e-05	0.000453117	1.63054	0.705352	1.63054	52.538	32.2212	1.36353	1.94984
BEX2	X	103309346	103311047	-	12.436	2.40398	1.23545	1.38178	0.111033	0.24711	1.63033	0.70516	1.63033	1.73115	1.06184	-1.33275	3.54238
MBD4	3	129430944	129440180	-	186.744	26.4428	20.3236	20.7493	1.31708e-06	2.99536e-05	1.6285	0.703545	1.6285	26.0511	15.997	1.42434	1.86193
ZNF215	11	6926404	7001005	+	16.4624	3.07933	1.73653	1.82916	0.0652817	0.168554	1.62827	0.703339	1.62827	2.13549	1.31151	-1.01341	2.6868
SLC5A4-AS1	22	32205115	32278383	+	46.6541	8.33702	4.97783	5.18379	0.0124065	0.0492351	1.62682	0.702053	1.62682	6.38832	3.92688	1.13305	2.33576
KDM7A	7	140084746	140176984	-	45.1309	9.15881	4.64719	5.01454	0.0166302	0.0615744	1.62605	0.701371	1.62605	7.28748	4.48171	1.1224	2.3557
DNAAF4-CCPG1	15	55355248	55498361	-	34.6516	7.29413	2.88824	3.85017	0.12912	0.275073	1.62534	0.700737	1.62534	5.79897	3.56786	-1.6408	4.33452
KCND1	X	48961378	48971845	-	27.0954	5.32088	2.8786	3.0106	0.0296644	0.0949127	1.62378	0.699352	1.62378	3.78829	2.33301	1.05854	2.49083
ICOSLG	21	44217014	44240967	-	110.583	18.5117	11.7599	12.287	0.000152833	0.00152684	1.62232	0.698054	1.62232	17.2076	10.6068	1.3192	1.99508
AC009133.1	16	29808636	29821253	-	82.9888	13.6877	8.94419	9.22097	0.00166052	0.0102163	1.62069	0.696605	1.62069	11.781	7.26914	1.24631	2.10752
DNAJC1	10	21756548	22003770	-	314.538	48.9466	34.1305	34.9487	3.74374e-07	1.03433e-05	1.61937	0.695431	1.61937	45.64	28.1838	1.43805	1.82354
CASP10	2	201182898	201229407	+	77.0243	11.4362	8.38484	8.55826	9.255e-05	0.00101339	1.61911	0.695197	1.61911	10.6826	6.59784	1.33505	1.96359
LIFR	5	38474668	38608355	-	91.2644	14.9403	9.82574	10.1405	0.000462792	0.00368745	1.61526	0.691765	1.61526	13.4816	8.3464	1.28548	2.02964
AC016687.1	4	33968174	33968527	+	16.0817	2.67108	1.72638	1.78685	0.0363399	0.109953	1.61493	0.691473	1.61493	2.16766	1.34226	1.02954	2.53317
KDM7A-DT	7	140177184	140179641	+	22.2766	3.82851	2.31181	2.47518	0.0490194	0.136396	1.61434	0.690947	1.61434	3.38321	2.09572	-1.01919	2.65613
EHF	11	34621093	34661058	+	73.4941	13.449	7.8816	8.16601	0.0034902	0.0183721	1.61259	0.689378	1.61259	10.5964	6.57103	1.20347	2.16078
CDC42EP4	17	73283624	73312006	-	970.941	148.894	105.579	107.882	9.76494e-08	3.32425e-06	1.6116	0.688497	1.6116	137.614	85.3896	1.45038	1.79075
STARD4	5	111496033	111512591	-	100.436	13.9928	10.8364	11.1595	8.4767e-05	0.000943271	1.61093	0.687891	1.61093	12.5472	7.78882	1.32872	1.95307
ABCB1	7	87503017	87713324	-	313.292	44.3108	34.0248	34.8102	1.2494e-05	0.000195242	1.60903	0.686194	1.60903	42.6284	26.4931	1.3729	1.88578
HLA-DMA	6	32948613	32969095	-	32.073	5.84423	3.35057	3.56366	0.0350069	0.107093	1.60738	0.684715	1.60738	4.93535	3.07042	1.05966	2.43822
MIR210HG	11	565660	568458	-	26.2294	4.01249	2.8249	2.91438	0.0122072	0.0487406	1.60562	0.683127	1.60562	3.77338	2.35011	1.1215	2.29871
KIF2A	5	62306162	62537250	+	690.032	107.091	74.7608	76.6703	3.32613e-08	1.34223e-06	1.60546	0.682984	1.60546	101.482	63.2107	1.45787	1.76799
BCL6	3	187721377	187745726	-	94.3313	16.573	9.70788	10.4813	0.00123056	0.00804284	1.60534	0.682876	1.60534	15.4877	9.64762	1.24142	2.07593
BAK1	6	33572547	33580294	-	292.181	45.3573	31.5513	32.4646	1.3288e-06	3.01573e-05	1.60183	0.679718	1.60183	43.5212	27.1697	1.40835	1.82188
NDST2	10	73801911	73811799	-	183.986	31.3365	19.6326	20.4429	6.67484e-05	0.000773937	1.59942	0.677546	1.59942	28.2692	17.6747	1.32893	1.92495
IFNAR2	21	33229901	33265676	+	226.371	35.6726	24.5036	25.1523	3.02296e-06	5.83708e-05	1.59767	0.675967	1.59767	33.3265	20.8595	1.39333	1.83198
ISY1-RAB43	3	129087575	129161037	-	176.544	28.7076	18.9972	19.616	0.00035778	0.0030199	1.59673	0.675118	1.59673	25.8682	16.2008	1.2855	1.98331
ECI2	6	4115689	4135598	-	232.359	38.2166	25.1031	25.8177	1.09921e-05	0.000175264	1.5943	0.672926	1.5943	34.3247	21.5296	1.36836	1.85755
FMR1	X	147911919	147951126	+	385.712	54.3444	42.0443	42.8569	2.55016e-07	7.59329e-06	1.59428	0.672904	1.59428	52.3618	32.8435	1.42617	1.7822
PCYT1A	3	196214222	196287958	-	808.521	127.138	86.9338	89.8357	6.18219e-09	3.09454e-07	1.59205	0.670881	1.59205	123.055	77.2938	1.46445	1.73076
FGL1	8	17864380	17910366	-	136.008	20.8471	14.4837	15.112	0.0126142	0.0498391	1.59159	0.670467	1.59159	17.9673	11.2889	1.13833	2.22532
AL136295.1	14	24189157	24213474	-	55.3955	16.4896	4.98524	6.15506	0.37431	0.563543	1.59094	0.669883	1.59094	8.63766	5.42926	-1.50036	3.79758
RARS1	5	168486451	168519302	+	976.599	140.346	106.398	108.511	9.54042e-09	4.55341e-07	1.59035	0.669342	1.59035	137.888	86.7032	1.45878	1.73379
DUSP16	12	12473282	12562864	-	838.024	117.845	90.6771	93.1138	4.77605e-06	8.52332e-05	1.58963	0.668692	1.58963	106.218	66.8195	1.37903	1.83239
AC104996.2	17	30068632	30069632	+	11.8232	2.01285	1.24382	1.31369	0.126879	0.271975	1.5896	0.668661	1.5896	1.67283	1.05236	-1.12708	2.84792
CYP1B1	2	38066973	38109903	-	1207.45	169.842	131.768	134.161	2.4102e-09	1.46097e-07	1.58762	0.666865	1.58762	164.887	103.858	1.46939	1.71536
SPATS2L	2	200305881	200482265	+	1312.12	199.438	142.63	145.791	1.07744e-07	3.60804e-06	1.58667	0.666001	1.58667	187.986	118.478	1.43101	1.75926
AP001527.2	11	102109827	102110458	-	14.5836	2.37881	1.53777	1.6204	0.0661156	0.170353	1.58628	0.665645	1.58628	2.02922	1.27924	-1.08698	2.73515
AL136295.4	14	24180395	24190417	-	20.983	3.88834	1.90592	2.33145	0.0911849	0.214995	1.58592	0.665319	1.58592	2.70699	1.70689	-1.75558	4.41552
DGLUCY	14	91060333	91225633	+	223.142	31.707	24.3094	24.7936	5.51801e-06	9.67594e-05	1.58492	0.664407	1.58492	30.0797	18.9787	1.37428	1.82784
AC017083.3	2	68131238	68261231	-	41.9848	7.3497	4.48905	4.66498	0.0138107	0.0536083	1.58382	0.663409	1.58382	5.87247	3.70779	1.10043	2.27955
ZNF296	19	45071500	45076588	-	219.386	33.9216	23.8146	24.3763	1.88364e-05	0.000274446	1.58333	0.662964	1.58333	31.3368	19.7917	1.34968	1.85744
NUP50-DT	22	45133020	45163782	-	19.2185	3.47667	1.973	2.13539	0.100586	0.231092	1.58294	0.662603	1.58294	2.74348	1.73316	-1.15685	2.8987
DENND1A	9	123379654	123930153	-	495.727	77.1079	53.9152	55.0807	1.17806e-07	3.87277e-06	1.58255	0.662252	1.58255	71.1408	44.9532	1.42774	1.75414
AK4	1	65147549	65232146	+	720.882	109.247	78.2116	80.098	7.27341e-07	1.82453e-05	1.58074	0.660603	1.58074	104.398	66.0437	1.40329	1.78064
USP15	12	62260338	62417432	+	381.589	57.9604	41.48	42.3988	1.56133e-06	3.42967e-05	1.58067	0.660539	1.58067	54.4469	34.4454	1.39116	1.79601
MAGOHB	12	10604193	10613610	-	97.0377	15.3137	10.5363	10.782	0.000453034	0.00363109	1.58033	0.660228	1.58033	12.9028	8.16463	1.27582	1.95752
NRG1	8	31639222	32855667	+	1264.53	222.226	134.833	140.504	3.81509e-06	7.09024e-05	1.57968	0.659635	1.57968	195.148	123.536	1.37921	1.80929
AC023024.2	15	101299656	101301649	-	28.4191	5.51939	2.90677	3.15768	0.0152513	0.057567	1.57788	0.65799	1.57788	4.66961	2.95942	1.0941	2.27557
TNFRSF10A-AS1	8	23189279	23190676	+	10.0026	1.63987	1.00776	1.1114	0.0795633	0.195316	1.57788	0.657986	1.57788	1.19321	0.75621	-1.27554	3.17572
PDZK1IP1	1	47183582	47191045	-	13.9266	2.7041	1.33585	1.5474	0.0924675	0.217128	1.5765	0.656728	1.5765	2.40742	1.52706	-1.09714	2.7268
SHISA5	3	48467798	48504827	-	2635.44	367.049	287.698	292.827	1.05265e-09	6.87383e-08	1.57633	0.65657	1.57633	352.727	223.765	1.46736	1.69339
TRO	X	54920462	54931432	+	12.9744	2.10434	1.33767	1.44161	0.0704658	0.178538	1.57365	0.654114	1.57365	1.78995	1.13745	-1.18891	2.94419
TCF4	18	55222185	55664788	-	52.3156	8.02487	5.58501	5.81285	0.00471285	0.0233304	1.57218	0.652771	1.57218	7.81621	4.97156	1.15301	2.14375
CP	3	149162410	149221830	-	472.762	74.8371	50.7063	52.5292	0.00362203	0.0189009	1.57181	0.652428	1.57181	62.4221	39.7135	1.19541	2.06672
MYH3	17	10628526	10657310	-	13.3528	2.10434	1.42538	1.48364	0.0710106	0.179444	1.57091	0.651603	1.57091	1.93352	1.23082	-1.04678	2.58321
PRKCQ-AS1	10	6580419	6616922	+	84.8058	12.1245	9.23259	9.42286	0.000210055	0.00197612	1.56933	0.650147	1.56933	11.8642	7.56003	1.28482	1.91683
ZNF391	6	27374615	27403905	+	9.68012	1.39571	1.01319	1.07557	0.0864089	0.207168	1.56911	0.649947	1.56911	1.30856	0.833948	-1.20335	2.96277
AC069288.1	7	1815804	2242216	-	36.5293	8.18722	2.70389	4.05881	0.104465	0.23686	1.56849	0.649377	1.56849	4.70857	3.00197	-3.16885	7.7959
AC073569.2	12	79690144	79778452	+	13.4357	2.82685	1.33957	1.49286	0.18969	0.357775	1.56766	0.648616	1.56766	1.76668	1.12695	-1.34751	3.3116
AC125807.2	12	3041437	3044951	+	119.517	18.9641	13.0084	13.2796	8.53804e-05	0.000949362	1.56374	0.644997	1.56374	16.7989	10.7428	1.30856	1.86867
GALT	9	34638133	34651036	+	149.167	22.4149	16.145	16.5741	7.7932e-05	0.000878021	1.56254	0.643893	1.56254	21.7157	13.8977	1.30585	1.86968
BPGM	7	134646811	134679817	+	96.4869	14.0894	10.5245	10.7208	9.79112e-05	0.00105838	1.56245	0.643811	1.56245	13.329	8.53081	1.30464	1.87121
NR1D1	17	40092793	40100590	-	187.135	28.2239	20.3938	20.7928	3.2743e-06	6.1893e-05	1.56218	0.64356	1.56218	26.5219	16.9775	1.36984	1.78153
TMEM140	7	135148072	135166216	+	400.923	60.2304	43.6731	44.547	1.24405e-06	2.88724e-05	1.56195	0.643349	1.56195	56.5069	36.1771	1.38485	1.7617
LARS2	3	45388561	45554727	+	330.518	50.5708	36.0105	36.7243	1.00522e-05	0.00016299	1.56189	0.643296	1.56189	45.1037	28.8776	1.35186	1.80456
SH2B3	12	111405923	111451624	+	133.873	20.7447	14.493	14.8747	0.000215751	0.00202316	1.56083	0.642311	1.56083	19.3577	12.4022	1.28481	1.89614
C21orf91	21	17788974	17819387	-	38.9265	6.80372	4.21326	4.32517	0.00725808	0.0327583	1.55933	0.640926	1.55933	5.51409	3.53619	1.15399	2.10705
AL356056.2	10	46580708	46598151	-	86.3392	14.1544	9.28977	9.59325	0.00422141	0.0213538	1.55869	0.640338	1.55869	11.0923	7.1164	1.17686	2.06441
KARS1	16	75627474	75648644	-	1635.04	233.476	178.486	181.672	2.7545e-09	1.5892e-07	1.55838	0.640051	1.55838	228.466	146.604	1.44568	1.67988
CALM3	19	46601074	46610783	+	5288.46	761.753	577.526	587.607	5.88725e-09	3.0003e-07	1.5577	0.639414	1.5577	730.314	468.842	1.43923	1.68592
ERI1	8	9002147	9116747	+	335.893	53.5977	36.5037	37.3214	1.81148e-05	0.000265007	1.55665	0.638441	1.55665	47.5489	30.5457	1.33769	1.81144
FP236241.2	21	7669397	7681743	-	123.889	20.1529	13.1571	13.7655	0.0104571	0.0432467	1.55647	0.638275	1.55647	15.9803	10.267	1.10234	2.19768
STX17	9	99906654	99974535	+	264.596	36.1116	28.8735	29.3995	4.53013e-06	8.14516e-05	1.55427	0.636239	1.55427	35.5034	22.8425	1.35902	1.77758
FANCF	11	22622533	22625824	-	256.248	37.2051	27.9807	28.4721	1.77691e-06	3.80433e-05	1.55382	0.635817	1.55382	35.1625	22.6298	1.37302	1.75842
RPS18P9	6	149592687	149601879	+	15.5179	3.14216	1.62825	1.72422	0.0871146	0.208559	1.55082	0.63303	1.55082	2.21068	1.42549	-1.11449	2.68039
LRP5L	22	25351418	25405378	-	22.7768	4.09971	2.36235	2.53075	0.09341	0.218947	1.55028	0.632526	1.55028	3.4455	2.22251	-1.07328	2.57947
KPNA5	6	116681187	116741868	+	28.5627	4.30007	3.06955	3.17364	0.0217275	0.075087	1.54657	0.629071	1.54657	4.01735	2.59759	1.05765	2.26151
TM4SF5	17	4771884	4783214	+	17.8296	3.34776	1.79837	1.98107	0.177267	0.341781	1.54532	0.627907	1.54532	1.92646	1.24664	-1.13428	2.70869
ANKFY1	17	4163821	4263996	-	1267.6	182.039	138.534	140.845	8.54198e-09	4.10415e-07	1.54376	0.626451	1.54376	174.675	113.149	1.42527	1.67211
NAV1	1	201622885	201826970	+	487.698	83.1637	52.4927	54.1886	3.04343e-06	5.8687e-05	1.54371	0.626399	1.54371	73.1415	47.3804	1.35998	1.75226
AC025588.1	19	57175233	57177922	+	9.81976	1.73839	1.0131	1.09108	0.134811	0.282728	1.54255	0.625321	1.54255	1.43355	0.929338	-1.26555	3.01134
LRRC73	6	43506969	43510687	-	11.643	1.92136	1.20189	1.29366	0.1027	0.234188	1.54243	0.625204	1.54243	1.60964	1.04358	-1.2354	2.93912
MUC13	3	124905442	124953820	-	92.5126	14.3208	9.97044	10.2792	0.00223349	0.0130303	1.54219	0.624979	1.54219	11.4684	7.43648	1.20627	1.97166
ACTA2	10	88935074	88991340	-	204.965	34.2514	21.9872	22.7739	0.000914366	0.00633661	1.54122	0.62407	1.54122	30.2695	19.64	1.23178	1.92838
KCNQ3	8	132120859	132481096	-	12.7139	2.84915	1.1209	1.41265	0.102214	0.233518	1.53807	0.621117	1.53807	2.28943	1.48851	-1.17793	2.78657
BTF3P10	6	149977922	149978417	+	17.8526	2.69222	1.90018	1.98363	0.0499689	0.138528	1.53771	0.620781	1.53771	2.35173	1.52937	-1.05159	2.48653
NR0B1	X	30304206	30309391	-	515.356	73.1826	56.0145	57.2618	6.6749e-06	0.000114703	1.53753	0.620614	1.53753	65.1551	42.3765	1.34289	1.76038
SMG7-AS1	1	183460874	183472266	-	13.0536	2.37051	1.35962	1.45041	0.0641654	0.1666	1.53749	0.620579	1.53749	1.39677	0.908474	-1.04362	2.46699
PLEKHG6	12	6310436	6328507	+	14.0806	2.67108	1.34703	1.56451	0.0790838	0.194541	1.536	0.619177	1.536	2.43502	1.5853	-1.08725	2.56513
STS	X	7147237	7804359	+	242.276	37.4199	26.236	26.9196	0.00124647	0.00813574	1.53586	0.61905	1.53586	33.1597	21.5902	1.22744	1.92179
VPS54	2	63892146	64019429	-	316.355	44.9212	34.5696	35.1505	2.11054e-06	4.37519e-05	1.53497	0.618212	1.53497	42.7506	27.8511	1.35831	1.73462
ITPRIPL2	16	19113932	19121630	+	949.277	142.788	103.177	105.475	1.24991e-06	2.89388e-05	1.5338	0.617114	1.5338	136.177	88.7838	1.365	1.72349
SIN3B	19	16829400	16880354	+	424.77	63.9507	45.8724	47.1967	3.4449e-07	9.70382e-06	1.53043	0.613939	1.53043	63.232	41.3164	1.37896	1.69855
GSTO1	10	104235356	104267460	+	400.06	55.5564	43.7047	44.4512	1.16323e-06	2.72165e-05	1.52987	0.613409	1.52987	55.066	35.9939	1.36357	1.71645
PRKD2	19	46674275	46717128	-	768.288	106.951	83.9846	85.3653	3.3265e-07	9.45241e-06	1.52876	0.612361	1.52876	103.481	67.6898	1.37758	1.69652
MTUS1	8	17643795	17800918	-	2921.52	414.148	317.242	324.613	4.89167e-05	0.000597472	1.52821	0.611841	1.52821	373.391	244.332	1.30081	1.79536
MICB	6	31494881	31511125	+	125.317	17.4435	13.6528	13.9241	0.000266114	0.00239087	1.52653	0.610254	1.52653	16.4625	10.7843	1.25798	1.85241
TVP23C-CDRT4	17	15436021	15563562	-	31.0557	7.5488	2.75193	3.45063	0.376616	0.56589	1.52594	0.6097	1.52594	4.85886	3.18417	-1.66151	3.86883
PMP22	17	15229777	15265327	-	320.698	49.8926	34.9293	35.6331	8.12591e-05	0.000908458	1.52568	0.609449	1.52568	43.7221	28.6575	1.29244	1.80101
C7orf25	7	42908726	42912306	-	28.6247	4.4682	3.08048	3.18052	0.0261993	0.0863083	1.52476	0.608586	1.52476	3.59571	2.35821	1.05741	2.19867
OSBPL10	3	31657890	32077581	-	184.166	26.0744	20.1018	20.4628	5.49666e-05	0.00065914	1.52458	0.608416	1.52458	24.7553	16.2374	1.29761	1.79127
RCN1P2	13	45390353	45391268	-	512.632	75.7146	55.8066	56.9591	3.19763e-07	9.24288e-06	1.52364	0.60752	1.52364	73.4175	48.1857	1.37484	1.68854
PLCH1	3	155375580	155745068	-	253.156	34.9777	27.6495	28.1284	1.5425e-05	0.000233013	1.52362	0.6075	1.52362	33.7241	22.1342	1.32024	1.75832
LINC02609	1	90769086	90851659	-	11.0127	1.74462	1.13157	1.22363	0.133904	0.281804	1.522	0.605966	1.522	1.66555	1.09432	-1.23345	2.85726
PSMB2	1	35599541	35641527	-	1287.38	179.581	140.874	143.042	2.70613e-08	1.12739e-06	1.5215	0.605493	1.5215	171.682	112.838	1.39864	1.65515
SDSL	12	113422380	113438277	+	188.147	30.3743	19.884	20.9052	0.00631582	0.0293318	1.52141	0.605412	1.52141	28.4044	18.6697	1.13801	2.03399
CNP	17	41966763	41977741	+	1428.72	202.104	156.305	158.747	1.30215e-08	5.91986e-07	1.52046	0.604508	1.52046	195.663	128.687	1.40403	1.64655
UBE2O	17	76389456	76453153	-	838.836	123.754	91.6136	93.2039	2.02242e-06	4.23528e-05	1.52039	0.60444	1.52039	114.31	75.1847	1.34942	1.71302
ZNF277	7	112206695	112343935	+	105.423	16.115	11.4633	11.7136	0.000461178	0.00367867	1.52	0.604075	1.52	14.8528	9.77155	1.24128	1.86131
IL6ST	5	55935095	55995023	-	1872.01	274.032	203.273	208.001	8.77477e-08	3.03025e-06	1.51952	0.603618	1.51952	271.696	178.804	1.38529	1.66676
CUL2	10	35008551	35090643	-	333.063	50.5911	36.4055	37.007	1.55537e-06	3.42182e-05	1.51927	0.603381	1.51927	45.8651	30.1888	1.35376	1.70502
AC120114.3	16	29913144	29915338	-	12.5435	1.97544	1.32746	1.39373	0.123166	0.266556	1.51922	0.603335	1.51922	1.62976	1.07276	-1.15355	2.66244
UHMK1	1	162497251	162529632	+	1424.56	209.252	154.931	158.285	2.9982e-07	8.70143e-06	1.518	0.602172	1.518	204.494	134.713	1.37111	1.68062
IL13RA1	X	118727133	118794536	+	882.048	127.35	96.1721	98.0053	1.67812e-06	3.64535e-05	1.51567	0.599959	1.51567	123.728	81.6322	1.34913	1.70278
RPS15AP1	20	21166206	21166597	-	29.5493	4.91989	3.17177	3.28325	0.0380999	0.113888	1.51551	0.599806	1.51551	4.07999	2.69215	1.02147	2.24849
CGAS	6	73413515	73452298	-	35.2575	6.01868	3.72432	3.9175	0.036641	0.110585	1.51537	0.599674	1.51537	5.01007	3.30616	-1.03558	2.37806
SLC10A4	4	48483343	48489527	+	50.0301	7.47885	5.45315	5.5589	0.00337226	0.0178899	1.51469	0.59902	1.51469	6.77933	4.47573	1.1686	1.96328
PKDCC	2	42048021	42058518	+	946.702	147.572	102.452	105.189	4.24382e-06	7.7173e-05	1.51342	0.597816	1.51342	138.429	91.4675	1.33451	1.71632
NDUFA9	12	4649095	4694318	+	465.817	62.8469	50.8604	51.7575	3.60732e-07	1.00237e-05	1.5134	0.597794	1.5134	59.1985	39.1162	1.3668	1.67572
PDK4	7	95583499	95596517	-	130.458	17.6574	14.1985	14.4953	0.000280703	0.00249541	1.5127	0.597129	1.5127	16.5837	10.963	1.25247	1.827
LYSMD2	15	51723011	51751586	-	160.134	24.4276	17.4172	17.7927	0.000958071	0.00658548	1.51259	0.597018	1.51259	21.1771	14.0006	1.22706	1.86455
AC019069.1	2	74832655	74833988	-	10.3699	1.60269	1.04496	1.15222	0.107862	0.242258	1.51231	0.596758	1.51231	1.21724	0.804884	-1.33743	3.05882
SERTAD1	19	40421589	40425993	-	241.75	35.4978	26.3055	26.8611	2.2724e-06	4.63712e-05	1.51188	0.596343	1.51188	34.799	23.0171	1.34331	1.7016
KRT8P13	3	170495627	170496637	+	13.0872	1.95882	1.41127	1.45413	0.0688286	0.175796	1.51106	0.595556	1.51106	1.72245	1.1399	-1.07406	2.45239
AC133644.2	2	87455476	87767360	+	33.5014	6.51025	3.47962	3.72238	0.0261173	0.0861935	1.51047	0.595001	1.51047	5.29316	3.50431	1.05754	2.15739
DNAJA1P3	X	107351650	107352844	-	103.804	15.2823	11.3155	11.5337	0.000249156	0.00226686	1.50664	0.591335	1.50664	14.5752	9.674	1.25255	1.81227
VCPIP1	8	66628487	66667232	-	292.73	43.3658	31.8978	32.5255	3.43567e-06	6.45358e-05	1.50657	0.591272	1.50657	41.6118	27.6201	1.3343	1.70109
TFPI	2	187464230	187565761	-	313.993	53.3379	33.5065	34.8881	0.000427215	0.00347333	1.50648	0.591183	1.50648	47.4162	31.4748	1.24158	1.8279
HSPA8P8	7	10451311	10453253	+	12.0326	2.23988	1.25802	1.33696	0.198868	0.369812	1.5062	0.59091	1.5062	1.56071	1.03619	-1.2149	2.75615
ANGPTL4	19	8363289	8374371	+	281.387	45.532	30.6461	31.2653	0.000125755	0.00130065	1.50612	0.590839	1.50612	38.811	25.7688	1.27104	1.78468
GUCD1	22	24540423	24555936	-	849.295	125.065	92.7365	94.3661	1.95606e-07	6.01728e-06	1.50609	0.590808	1.50609	118.994	79.0085	1.36843	1.6576
TRIM44	11	35662775	35818008	+	1483.21	209.604	162.164	164.801	1.454e-08	6.52757e-07	1.50356	0.58838	1.50356	206.465	137.318	1.39046	1.62585
AC009093.9	16	29075022	29104163	+	15.511	3.07206	1.55518	1.72344	0.0949592	0.22178	1.50124	0.586151	1.50124	1.47392	0.981802	-1.05921	2.38716
FBXL5	4	15604381	15681680	-	221.325	30.5574	24.1887	24.5916	3.14368e-05	0.000416428	1.50099	0.585914	1.50099	30.1055	20.0571	1.29479	1.74003
TMEM150A	2	85598547	85603197	-	146.81	22.4171	15.7672	16.3122	0.000402914	0.00331896	1.49864	0.583657	1.49864	21.8886	14.6056	1.23784	1.81439
ADPRS	1	36088892	36093933	+	282.116	44.6055	30.577	31.3462	1.97161e-05	0.000285815	1.49856	0.583575	1.49856	41.0226	27.3747	1.30352	1.72278
BAZ1A	14	34752731	34875648	-	845.159	123.405	92.2981	93.9066	3.53811e-08	1.41584e-06	1.49821	0.583237	1.49821	119.015	79.4383	1.37913	1.62757
PDK1	2	172555373	172608670	+	96.1767	16.4981	10.389	10.6863	0.0036513	0.019026	1.49735	0.582413	1.49735	13.6805	9.13649	1.16147	1.93037
MYL6P3	10	65169438	65169870	-	17.8277	2.4703	1.93547	1.98085	0.0482061	0.13497	1.49633	0.581433	1.49633	2.40983	1.61049	-1.00391	2.24777
MET	7	116672196	116798387	+	3763.34	534.348	412.07	418.149	2.47753e-09	1.48921e-07	1.4957	0.580823	1.4957	517.148	345.756	1.39805	1.60017
NCOA7	6	125781161	125932035	+	799.104	106.257	87.0399	88.7894	2.25593e-05	0.000318357	1.49495	0.580093	1.49495	100.914	67.5034	1.29557	1.72501
TENT5A	6	81491439	81752775	-	70.919	9.9501	7.66904	7.87989	0.00310399	0.0167702	1.49426	0.57943	1.49426	8.62463	5.77184	1.16706	1.91319
CLEC2D	12	9664969	9699554	+	17.9899	2.69521	1.95085	1.99888	0.0482621	0.135077	1.49223	0.57747	1.49223	2.2662	1.51867	-1.00002	2.22679
EBF4	20	2692874	2760109	+	53.3901	10.5213	5.45254	5.93223	0.0281651	0.0911511	1.49192	0.577174	1.49192	8.58477	5.75416	1.06288	2.09416
CICP7	1	487101	489907	+	29.5473	4.33853	3.2108	3.28304	0.0206043	0.07202	1.49065	0.575938	1.49065	3.72107	2.49628	1.07923	2.05889
SLCO5A1	8	69667046	69834979	-	12.1628	2.01285	1.15986	1.35142	0.153886	0.309583	1.4903	0.5756	1.4903	1.61408	1.08306	-1.70524	3.78732
AC010789.1	10	101701994	101730038	-	12.489	2.31495	1.30128	1.38767	0.233713	0.412169	1.48973	0.575052	1.48973	1.63337	1.09642	-1.26062	2.79769
AC008695.1	5	131425891	131796984	-	26.096	5.70685	2.47901	2.89955	0.295455	0.482729	1.48959	0.574917	1.48959	3.08763	2.0728	-1.5476	3.43394
ATP11C	X	139726346	139945277	-	269.202	36.7222	29.5056	29.9114	1.7258e-06	3.72264e-05	1.48894	0.574286	1.48894	35.4572	23.8137	1.3322	1.66412
FASTKD3	5	7859159	7869038	-	73.4737	11.6634	7.95622	8.16374	0.00917855	0.0391506	1.48825	0.57362	1.48825	9.52869	6.4026	1.12348	1.97145
ATP6V1C2	2	10721100	10785111	+	27.6182	4.12581	2.97068	3.06869	0.0461882	0.130644	1.48499	0.570457	1.48499	3.5149	2.36694	-1.0007	2.20675
FLNB	3	58008400	58172252	+	12552.9	1949.26	1366.9	1394.77	1.62003e-07	5.07044e-06	1.4845	0.56998	1.4845	1793.75	1208.32	1.3558	1.62543
MIDEAS	14	73715122	73790286	-	758.954	117.406	82.6454	84.3283	6.75285e-06	0.000115766	1.48446	0.569935	1.48446	107.493	72.4122	1.31211	1.67944
DOK3	5	177501907	177511275	-	47.697	6.67756	5.16572	5.29967	0.0137753	0.0534998	1.48406	0.569554	1.48406	6.16475	4.15396	1.08586	2.02829
IL1R1	2	102064544	102179875	+	754.482	111.997	82.3752	83.8314	1.34036e-05	0.000206819	1.48354	0.569049	1.48354	104.038	70.1283	1.30055	1.69229
AC084018.2	12	121800797	121803404	+	11.9448	1.91907	1.28189	1.3272	0.110663	0.246496	1.48193	0.567479	1.48193	1.56639	1.05699	-1.14261	2.50931
RNF122	8	33547754	33567129	-	32.7182	4.80787	3.56766	3.63536	0.0141123	0.054397	1.48117	0.566739	1.48117	4.42736	2.9891	1.08988	2.01295
SLC38A6	14	60981114	61083734	+	98.9194	13.355	10.8013	10.991	0.000971705	0.00664163	1.48071	0.566288	1.48071	13.1754	8.89805	1.2025	1.82328
ANKRD37	4	185396021	185400629	+	11.3515	1.69612	1.22476	1.26128	0.10435	0.236744	1.4794	0.56501	1.4794	1.58101	1.06869	-1.11817	2.44725
RNF149	2	101271219	101308702	-	598.46	87.3717	65.2032	66.4956	2.84176e-07	8.2977e-06	1.47898	0.564602	1.47898	85.425	57.7594	1.34537	1.62586
BORA	13	72727749	72756199	+	64.8847	9.70526	6.99617	7.20941	0.00280455	0.0154962	1.47888	0.564504	1.47888	7.60442	5.14202	1.167	1.87411
EPB41L2	6	130839347	131063323	-	1096.7	168.54	119.265	121.856	3.24802e-07	9.3322e-06	1.47846	0.564096	1.47846	157.721	106.679	1.34431	1.626
BVES	6	105096822	105137158	-	113.368	17.5659	12.2707	12.5965	0.00157194	0.00978871	1.47612	0.561808	1.47612	16.2468	11.0064	1.1874	1.83504
H2BC4	6	26114873	26123927	-	11.568	1.78076	1.20291	1.28533	0.266499	0.449251	1.47573	0.561426	1.47573	1.40568	0.952536	-1.27427	2.77507
BBX	3	107522936	107811340	+	940.848	137.207	102.889	104.539	8.01235e-07	1.988e-05	1.4738	0.559537	1.4738	130.127	88.2935	1.33133	1.63151
AC114271.1	19	10333436	10336249	+	29.9501	4.29782	3.24178	3.32779	0.032105	0.100396	1.47347	0.559215	1.47347	3.91653	2.65804	1.02473	2.11872
UBR2	6	42564062	42693505	+	273.82	37.0531	29.9769	30.4245	2.37831e-05	0.000334313	1.47274	0.558507	1.47274	35.7881	24.3003	1.28298	1.69058
AC148477.2	12	132277349	132280901	+	36.5485	7.00018	3.8629	4.06095	0.0613561	0.161141	1.4712	0.556998	1.4712	5.47938	3.72441	1.01582	2.13074
LGMN	14	92703807	92748680	-	525.755	77.6741	57.3971	58.4172	8.3643e-06	0.000139399	1.47021	0.556021	1.47021	73.3015	49.8579	1.2991	1.66386
LINC01011	6	2987967	2991174	+	13.0356	2.02912	1.38849	1.4484	0.118503	0.259316	1.47005	0.555862	1.47005	1.60072	1.08889	-1.14975	2.48465
EID2	19	39538707	39540162	-	295.214	46.2081	32.195	32.8016	4.53075e-05	0.000560144	1.46991	0.555729	1.46991	41.3647	28.1409	1.27551	1.69394
ANGPT1	8	107249482	107498056	-	10.6001	1.78076	1.12112	1.17779	0.166484	0.327452	1.46975	0.555575	1.46975	1.33901	0.911041	-1.23552	2.66894
HNRNPRP1	10	21624592	21626287	-	19.434	2.76012	2.11596	2.15933	0.0487063	0.13584	1.46917	0.555002	1.46917	2.56045	1.74279	-1.00281	2.16454
AC023024.1	15	101295419	101305738	+	24.6556	4.5918	2.48826	2.73951	0.152018	0.307028	1.46637	0.552246	1.46637	3.89846	2.65859	-1.1266	2.42246
BRD7P5	13	94757451	94759273	-	20.6896	3.75081	2.23309	2.29884	0.0750626	0.187246	1.46605	0.551937	1.46605	2.78436	1.89922	-1.03543	2.22545
H2AC18	1	149842188	149842737	-	34.1479	6.28883	3.08448	3.79421	0.0843392	0.203394	1.46472	0.55062	1.46472	3.62961	2.47803	-1.72543	3.70171
EGF	4	109912883	110013767	+	10.818	1.74462	1.16284	1.202	0.109138	0.244141	1.46376	0.549683	1.46376	1.60456	1.09619	-1.10106	2.35914
LMTK2	7	98106862	98209639	+	1106.62	164.072	121.162	122.958	1.26862e-06	2.90669e-05	1.46351	0.549434	1.46351	150.933	103.131	1.31965	1.62306
ATP6V1B2	8	20197381	20226820	+	547.866	81.4655	60.0348	60.874	1.05497e-06	2.51756e-05	1.46319	0.549117	1.46319	74.4239	50.8642	1.32165	1.61989
PTOV1-AS2	19	49856970	49859290	-	25.5344	3.82706	2.77249	2.83716	0.0351497	0.107412	1.46246	0.548392	1.46246	3.48335	2.38185	1.01899	2.09891
NAB2	12	57089043	57095477	+	91.615	12.5717	9.94372	10.1794	0.00207497	0.012257	1.46228	0.548218	1.46228	11.1288	7.6106	1.17465	1.82033
AL161909.1	9	19200335	19201047	-	10.0561	1.51372	1.07203	1.11735	0.150753	0.305503	1.46089	0.546851	1.46089	1.27527	0.872936	-1.22734	2.61939
ANP32C	4	164197007	164197712	-	12.1975	1.9529	1.30312	1.35528	0.127941	0.273594	1.46029	0.54626	1.46029	1.48954	1.02003	-1.15553	2.46413
ZC3H12A	1	37474580	37484378	+	192.482	27.1274	21.091	21.3869	6.33845e-05	0.000741516	1.46024	0.546206	1.46024	25.5391	17.4897	1.2608	1.69123
PRKCQ	10	6427143	6580302	-	68.3016	9.42049	7.4357	7.58907	0.00629346	0.0292595	1.46014	0.546103	1.46014	9.03645	6.18877	1.12251	1.89932
CCDC125	5	69280175	69332810	-	102.993	15.5532	11.1754	11.4437	0.00159547	0.00989128	1.45938	0.545352	1.45938	14.6104	10.0114	1.17646	1.81033
GCLM	1	93885199	93909457	-	1858.39	260.892	203.82	206.488	1.09958e-07	3.65661e-06	1.45827	0.544258	1.45827	249.935	171.392	1.33998	1.587
PSENEN	19	35745600	35747520	+	668.986	97.1082	73.2522	74.3318	1.96881e-07	6.04175e-06	1.45824	0.544226	1.45824	92.3848	63.3537	1.33499	1.59287
LINC00511	17	72290091	72640473	-	217.491	32.2042	23.5363	24.1657	7.12022e-05	0.000815348	1.45799	0.543977	1.45799	31.6805	21.7289	1.25571	1.69284
RCN1	11	32091074	32105723	+	2866.29	403.684	313.749	318.476	1.29263e-08	5.89523e-07	1.45748	0.543472	1.45748	397.642	272.829	1.35688	1.56553
SORBS1	10	95311771	95561415	-	13.7093	2.19583	1.48136	1.52326	0.0898421	0.213271	1.45711	0.543107	1.45711	1.96522	1.34871	-1.07086	2.27361
AC022210.1	2	84915868	84916661	+	15.3439	2.63543	1.63986	1.70488	0.135536	0.283752	1.45609	0.542102	1.45609	2.07529	1.42524	-1.13555	2.4076
ING1	13	110712736	110723340	+	120.204	16.9255	13.1668	13.356	0.000355589	0.0030061	1.4518	0.537841	1.4518	16.1314	11.1113	1.21995	1.72771
FAM160B1	10	114821744	114899833	+	252.075	37.0711	27.4579	28.0083	3.52151e-05	0.000454946	1.45157	0.537613	1.45157	35.7119	24.6023	1.26462	1.66615
CCNG2	4	77157207	77433389	+	24.3249	4.48305	2.59319	2.70276	0.119501	0.261023	1.45133	0.537379	1.45133	3.31335	2.28297	-1.08019	2.27528
RILP	17	1646145	1649867	-	84.1681	12.1681	9.18991	9.35201	0.000713859	0.0051873	1.45128	0.537326	1.45128	11.8091	8.137	1.20341	1.7502
SPART	13	36301638	36370181	-	324.418	46.4042	35.5684	36.0464	1.26812e-05	0.00019759	1.45067	0.536722	1.45067	43.3212	29.8629	1.28164	1.642
NFKBIZ	3	101827991	101861023	+	27.6269	4.66603	2.91922	3.06965	0.0455151	0.129402	1.45065	0.536697	1.45065	4.17142	2.87556	1.00006	2.10425
CD59	11	33703010	33736480	-	1392.82	222.944	146.035	154.758	4.90932e-07	1.29408e-05	1.45047	0.536519	1.45047	218.73	150.799	1.3202	1.59359
NXT2	X	109535781	109544691	+	112.395	16.2241	12.3257	12.4883	0.000340052	0.00290297	1.4504	0.536453	1.4504	14.7688	10.1826	1.22345	1.71945
S1PR2	19	10221433	10231332	-	20.9431	3.65965	2.23221	2.32701	0.107892	0.242258	1.44948	0.535531	1.44948	2.9268	2.01921	-1.09402	2.29851
MLLT6	17	38705273	38729796	+	1185.67	169.251	129.746	131.741	1.54958e-07	4.88185e-06	1.44896	0.535014	1.44896	164.51	113.537	1.3306	1.57784
TSKU	11	76782251	76798154	+	5917.72	847.048	645.974	657.525	0.000228689	0.00211957	1.44875	0.534805	1.44875	783.275	540.657	1.22705	1.7105
AC010969.2	2	9936360	9939591	+	42.5318	6.45481	4.62636	4.72576	0.0187995	0.06735	1.44806	0.534117	1.44806	5.76456	3.98089	1.07128	1.95734
AL355472.1	1	234356704	234357142	-	9.44663	1.57367	1.00396	1.04963	0.23662	0.414906	1.44712	0.533188	1.44712	1.31182	0.906502	-1.25254	2.62302
MPPE1	18	11882622	11908367	-	98.1037	13.7434	10.7555	10.9004	0.000603301	0.00454009	1.44667	0.532737	1.44667	13.0476	9.01905	1.20596	1.73543
CASZ1	1	10636604	10796651	-	161.703	22.0319	17.7215	17.9669	0.000166175	0.00163399	1.44658	0.53265	1.44658	20.961	14.49	1.23502	1.69439
SLC51A	3	196211487	196243179	+	10.9102	1.65739	1.17192	1.21225	0.122944	0.266197	1.44637	0.532435	1.44637	1.45432	1.0055	-1.18713	2.48345
AL357141.1	6	116033901	116046754	+	9.99923	1.73839	1.08235	1.11103	0.167532	0.329017	1.44595	0.53202	1.44595	1.40086	0.968818	-1.15781	2.42072
GLA	X	101393273	101408013	-	679.22	89.3841	74.6115	75.4689	8.35949e-08	2.90781e-06	1.44578	0.53185	1.44578	89.2145	61.7068	1.33365	1.56734
LIMA1	12	50175788	50283547	-	56.9917	10.2927	6.02654	6.33241	0.0649762	0.168007	1.44544	0.531504	1.44544	8.25308	5.70975	-1.00717	2.10426
MTF1	1	37809574	37859593	-	225.284	29.0935	24.6552	25.0315	0.000181006	0.00175461	1.4447	0.530765	1.4447	29.0549	20.1114	1.23022	1.69656
EIF4A3	17	80134369	80147152	-	974.623	141.028	106.755	108.291	8.43125e-06	0.000140027	1.44413	0.530204	1.44413	131.087	90.7721	1.28195	1.62684
MAP3K14	17	45263119	45317030	-	1072.06	154.494	117.188	119.118	6.09378e-07	1.56327e-05	1.44347	0.52954	1.44347	149.548	103.603	1.31387	1.58585
AC004069.1	4	105137280	105140620	-	10.7834	1.60456	1.1731	1.19816	0.124338	0.268447	1.44338	0.529456	1.44338	1.40001	0.96995	-1.13798	2.37081
PSMB3	17	38752741	38764226	+	911.278	124.112	100.048	101.253	1.23368e-07	4.03331e-06	1.44189	0.527958	1.44189	122.033	84.634	1.32732	1.56634
AC245100.2	1	148435105	148436927	+	19.366	2.94591	2.10031	2.15178	0.0763515	0.189868	1.44097	0.527045	1.44097	2.55713	1.77458	-1.04531	2.17049
FKBP4P6	9	42384805	42386137	+	9.95594	1.67393	1.02622	1.10622	0.234272	0.412691	1.44095	0.527016	1.44095	1.27849	0.88726	-1.40107	2.90908
TF	3	133746040	133796642	+	19.5227	4.37066	1.89628	2.16919	0.435696	0.621384	1.44078	0.526848	1.44078	1.98625	1.37859	-1.35903	2.82113
C1orf159	1	1081818	1116362	-	206.945	27.9996	22.6983	22.9939	7.03769e-05	0.000808181	1.43882	0.524887	1.43882	26.9402	18.7238	1.24724	1.65983
SMCHD1	18	2655726	2805018	+	527.754	74.1644	57.931	58.6394	1.39404e-06	3.12479e-05	1.43819	0.52425	1.43819	70.4476	48.9837	1.30136	1.58939
LETM1P2	19	58044592	58046770	+	19.4402	3.02721	2.07824	2.16002	0.128098	0.273726	1.43814	0.524206	1.43814	2.59702	1.80582	-1.12351	2.3237
ZNF462	9	106863166	107013635	+	242.389	38.2842	26.4925	26.9321	0.000336088	0.0028791	1.43808	0.524149	1.43808	32.937	22.9034	1.2199	1.69529
CPQ	8	96645242	97149655	+	74.1114	12.7351	8.01268	8.2346	0.0172175	0.0630277	1.43801	0.524073	1.43801	10.3341	7.1864	1.08476	1.90629
FRRS1	1	99703970	99766636	-	62.3385	9.05749	6.78332	6.9265	0.00682287	0.0312058	1.43766	0.523727	1.43766	7.60256	5.28813	1.12658	1.83465
AF117829.1	8	89585872	89757813	-	43.4572	6.62926	4.65373	4.82858	0.0358296	0.108937	1.43765	0.523714	1.43765	6.06177	4.21644	-1.00702	2.08135
LPCAT3	12	6976185	7018478	-	269.848	41.5778	29.3547	29.9831	0.00142383	0.0090628	1.43647	0.522529	1.43647	37.2312	25.9185	1.18007	1.74858
SOAT1	1	179293714	179358681	+	395.247	55.1268	43.3665	43.9164	4.21142e-06	7.67782e-05	1.4361	0.522159	1.4361	53.1437	37.0055	1.28758	1.60175
AC004922.1	7	99325879	99394654	+	32.2463	5.69394	2.75138	3.58292	0.128579	0.274398	1.43556	0.521616	1.43556	4.76654	3.32033	-2.1625	4.45657
BEND6	6	56955107	57027347	+	31.0425	5.39794	3.36397	3.44917	0.0359266	0.109104	1.43509	0.521141	1.43509	4.38631	3.05647	1.03732	1.98539
FAM122C	X	134796395	134854836	+	14.6388	2.51442	1.48501	1.62653	0.2884	0.474969	1.4344	0.520447	1.4344	1.90199	1.32598	-1.44803	2.97933
AC027117.1	8	17808361	17822184	+	22.4808	3.14023	2.45533	2.49787	0.0509698	0.140652	1.43421	0.52026	1.43421	2.8553	1.99085	1.00722	2.04222
TNRC18P3	7	56991888	57009150	+	10.1038	1.88764	1.07043	1.12265	0.201704	0.373654	1.43392	0.519962	1.43392	1.1562	0.806324	-1.22103	2.51059
PGGHG	11	289126	296108	+	214.73	31.2506	23.5415	23.8589	7.83063e-05	0.000880532	1.43349	0.519529	1.43349	28.8188	20.104	1.24362	1.65234
TMEM234	1	32214472	32222360	-	40.1736	6.40233	4.37426	4.46373	0.0355794	0.108278	1.43121	0.517239	1.43121	5.16783	3.6108	1.04984	1.95112
TTC32	2	19896631	19901984	-	31.7672	4.36139	3.47923	3.52969	0.0208147	0.0725433	1.43075	0.516767	1.43075	4.09824	2.86441	1.06352	1.92478
AC009090.6	16	57177349	57181391	+	13.4426	1.91189	1.44249	1.49362	0.106169	0.239552	1.42973	0.515743	1.42973	1.71561	1.19996	-1.16269	2.3767
TWIST2	2	238848032	238910535	+	88.9375	12.5606	9.64488	9.88195	0.00535102	0.0257617	1.42939	0.515396	1.42939	10.7154	7.4965	1.12596	1.81459
IL4R	16	27313668	27364779	+	375.61	60.9874	40.8627	41.7345	7.27018e-05	0.000829574	1.42883	0.514835	1.42883	53.2536	37.2708	1.24446	1.64052
AC048338.1	12	122207779	122266424	-	30.3716	4.82077	3.02605	3.37463	0.0853615	0.205206	1.42839	0.514394	1.42839	3.20881	2.24644	-1.29554	2.64331
HNRNPCP3	15	79236332	79237207	+	12.2821	2.04244	1.29833	1.36468	0.212155	0.386485	1.42647	0.512447	1.42647	1.605	1.12516	-1.26087	2.56563
HPS3	3	149129638	149173733	+	440.564	59.806	48.3925	48.9516	3.87653e-06	7.16735e-05	1.42639	0.512372	1.42639	57.3238	40.1879	1.28243	1.58652
CCDC77	12	389273	442643	+	98.8438	13.084	10.6837	10.9826	0.0123148	0.0489659	1.4262	0.512173	1.4262	12.3571	8.6644	1.06123	1.91669
NECTIN2	19	44846175	44889224	+	1573.09	212.071	172.844	174.788	2.36899e-07	7.09558e-06	1.42581	0.511781	1.42581	206.119	144.563	1.31025	1.55156
ID1	20	31605283	31606516	+	1485.41	224.955	160.884	165.045	0.00752136	0.0336737	1.4258	0.511771	1.4258	196.855	138.066	1.11192	1.82828
AC244102.4	X	152574677	152698701	-	11.5085	1.78076	1.16518	1.27873	0.158449	0.315754	1.42578	0.511752	1.42578	1.46099	1.0247	-1.48673	3.0223
RSC1A1	1	15659869	15661723	+	25.574	4.62242	2.63168	2.84155	0.192367	0.361341	1.42427	0.510224	1.42427	3.47438	2.43941	-1.26103	2.55806
PPIEL	1	39522280	39559672	-	31.6533	4.37282	3.44763	3.51704	0.02284	0.0778456	1.42397	0.509919	1.42397	3.81839	2.68151	1.05333	1.92503
LSP1P4	2	91617160	91659973	-	24.7956	3.99879	2.62708	2.75507	0.157876	0.315094	1.42351	0.509453	1.42351	3.07533	2.16038	-1.13561	2.30119
YBX3P1	16	31568386	31569476	-	119.513	18.3893	13.0094	13.2792	0.0012711	0.00826434	1.42317	0.509107	1.42317	16.7956	11.8016	1.17548	1.72305
SETSIP	1	92074533	92075442	-	22.168	3.67627	2.33069	2.46311	0.139818	0.289887	1.42291	0.508843	1.42291	2.99374	2.10396	-1.19127	2.41192
RARB	3	25174332	25597933	+	303.247	46.4915	32.8576	33.6941	0.00531867	0.0256661	1.42178	0.507701	1.42178	41.9915	29.5344	1.13273	1.7846
AL031708.1	16	1632259	1686716	+	19.495	3.36822	2.08329	2.16611	0.114313	0.252306	1.42169	0.507609	1.42169	2.63078	1.85046	-1.13213	2.28828
RAB2B	14	21459020	21476961	-	159.421	21.9912	17.4871	17.7134	0.000205829	0.00194408	1.42168	0.507598	1.42168	21.305	14.9858	1.21793	1.65951
LIMK1	7	74082933	74122526	+	1126.06	169.255	122.461	125.118	8.52307e-07	2.0859e-05	1.42073	0.50663	1.42073	161.153	113.43	1.29526	1.55834
WT1-AS	11	32435518	32458770	+	16.3761	2.84736	1.7426	1.81957	0.138432	0.288027	1.42063	0.506533	1.42063	1.92253	1.35329	-1.13831	2.29732
AC239868.1	1	149861271	149862505	+	9.72351	1.42124	1.01493	1.08039	0.258954	0.440818	1.42041	0.506308	1.42041	1.1	0.774421	-1.3046	2.63211
PCDHA2	5	140794852	141012348	+	10.2866	2.28743	1.06413	1.14296	0.288407	0.474969	1.41938	0.505258	1.41938	1.52545	1.07474	-1.30044	2.61991
ADPRH	3	119579268	119589946	+	42.0713	6.14336	4.50318	4.67459	0.0475811	0.133636	1.41928	0.505156	1.41928	5.62357	3.96228	-1.04218	2.09932
C14orf132	14	96039324	96093890	+	208.058	31.1397	22.5974	23.1176	0.00254237	0.0143343	1.418	0.50386	1.418	28.8969	20.3786	1.14965	1.74899
OAF	11	120211032	120230335	+	137.093	18.2518	15.0441	15.2325	0.000255927	0.00231673	1.4179	0.503756	1.4179	17.3217	12.2165	1.21318	1.65716
CARS1	11	3000922	3057614	-	803.372	113.339	88.1517	89.2636	3.43607e-06	6.45358e-05	1.41785	0.503708	1.41785	107.927	76.1203	1.27769	1.57339
ERLIN1	10	100150094	100186034	-	667.285	95.9486	73.2909	74.1428	5.17488e-07	1.35661e-05	1.41725	0.503093	1.41725	89.6468	63.2541	1.29787	1.54761
ITGB6	2	160099667	160200314	-	54.072	8.60005	5.76602	6.00799	0.00909041	0.0388669	1.41693	0.502772	1.41693	8.11439	5.72672	1.10032	1.82465
CSTF3	11	33077188	33162372	-	366.998	49.2352	40.3067	40.7776	1.22643e-05	0.000192137	1.41676	0.502595	1.41676	48.4647	34.2081	1.26087	1.59192
RASSF4	10	44959407	44995892	+	21.6493	4.02561	2.26722	2.40548	0.114083	0.252024	1.41633	0.502157	1.41633	3.16388	2.23386	-1.14118	2.28918
POMP	13	28659104	28678960	+	386.038	53.208	42.3824	42.8931	1.83055e-05	0.000267253	1.41371	0.499489	1.41371	51.3006	36.2879	1.25553	1.59182
PERM1	1	975204	982094	-	11.0137	2.03769	1.15875	1.22375	0.215286	0.39011	1.41343	0.499201	1.41343	1.61103	1.1398	-1.2461	2.48945
SIPA1L1	14	71320449	71741230	+	321.832	46.1105	35.3077	35.7591	5.833e-05	0.000693109	1.41342	0.499194	1.41342	40.834	28.8901	1.23942	1.61186
GPC6	13	93226807	94408021	+	407.048	62.4525	43.878	45.2275	0.00197601	0.0118133	1.4131	0.498869	1.4131	58.4517	41.364	1.15192	1.73351
AL157935.3	9	127867850	127906023	-	67.2364	10.6335	7.16009	7.47071	0.0694471	0.176925	1.41242	0.49817	1.41242	9.16546	6.48919	-1.04878	2.09224
UBE2D1	10	58334979	58370752	+	188.085	27.7212	20.6404	20.8983	0.000274807	0.00245515	1.41108	0.496799	1.41108	24.7197	17.5183	1.21036	1.64509
LSR	19	35248330	35267965	+	548.583	74.7875	60.199	60.9537	4.15242e-05	0.000522362	1.41107	0.496791	1.41107	70.9603	50.2882	1.24127	1.6041
ARF3	12	48935723	48957488	-	2230.76	318.033	244.563	247.862	3.86821e-08	1.52667e-06	1.41098	0.496702	1.41098	306.447	217.187	1.31428	1.51481
AC109460.2	16	28952816	28966884	-	23.9032	3.55571	2.607	2.65591	0.052988	0.144692	1.41092	0.496635	1.41092	2.94631	2.08822	-1.00333	1.99733
NTNG2	9	132161676	132244527	+	48.3517	6.99646	5.22857	5.37241	0.0189756	0.0677268	1.41026	0.495962	1.41026	5.63361	3.99473	1.06808	1.86206
BCL2L13	22	17628855	17730856	+	512.002	71.1766	56.2982	56.8891	1.80911e-06	3.86177e-05	1.41008	0.495782	1.41008	66.3685	47.067	1.28093	1.55226
MCOLN2	1	84925583	84997114	-	38.8462	5.43228	4.22093	4.31625	0.02746	0.089474	1.4088	0.494472	1.4088	4.72113	3.35116	1.037	1.91391
C6orf62	6	24704861	24719999	-	580.942	77.5563	63.8762	64.5491	1.76567e-06	3.78591e-05	1.40847	0.494129	1.40847	75.5801	53.6612	1.27956	1.55036
GDPGP1	15	90233808	90245812	+	79.7434	11.1834	8.66484	8.86038	0.00788272	0.0348655	1.40799	0.493638	1.40799	11.0851	7.87299	1.10424	1.7953
FOSL2	2	28392448	28417318	+	2967.29	435.134	321.768	329.698	9.65865e-08	3.29587e-06	1.40768	0.49332	1.40768	429.285	304.959	1.30475	1.51873
SPSB1	1	9292894	9369533	+	475.498	65.6812	52.2406	52.8331	1.03944e-05	0.000167594	1.40734	0.492967	1.40734	62.5419	44.4399	1.25796	1.57446
ZNF710	15	90001324	90082207	+	241.598	33.3204	26.5579	26.8442	3.18994e-05	0.000421589	1.40713	0.492752	1.40713	31.5553	22.4254	1.24302	1.59289
DGKG	3	186105668	186362235	-	225.727	31.0525	24.7385	25.0808	0.000485108	0.00382705	1.40535	0.490925	1.40535	29.628	21.0824	1.19023	1.65934
TPT1-AS1	13	45341345	45417976	+	113.91	17.0098	12.4734	12.6567	0.00199389	0.0118806	1.40488	0.490446	1.40488	15.3497	10.926	1.16216	1.69828
TMEM63A	1	225845536	225882381	-	145.716	20.2191	16.0087	16.1906	0.000258471	0.00233487	1.40478	0.490345	1.40478	19.2898	13.7316	1.20754	1.63424
PTP4A2P1	17	42533532	42534010	+	15.5386	2.7237	1.64211	1.72651	0.163317	0.322859	1.40422	0.489772	1.40422	1.78056	1.268	-1.18773	2.34202
RHBDD1	2	226835581	226999216	+	258.031	37.6934	28.1884	28.6701	0.000100171	0.00107722	1.40398	0.489519	1.40398	35.8501	25.5347	1.22307	1.61164
CLPX	15	65148219	65185343	-	531.723	74.5781	58.3981	59.0804	2.20845e-06	4.54535e-05	1.40375	0.48929	1.40375	71.5297	50.956	1.27442	1.54622
AC092143.1	16	89919165	89936093	+	36.7232	6.35206	3.04179	4.08036	0.399196	0.586746	1.40342	0.488949	1.40342	5.28235	3.76391	-2.43666	4.79924
PSMA1	11	14504874	14643636	-	934.749	123.075	102.796	103.861	8.04754e-07	1.99329e-05	1.40322	0.488743	1.40322	122.158	87.0557	1.28387	1.53367
ADK	10	74151202	74709964	+	279.539	41.2223	30.5091	31.0599	3.78201e-05	0.000483814	1.40291	0.48842	1.40291	39.2182	27.955	1.23926	1.58817
TBC1D19	4	26576437	26756224	+	26.4109	4.39156	2.81941	2.93454	0.0636156	0.165444	1.4024	0.487893	1.4024	3.8407	2.73867	-1.04558	2.05636
MORC3	21	36320189	36386149	+	116.94	17.2	12.7919	12.9934	0.00159599	0.00989128	1.40101	0.486468	1.40101	15.957	11.3896	1.16265	1.68824
FKBP11	12	48921518	48926475	-	248.745	33.1858	27.2678	27.6384	5.15891e-05	0.000623846	1.4003	0.485738	1.4003	30.511	21.7889	1.23329	1.58993
MLEC	12	120687149	120701860	+	3129.23	433.2	343.51	347.692	1.52563e-06	3.37188e-05	1.40016	0.485589	1.40016	420.855	300.577	1.27576	1.53669
AL034397.1	X	65956289	65957197	-	21.751	3.26723	2.34547	2.41678	0.0915181	0.215605	1.39957	0.484987	1.39957	2.52223	1.80214	-1.04641	2.04972
AK4P1	17	31345519	31346191	+	111.495	17.5621	12.1303	12.3883	0.00454197	0.0226091	1.39945	0.484862	1.39945	15.5242	11.093	1.13248	1.72936
AGPAT3	21	43865223	43987593	+	1507.55	204.387	165.791	167.505	1.59941e-07	5.01683e-06	1.39935	0.484754	1.39935	199.678	142.693	1.29505	1.51205
HES7	17	8120592	8124107	-	21.3352	3.06188	2.26315	2.37058	0.0886492	0.211025	1.39852	0.483903	1.39852	2.58122	1.84568	-1.15839	2.26565
RASGRP1	15	38488103	38565576	-	35.4272	5.95392	3.76097	3.93635	0.0520013	0.142676	1.39662	0.481945	1.39662	5.17269	3.70371	-1.0343	2.01746
UBE2F-SCLY	2	237967014	238099413	+	13.8284	2.92323	1.42955	1.53648	0.326622	0.515631	1.39639	0.481705	1.39639	1.86091	1.33265	-1.3372	2.60742
EFR3A	8	131904093	132013643	+	1026.86	142.092	112.815	114.095	1.3484e-05	0.000207622	1.39634	0.481649	1.39634	133.63	95.7004	1.24833	1.5619
AL133415.1	10	17233325	17234834	-	34.1253	4.76646	3.69702	3.7917	0.0457171	0.129771	1.39609	0.481393	1.39609	4.59959	3.29462	-1.01733	1.98285
NME2P1	12	120282303	120282717	+	13.7454	2.12353	1.46319	1.52726	0.150797	0.305549	1.39605	0.481355	1.39605	1.92804	1.38106	-1.20557	2.34961
NAPB	20	23374519	23421520	-	51.9976	7.4107	5.70723	5.77751	0.0089582	0.0384045	1.39578	0.481075	1.39578	6.84709	4.90555	1.09912	1.77252
PANX1	11	94128841	94181969	+	221.425	29.9185	24.3142	24.6028	0.00016345	0.00161383	1.3957	0.480987	1.3957	29.2607	20.9649	1.20939	1.61071
RFX5	1	151340640	151347358	-	461.595	64.0237	50.605	51.2883	0.000117655	0.00123685	1.39439	0.479638	1.39439	61.6009	44.1775	1.21234	1.60378
GAS8	16	90019629	90044976	+	312.829	47.3846	34.011	34.7587	5.75189e-05	0.000684604	1.39438	0.479625	1.39438	44.5299	31.9352	1.22792	1.5834
GNB4	3	179396088	179451477	-	426.55	57.1043	46.8639	47.3945	2.63582e-05	0.000361318	1.39427	0.479506	1.39427	56.2123	40.3168	1.2377	1.57064
ANP32BP1	15	75321397	75322694	-	28.7468	4.05098	3.14496	3.19409	0.0411359	0.120505	1.39409	0.479319	1.39409	3.83414	2.75029	1.01178	1.92085
PLCB1	20	8077251	8968361	+	86.5839	12.717	9.35337	9.62043	0.0451616	0.128754	1.39407	0.479305	1.39407	10.834	7.77149	1.01755	1.90991
ZNF141	4	337814	384869	+	25.3359	3.75081	2.77253	2.8151	0.0518935	0.142542	1.39344	0.478648	1.39344	3.26493	2.34308	-1.00756	1.95635
UBA6	4	67612652	67701156	-	352.7	49.0381	38.7158	39.1889	6.80197e-05	0.000787387	1.39324	0.478446	1.39324	46.871	33.6416	1.22216	1.58827
NOCT	4	139015781	139045940	+	188.776	27.4467	20.6208	20.9751	9.47108e-05	0.00102843	1.39308	0.47828	1.39308	26.3975	18.949	1.21884	1.59224
IL17RC	3	9917074	9933631	+	312.082	43.4386	34.3066	34.6758	3.49789e-05	0.000453117	1.39229	0.477462	1.39229	40.9268	29.3953	1.23307	1.57208
PTK2B	8	27311482	27459392	+	147.078	22.9405	15.954	16.3421	0.0128763	0.0507062	1.39205	0.477208	1.39205	20.0945	14.4352	1.08467	1.78653
SLC18B1	6	132769370	132813340	-	84.4099	11.7524	9.22783	9.37888	0.00812142	0.0356034	1.3908	0.475919	1.3908	10.7186	7.7068	1.09641	1.76425
EEF1AKMT1	13	20728731	20773962	-	16.5874	2.61688	1.77178	1.84304	0.134876	0.282741	1.3902	0.475291	1.3902	2.22259	1.59875	-1.18699	2.29404
AL391650.1	1	26169516	26171832	-	28.4551	4.16261	3.08119	3.16168	0.0790985	0.194541	1.38987	0.474955	1.38987	3.62162	2.60572	-1.05424	2.03653
AL031714.1	16	1317891	1322846	-	21.8504	3.33937	2.3436	2.42782	0.129099	0.275073	1.38972	0.47479	1.38972	2.66241	1.91579	-1.12391	2.17062
ZNF624	17	16620734	16653857	-	29.9866	4.37066	3.26087	3.33185	0.0631328	0.164613	1.38775	0.472747	1.38775	3.80857	2.74442	-1.02803	1.97983
ATP6V1FNB	7	128866330	128872048	+	11.7639	2.19583	1.23878	1.3071	0.195136	0.364968	1.38748	0.472465	1.38748	1.75928	1.26797	-1.1993	2.30877
DISC1	1	231626790	232041273	+	12.3194	2.61687	1.26916	1.36882	0.237756	0.416181	1.38706	0.472031	1.38706	1.90798	1.37555	-1.203	2.3145
TMEM81	1	205083129	205084461	-	14.5067	2.4051	1.52899	1.61185	0.2152	0.390103	1.38687	0.471836	1.38687	1.71578	1.23716	-1.25217	2.40844
NAPA	19	47487637	47515092	-	1127.8	160.497	123.339	125.311	4.47179e-07	1.20078e-05	1.38677	0.471727	1.38677	156.997	113.211	1.27773	1.50512
C2CD4C	19	405445	409148	-	16.2518	2.67108	1.73972	1.80576	0.151521	0.306455	1.38677	0.471724	1.38677	2.31446	1.66896	-1.13996	2.19228
H2BC21	1	149884459	149886653	-	23.5724	3.75114	2.56964	2.61916	0.0764117	0.189951	1.38561	0.470517	1.38561	3.03537	2.19064	-1.04441	2.00517
SDCBP2-AS1	20	1325405	1378736	+	20.712	3.22746	2.24554	2.30133	0.103216	0.234955	1.38519	0.470079	1.38519	2.6973	1.94725	-1.09604	2.10301
AC004264.1	22	30246205	30246999	+	13.697	2.56804	1.42129	1.52189	0.220363	0.396361	1.38434	0.469196	1.38434	1.57183	1.13543	-1.32185	2.53318
BAZ2A	12	56595596	56636817	-	1478.56	204.869	162.277	164.284	1.12394e-06	2.65569e-05	1.38427	0.46913	1.38427	200.374	144.75	1.26794	1.51129
ZNRD1	6	30058899	30064910	+	87.3295	12.9154	9.49096	9.70328	0.0209337	0.0728697	1.38258	0.467361	1.38258	11.1946	8.09692	1.03898	1.83981
CENPX	17	82018702	82024108	-	630.562	95.9774	68.9771	70.0624	0.000410833	0.00337066	1.38193	0.466687	1.38193	85.2027	61.6548	1.1877	1.60793
ZNF827	4	145757627	145938824	-	218.56	31.0148	23.972	24.2844	0.000666843	0.00492517	1.3819	0.466652	1.3819	28.977	20.969	1.17823	1.62078
GGCX	2	85544720	85561548	-	577.206	80.5034	63.2679	64.134	8.72993e-07	2.11848e-05	1.3815	0.466232	1.3815	79.3822	57.461	1.26848	1.50459
SCO1	17	10672474	10698376	-	677.822	90.9915	74.5859	75.3135	1.38517e-06	3.11414e-05	1.38097	0.465687	1.38097	89.3681	64.7138	1.26381	1.509
AC140479.2	2	110360608	110363738	-	33.2377	4.8101	3.61219	3.69307	0.0380274	0.113789	1.38074	0.465443	1.38074	3.94422	2.85659	1.00706	1.89308
DYRK4	12	4562204	4615303	+	93.1066	14.22	10.1866	10.3452	0.00401271	0.0205132	1.38029	0.464973	1.38029	12.7146	9.21155	1.13276	1.68191
KDM3A	2	86440647	86492717	+	425.706	60.0113	46.8006	47.3006	4.65155e-06	8.3322e-05	1.37994	0.464608	1.37994	56.958	41.2756	1.25141	1.52168
ZC3H7B	22	41301525	41360148	+	1446.56	205.221	158.735	160.729	1.20951e-06	2.82534e-05	1.37987	0.464527	1.37987	196.414	142.343	1.26423	1.50608
RAB27B	18	54717860	54895517	+	523.97	75.1015	57.617	58.2189	7.67555e-06	0.000128967	1.37986	0.464527	1.37986	69.4101	50.3021	1.24607	1.52803
PTER	10	16436943	16513746	+	212.042	30.0058	23.275	23.5602	0.000543698	0.00419482	1.37962	0.464266	1.37962	26.7197	19.3675	1.17944	1.61376
RBMS1	2	160272151	160493808	-	594.229	86.3852	65.1494	66.0254	3.6579e-05	0.000469192	1.37948	0.464125	1.37948	80.4724	58.3353	1.22583	1.55239
TMEM170A	16	75443054	75465498	-	182.621	25.9141	20.0171	20.2913	0.000887627	0.00618411	1.37928	0.46391	1.37928	24.5101	17.7703	1.17039	1.62544
FMNL1	17	45221444	45247320	+	548.082	78.673	59.9235	60.898	0.000763922	0.00548102	1.37631	0.460808	1.37631	67.0497	48.7169	1.17135	1.61714
CCDC150	2	196639554	196763491	+	30.7532	5.03721	3.30606	3.41702	0.117019	0.256851	1.37607	0.460557	1.37607	3.59109	2.60967	-1.05725	2.00199
SYT15	10	46578217	46594174	+	42.9056	6.01395	4.6881	4.76729	0.030851	0.0975792	1.37597	0.460451	1.37597	5.49481	3.9934	1.02502	1.84708
ACP2	11	47239302	47248907	-	366.732	49.8932	40.3685	40.748	1.3375e-05	0.000206819	1.3759	0.460378	1.3759	47.7459	34.7016	1.23696	1.53045
SLC9A7	X	46599251	46759119	-	387.791	57.4552	41.9906	43.0879	1.52976e-05	0.000231575	1.37435	0.458749	1.37435	55.968	40.7233	1.23405	1.53059
PNMA2	8	26504701	26514093	-	807.665	117.144	88.4238	89.7405	1.92629e-06	4.06956e-05	1.37434	0.458737	1.37434	111.508	81.1355	1.25625	1.50353
AL136295.5	14	24147548	24166453	+	99.2277	15.1573	10.7421	11.0253	0.0346009	0.106145	1.37383	0.458208	1.37383	12.0345	8.75976	1.03391	1.82552
EHD1	11	64851642	64888297	-	2095.5	315.974	228.421	232.834	3.13612e-05	0.000416007	1.37333	0.457675	1.37333	293.174	213.477	1.22368	1.54128
SLC50A1	1	155135344	155138858	+	227.265	32.3609	24.9442	25.2517	0.000385434	0.00319512	1.37319	0.457534	1.37319	30.2256	22.0112	1.18283	1.59419
LONRF1	8	12721906	12756074	-	98.8302	14.2179	10.8146	10.9811	0.00147577	0.00931208	1.37243	0.456735	1.37243	13.6508	9.94645	1.15455	1.63143
P2RY11	19	10111693	10115373	+	49.8492	6.79239	5.46159	5.5388	0.0181387	0.0654232	1.37238	0.456679	1.37238	6.13756	4.4722	1.06601	1.7668
TMEM62	15	43123279	43185145	+	164.331	23.1096	18.0138	18.259	0.0011613	0.00767044	1.3713	0.455539	1.3713	20.1122	14.6665	1.16233	1.61783
RDH14	2	18554723	18560680	-	294.341	40.9871	32.3769	32.7046	5.47664e-05	0.000657289	1.3712	0.455439	1.3712	38.6984	28.2223	1.2152	1.54722
PTMAP8	3	117026698	117027040	+	10.429	1.66702	1.12653	1.15878	0.237861	0.41622	1.37074	0.45495	1.37074	1.34615	0.982064	-1.25169	2.35182
AL121871.1	X	92676519	92676955	-	11.991	2.35768	1.25497	1.33234	0.330834	0.520851	1.37068	0.454895	1.37068	1.65351	1.20634	-1.3501	2.53653
LMAN2	5	177331567	177351669	-	2746.69	372.546	302.244	305.188	1.38829e-07	4.4222e-06	1.37066	0.454873	1.37066	364.517	265.942	1.27552	1.4729
ARL5B	10	18659431	18681640	+	331.267	43.7875	36.4449	36.8075	7.03625e-05	0.000808181	1.3706	0.454804	1.3706	42.7994	31.2268	1.21161	1.55045
KCNK3	2	26692690	26733421	+	158.222	22.0682	17.2836	17.5802	0.00584091	0.0276001	1.37045	0.454648	1.37045	19.517	14.2413	1.11115	1.69025
L3HYPDH	14	59460363	59484409	-	269.867	37.0627	29.7028	29.9852	6.0743e-05	0.000717626	1.37042	0.454616	1.37042	35.1013	25.6136	1.21433	1.54657
RAB18	10	27504174	27542240	+	457.727	62.8025	50.2481	50.8586	8.58323e-05	0.000952175	1.37032	0.45451	1.37032	60.9934	44.5104	1.20659	1.55626
MPZ	1	161304735	161309973	-	10.0926	1.65739	1.07615	1.1214	0.307921	0.496155	1.37024	0.45443	1.37024	1.21608	0.887493	-1.30812	2.45608
ZNF280C	X	130202707	130268900	-	110.863	15.2247	12.204	12.3181	0.000890052	0.00619501	1.36977	0.453936	1.36977	14.4979	10.5842	1.16611	1.60901
HNRNPF	10	43385617	43409167	-	3369.44	465.366	370.865	374.382	1.69898e-06	3.68138e-05	1.36976	0.453922	1.36976	438.428	320.077	1.25437	1.49576
GATA3	10	8045378	8075199	+	55.3567	8.23409	6.07079	6.15075	0.0174481	0.0635819	1.3697	0.453859	1.3697	7.18332	5.24445	1.06784	1.75689
LPCAT4	15	34358633	34367197	-	448.812	62.853	49.3217	49.868	4.51907e-06	8.14516e-05	1.36955	0.453703	1.36955	60.3931	44.097	1.24476	1.50685
NFKB2	10	102394110	102402525	+	1034.18	159.904	112.887	114.909	0.000783427	0.00558612	1.36918	0.453317	1.36918	141.109	103.06	1.16879	1.60394
TGIF2	20	36573488	36593951	+	117.502	16.4681	12.8577	13.0558	0.00461813	0.0229247	1.36864	0.452747	1.36864	15.6752	11.4531	1.11424	1.68114
TMEM219	16	29940885	29973051	+	467.508	64.3167	51.3909	51.9453	2.3586e-06	4.7926e-05	1.36849	0.452582	1.36849	62.8757	45.9454	1.25069	1.49738
AC073896.2	12	56300076	56317993	+	35.1018	5.9953	3.81037	3.9002	0.0520354	0.142742	1.36756	0.451606	1.36756	4.13482	3.0235	-1.00299	1.87582
BRI3	7	98252379	98310442	+	421.665	62.7885	46.2099	46.8517	6.26136e-05	0.000733752	1.36712	0.451144	1.36712	57.3771	41.9692	1.21109	1.54326
PRRG1	X	37349275	37457296	+	125.618	16.9654	13.8232	13.9575	0.000713191	0.00518507	1.36664	0.450628	1.36664	16.4738	12.0543	1.16847	1.59841
CXCL3	4	74036589	74038808	-	16.9126	2.69672	1.83938	1.87917	0.14741	0.300602	1.36639	0.450373	1.36639	2.16021	1.58096	-1.12759	2.10524
FLNB-AS1	3	58162547	58170637	-	42.5488	6.09587	4.64234	4.72765	0.0275199	0.0896482	1.36585	0.449794	1.36585	5.80065	4.24693	1.03068	1.81001
FAM89A	1	231018958	231040255	-	222.089	30.3603	24.4373	24.6766	0.000222186	0.00206999	1.36486	0.448755	1.36486	28.7334	21.0522	1.19081	1.56436
PPAT	4	56393362	56435616	-	237.876	32.0993	26.1777	26.4307	0.000143703	0.0014467	1.36468	0.448562	1.36468	30.9224	22.6591	1.19796	1.5546
TMEM121	14	105526583	105530203	+	120.367	18.3894	13.1251	13.3741	0.00573954	0.0272306	1.36437	0.44823	1.36437	16.4946	12.0896	1.10907	1.67842
PLBD1	12	14503661	14567884	-	37.9576	5.73405	4.13439	4.21751	0.0427467	0.123661	1.364	0.447848	1.364	5.17841	3.79648	1.00733	1.84696
AP003119.3	11	76800364	76804556	+	136.304	20.4021	14.7333	15.1449	0.0139761	0.0539732	1.36323	0.447033	1.36323	18.9311	13.8869	1.05143	1.7675
FAM135A	6	70412941	70561175	+	145.277	19.6259	15.9919	16.1419	0.000320382	0.00277266	1.36127	0.444948	1.36127	19.1704	14.0828	1.18205	1.56765
TRMT44	4	8436140	8493532	+	79.8226	11.2182	8.75718	8.86918	0.00695201	0.0316955	1.36126	0.444948	1.36126	10.5874	7.77759	1.10302	1.67997
RBM34	1	235131183	235161284	-	219.011	31.2409	24.0498	24.3346	0.00119286	0.0078357	1.3605	0.444137	1.3605	28.2008	20.7283	1.15403	1.6039
AC132812.1	17	64750420	64751312	+	12.5648	2.07714	1.35479	1.39609	0.225507	0.40259	1.36049	0.444121	1.36049	1.48194	1.08927	-1.20386	2.22825
CYP4V2	4	186191567	186213464	+	131.329	19.0298	14.4397	14.5921	0.00110749	0.00738636	1.36028	0.443907	1.36028	17.2968	12.7156	1.15625	1.60032
DECR1	8	90001405	90053634	+	141.767	18.3175	15.5828	15.7519	0.000436939	0.00352842	1.36013	0.443742	1.36013	17.2974	12.7175	1.1755	1.57375
TXN	9	110243810	110256508	-	1409.8	186.346	155.348	156.644	5.87251e-07	1.5092e-05	1.35991	0.44351	1.35991	180.847	132.985	1.25691	1.47134
CMTR1	6	37433219	37482828	+	343.829	48.5806	37.7986	38.2032	0.000307695	0.00268551	1.35895	0.442491	1.35895	43.7808	32.2167	1.18297	1.56111
AC106820.1	16	2332313	2332733	-	11.2791	1.89455	1.1026	1.25323	0.136909	0.285835	1.3587	0.442227	1.3587	1.36791	1.00678	-1.74294	3.21759
AC148477.3	12	132275391	132278330	+	11.6965	1.95316	1.25835	1.29961	0.20574	0.3783	1.35847	0.441986	1.35847	1.57302	1.15793	-1.24824	2.30356
MRPL3P1	13	19304593	19305626	-	21.2582	2.87855	2.30462	2.36202	0.12521	0.269706	1.35835	0.441858	1.35835	2.62151	1.92992	-1.11337	2.05429
STON2	14	81260656	81436466	-	71.5041	9.6201	7.81449	7.94489	0.0146309	0.0557675	1.35794	0.441423	1.35794	8.70935	6.41363	1.06315	1.73448
CARD6	5	40841308	40860176	+	114.372	17.383	12.4753	12.708	0.00230951	0.0133569	1.35746	0.440908	1.35746	15.9266	11.7326	1.1372	1.62038
HAUS6P1	7	53187388	53188939	+	31.6112	4.32412	3.46833	3.51236	0.0486738	0.135816	1.35665	0.440045	1.35665	3.94224	2.90587	1.00329	1.83445
SRGN	10	69088103	69104806	+	287.54	37.6817	31.6579	31.9488	6.62854e-05	0.000770434	1.35614	0.439506	1.35614	36.0548	26.5864	1.2043	1.52712
TIFA	4	112274537	112285905	-	48.5641	7.3192	5.29891	5.39601	0.0316469	0.0992878	1.35609	0.439448	1.35609	6.61246	4.87614	1.03369	1.77904
PCDHB8	5	141177790	141180540	+	12.8517	2.46429	1.32682	1.42797	0.322733	0.511685	1.35597	0.439329	1.35597	1.8645	1.37502	-1.3567	2.49453
DCP1A	3	53283429	53347587	-	278.655	35.9693	30.6511	30.9617	9.52561e-05	0.00103201	1.35596	0.439312	1.35596	34.439	25.3983	1.19913	1.53329
AC027097.1	18	57630302	57669297	+	11.0625	2.14716	1.1643	1.22916	0.275646	0.460296	1.35578	0.439123	1.35578	1.2305	0.907593	-1.3063	2.40115
MB21D2	3	192796815	192917857	-	166.77	24.1777	18.1378	18.5301	0.00795194	0.0350938	1.35564	0.438972	1.35564	19.6452	14.4915	1.09744	1.67458
ZBTB18	1	244048939	244057477	+	328.539	45.7448	36.0542	36.5043	7.99799e-05	0.000896249	1.3553	0.43861	1.3553	44.3655	32.7349	1.20097	1.52945
LEPROTL1	8	30095408	30177209	+	462.369	66.3293	50.7362	51.3743	3.51565e-05	0.000454598	1.35518	0.438488	1.35518	62.5409	46.1494	1.21278	1.51431
RPS6KC1	1	213051233	213274775	+	186.827	24.685	20.5704	20.7586	0.000339025	0.00289734	1.35501	0.438308	1.35501	23.9956	17.7087	1.1779	1.55876
PARTICL	2	85537462	85538667	-	11.2144	1.78076	1.21913	1.24604	0.219784	0.395518	1.35392	0.437143	1.35392	1.42481	1.05236	-1.22557	2.24659
TAOK3	12	118149801	118372908	-	260.61	35.0649	28.656	28.9567	0.000294303	0.00259225	1.35362	0.436818	1.35362	32.2924	23.8564	1.18272	1.54921
AC005000.1	X	115718942	115719230	-	52.4426	7.09918	5.7278	5.82695	0.030332	0.0963835	1.35349	0.436687	1.35349	6.40672	4.73347	1.0289	1.78049
MAML3	4	139716753	140154185	-	361.998	49.7656	39.805	40.222	5.82812e-05	0.000693103	1.35309	0.436254	1.35309	48.042	35.5055	1.205	1.51938
SUDS3P1	5	177971316	177972282	+	32.708	4.71029	3.53748	3.63422	0.126218	0.270916	1.35224	0.435351	1.35224	3.90294	2.88628	-1.06547	1.94827
CDC25B	20	3786772	3806122	+	3685.94	490.218	404.961	409.548	2.45037e-06	4.93281e-05	1.35182	0.434905	1.35182	445.738	329.731	1.24022	1.47347
DPY19L2	12	63558913	63668940	-	14.9359	2.25716	1.61045	1.65954	0.198636	0.369447	1.3497	0.432637	1.3497	1.90979	1.41497	-1.21165	2.20724
MIR503HG	X	134543119	134546643	-	68.0763	11.1292	6.90434	7.56403	0.135099	0.283044	1.34958	0.432505	1.34958	10.4194	7.72051	-1.12185	2.04328
TERF1P5	13	18680494	18681701	+	13.415	2.61891	1.39966	1.49056	0.243679	0.42284	1.34942	0.432344	1.34942	1.47093	1.09005	-1.30547	2.3772
AC008735.2	19	55661901	55674716	-	17.167	2.93818	1.83961	1.90744	0.169405	0.331518	1.34872	0.431593	1.34872	2.44109	1.80993	-1.14717	2.08676
MOCOS	18	36187497	36272158	+	185.287	24.3951	20.3963	20.5874	0.00031699	0.00275159	1.34866	0.431522	1.34866	24.2671	17.9936	1.17538	1.54747
ASB4	7	95478444	95540234	+	11.4129	2.66681	1.13974	1.2681	0.294131	0.481208	1.34793	0.430749	1.34793	1.07514	0.797618	-1.34756	2.44841
UBR1	15	42942897	43106114	-	191.743	27.4222	21.0368	21.3047	0.000476282	0.0037734	1.34766	0.430461	1.34766	25.8705	19.1965	1.16677	1.55661
MFSD12	19	3538261	3574291	-	1117.36	150.499	123.054	124.151	3.1444e-06	5.99104e-05	1.34737	0.43015	1.34737	146.253	108.547	1.2339	1.47128
ABCC1	16	15949577	16143075	+	5105.21	722.49	560.564	567.245	2.89154e-05	0.00038895	1.34699	0.429738	1.34699	682.707	506.84	1.20996	1.49953
NFIL3	9	91409045	91423833	-	57.1978	8.54823	6.19413	6.35531	0.0510699	0.140819	1.34624	0.428934	1.34624	7.39301	5.49161	-1.03631	1.87817
FKBP5	6	35573585	35728584	-	302.368	41.3451	33.2984	33.5964	0.000127527	0.00131519	1.34535	0.427981	1.34535	38.8999	28.9143	1.18828	1.52319
TATDN1	8	124488485	124539459	-	89.4417	13.0897	9.80097	9.93797	0.00954118	0.0403559	1.34517	0.427792	1.34517	10.8814	8.08923	1.0875	1.6639
NR1D2	3	23945286	23980618	+	243.324	34.4543	26.7235	27.036	0.000606714	0.0045586	1.34514	0.427757	1.34514	32.3044	24.0156	1.16333	1.55536
TNFRSF1A	12	6328757	6342115	-	4302.43	617.905	470.879	478.047	2.13187e-06	4.40668e-05	1.34498	0.427589	1.34498	592.602	440.601	1.23609	1.46348
TMTC2	12	82686880	83134871	+	94.4266	12.4647	10.3606	10.4918	0.00751632	0.0336737	1.34497	0.427571	1.34497	12.1985	9.06977	1.08615	1.66545
GAPDHP60	4	87207092	87208087	+	29.2179	4.18694	3.20483	3.24643	0.0744595	0.186162	1.34418	0.426722	1.34418	3.68061	2.73819	-1.02342	1.84913
KRT8P41	11	9094377	9095891	+	11.8008	1.9195	1.28263	1.3112	0.251039	0.431472	1.34401	0.426542	1.34401	1.51376	1.1263	-1.22459	2.21206
P4HA1	10	73007217	73096975	-	257.415	35.85	28.2369	28.6017	0.00224252	0.0130588	1.34374	0.426256	1.34374	33.5367	24.9577	1.13114	1.59631
MR1	1	181033425	181061939	+	87.5838	14.4796	9.38405	9.73153	0.0315338	0.0990413	1.34371	0.426224	1.34371	12.6383	9.40554	1.03982	1.73641
ST6GAL1	3	186930502	187078554	+	124.859	18.8409	13.6484	13.8733	0.0108334	0.0443778	1.34306	0.425521	1.34306	16.6014	12.3609	1.08116	1.6684
MALT1	18	58671465	58754478	+	342.511	47.8512	37.6838	38.0567	0.000387462	0.00321008	1.3419	0.424276	1.3419	43.84	32.6701	1.17019	1.53881
KIF18A	11	28020619	28108157	-	229.08	31.0148	25.1714	25.4534	0.00159386	0.0098909	1.34181	0.424181	1.34181	28.574	21.2951	1.14337	1.5747
FBXO7	22	32474676	32498830	+	740.933	101.88	81.6883	82.3259	2.85719e-06	5.56184e-05	1.34169	0.424054	1.34169	95.5245	71.197	1.23187	1.4613
ZCCHC9	5	81301587	81313298	+	104.356	13.7627	11.4694	11.5951	0.00492128	0.0241212	1.34157	0.423918	1.34157	12.9642	9.66347	1.10869	1.62336
DLX4	17	49968970	49974960	+	28.1317	3.82623	3.06552	3.12574	0.0739505	0.185179	1.34134	0.423678	1.34134	3.39419	2.53044	-1.05389	1.89615
RFESD	5	95646754	95684774	+	10.1416	1.87667	1.0422	1.12684	0.520771	0.692914	1.3413	0.423628	1.3413	1.16886	0.871444	-1.49885	2.69655
CIRBP-AS1	19	1267471	1270261	-	15.6787	2.40398	1.71053	1.74208	0.171815	0.334774	1.34122	0.423547	1.34122	2.01764	1.50433	-1.15128	2.071
ABCA11P	4	425435	474130	-	11.8638	1.92839	1.26536	1.3182	0.312185	0.500806	1.34103	0.423336	1.34103	1.54468	1.15187	-1.31696	2.36835
PLEKHO2	15	64841883	64868003	+	67.617	9.6373	7.42892	7.513	0.0117955	0.0475062	1.34088	0.423181	1.34088	8.89288	6.63212	1.07754	1.66858
SMCO4	11	93478472	93543392	-	39.2152	5.48943	4.27558	4.35724	0.0611786	0.160822	1.34028	0.422539	1.34028	5.03161	3.75414	-1.02959	1.84952
AL645608.7	1	995966	998052	-	36.3476	5.46601	3.91682	4.03862	0.0591685	0.157061	1.34019	0.422433	1.34019	4.08036	3.04462	-1.03424	1.85759
TASOR2	10	5684838	5763741	+	1528.71	205.331	168.544	169.857	2.00054e-06	4.20171e-05	1.3397	0.421909	1.3397	194.053	144.848	1.23366	1.45485
SAMD4A	14	54566117	54793316	+	293.151	42.4791	31.9915	32.5723	0.000983761	0.00670432	1.33966	0.421868	1.33966	40.3933	30.1519	1.15012	1.56044
ZEB1	10	31318495	31529815	+	255.606	36.0467	28.0189	28.4007	0.000527082	0.004093	1.33927	0.421451	1.33927	34.5377	25.7884	1.16209	1.54348
HIF1A	14	61695513	61748260	+	4230.4	592.314	462.818	470.044	2.17823e-05	0.000309826	1.33782	0.419883	1.33782	580.565	433.964	1.20695	1.48288
FKBP4	12	2794970	2805424	+	3123.07	424.415	343.635	347.008	2.60337e-06	5.13736e-05	1.33703	0.419035	1.33703	414.018	309.654	1.22848	1.45518
NME1-NME2	17	51153590	51171745	+	99.5377	17.2537	10.27	11.0597	0.169871	0.332203	1.33564	0.417531	1.33564	13.7322	10.2814	-1.24523	2.2214
PTPRO	12	15322257	15602176	+	29.2488	4.8969	3.02207	3.24986	0.117989	0.258508	1.33534	0.417207	1.33534	4.48043	3.35527	-1.08437	1.93357
CREBRF	5	173056352	173139285	+	26.6257	4.57454	2.82717	2.95841	0.240522	0.419544	1.3349	0.416736	1.3349	3.6346	2.72274	-1.18692	2.11506
PCM1	8	17922840	18029945	+	1280.69	170.789	141.24	142.299	1.74266e-06	3.74775e-05	1.33489	0.416724	1.33489	163.588	122.548	1.23131	1.44719
ZNF286B	17	18658429	18682229	-	12.5214	2.09176	1.27793	1.39127	0.246727	0.42671	1.33382	0.415561	1.33382	1.50699	1.12983	-1.52562	2.71419
PNRC1	6	89080751	89085161	+	344.719	50.6783	37.5337	38.3021	0.00291633	0.0159847	1.33341	0.415121	1.33341	47.4337	35.5732	1.11706	1.59167
AL138885.3	6	10404502	10407929	+	16.0303	2.54231	1.73518	1.78114	0.193497	0.362705	1.33336	0.415067	1.33336	1.95841	1.46878	-1.18495	2.10666
SAMD5	6	147508690	147737548	+	134.734	19.3202	14.705	14.9704	0.00257032	0.0144635	1.3333	0.415001	1.3333	18.6232	13.9678	1.12449	1.58088
SAR1A	10	70147289	70170524	-	793.029	103.723	87.4418	88.1143	3.91651e-06	7.23196e-05	1.33327	0.414971	1.33327	102.306	76.7328	1.22284	1.45368
MTHFD2	2	74198610	74217566	+	1700.71	226.465	187.243	188.968	5.09783e-05	0.000617499	1.33291	0.414583	1.33291	212.899	159.725	1.19427	1.48765
LY6E	8	143017982	143023833	+	1715.49	220.769	188.844	190.61	2.01502e-05	0.000290475	1.33276	0.41442	1.33276	211.179	158.452	1.20559	1.47335
CU633904.2	21	7430659	7469008	+	90.1571	14.4473	9.51038	10.0175	0.151822	0.306804	1.33272	0.414373	1.33272	11.707	8.78427	-1.17719	2.09085
AL358113.1	9	69035747	69255188	+	15.01	3.40773	1.41283	1.66777	0.473768	0.654149	1.33232	0.413941	1.33232	1.95103	1.46439	-1.77657	3.15354
PCNA	20	5114953	5126627	-	2750.08	350.444	302.467	305.565	1.09441e-06	2.59017e-05	1.33191	0.413498	1.33191	330.145	247.873	1.23344	1.43825
FAM72C	1	143955364	143971966	-	38.9388	6.70775	4.05574	4.32653	0.218564	0.393963	1.33132	0.412857	1.33132	4.82799	3.62647	-1.28277	2.27359
FYB1	5	39105252	39274529	-	103.177	13.8892	11.3043	11.4641	0.0131705	0.0516342	1.33066	0.412139	1.33066	12.7868	9.60942	1.06272	1.66614
TRABD2A	2	84821650	84907009	-	26.0767	4.80787	2.79471	2.89741	0.13476	0.2827	1.33028	0.411729	1.33028	3.68485	2.76998	-1.10387	1.95346
ELMO3	16	67199111	67204030	+	16.8329	2.74476	1.8151	1.87032	0.241256	0.420242	1.33004	0.411473	1.33004	2.09245	1.57322	-1.21108	2.14242
ZKSCAN4	6	28241697	28252270	-	32.4407	4.36271	3.55257	3.60452	0.060627	0.15984	1.32966	0.411052	1.32966	4.18891	3.15037	-1.03353	1.82727
LYAR	4	4267701	4290155	-	216.659	32.1408	23.76	24.0733	0.0060361	0.0282919	1.32953	0.410916	1.32953	26.9731	20.2877	1.10233	1.60356
E2F4	16	67192155	67198919	+	1017.33	138.34	112.136	113.036	1.38808e-05	0.000213046	1.32945	0.410832	1.32945	130.547	98.1959	1.20829	1.46277
ELAC1	18	50967991	50988122	+	27.4872	4.01249	2.96419	3.05414	0.132742	0.280232	1.32797	0.409219	1.32797	3.6829	2.77333	-1.12564	1.98506
SORD	15	45023147	45077186	+	585.227	80.9468	64.4602	65.0252	0.000115132	0.00121616	1.3278	0.409033	1.3278	74.9821	56.4712	1.18164	1.49203
ZBTB41	1	197153680	197200543	-	220.578	31.4722	24.2473	24.5087	0.00218786	0.0127976	1.32742	0.408627	1.32742	28.4559	21.437	1.1279	1.56224
PLAUR	19	43646095	43670548	-	348.364	50.1256	38.251	38.7071	0.000765228	0.00548293	1.32742	0.408621	1.32742	46.0511	34.6923	1.14906	1.53346
MVP	16	29820394	29848040	+	3156.21	447.633	345.45	350.69	4.03048e-07	1.10289e-05	1.32729	0.408485	1.32729	434.839	327.614	1.23735	1.42377
TMEM41A	3	185476496	185499058	-	266.024	34.9777	29.3144	29.5582	0.000299608	0.00262533	1.32728	0.408476	1.32728	33.9243	25.5592	1.16671	1.50996
RALY-AS1	20	33980679	33994358	-	16.8436	2.44242	1.81859	1.87151	0.205088	0.377585	1.32702	0.408189	1.32702	2.22625	1.67763	-1.20034	2.11377
CCR7	17	40553769	40565473	-	11.1324	2.01285	1.16895	1.23694	0.380957	0.569785	1.3265	0.40763	1.3265	1.52203	1.1474	-1.40434	2.47109
GOLGA2P5	12	100156357	100173660	-	16.5978	2.84237	1.77558	1.8442	0.233938	0.41241	1.32581	0.406873	1.32581	1.95453	1.47422	-1.23384	2.1688
MAST3	19	18097793	18151693	+	211.596	30.6487	23.2712	23.5107	0.0020805	0.0122846	1.32535	0.406372	1.32535	27.0469	20.4074	1.12735	1.55813
TMSB4XP4	9	128342153	128342771	+	29.3703	4.00657	3.22351	3.26336	0.0768592	0.190602	1.3249	0.405886	1.3249	3.74753	2.82853	-1.03857	1.82307
GAR1	4	109815510	109824741	+	146.453	19.3202	16.0843	16.2725	0.00556928	0.0265543	1.32388	0.404774	1.32388	18.4303	13.9214	1.09419	1.6018
RBM47	4	40423267	40630876	-	1198.74	165.903	131.908	133.193	0.000343182	0.00291725	1.32335	0.40419	1.32335	152.197	115.01	1.16392	1.50461
TXNP6	4	76958860	76959170	-	68.9015	9.5805	7.51677	7.65572	0.0516728	0.142046	1.32332	0.404167	1.32332	8.79299	6.64462	-1.00412	1.75841
SLC19A3	2	227683763	227718029	-	46.3329	7.12272	4.96523	5.1481	0.164698	0.325096	1.3232	0.404026	1.3232	6.02304	4.55189	-1.13327	1.98418
AC096887.2	3	53046166	53048123	+	18.7395	2.78365	1.89612	2.08217	0.170675	0.333141	1.32289	0.403691	1.32289	2.1666	1.63778	-1.52996	2.67749
SMG1P7	16	70219574	70246613	-	10.2986	1.55119	1.11261	1.14429	0.260651	0.442875	1.32231	0.403059	1.32231	1.16079	0.877853	-1.25955	2.20233
STAMBPL1	10	88879734	88975154	+	156.114	24.3951	17.042	17.346	0.0179541	0.0648626	1.32191	0.402627	1.32191	20.6184	15.5974	1.05414	1.6577
KIAA0040	1	175156986	175193000	-	46.9248	6.9744	5.10023	5.21386	0.0532858	0.145284	1.32162	0.402308	1.32162	5.35957	4.0553	1.00069	1.74548
AL360181.3	10	133380017	133420272	+	17.2018	2.52375	1.83722	1.91131	0.165647	0.326431	1.32031	0.40088	1.32031	2.34024	1.77249	-1.24393	2.16846
F12	5	177402140	177409577	-	584.265	76.9407	64.3923	64.9183	2.46954e-05	0.000343773	1.3201	0.400651	1.3201	75.9968	57.5689	1.19631	1.45671
DUSP5	10	110497907	110511534	+	198.513	26.4295	21.816	22.057	0.00345104	0.0182204	1.31962	0.400126	1.31962	24.6193	18.6563	1.11155	1.56665
TAF4B	18	26226445	26391686	+	116.45	16.2885	12.7584	12.9389	0.00542948	0.0260086	1.31888	0.399317	1.31888	13.6947	10.3835	1.0985	1.58348
CREM	10	35126791	35212959	+	182.374	24.4233	20.068	20.2637	0.00248655	0.0141231	1.31881	0.399238	1.31881	22.7874	17.2787	1.12075	1.55188
AC018638.2	7	128652841	128653244	+	14.1694	2.17297	1.53576	1.57437	0.176607	0.341104	1.31872	0.399134	1.31872	1.60456	1.21676	-1.17619	2.04541
AC139256.3	16	15104723	15131602	-	49.526	8.30614	5.2985	5.50289	0.145473	0.297532	1.31867	0.399083	1.31867	6.2637	4.75002	-1.14833	1.99683
HSPD1P3	8	7418991	7420547	+	10.9456	2.04785	1.15608	1.21617	0.351897	0.542417	1.31853	0.398927	1.31853	1.33797	1.01475	-1.40329	2.43963
SAT1	X	23783173	23786227	+	961.725	137.289	105.455	106.858	2.80971e-05	0.000380078	1.31846	0.398859	1.31846	130.393	98.8974	1.19428	1.45556
SETX	9	132261356	132354987	-	506.339	70.8275	55.7133	56.2599	0.000240522	0.00220648	1.31819	0.398562	1.31819	66.1573	50.1878	1.16527	1.49118
EPB41	1	28887091	29120047	+	260.417	35.4063	28.689	28.9352	0.00088049	0.00614333	1.31774	0.398064	1.31774	32.8886	24.9584	1.14658	1.51445
LINC00869	1	149606334	149705717	+	17.9182	2.52187	1.96223	1.99091	0.149883	0.304127	1.31718	0.397448	1.31718	2.26003	1.71582	-1.13076	1.96182
LACTB	15	63121833	63142062	+	491.646	70.3041	53.768	54.6273	4.80935e-05	0.000589013	1.31716	0.397429	1.31716	67.6461	51.3576	1.18743	1.46106
AC010761.1	17	28721487	28722878	-	14.1784	2.1869	1.53424	1.57538	0.223137	0.399749	1.31706	0.39732	1.31706	1.82789	1.38786	-1.23084	2.13506
LRRC24	8	144522388	144527034	-	26.2207	4.40997	2.7755	2.91342	0.136355	0.285093	1.31691	0.397153	1.31691	2.85498	2.16794	-1.17087	2.03058
SNX6	14	34561093	34630161	-	761.74	104.389	83.5682	84.6378	8.96795e-06	0.000147914	1.31686	0.397107	1.31686	103.329	78.4656	1.20451	1.4397
HSD3B7	16	30985207	30989148	+	438.154	66.385	47.7311	48.6838	0.000182437	0.0017661	1.31685	0.397096	1.31685	61.1096	46.4057	1.17107	1.48079
JADE2	5	134524312	134583231	+	1042.38	138.602	115.05	115.82	2.60108e-06	5.13736e-05	1.31681	0.397045	1.31681	131.662	99.9861	1.21619	1.42575
ADCK1	14	77800109	77935015	+	62.9912	8.85487	6.89607	6.99902	0.0317787	0.099658	1.31668	0.396909	1.31668	7.50714	5.70155	1.03073	1.68197
EAPP	14	34515938	34539712	-	146.078	20.411	16.032	16.2309	0.00754016	0.0337243	1.31609	0.396254	1.31609	19.0585	14.4812	1.08696	1.59351
SMG1	16	18804860	18926409	-	1481.43	208.441	163.204	164.604	5.24823e-05	0.00063358	1.316	0.396155	1.316	191.552	145.557	1.18657	1.45954
AOC2	17	42844580	42850708	+	19.9929	2.87855	2.17639	2.22144	0.192551	0.361593	1.31547	0.395582	1.31547	2.55787	1.94445	-1.14657	1.98411
STX4	16	31032889	31042976	+	438.1	63.5696	47.9493	48.6778	3.65753e-05	0.000469192	1.31459	0.394615	1.31459	60.1284	45.7392	1.18922	1.45318
PAX9	14	36657568	36679363	+	64.1429	8.53678	7.05538	7.12699	0.023002	0.0782307	1.31426	0.394252	1.31426	8.09841	6.16195	1.04349	1.6553
AC136632.1	5	178055604	178056195	+	302.261	53.841	32.9784	33.5845	0.0349244	0.106932	1.31404	0.394011	1.31404	39.2593	29.8768	1.05199	1.64137
CTNNBL1	20	37693955	37872130	+	489.243	65.6175	53.928	54.3604	3.83065e-05	0.000489461	1.314	0.393967	1.314	63.6252	48.421	1.18823	1.45308
BTNL9	5	181040225	181061522	+	21.9075	3.29431	2.39526	2.43417	0.126119	0.270874	1.31386	0.393816	1.31386	2.8534	2.17176	-1.10641	1.90992
PLA2R1	2	159932006	160062616	-	42.7014	7.93765	4.55777	4.7446	0.112441	0.249588	1.3134	0.393309	1.3134	6.14176	4.67622	-1.04815	1.80809
TBKBP1	17	47694081	47712051	+	79.3482	10.9788	8.71287	8.81647	0.0124018	0.0492304	1.31297	0.392839	1.31297	10.5368	8.0251	1.06984	1.61136
TMEM243	7	87196160	87220588	-	107.881	14.9379	11.8635	11.9867	0.00884227	0.0380323	1.31273	0.392574	1.31273	13.1447	10.0133	1.08825	1.58353
NMT1	17	45051610	45109017	+	1539.98	196.61	170.02	171.109	9.97517e-07	2.39237e-05	1.31232	0.392114	1.31232	194.591	148.281	1.22027	1.4113
AF127577.4	21	14818843	15014431	-	28.9869	5.48943	3.03346	3.22077	0.155719	0.312108	1.31225	0.39204	1.31225	4.29065	3.26969	-1.12612	1.93918
HIC1	17	2054154	2063242	+	17.4242	3.3388	1.79623	1.93603	0.333356	0.523356	1.31214	0.391922	1.31214	1.97016	1.50149	-1.40966	2.42702
LINC02593	1	916865	921017	-	48.0987	8.72268	5.01983	5.3443	0.546402	0.71328	1.31196	0.391725	1.31196	5.90384	4.50001	-1.29987	2.23738
PRR3	6	30557280	30563724	+	158.778	22.3215	17.419	17.642	0.00761792	0.0339662	1.3115	0.391222	1.3115	19.1797	14.6242	1.0879	1.58107
RNASEL	1	182573634	182589257	-	68.0258	9.42048	7.43525	7.55843	0.0420871	0.122398	1.31148	0.391198	1.31148	8.62096	6.57345	-1.00448	1.72769
RALA	7	39623565	39708121	+	304.7	41.902	33.5245	33.8556	8.0153e-05	0.000897488	1.31119	0.390876	1.31119	40.5588	30.9328	1.17799	1.45945
NUP54	4	76114659	76148445	-	179.794	23.0618	19.8155	19.9771	0.00105233	0.00707101	1.31107	0.390744	1.31107	22.1324	16.8812	1.13665	1.51225
AC022182.3	8	60937705	60939872	-	22.2304	3.16178	2.40066	2.47004	0.15092	0.305585	1.31103	0.390699	1.31103	2.58565	1.97223	-1.15333	1.98234
NPC1	18	23506184	23586507	-	482.809	65.8432	53.1363	53.6455	7.38873e-05	0.000838439	1.31101	0.390683	1.31101	63.7374	48.6169	1.17869	1.4582
MAT2B	5	163503114	163519355	+	330.461	44.747	36.4421	36.7179	0.000133072	0.00135391	1.31088	0.390537	1.31088	42.5421	32.4531	1.17074	1.4678
AC109460.3	16	28974804	28990776	+	23.2448	3.4431	2.48655	2.58276	0.163059	0.322482	1.30966	0.389191	1.30966	2.85707	2.18153	-1.22468	2.10057
AC012510.1	2	218633256	218634015	-	21.6514	4.10614	2.32837	2.40571	0.242486	0.421559	1.30948	0.388995	1.30948	2.90582	2.21906	-1.18349	2.02938
SLC35F6	2	26764284	26781232	+	2400.14	344.993	262.781	266.682	1.31774e-06	2.99536e-05	1.3085	0.387916	1.3085	329.013	251.443	1.21595	1.4081
NPIPB9	16	28751787	28772808	+	23.4998	3.22325	2.56271	2.61108	0.122938	0.266197	1.30821	0.387598	1.30821	3.08555	2.3586	-1.11151	1.90226
PTPN2	18	12785478	12929644	-	191.035	24.306	21.038	21.2261	0.00198572	0.0118467	1.30787	0.387222	1.30787	24.1123	18.4363	1.11721	1.53107
TCIRG1	11	68039025	68050896	+	1561.53	216.097	171.852	173.503	3.19557e-05	0.000421866	1.30786	0.387206	1.30786	205.725	157.299	1.1864	1.44175
AC004967.2	7	97966377	97970405	-	18.2433	2.62506	1.98248	2.02703	0.203073	0.375174	1.30776	0.387099	1.30776	2.17398	1.66237	-1.16735	1.99645
ACOT13	6	24667035	24705066	+	372.538	46.7663	41.0323	41.3931	0.000124724	0.00129099	1.30759	0.386908	1.30759	44.9672	34.3894	1.16906	1.46253
B4GALT5	20	49632945	49713879	-	1246.27	174.626	137.006	138.474	0.000250063	0.00227368	1.30743	0.386736	1.30743	164.044	125.471	1.15998	1.47363
ARL4D	17	43398993	43401138	+	76.6137	12.4426	8.26885	8.51264	0.0414816	0.121222	1.30738	0.386675	1.30738	10.777	8.24324	1.01763	1.67963
CLDN2	X	106900164	106930862	+	2036.17	328.816	221.445	226.241	0.0060776	0.02847	1.30737	0.386668	1.30737	278.629	213.122	1.09611	1.55934
MRPL32	7	42932376	42948959	+	294.358	41.0442	32.4206	32.7065	0.000814416	0.00575783	1.30719	0.386473	1.30719	37.8576	28.9609	1.14034	1.49846
EPM2A	6	145382535	145736024	-	29.8384	4.70078	3.18333	3.31538	0.170262	0.332696	1.30591	0.385055	1.30591	3.79683	2.90742	-1.21544	2.07281
CNBP	3	129167827	129183923	-	2085.37	290.603	229.826	231.708	2.60111e-05	0.000358959	1.30578	0.384914	1.30578	270.321	207.018	1.18779	1.43549
SMPDL3B	1	27935000	27959158	+	43.2416	5.93146	4.66615	4.80462	0.121662	0.264057	1.30559	0.384702	1.30559	5.8877	4.50961	-1.08493	1.84934
PLAAT3	11	63573195	63616884	-	324.88	41.186	35.8332	36.0978	0.00010281	0.00109976	1.30452	0.383517	1.30452	39.676	30.4143	1.17115	1.45307
PPP1R2B	5	156850295	156852529	+	9.72924	1.51945	1.05329	1.08103	0.333052	0.523195	1.30448	0.383471	1.30448	1.16326	0.891744	-1.32538	2.25534
SUMO1P4	19	49275119	49275421	+	23.7993	3.77299	2.57949	2.64437	0.189032	0.356896	1.30413	0.383091	1.30413	3.00359	2.30313	-1.15773	1.96903
TLR1	4	38790677	38856818	-	13.2597	2.4007	1.35811	1.4733	0.324829	0.514214	1.30384	0.382765	1.30384	1.99883	1.53303	-1.3168	2.23856
OSMR	5	38845858	38945597	+	1028.22	143.486	113.121	114.246	4.30643e-06	7.82125e-05	1.30324	0.382098	1.30324	136.952	105.086	1.20305	1.41176
RAB24	5	177301198	177303745	-	284.358	37.2034	31.3564	31.5954	0.000567197	0.00433423	1.30319	0.382052	1.30319	35.5436	27.2742	1.14564	1.48241
GLRX	5	95751319	95822727	-	428.221	61.2977	46.7951	47.5801	0.0212397	0.073685	1.30317	0.382025	1.30317	54.4188	41.7588	1.04534	1.62459
PBLD	10	68282660	68333050	-	60.9162	9.94384	6.584	6.76846	0.129873	0.27608	1.30297	0.3818	1.30297	8.11201	6.2258	-1.07159	1.81926
GTF2E2	8	30578318	30658237	-	386.658	49.0571	42.6457	42.962	0.000112371	0.00119226	1.30291	0.381737	1.30291	47.3921	36.374	1.16922	1.45189
DNAJC19P9	14	45290036	45290387	+	14.1112	2.19583	1.47894	1.56791	0.231988	0.410183	1.30277	0.381584	1.30277	2.05305	1.57591	-1.27297	2.1605
TXNL4B	16	72044289	72094432	-	203.521	28.1742	22.3962	22.6134	0.00248998	0.0141276	1.30235	0.381116	1.30235	26.3152	20.206	1.11335	1.52343
PGBD2	1	248906196	248919947	+	36.1819	5.67241	3.91522	4.02021	0.27964	0.465127	1.30232	0.381088	1.30232	4.48503	3.44387	-1.13243	1.92066
TMEM126B	11	85628573	85636540	+	130.153	18.3409	14.337	14.4615	0.00444367	0.0222199	1.30224	0.380997	1.30224	16.7869	12.8908	1.10175	1.53922
DTNBP1	6	15522807	15663059	-	69.9252	10.4169	7.6435	7.76947	0.0627536	0.163972	1.30218	0.38093	1.30218	9.05866	6.95653	-1.0056	1.70516
SRPX	X	38149336	38220925	-	122.548	19.3642	13.2453	13.6165	0.00710551	0.032252	1.30081	0.379408	1.30081	17.4097	13.3838	1.08876	1.55415
FKBP4P7	9	62710036	62711399	-	36.2174	5.40312	3.93356	4.02416	0.150921	0.305585	1.30057	0.379141	1.30057	4.65444	3.57877	-1.10361	1.86673
CPT1B	22	50568861	50578466	-	88.2827	13.127	9.63931	9.80919	0.0383797	0.114533	1.30049	0.37905	1.30049	11.5026	8.84484	1.00171	1.68838
ANKRD44	2	196967017	197311174	-	25.5776	3.29431	2.80476	2.84195	0.106328	0.2397	1.30039	0.378947	1.30039	3.21225	2.47022	-1.08623	1.83683
SPTBN1	2	54456317	54671447	+	12363.3	1625.32	1362.28	1373.7	2.90131e-06	5.64009e-05	1.30028	0.378823	1.30028	1623.55	1248.62	1.20394	1.40433
ADPRM	17	10697594	10711559	+	20.9922	2.76012	2.29353	2.33247	0.137068	0.286043	1.29994	0.378443	1.29994	2.61434	2.01113	-1.13506	1.91807
DOC2A	16	30005514	30023271	-	41.481	5.81461	4.53192	4.609	0.0552311	0.149145	1.29956	0.378022	1.29956	4.76657	3.66784	-1.01077	1.70705
ERVK3-1	19	58305319	58315664	+	399.058	51.1819	44.0396	44.3398	0.000134724	0.00136684	1.29894	0.377338	1.29894	49.8384	38.3684	1.16406	1.44946
VIM	10	17228241	17237594	+	19620.3	2688.87	2161.12	2180.04	2.22377e-06	4.57035e-05	1.29848	0.37682	1.29848	2589.88	1994.55	1.20522	1.39895
CSTF2T	10	51695486	51699596	-	387.437	49.021	42.7513	43.0486	0.000116329	0.001227	1.29807	0.376363	1.29807	47.6986	36.7459	1.16593	1.44518
TBC1D3L	17	37977972	37989049	-	30.8033	4.6184	3.34311	3.42259	0.11653	0.256132	1.29802	0.376314	1.29802	3.92927	3.02712	-1.12723	1.89923
AL135999.1	14	23561097	23568074	+	47.0444	7.43298	5.06345	5.22716	0.119427	0.260922	1.2978	0.376071	1.2978	6.48205	4.99463	-1.07522	1.81098
CAST	5	96525267	96779596	+	2246.53	306.711	247.909	249.614	2.59029e-05	0.000357808	1.29744	0.375667	1.29744	283.659	218.63	1.18339	1.42248
NOL8	9	92297358	92325637	-	245.536	32.6751	27.077	27.2818	0.000968422	0.00663757	1.2973	0.375515	1.2973	30.578	23.5705	1.133	1.48543
MIS12	17	5486285	5490815	+	115.893	15.8479	12.7551	12.8769	0.0133411	0.0521659	1.29722	0.375428	1.29722	14.5066	11.1828	1.07036	1.57217
KCTD14	11	78015715	78046192	-	14.1033	2.24783	1.43134	1.56703	0.241235	0.420242	1.29699	0.375165	1.29699	1.82062	1.40373	-1.61127	2.71044
PCGF5	10	91163012	91284338	+	711.911	92.1981	78.3732	79.1012	0.000239578	0.00219922	1.29597	0.374031	1.29597	85.664	66.1004	1.1545	1.45477
GCH1	14	54842008	54902827	-	57.3737	8.36918	6.21726	6.37486	0.0509442	0.140608	1.29531	0.3733	1.29531	7.91437	6.11001	-1.01828	1.70851
TOB2	22	41433494	41446802	-	583.784	77.8572	64.2333	64.8649	0.00171921	0.0105009	1.29531	0.373297	1.29531	74.213	57.2937	1.11839	1.50022
ZCCHC2	18	62523025	62587710	+	269.621	34.0182	29.7542	29.9579	0.000194194	0.00185615	1.29505	0.373009	1.29505	32.861	25.3743	1.15823	1.44804
ABCD4	14	74285269	74303056	-	167.92	22.9484	18.4138	18.6577	0.00903585	0.0386797	1.29483	0.372763	1.29483	21.9681	16.966	1.06898	1.56839
AC011445.1	19	39314651	39320859	-	46.4032	7.80354	5.03053	5.15591	0.140277	0.290423	1.29442	0.372307	1.29442	6.09983	4.7124	-1.08774	1.82253
PDIA3P1	1	147172744	147179623	+	388.403	50.6488	42.8864	43.1559	0.000100179	0.00107722	1.29411	0.371963	1.29411	48.7509	37.6713	1.16603	1.43627
CDADC1	13	49247925	49293486	+	18.4794	3.11625	1.93129	2.05326	0.419667	0.606306	1.2937	0.371503	1.2937	2.35649	1.82151	-1.40195	2.3464
SELENOI	2	26308547	26395892	+	1087.22	143.819	119.758	120.802	0.000121592	0.00126763	1.29303	0.370751	1.29303	141.284	109.266	1.16171	1.43918
ADCY7	16	50246137	50318136	+	432.434	65.0814	46.9592	48.0482	0.00326337	0.0174541	1.29295	0.370662	1.29295	60.0127	46.4155	1.10135	1.51787
XAGE1B	X	52512077	52520804	-	28.0147	6.40966	2.57319	3.11274	0.224133	0.401133	1.29284	0.370545	1.29284	3.85779	2.98396	-1.81954	3.04125
CHKB-DT	22	50583026	50595635	+	16.4651	2.23188	1.785	1.82945	0.234058	0.412473	1.29268	0.370361	1.29268	2.02277	1.56479	-1.22705	2.05042
XPO6	16	28097979	28211921	-	1541.14	207.716	169.862	171.238	4.48833e-06	8.10042e-05	1.29251	0.370173	1.29251	201.86	156.177	1.19563	1.39723
UBXN4	2	135741734	135785057	+	799.108	115.458	87.5837	88.7897	0.00142212	0.00905949	1.29233	0.369973	1.29233	106.548	82.4463	1.12186	1.4887
MYL12AP1	8	93849561	93850076	+	10.8053	1.74919	1.13996	1.20059	0.377288	0.566484	1.29193	0.369523	1.29193	1.39802	1.08212	-1.44472	2.41133
TFAP4	16	4257186	4273076	-	310.201	40.421	34.1833	34.4668	0.00139183	0.00891837	1.29179	0.369368	1.29179	39.0824	30.2545	1.12143	1.48803
CNDP2	18	74495816	74523455	+	1042.68	137.73	115.172	115.853	3.86598e-06	7.1662e-05	1.29175	0.369331	1.29175	132.406	102.501	1.19657	1.39451
KRT18P11	X	92459670	92460953	+	82.7071	12.7195	9.05073	9.18968	0.0680567	0.174216	1.29171	0.369285	1.29171	10.1455	7.85433	-1.00003	1.66857
AC036176.1	18	63367328	63381630	+	10.3665	1.55541	1.12899	1.15183	0.338804	0.52909	1.29143	0.36897	1.29143	1.28112	0.992016	-1.3039	2.17463
ARSJ	4	113900284	113979728	-	177.221	23.7718	19.4933	19.6912	0.00818989	0.0358161	1.29109	0.368589	1.29109	22.4176	17.3633	1.07966	1.54393
CCNG1	5	163437569	163446152	+	721.217	96.2972	79.3407	80.1352	1.96413e-05	0.000285017	1.29086	0.368333	1.29086	95.8733	74.2708	1.18119	1.41071
DYRK3	1	206635536	206684420	+	177.189	24.395	19.5246	19.6877	0.002576	0.0144898	1.29076	0.368224	1.29076	22.8537	17.7056	1.11152	1.49891
JUN	1	58780791	58784048	-	1179	173.92	128.773	131	0.0005354	0.00414416	1.29075	0.368207	1.29075	161.115	124.823	1.14147	1.45955
USO1	4	75724593	75814287	+	639.56	88.709	70.1173	71.0622	0.00242165	0.0138438	1.29043	0.367853	1.29043	84.6198	65.5749	1.1077	1.5033
FO681492.1	10	47750864	47763593	-	90.8279	12.3475	9.92317	10.092	0.0266634	0.0875135	1.29025	0.367647	1.29025	10.5901	8.20778	1.02239	1.62827
RNF181	2	85595725	85597709	+	411.969	61.0229	45.3028	45.7743	0.000608743	0.00457146	1.28992	0.367283	1.28992	54.2918	42.0892	1.1392	1.46058
ITGB4	17	75721328	75757819	+	3328.36	532.059	356.023	369.818	0.00103406	0.00697739	1.28983	0.367177	1.28983	482.423	374.021	1.12776	1.47519
SYT3	19	50621307	50639882	-	20.3597	2.87855	2.21974	2.26219	0.193079	0.362254	1.2897	0.367035	1.2897	2.67021	2.07041	-1.15479	1.92079
RRAGC	1	38838198	38859773	-	159.082	24.8207	17.462	17.6758	0.0161623	0.0600789	1.28957	0.366889	1.28957	20.4618	15.8671	1.05996	1.56892
ENDOD1	11	95089846	95132646	+	413.278	60.7204	45.4907	45.9198	0.000369642	0.00310543	1.28952	0.36683	1.28952	54.2271	42.0523	1.14721	1.44948
RPL13AP3	14	55766177	55767718	+	12.8337	2.49302	1.32386	1.42597	0.40088	0.588077	1.2892	0.36648	1.2892	1.72749	1.33997	-1.50553	2.50225
CEP57L1	6	109095110	109163933	+	42.005	5.67241	4.60198	4.66722	0.0713362	0.180172	1.28919	0.36647	1.28919	5.32821	4.13298	-1.04833	1.74235
LINC02846	9	136107808	136109425	-	12.3133	2.00629	1.30601	1.36814	0.327667	0.516771	1.2891	0.366365	1.2891	1.72065	1.33476	-1.32232	2.1974
ZNF383	19	37217926	37248739	+	21.8201	3.06101	2.36862	2.42446	0.209784	0.383332	1.289	0.366252	1.289	2.73693	2.1233	-1.185	1.9689
FADS3	11	61873519	61892052	-	415.219	61.2061	44.4899	46.1355	0.000141688	0.00142941	1.28881	0.366035	1.28881	60.3189	46.8022	1.15753	1.43497
SRFBP1	5	121961975	122075571	+	121.024	17.9473	13.2396	13.4471	0.0151032	0.0571478	1.28834	0.365514	1.28834	13.9704	10.8437	1.05859	1.56796
FTSJ3	17	63819433	63830013	-	998.166	128.118	110.197	110.907	3.96313e-05	0.000502953	1.28759	0.364673	1.28759	125.985	97.8458	1.17195	1.41465
BEST3	12	69643360	69699477	-	15.3738	2.56179	1.5702	1.7082	0.250971	0.431472	1.28747	0.364539	1.28747	2.11628	1.64375	-1.50321	2.49169
NUP160	11	47778087	47848556	-	513.022	65.9427	56.6166	57.0025	0.000216178	0.00202452	1.2874	0.364455	1.2874	64.022	49.7298	1.15174	1.43903
RGS9	17	65100812	65227704	+	49.276	6.86176	5.39892	5.47511	0.0632761	0.164888	1.28733	0.364387	1.28733	6.19529	4.81249	-1.03534	1.71579
AL158050.1	6	51410081	51410538	-	48.8932	7.5166	5.36385	5.43258	0.0804019	0.19666	1.28701	0.364024	1.28701	6.2102	4.82529	-1.02478	1.69744
KREMEN1	22	29073078	29168334	+	196.48	25.9086	21.6387	21.8311	0.00174746	0.0106554	1.28665	0.363617	1.28665	25.6085	19.9033	1.11627	1.48303
NGDN	14	23469689	23509863	+	225.212	29.734	24.8018	25.0236	0.00357596	0.0186944	1.28651	0.363467	1.28651	27.3221	21.2373	1.10605	1.49642
ADM	11	10305073	10307398	+	643.05	90.9645	70.4461	71.4501	0.0130769	0.0513567	1.28629	0.363219	1.28629	79.2977	61.6482	1.0583	1.5634
L2HGDH	14	50237563	50312230	-	190.481	25.5525	20.9422	21.1646	0.00303984	0.0164856	1.28618	0.363096	1.28618	22.4693	17.4698	1.10759	1.49357
PPARGC1B	5	149730298	149855023	+	172.531	23.8609	18.9706	19.1702	0.0114107	0.0462806	1.28609	0.362991	1.28609	21.8203	16.9664	1.06796	1.54878
ADAT2	6	143422832	143450696	-	32.4095	4.8969	3.46101	3.60105	0.32168	0.510584	1.28566	0.362509	1.28566	3.733	2.90357	-1.20112	1.98535
AL035458.2	20	34234840	34281174	-	10.8215	1.76692	1.14344	1.20239	0.300025	0.48774	1.28539	0.362203	1.28539	1.18597	0.922655	-1.38948	2.29573
FABP5	8	81280536	81284778	+	233.807	30.09	25.7685	25.9786	0.00259984	0.014601	1.28521	0.361999	1.28521	29.4284	22.8978	1.10664	1.49258
MLF1	3	158571163	158607253	+	31.0536	4.7103	3.34754	3.4504	0.149879	0.304127	1.28485	0.361595	1.28485	4.31176	3.35586	-1.10006	1.81601
PCDHA4	5	140806929	141012348	+	137.128	20.0252	14.9249	15.2365	0.018461	0.0663394	1.28484	0.361584	1.28484	18.7801	14.6168	1.05215	1.56898
MBD5	2	148021011	148516972	+	114.306	16.2136	12.5508	12.7006	0.0222439	0.0763209	1.28438	0.361077	1.28438	14.6077	11.3733	1.03799	1.58926
LSM12	17	44034328	44067620	-	555.103	74.4489	61.2744	61.6781	4.29726e-05	0.000537288	1.28425	0.360931	1.28425	71.2866	55.5082	1.17011	1.40954
IFT122	3	129440036	129520508	+	241.444	31.227	26.6041	26.8271	0.00275377	0.0152685	1.284	0.36064	1.284	29.7641	23.1809	1.10402	1.49331
NRSN2	20	346782	359661	+	1029.52	142.613	112.882	114.391	4.39053e-05	0.000546787	1.2837	0.360311	1.2837	139.077	108.341	1.16909	1.40955
AP1AR	4	112231740	112273111	+	129.11	16.4858	14.2339	14.3455	0.00392543	0.020172	1.28237	0.358812	1.28237	15.4785	12.0702	1.09772	1.49808
AC080023.2	11	10272052	10272260	-	12.5709	2.17183	1.34575	1.39676	0.338359	0.528585	1.28236	0.358799	1.28236	1.51269	1.17961	-1.3439	2.20997
TMEM179B	11	62787402	62790401	+	495.812	65.6338	54.7152	55.0902	0.00034389	0.00292154	1.28229	0.358723	1.28229	61.7811	48.1803	1.14281	1.4388
AL589182.2	14	19131842	19132891	-	15.3163	2.41696	1.63735	1.70181	0.282539	0.467998	1.28225	0.35868	1.28225	1.63431	1.27456	-1.22694	2.01729
RCAN1	21	34513142	34615114	-	149.583	18.7553	16.46	16.6203	0.00690175	0.0315064	1.28181	0.358185	1.28181	17.997	14.0403	1.07781	1.52443
CENPN	16	81006498	81033115	+	308.138	38.5513	33.9747	34.2376	0.000418336	0.00341467	1.28141	0.357728	1.28141	36.982	28.8604	1.13918	1.44139
AC245060.7	22	22298124	22329123	+	30.6691	6.11591	3.22024	3.40768	0.248678	0.428924	1.28097	0.357238	1.28097	3.2073	2.5038	-1.20125	1.97112
PCED1A	20	2835314	2841191	-	387.697	55.5564	42.5907	43.0774	0.000282415	0.00250907	1.28073	0.356969	1.28073	51.7626	40.4164	1.14623	1.43102
AC109322.1	8	144078002	144079266	-	31.8338	5.0277	3.48162	3.53709	0.121297	0.263543	1.28063	0.356852	1.28063	4.20808	3.28595	-1.07324	1.76013
RPL23AP65	11	9606142	9606610	+	23.2269	3.44075	2.53886	2.58077	0.17277	0.335907	1.28016	0.356325	1.28016	2.85485	2.23007	-1.13815	1.86522
KDM6A	X	44873177	45112780	+	218.994	28.8272	24.1507	24.3327	0.00248268	0.0141084	1.28014	0.356304	1.28014	27.0068	21.0967	1.10737	1.47987
TNFAIP8	5	119268692	119399689	+	287.102	39.7088	31.5707	31.9002	0.00133052	0.00859839	1.27999	0.356136	1.27999	37.7635	29.5029	1.11776	1.46578
ZNF606	19	57977053	58003350	-	14.0523	2.40941	1.42036	1.56137	0.379776	0.568675	1.27962	0.355713	1.27962	1.70354	1.33129	-1.6283	2.66622
NMRAL2P	3	185959943	185980873	+	81.3069	10.6417	8.94919	9.03409	0.0231876	0.0787128	1.27947	0.35555	1.27947	9.82767	7.68103	1.03771	1.57756
ZNF138	7	64794388	64833682	+	27.0347	4.26351	2.87921	3.00386	0.234416	0.4128	1.27925	0.355302	1.27925	3.07518	2.40389	-1.2348	2.02074
CU634019.2	21	7048891	7087230	+	130.613	17.8744	14.3165	14.5125	0.0240066	0.0808618	1.27924	0.355289	1.27924	16.0031	12.5098	1.02349	1.5989
IRF3	19	49659569	49665876	-	819.074	105.018	90.4499	91.0082	7.85315e-05	0.000882083	1.27915	0.35519	1.27915	101.795	79.58	1.16042	1.41004
IL6R	1	154405193	154469451	+	176.432	23.2022	19.3791	19.6036	0.0139942	0.0540289	1.27888	0.354883	1.27888	22.2962	17.4341	1.04968	1.55812
C1QTNF6	22	37180166	37199386	-	324.095	48.029	35.3195	36.0106	0.0439454	0.126105	1.27839	0.354328	1.27839	42.1052	32.9361	1.00503	1.6261
AP002381.2	11	72793624	72814055	-	10.4765	1.42124	1.13986	1.16405	0.279241	0.46468	1.27806	0.353953	1.27806	1.24675	0.9755	-1.31106	2.14153
SNX7	1	98661701	98760501	+	208.842	27.4762	23.024	23.2046	0.00277003	0.0153423	1.27806	0.35395	1.27806	26.5706	20.7898	1.10172	1.48261
AC090192.2	8	124271667	124279581	+	23.2608	3.53374	2.51781	2.58453	0.233371	0.411616	1.27794	0.353821	1.27794	2.73392	2.13932	-1.18747	1.9393
RBM17P4	15	35298249	35299441	-	20.3818	3.14481	2.21081	2.26465	0.280318	0.465873	1.27758	0.353416	1.27758	2.52464	1.97611	-1.20959	1.97431
DPAGT1	11	119096503	119108332	-	416.057	54.0382	45.9835	46.2286	5.13845e-05	0.000621896	1.27752	0.353346	1.27752	52.3761	40.9982	1.16427	1.40179
ZBTB42	14	104800596	104804713	+	117.609	15.8276	12.9517	13.0677	0.0105707	0.0435626	1.27665	0.352358	1.27665	15.1167	11.841	1.06505	1.53028
AC118553.2	1	99970011	100083322	+	58.3082	8.7932	6.19075	6.47869	0.150341	0.304885	1.27616	0.351809	1.27616	7.35978	5.76713	-1.24143	2.02178
CNTD1	17	42798800	42811588	+	11.5433	1.64961	1.23723	1.28258	0.257143	0.438471	1.2761	0.351745	1.2761	1.55519	1.2187	-1.34746	2.19425
FAM153CP	5	178006348	178086530	+	18.6054	3.32946	2.01904	2.06727	0.279318	0.464754	1.27603	0.351663	1.27603	2.48753	1.94943	-1.18829	1.93484
ORC1	1	52372829	52404424	-	298.307	41.9782	32.5904	33.1452	0.00103451	0.00697739	1.27596	0.351584	1.27596	33.2982	26.0965	1.12308	1.44965
RSL24D1P11	18	57838476	57838967	+	20.2202	2.91849	2.21338	2.24669	0.177611	0.342262	1.27573	0.351327	1.27573	2.37153	1.85895	-1.13933	1.85425
SERPINB9	6	2887270	2903310	-	354.712	51.8122	38.8804	39.4124	0.00211847	0.012478	1.27527	0.3508	1.27527	47.4443	37.2034	1.10868	1.46689
COMMD10	5	116085016	116412763	+	130.42	17.4453	14.3632	14.4911	0.0106313	0.0437495	1.27521	0.35074	1.27521	16.6448	13.0526	1.06562	1.52603
DNAJC7	17	41976421	42021377	-	723.532	95.4517	79.9065	80.3925	3.34457e-05	0.000437514	1.27469	0.350145	1.27469	92.3258	72.4301	1.16722	1.39205
GLMN	1	92246402	92298988	-	39.7473	5.4311	4.35853	4.41637	0.0960283	0.223589	1.27461	0.350055	1.27461	5.05779	3.96811	-1.05984	1.72184
NFKBIA	14	35401513	35404750	-	564.259	77.1914	62.0925	62.6955	0.00292937	0.016044	1.27451	0.349939	1.27451	72.3195	56.7431	1.10227	1.47366
AC025423.2	12	68841946	68842385	+	61.4093	8.79373	6.72796	6.82325	0.0545103	0.147587	1.27418	0.349568	1.27418	7.99543	6.27496	-1.01629	1.64997
ZNF691	1	42846573	42852478	+	45.6905	6.81502	4.95805	5.07672	0.116757	0.256512	1.27394	0.349301	1.27394	5.22786	4.10368	-1.07863	1.75053
PDE4D	5	58969038	60522121	-	1333.31	166.826	147.107	148.145	1.3772e-05	0.000211602	1.27393	0.349281	1.27393	159.225	124.988	1.17479	1.38143
TGS1	8	55773446	55826446	+	300.603	40.9551	33.1853	33.4004	0.000660041	0.00488519	1.27392	0.349275	1.27392	36.6555	28.7738	1.13153	1.43423
AKNA	9	114334156	114394406	-	90.8674	12.353	9.94438	10.0964	0.0301417	0.0960491	1.27377	0.349108	1.27377	10.4023	8.16653	1.03371	1.56959
AC146944.3	5	70449636	70450354	+	13.7085	2.38122	1.44748	1.52317	0.37461	0.56376	1.2737	0.349025	1.2737	1.5842	1.24378	-1.41095	2.289
JKAMP	14	59484443	59505411	+	521.07	69.4457	57.4489	57.8967	0.000488364	0.00385063	1.27366	0.348984	1.27366	66.9337	52.5521	1.13239	1.43256
CDIPT	16	29858357	29863415	-	833.964	117.838	91.5698	92.6627	3.58022e-05	0.000461286	1.27363	0.348943	1.27363	111.832	87.8059	1.16562	1.39164
IQCK	16	19716456	19858468	+	60.6706	9.28756	6.66316	6.74118	0.0649355	0.167962	1.27334	0.348612	1.27334	7.84093	6.15779	-1.00431	1.62837
MSL3	X	11758159	11775773	+	235.298	31.3142	25.9764	26.1442	0.00155211	0.00969407	1.27316	0.348416	1.27316	29.4291	23.115	1.11473	1.45412
AP001160.3	11	62786023	62786786	-	10.6354	2.00554	1.11734	1.18171	0.521089	0.693016	1.27289	0.348106	1.27289	1.42314	1.11804	-1.47619	2.3918
RPF1	1	84479259	84498353	+	155.147	21.1009	17.0876	17.2386	0.0121691	0.048656	1.27249	0.347658	1.27249	19.1834	15.0755	1.06439	1.52129
CARHSP1	16	8852942	8869013	-	575.051	75.295	63.54	63.8945	2.7262e-05	0.000370176	1.2723	0.347441	1.2723	73.1141	57.466	1.16766	1.38632
GRIPAP1	X	48973720	49002265	-	425.687	56.0863	46.977	47.2985	0.000667157	0.00492517	1.27209	0.347206	1.27209	53.6352	42.1629	1.12803	1.43455
RPL9	4	39452521	39458950	-	156.8	21.5004	17.3196	17.4222	0.00251703	0.0142361	1.27201	0.347107	1.27201	19.8399	15.5973	1.10548	1.46362
AL391056.1	9	129575117	129584557	+	14.5368	2.52965	1.5486	1.6152	0.287777	0.474378	1.27194	0.347026	1.27194	1.95691	1.53853	-1.32444	2.1427
AL161665.1	14	32149176	32158009	-	96.8182	14.3702	10.5194	10.7576	0.0778558	0.192343	1.27157	0.346614	1.27157	11.3065	8.89178	-1.04251	1.68564
ACTR6	12	100199122	100241866	+	85.4605	11.8936	9.39962	9.49561	0.0341506	0.10519	1.27153	0.346566	1.27153	10.6055	8.34073	1.01826	1.58779
GNPDA1	5	141991749	142013042	-	422.282	55.8234	46.5736	46.9203	0.000131067	0.00133978	1.27152	0.346556	1.27152	54.8394	43.1289	1.15041	1.40539
AC079944.2	3	113885298	113886032	+	38.6947	5.08604	4.24323	4.29942	0.101316	0.231981	1.27094	0.345894	1.27094	4.95023	3.89494	-1.06149	1.71461
RBMXL1	1	88979456	88992961	-	181.433	26.6123	19.9323	20.1592	0.0171752	0.0629596	1.27015	0.345003	1.27015	22.9382	18.0594	1.04616	1.54211
KLF6	10	3775996	3785282	-	525.36	77.1025	57.8534	58.3733	0.00403492	0.0205844	1.27013	0.344972	1.27013	65.5038	51.5727	1.0951	1.47312
BTF3P2	14	28673241	28673728	-	11.2218	1.84525	1.21043	1.24687	0.343805	0.534072	1.27012	0.344963	1.27012	1.30731	1.02928	-1.34104	2.16336
HNRNPA1P10	19	11666069	11667031	-	60.7285	9.523	6.59014	6.74761	0.151358	0.306255	1.26986	0.344666	1.26986	7.19399	5.66519	-1.08676	1.75244
AC027309.2	5	172656522	172656714	-	14.4948	2.19226	1.52588	1.61053	0.471495	0.652239	1.26882	0.343489	1.26882	1.76965	1.39472	-1.43893	2.31654
AC245100.8	1	148458814	148459872	+	9.91793	1.45242	1.0237	1.10199	0.321271	0.510155	1.26876	0.343417	1.26876	1.07728	0.849083	-1.56155	2.51369
SNHG30	17	35568076	35574901	+	34.274	5.02873	3.709	3.80822	0.182407	0.348417	1.26847	0.343088	1.26847	3.93145	3.09937	-1.12938	1.81718
ZFAND2A	7	1152071	1160760	-	114.348	14.9128	12.5822	12.7053	0.0188922	0.0675641	1.26757	0.342066	1.26757	13.9002	10.966	1.03921	1.54611
GEM	8	94249253	94262351	-	44.1338	6.22134	4.86706	4.90375	0.0645605	0.167263	1.26743	0.341903	1.26743	5.6305	4.44246	-1.01269	1.62676
CCT8P1	1	147203276	147204933	-	102.527	13.5832	11.2007	11.3919	0.0294249	0.0943358	1.26741	0.341879	1.26741	11.7024	9.23335	1.01797	1.57796
ZNF224	19	44094339	44109887	+	75.9494	10.4949	8.30663	8.43882	0.0709367	0.179303	1.2668	0.34119	1.2668	9.52821	7.52147	-1.03542	1.66162
RRM2B	8	102204502	102238962	-	483.29	66.8151	52.8055	53.6989	0.00104981	0.00705733	1.26677	0.341157	1.26677	65.7189	51.8791	1.11634	1.43747
ASPM	1	197084127	197146695	-	1270.03	168.241	139.773	141.115	0.000461497	0.00367917	1.26676	0.341141	1.26676	149.478	118	1.13011	1.41993
AEBP2	12	19404045	19720802	+	235.559	31.7468	26.0097	26.1733	0.00200994	0.0119366	1.26643	0.340768	1.26643	29.4195	23.2303	1.10821	1.44724
RBM48	7	92528773	92540482	+	43.5078	5.82735	4.78594	4.83421	0.0785275	0.19347	1.26637	0.340696	1.26637	5.22678	4.12738	-1.03215	1.65525
WASHC2A	10	50067888	50133510	+	194.766	27.4083	21.4507	21.6407	0.00376286	0.0194801	1.26603	0.340307	1.26603	25.2952	19.98	1.09371	1.46549
KYNU	2	142877657	143055834	+	1391.06	181.716	153.608	154.562	5.69409e-05	0.000679413	1.26589	0.340149	1.26589	176.772	139.643	1.15608	1.38612
MDN1	6	89642498	89819795	-	443.346	60.0083	48.9296	49.2607	0.00104606	0.00703544	1.26556	0.33978	1.26556	55.2832	43.6826	1.118	1.4326
GPR39	2	132416805	132646583	+	291.278	41.5321	31.997	32.3642	0.00532884	0.0256979	1.26539	0.339579	1.26539	38.1561	30.1537	1.08521	1.47548
PMF1-BGLAP	1	156212982	156243333	+	21.6326	3.57481	2.2785	2.40363	0.36057	0.55096	1.26491	0.339035	1.26491	2.28069	1.80305	-1.26802	2.02882
HINFP	11	119121580	119136060	+	72.802	9.85662	7.96818	8.08911	0.0917315	0.215894	1.26458	0.338656	1.26458	8.92128	7.05475	-1.03846	1.66066
ZNF620	3	40477131	40518737	+	44.6673	6.54221	4.9069	4.96303	0.0964406	0.224294	1.2644	0.338455	1.2644	5.45823	4.31685	-1.04675	1.67345
ZBTB20	3	114314501	115147272	-	456.538	61.626	50.2506	50.7265	0.00555537	0.0265056	1.26436	0.338407	1.26436	55.5508	43.9359	1.0824	1.47691
ST13P3	12	106015897	106017007	+	31.5341	4.27061	3.43168	3.50379	0.13739	0.286591	1.26417	0.338195	1.26417	4.05565	3.20814	-1.13554	1.81475
BNIP3P1	14	28264390	28265975	+	94.0153	13.1661	10.3313	10.4461	0.0358916	0.109056	1.26378	0.337742	1.26378	11.9973	9.49318	1.01358	1.57574
SLC25A30	13	45393316	45418456	-	109.473	15.8479	12.0447	12.1637	0.0282838	0.0914735	1.26373	0.337685	1.26373	13.8468	10.9571	1.03071	1.54943
RBMS1P1	12	66234079	66235235	-	61.4419	9.47619	6.60785	6.82688	0.121493	0.26385	1.26363	0.337573	1.26363	8.37114	6.62468	-1.1018	1.75931
PRKACB	1	84078062	84238499	+	324.702	44.4636	35.6631	36.078	0.00391516	0.0201379	1.26341	0.337328	1.26341	42.6913	33.7904	1.09062	1.46358
ADPGK	15	72751369	72785847	-	862.709	110.001	95.3089	95.8566	4.07412e-05	0.000514765	1.26336	0.337266	1.26336	104.371	82.6136	1.15873	1.37744
SPRY4	5	142310427	142326456	-	125.368	17.9686	13.8249	13.9298	0.0136844	0.05319	1.26335	0.337251	1.26335	15.7032	12.4298	1.05829	1.50814
ZNF107	7	64666083	64711583	+	88.7771	11.9305	9.77082	9.86412	0.0336597	0.10408	1.26314	0.337011	1.26314	10.6552	8.43554	1.02594	1.55517
NASP	1	45583846	45618905	+	844.845	111.291	93.1944	93.8716	0.000897349	0.0062307	1.26312	0.336995	1.26312	102.956	81.509	1.12047	1.42393
ITM2B	13	48232612	48270358	+	955.688	126.303	105.504	106.188	0.000431738	0.00349822	1.26301	0.336863	1.26301	118.928	94.1626	1.13052	1.41102
MTHFD2L	4	74114174	74303100	+	43.1748	6.35519	4.71349	4.7972	0.152171	0.30712	1.26291	0.336756	1.26291	5.16361	4.08865	-1.08744	1.73441
SFT2D1	6	166319728	166342577	-	117.109	16.7383	12.9095	13.0121	0.0148312	0.0563963	1.26252	0.336302	1.26252	14.9194	11.8172	1.05681	1.50826
ZC3H3	8	143437659	143541448	-	741.304	95.7741	81.9393	82.3672	2.66923e-05	0.00036347	1.26232	0.336081	1.26232	93.6625	74.1985	1.1618	1.37154
NSRP1P1	1	77847110	77848803	+	10.6683	1.85991	1.11452	1.18537	0.515731	0.689081	1.26222	0.335968	1.26222	1.15543	0.91539	-1.46993	2.34191
TMCC1	3	129647792	129893607	-	330.997	43.5088	36.4656	36.7775	0.00182673	0.0110543	1.26212	0.335848	1.26212	39.3215	31.1551	1.10544	1.441
AC007182.2	14	75595805	75596207	-	23.5611	3.78145	2.55616	2.6179	0.282467	0.467934	1.26194	0.335647	1.26194	2.76388	2.19018	-1.18444	1.88623
DDX21	10	68956170	68985069	+	3150.19	419.452	347.847	350.021	0.000201111	0.00191034	1.26191	0.335612	1.26191	389.947	309.013	1.14019	1.39663
AL356653.1	1	44122153	44122513	-	14.2259	2.22835	1.51711	1.58066	0.391859	0.580175	1.2618	0.335485	1.2618	1.73826	1.3776	-1.38984	2.21283
TSPAN17	5	176647387	176659055	+	1102.95	147.206	121.525	122.55	1.03195e-05	0.000166948	1.26114	0.33473	1.26114	144.811	114.826	1.16899	1.36055
ASTE1	3	131013875	131027650	-	26.3016	4.41257	2.82555	2.9224	0.326233	0.515445	1.26087	0.334422	1.26087	3.20494	2.54184	-1.24166	1.97399
GDI2P2	1	72274552	72275160	+	23.7002	3.75183	2.56807	2.63335	0.302455	0.490299	1.2608	0.334344	1.2608	2.91759	2.31407	-1.21028	1.9239
SAP30	4	173369969	173377533	+	84.7921	11.6971	9.28791	9.42135	0.0409863	0.120263	1.2606	0.334111	1.2606	9.79679	7.77152	1.00798	1.57653
CCDC34	11	27330827	27363235	-	242.28	33.0118	26.626	26.92	0.00146202	0.00925256	1.26054	0.334047	1.26054	27.7946	22.0497	1.10987	1.43167
PTRH2	17	59674636	59707627	-	286.451	37.2157	31.6169	31.8279	0.00147797	0.00932069	1.26051	0.334003	1.26051	36.2669	28.7717	1.10838	1.43351
VASH1-AS1	14	76781733	76786725	-	15.9345	2.58108	1.61131	1.7705	0.27225	0.45611	1.2602	0.33365	1.2602	2.13407	1.69344	-1.62253	2.57674
PLS3	X	115561174	115650862	+	2752.12	364.868	304.042	305.792	1.25231e-05	0.000195339	1.25993	0.333346	1.25993	350.298	278.029	1.16665	1.36067
FKBP4P2	9	39631046	39632417	+	12.7264	2.12291	1.32696	1.41404	0.519958	0.69241	1.25992	0.333333	1.25992	1.60401	1.2731	-1.53085	2.43007
AL356652.1	20	35174355	35174920	-	18.6599	2.75203	2.03533	2.07333	0.225701	0.402685	1.25976	0.333152	1.25976	2.24527	1.7823	-1.20538	1.91295
GALNT18	11	11270877	11622006	-	350.066	48.6721	38.5439	38.8963	0.00138477	0.00888504	1.25973	0.333117	1.25973	45.6012	36.1992	1.11027	1.42931
SLAIN1	13	77697687	77764243	+	25.3925	3.47238	2.78802	2.82139	0.187683	0.355097	1.25909	0.332386	1.25909	3.14536	2.49811	-1.12343	1.78099
PPIF	10	79347469	79355335	+	1198.12	176.819	131.502	133.125	0.0149433	0.0567173	1.2588	0.33205	1.2588	150.857	119.842	1.05159	1.50684
TCTEX1D2	3	196291219	196318300	-	23.2424	3.44384	2.42873	2.58249	0.195733	0.36552	1.25844	0.33164	1.25844	2.7644	2.19668	-1.41654	2.24335
PROS1	3	93873051	93980004	-	368.771	55.6253	40.1333	40.9745	0.036891	0.111176	1.25827	0.331445	1.25827	49.2801	39.1649	1.01595	1.5584
NRP2	2	205681990	205798134	+	1197.14	184.899	128.696	133.016	0.000355726	0.0030061	1.25826	0.33143	1.25826	170.915	135.834	1.1318	1.39885
AL117209.1	14	102933574	102937178	+	22.0996	3.02409	2.42894	2.45551	0.179933	0.345392	1.25819	0.331347	1.25819	2.70864	2.15281	-1.13884	1.80282
ELOVL7	5	60751791	60844275	-	249.241	32.6616	27.4063	27.6934	0.00510177	0.0248532	1.25791	0.331031	1.25791	32.4169	25.7704	1.07802	1.46782
CDK20	9	87966441	87974754	-	52.2246	7.30079	5.6836	5.80273	0.13076	0.277515	1.25758	0.330645	1.25758	6.48311	5.15524	-1.10874	1.75347
SFXN1	5	175477062	175529743	+	1245.31	160.17	137.7	138.368	2.10357e-05	0.000301295	1.25752	0.330585	1.25752	154.933	123.205	1.1615	1.36149
N4BP2L2	13	32432417	32538886	-	160.064	21.5915	17.6904	17.7849	0.00378032	0.0195568	1.25737	0.33041	1.25737	19.8267	15.7684	1.0916	1.44832
FBXO36	2	229922302	230013120	+	27.0446	4.34585	2.9267	3.00495	0.301704	0.489533	1.25736	0.330397	1.25736	3.2723	2.60252	-1.20006	1.89724
NUMBL	19	40665905	40690973	-	762.179	97.3442	84.2416	84.6865	3.48303e-05	0.000452416	1.25735	0.330387	1.25735	96.4804	76.7331	1.15634	1.36719
WDR45	X	49074433	49101171	-	253.325	37.3017	27.878	28.1472	0.0045579	0.0226649	1.2573	0.330331	1.2573	32.9427	26.2011	1.08849	1.4523
LCN2	9	128149071	128153454	+	29.1921	5.07497	3.12391	3.24356	0.286158	0.472468	1.25714	0.330143	1.25714	3.93063	3.12665	-1.21399	1.91859
AC074143.1	16	67163385	67165816	+	35.3969	5.37395	3.85707	3.93299	0.202851	0.374885	1.25712	0.330121	1.25712	4.52996	3.60344	-1.12746	1.78178
HOMEZ	14	23272422	23299448	-	89.601	12.4734	9.85295	9.95566	0.0337159	0.104164	1.257	0.329986	1.257	11.532	9.17423	1.01774	1.55252
ACBD5	10	27195214	27242131	-	504.706	67.513	55.6704	56.0784	0.0021819	0.0127679	1.25689	0.329862	1.25689	61.6594	49.057	1.10159	1.4341
GFPT2	5	180300698	180353337	-	214.609	34.0182	23.0259	23.8454	0.0248967	0.0830238	1.25578	0.328581	1.25578	30.3998	24.208	1.03224	1.52772
EPOP	17	38671703	38674958	-	282.66	40.6881	31.1306	31.4066	0.00444717	0.0222297	1.25564	0.328428	1.25564	36.3205	28.9258	1.08569	1.45221
SHC2	19	416583	460997	-	28.5589	5.14954	2.91477	3.17322	0.216087	0.390921	1.25558	0.328348	1.25558	4.20437	3.34856	-1.27352	2.00766
NUBP1	16	10743786	10769352	+	178.022	27.7783	19.5773	19.7802	0.0321412	0.100466	1.25524	0.327958	1.25524	22.2426	17.7199	1.03658	1.52002
PSMF1	20	1113240	1189416	+	2466.03	313.402	272.692	274.004	4.16616e-06	7.61179e-05	1.25517	0.327881	1.25517	310.37	247.274	1.17206	1.34417
WDR75	2	189441446	189475553	+	446.566	58.2277	49.2247	49.6184	0.00271094	0.0150951	1.25462	0.327255	1.25462	53.7465	42.8388	1.09424	1.43852
KIF5C	2	148875227	149026760	+	20.7239	2.9758	2.23849	2.30266	0.231714	0.409801	1.25444	0.327043	1.25444	2.25368	1.79657	-1.17845	1.85443
CENPH	5	69189574	69210358	+	149.977	18.6912	16.4675	16.6641	0.027034	0.0884447	1.25427	0.326853	1.25427	18.2324	14.5362	1.01263	1.55359
POLD3	11	74493851	74669118	+	259.935	34.2722	28.6429	28.8817	0.00300939	0.0163699	1.2536	0.326071	1.2536	30.6526	24.4517	1.09489	1.43531
CCDC28B	1	32200386	32205388	+	9.50845	1.58094	1.00886	1.05649	0.391934	0.580227	1.25306	0.325452	1.25306	1.09168	0.871211	-1.48743	2.3355
CCDC58	3	122359591	122383232	-	89.3906	11.9509	9.82237	9.93229	0.0370602	0.111639	1.25297	0.325349	1.25297	10.4727	8.3583	1.01549	1.54598
AL365217.1	6	65302522	65304958	+	19.2985	3.06333	2.10351	2.14428	0.24957	0.429792	1.25269	0.325029	1.25269	2.58618	2.0645	-1.17271	1.84025
CRBN	3	3144628	3179728	-	111.959	14.431	12.3587	12.4399	0.0144735	0.0553585	1.25249	0.324802	1.25249	13.5934	10.8531	1.05256	1.4904
GSR	8	30678066	30727847	-	4109.47	520.476	453.656	456.608	0.000120726	0.00126226	1.25237	0.324666	1.25237	491.832	392.719	1.14094	1.37469
RNF138	18	32091874	32131562	+	113.584	15.937	12.5261	12.6204	0.0220551	0.0759088	1.25216	0.324421	1.25216	13.8751	11.0809	1.04077	1.50649
TMED2-DT	12	123575891	123585116	-	13.1361	2.52264	1.38571	1.45956	0.540813	0.709203	1.25215	0.324402	1.25215	1.4291	1.14133	-1.39422	2.18595
TMX1	14	51240162	51257656	+	732.64	95.2649	80.9483	81.4045	0.000341535	0.00290842	1.25197	0.324202	1.25197	90.8825	72.5915	1.12808	1.38948
CHMP5	9	33264879	33282071	+	268.413	35.8499	29.665	29.8237	0.00138893	0.00890379	1.25178	0.323986	1.25178	33.193	26.5166	1.10822	1.41395
AC107959.1	8	22984596	23019336	-	32.1056	4.96065	3.48399	3.56728	0.245915	0.425522	1.25175	0.323943	1.25175	4.19542	3.35165	-1.15704	1.81293
VGF	7	101162509	101165570	-	93.0554	14.5124	10.1652	10.3395	0.0901525	0.213774	1.25168	0.323866	1.25168	11.7741	9.40662	-1.04421	1.63597
UGT1A7	2	233681938	233773300	+	164.591	25.3917	17.7368	18.2878	0.0874399	0.209036	1.25151	0.323667	1.25151	22.1889	17.7297	-1.06155	1.66268
CSRNP2	12	51061205	51083665	-	169.74	23.8787	18.639	18.86	0.00801839	0.0352377	1.2515	0.323656	1.2515	22.4365	17.9277	1.06994	1.46387
CPEB3	10	92046692	92291079	-	13.213	2.04785	1.44523	1.46811	0.369368	0.559269	1.2503	0.322274	1.2503	1.60249	1.28169	-1.27072	1.98645
RPL32P3	3	129382922	129399656	-	51.0487	6.71649	5.57515	5.67208	0.126339	0.271056	1.25028	0.322255	1.25028	6.21446	4.97045	-1.0917	1.70656
RPL13AP25	13	54440704	54441316	-	33.2965	4.61031	3.64596	3.69961	0.141814	0.292464	1.24998	0.321908	1.24998	4.29579	3.43668	-1.10249	1.7226
WASHC2C	10	45727200	45792962	+	359.625	47.1659	39.6555	39.9583	0.000378392	0.00315409	1.24981	0.32171	1.24981	46.7254	37.3859	1.12621	1.38698
TCAIM	3	44338119	44409452	+	118.669	15.3702	13.1039	13.1854	0.0103736	0.0429844	1.2498	0.321697	1.2498	15.0436	12.0368	1.06184	1.47103
AL445487.1	9	107169569	107171149	-	14.7562	2.09352	1.5836	1.63957	0.386452	0.574801	1.24962	0.321487	1.24962	1.89975	1.52026	-1.35472	2.11546
LARGE1	22	33162226	33922842	-	116.003	15.9624	12.7163	12.8892	0.0462365	0.130703	1.24844	0.320128	1.24844	15.0195	12.0306	1.00164	1.55606
FP671120.4	21	8256781	8256934	+	162.736	32.2956	16.6432	18.0818	0.265849	0.448691	1.24814	0.319778	1.24814	23.0847	18.4953	-1.29527	2.01783
RNA5-8SN3	21	8395607	8395760	+	162.736	32.2956	16.6432	18.0818	0.265849	0.448691	1.24814	0.319778	1.24814	23.0847	18.4953	-1.29527	2.01783
TRIM26	6	30184455	30213428	-	845.536	103.537	93.472	93.9485	4.62952e-05	0.000570881	1.24808	0.319715	1.24808	101.829	81.5885	1.14808	1.3568
SOS1	2	38981549	39124346	-	606.259	75.1888	67.0192	67.3621	0.000263333	0.00237363	1.24797	0.319586	1.24797	74.3709	59.5934	1.12959	1.37877
KLF10	8	102648784	102655726	-	1035.24	145.582	113.969	115.027	0.00125602	0.00818186	1.24768	0.319252	1.24768	134.307	107.645	1.10905	1.40364
EED	11	86244753	86278814	+	157.39	21.1899	17.3253	17.4877	0.0171554	0.0629193	1.24701	0.318475	1.24701	18.7004	14.9961	1.04374	1.48987
DENND2D	1	111185969	111204536	-	28.8209	4.04955	3.1619	3.20233	0.161672	0.320488	1.247	0.318466	1.247	3.44847	2.7654	-1.11771	1.73806
ZC4H2	X	64915802	65034714	-	21.1024	2.8975	2.27947	2.34471	0.232496	0.410724	1.24666	0.318068	1.24666	2.76562	2.21842	-1.23642	1.9216
LRRCC1	8	85107215	85146081	+	79.0259	11.1505	8.65864	8.78066	0.0600324	0.15868	1.24646	0.31784	1.24646	9.10907	7.30794	-1.01206	1.57241
KCTD12	13	76880175	76886406	-	251.621	34.8119	27.748	27.9579	0.0054029	0.0259159	1.24606	0.317373	1.24606	31.9214	25.6179	1.07717	1.44143
PEX12	17	35574795	35578864	-	46.2453	6.05433	5.08505	5.13836	0.0938971	0.219812	1.24604	0.317348	1.24604	5.83218	4.68057	-1.05361	1.63585
BMS1P22	22	15805263	15820885	-	9.94253	1.73995	1.063	1.10473	0.333519	0.523415	1.24598	0.317282	1.24598	1.06426	0.854152	-1.38981	2.15763
UBE2D3	4	102794383	102868897	-	1273.32	161.007	140.876	141.48	1.24696e-05	0.000195139	1.24558	0.316816	1.24558	158.286	127.078	1.15796	1.33983
RBM4	11	66638667	66668375	+	896.735	116.53	99.0649	99.6372	0.000113267	0.0012	1.24519	0.316361	1.24519	113.923	91.4907	1.13779	1.36272
LINC01193	15	20940380	21058441	+	16.244	2.49302	1.76183	1.80488	0.313298	0.502039	1.24515	0.316325	1.24515	1.96577	1.57874	-1.27837	1.982
MRPL1	4	77862830	77952786	+	119.267	15.7589	13.1532	13.2518	0.0246688	0.0825125	1.24502	0.316164	1.24502	14.5952	11.7229	1.03381	1.49937
MFSD14B	9	94374569	94461043	+	474.456	64.3021	52.4194	52.7173	0.000969509	0.00663783	1.24459	0.315672	1.24459	59.2875	47.6361	1.11196	1.39305
SLC43A2	17	1569268	1628887	-	150.081	23.2894	16.2899	16.6756	0.0233039	0.0790143	1.24454	0.315608	1.24454	20.633	16.5789	1.03164	1.50137
AC023509.1	12	53441741	53467529	+	150.564	20.9	16.3933	16.7293	0.0535935	0.145791	1.24451	0.31558	1.24451	17.4785	14.0445	-1.03658	1.60546
TOP1MT	8	143304384	143359980	-	408.291	55.2005	45.1168	45.3656	0.00111675	0.00743428	1.24408	0.31508	1.24408	50.7056	40.7575	1.10868	1.39601
FOXK1	7	4682295	4771443	+	1483.6	193.205	164.058	164.845	2.47966e-05	0.000344515	1.24387	0.314833	1.24387	186.441	149.888	1.15146	1.34369
FAM86C2P	11	67791648	67805337	-	145.751	19.2128	16.1057	16.1946	0.00870572	0.0375687	1.24374	0.314687	1.24374	17.8302	14.336	1.06723	1.44945
SNRNP35	12	123458088	123473155	+	93.0891	11.6635	10.286	10.3432	0.0207868	0.0724815	1.24358	0.314502	1.24358	11.2974	9.08454	1.03917	1.4882
ANXA7	10	73375101	73414077	-	888.723	114.853	98.104	98.7471	0.000292828	0.00258242	1.24318	0.314041	1.24318	113.404	91.2205	1.12574	1.37288
MTFR2	6	136231024	136250336	-	59.2074	8.96419	6.39106	6.5786	0.0589374	0.15677	1.24314	0.313988	1.24314	6.1449	4.94305	-1.00565	1.55413
LY6E-DT	8	142981738	143018438	-	10.2614	1.96783	1.08209	1.14015	0.465903	0.647683	1.24309	0.313927	1.24309	1.12946	0.90859	-1.48956	2.30177
TRAF2	9	136881912	136926608	+	364.482	47.4546	40.2153	40.498	0.00164985	0.0101681	1.24303	0.313866	1.24303	46.5174	37.4225	1.10058	1.40393
LARP7	4	112637107	112657593	+	222.844	28.656	24.6208	24.7604	0.00378625	0.01958	1.243	0.313826	1.243	27.1938	21.8776	1.08503	1.42396
FNBP4	11	47716494	47767444	-	464.378	60.4533	51.3463	51.5976	0.000302723	0.00265017	1.24296	0.313774	1.24296	58.0911	46.7363	1.12575	1.37236
HIRA	22	19330698	19447451	-	440.383	57.559	48.5979	48.9315	0.000576673	0.00438565	1.24267	0.313446	1.24267	51.8305	41.7089	1.11747	1.38191
CDC7	1	91500851	91525765	+	99.3494	15.4139	10.8977	11.0388	0.0481644	0.134879	1.24262	0.313387	1.24262	11.5134	9.26542	1.00255	1.54017
APH1A	1	150265399	150269581	-	1249.99	158.384	138.308	138.887	1.0702e-05	0.000171974	1.24261	0.313369	1.24261	155.745	125.337	1.15729	1.33421
F2RL2	5	76615482	76623414	-	172.658	24.0744	19.0744	19.1842	0.0082808	0.0360753	1.24214	0.312832	1.24214	21.3712	17.2051	1.07072	1.44102
AC073136.1	7	56288230	56291426	+	52.1202	7.56003	5.68353	5.79113	0.142775	0.29385	1.24179	0.31242	1.24179	6.3011	5.07421	-1.10819	1.70887
MAP3K13	3	185282941	185489095	+	107.879	13.869	11.9201	11.9866	0.0137372	0.0533664	1.24114	0.311664	1.24114	13.6229	10.9761	1.05236	1.46378
RNF115	1	145738868	145824096	-	397.531	50.0445	43.9822	44.1701	0.000231613	0.00213812	1.2409	0.311386	1.2409	49.3741	39.7889	1.12797	1.36514
FNIP1	5	131641714	131797064	-	222.932	30.6981	24.6265	24.7702	0.00345033	0.0182204	1.2407	0.311157	1.2407	28.0965	22.6457	1.08748	1.41552
ZNF276	16	89720400	89740926	+	321.369	43.5036	35.3619	35.7076	0.0198626	0.0701441	1.24069	0.31114	1.24069	39.1489	31.5542	1.0405	1.47939
STAG3L1	7	75359194	75395384	+	48.5649	7.57289	5.24371	5.3961	0.152591	0.307709	1.24067	0.311124	1.24067	5.41365	4.36348	-1.12325	1.72899
SLC25A25	9	128068201	128109246	+	126.668	17.2052	13.9999	14.0742	0.0119178	0.0478912	1.24055	0.310976	1.24055	15.7067	12.6611	1.0579	1.45473
AC000089.1	22	19792294	19793095	+	11.5495	1.92036	1.26155	1.28328	0.399609	0.587052	1.2405	0.310919	1.2405	1.48925	1.20053	-1.3101	2.01602
AC105105.1	18	58535415	58538553	+	48.3113	7.83013	4.83611	5.36793	0.578304	0.736256	1.24042	0.310832	1.24042	6.4035	5.16235	-1.6176	2.48892
UEVLD	11	18529609	18588748	-	299.567	39.7062	33.0471	33.2853	0.00642436	0.0297238	1.23971	0.309998	1.23971	37.4858	30.2376	1.072	1.43365
FBL	19	39834458	39846380	-	2180.29	279.74	240.976	242.255	0.000201194	0.00191034	1.2397	0.309988	1.2397	264.53	213.383	1.12886	1.36142
VRK2	2	57907629	58159921	+	331.1	46.6557	36.5477	36.7889	0.0053007	0.0255966	1.23961	0.309881	1.23961	41.0741	33.1348	1.08012	1.42265
ANO6	12	45215987	45440405	+	1465.93	216.23	159.928	162.881	0.00537457	0.0258317	1.23959	0.309864	1.23959	198.065	159.783	1.07815	1.4252
NR4A2	2	156324437	156342349	-	23.3556	3.82623	2.44126	2.59507	0.241549	0.420617	1.23924	0.309458	1.23924	2.29697	1.85353	-1.23232	1.89251
GCA	2	162318840	162371596	+	62.9968	8.49406	6.87766	6.99964	0.105426	0.238337	1.23893	0.30909	1.23893	7.29983	5.89207	-1.07119	1.64421
ARHGAP17	16	24919389	25015667	-	535.966	72.3678	59.1577	59.5518	0.000330466	0.00284303	1.23882	0.308961	1.23882	68.8191	55.5524	1.12293	1.36666
SSB	2	169791933	169812065	+	785.985	97.2216	86.9383	87.3317	0.000129337	0.00133003	1.23867	0.308796	1.23867	97.1159	78.4032	1.13234	1.35499
ZNRF2	7	30284597	30367690	+	180.134	24.7021	19.7424	20.0148	0.0645549	0.167263	1.23851	0.30861	1.23851	22.3712	18.063	-1.01288	1.55367
AP5Z1	7	4775615	4794398	+	365.092	48.2558	40.2052	40.5658	0.0033469	0.0177966	1.23847	0.308565	1.23847	47.1413	38.064	1.08342	1.41572
SERBP1P6	5	42465400	42468869	-	82.4286	11.9216	9.06582	9.15873	0.0680337	0.174189	1.2384	0.308475	1.2384	10.3084	8.32396	-1.01656	1.55903
MAT1A	10	80271820	80289659	-	22.1795	3.27964	2.42331	2.46439	0.207872	0.38107	1.23815	0.308182	1.23815	2.53039	2.04369	-1.1679	1.7904
LGALS8	1	236518000	236552982	+	355.557	45.9116	39.2876	39.5063	0.000338684	0.00289616	1.23805	0.308074	1.23805	45.3638	36.6412	1.122	1.36611
LUCAT1	5	91054834	91314548	-	134.412	17.6286	14.8354	14.9347	0.0166345	0.0615746	1.23798	0.307986	1.23798	16.3857	13.2358	1.04123	1.4719
NOL10	2	10570754	10689988	-	542.331	76.4789	59.8803	60.259	0.00142689	0.00907424	1.23785	0.307834	1.23785	68.471	55.3146	1.10381	1.38816
RND1	12	48857145	48865871	-	209.94	30.0999	22.9442	23.3267	0.0905571	0.214182	1.23781	0.307788	1.23781	25.663	20.7326	-1.03711	1.58903
THTPA	14	23555988	23560272	+	157.345	23.1411	17.2932	17.4828	0.0326911	0.101833	1.23763	0.307582	1.23763	20.233	16.3481	1.02562	1.49347
MYL12BP1	15	42571927	42572434	+	51.3024	6.62926	5.63	5.70027	0.101099	0.23175	1.23739	0.3073	1.23739	6.27033	5.06738	-1.07044	1.63899
C1orf53	1	197902630	197907368	+	41.4583	5.84423	4.56036	4.60648	0.136595	0.28542	1.23739	0.307298	1.23739	5.04669	4.0785	-1.0738	1.64413
CKAP4	12	106237881	106304280	-	1831.37	244.494	201.799	203.485	2.65535e-05	0.000362613	1.2372	0.307077	1.2372	239.188	193.33	1.14669	1.33485
STX18	4	4415742	4542347	-	181.253	25.2956	19.9987	20.1392	0.0145991	0.0556905	1.23708	0.306938	1.23708	21.9661	17.7565	1.05304	1.45329
C1GALT1C1	X	120625674	120630055	-	158.595	20.7681	17.4894	17.6216	0.0181621	0.0654306	1.23703	0.306881	1.23703	19.6922	15.9189	1.03994	1.47148
EPG5	18	45847609	45967330	-	193.506	25.6445	21.3126	21.5006	0.00896838	0.0384367	1.23676	0.30657	1.23676	24.9171	20.1471	1.06028	1.44262
SLC16A3	17	82228397	82261130	+	217.473	31.7859	23.7659	24.1637	0.012117	0.0484883	1.23663	0.30641	1.23663	29.2468	23.6505	1.0564	1.4476
HORMAD1	1	150698060	150720896	-	28.1798	4.24708	3.06942	3.13109	0.235163	0.413811	1.23647	0.306229	1.23647	3.27487	2.64856	-1.16617	1.78291
FAM210A	18	13663347	13726664	-	150.611	19.4872	16.6434	16.7346	0.00802984	0.0352773	1.23643	0.306175	1.23643	18.9235	15.305	1.0665	1.43343
CCDC9	19	47255980	47273702	+	305.162	38.1178	33.7438	33.9069	0.00140044	0.00895758	1.23572	0.305356	1.23572	37.796	30.5861	1.1002	1.38794
NSA2P7	9	96407284	96407798	+	22.682	3.29431	2.48805	2.52022	0.212632	0.38706	1.23568	0.3053	1.23568	2.88674	2.33616	-1.16301	1.77579
NEDD9	6	11183298	11382349	-	1294.48	162.177	142.945	143.831	2.76962e-05	0.000375009	1.23543	0.305009	1.23543	151.479	122.612	1.14561	1.33228
MIIP	1	12019466	12032046	+	129.426	17.1836	14.2876	14.3807	0.0209763	0.0729828	1.23543	0.305008	1.23543	15.6419	12.6611	1.04039	1.46702
MYC	8	127735434	127742952	+	1858.51	253.653	204.763	206.501	0.00712837	0.0322946	1.23508	0.304608	1.23508	229.822	186.078	1.06654	1.43027
ISCA1P1	5	62776877	62777264	-	22.4514	3.18317	2.45472	2.4946	0.208855	0.382218	1.23476	0.304233	1.23476	2.63381	2.13305	-1.18462	1.80612
PALB2	16	23603160	23641311	-	173.414	22.5063	19.1348	19.2682	0.0119915	0.0481068	1.23459	0.304031	1.23459	20.6706	16.7429	1.05615	1.44317
SMN1	5	70925030	70953943	+	244.715	32.4786	26.9732	27.1906	0.00719784	0.0325171	1.23458	0.304025	1.23458	28.687	23.2362	1.07091	1.42327
CYP4F11	19	15912367	15934868	-	843.038	109.381	93.2675	93.6709	3.86645e-05	0.000492424	1.23446	0.303875	1.23446	105.656	85.589	1.14227	1.33409
CSNK1G1	15	64165525	64356174	-	546.779	74.2371	60.1898	60.7532	0.00332271	0.0177121	1.23429	0.303685	1.23429	70.7182	57.2945	1.08523	1.40383
TRABD2B	1	47760528	47997386	-	24.9373	4.57454	2.51526	2.77082	0.424375	0.610512	1.23391	0.303232	1.23391	3.64243	2.95195	-1.37239	2.08949
ITPRIP	10	104309698	104338466	-	546.66	75.2761	60.2988	60.74	0.000299704	0.00262533	1.23387	0.303188	1.23387	70.6685	57.2739	1.12169	1.35727
TP53BP1	15	43403061	43510729	-	532.585	67.3577	58.8667	59.1761	0.000571509	0.00436023	1.23366	0.302945	1.23366	66.8442	54.1837	1.11283	1.36761
BRIX1	5	34915677	34925997	+	357.605	47.8952	39.488	39.7339	0.00314781	0.0169623	1.23345	0.302699	1.23345	42.7891	34.6906	1.08812	1.39819
TSPO	22	43151547	43163243	+	654.523	85.7427	72.2561	72.7247	0.000778202	0.00556202	1.23323	0.302436	1.23323	83.2181	67.48	1.10793	1.37269
MAGOH	1	53226900	53238519	-	77.7414	9.97556	8.57599	8.63793	0.0336067	0.103946	1.23304	0.302221	1.23304	9.09641	7.37721	1.0163	1.496
TNFRSF21	6	47231532	47309906	-	731.998	109.688	80.3824	81.3331	0.00716598	0.0324139	1.23282	0.301961	1.23282	95.5152	77.4771	1.0706	1.41962
GJA3	13	20138255	20161053	-	10.8491	1.95882	1.05781	1.20545	0.629592	0.774311	1.2328	0.301938	1.2328	1.57139	1.27465	-1.78248	2.709
USP33	1	77695987	77759853	-	233.337	31.4886	25.7509	25.9263	0.00510765	0.0248726	1.23267	0.301787	1.23267	29.6291	24.0365	1.07405	1.41472
HMOX2	16	4474690	4510348	+	451.471	62.3956	49.6782	50.1634	0.00217817	0.0127513	1.23254	0.301629	1.23254	58.8528	47.7494	1.09163	1.39163
PAPOLA	14	96501433	96567112	+	1876.57	230.951	207.674	208.508	2.57078e-05	0.000355798	1.23231	0.301371	1.23231	230.715	187.221	1.14393	1.32753
ILK	11	6603708	6610875	+	1255.83	164.307	138.503	139.537	3.24136e-05	0.00042608	1.23228	0.301331	1.23228	162.979	132.258	1.14228	1.32938
ERCC4	16	13920154	13952349	+	166.602	21.8299	18.4158	18.5113	0.00816421	0.0357473	1.23214	0.301162	1.23214	20.1454	16.35	1.06625	1.42383
SESN3	11	95165513	95232542	-	133.421	20.3237	14.4868	14.8246	0.0884575	0.210673	1.23186	0.30084	1.23186	17.7576	14.4153	-1.04541	1.58639
ALMS1	2	73385758	73625167	+	362.831	45.2703	40.0981	40.3145	0.00223045	0.0130224	1.23155	0.300475	1.23155	44.2069	35.8954	1.08932	1.39235
RLF	1	40161387	40240922	+	155.951	21.0118	17.1868	17.3279	0.0166512	0.0615888	1.2315	0.300412	1.2315	19.8239	16.0974	1.03992	1.45836
SNRPE	1	203861599	203871153	+	108.083	14.1563	11.8908	12.0092	0.0558766	0.150464	1.2314	0.300295	1.2314	13.151	10.6797	-1.00923	1.53033
MBP	18	76978827	77133684	-	406.818	55.5628	44.8897	45.202	0.000971788	0.00664163	1.23119	0.300048	1.23119	52.2294	42.4221	1.10467	1.37219
GAB1	4	143336762	143474569	+	48.4791	5.9515	5.34713	5.38657	0.0775731	0.191942	1.23106	0.299905	1.23106	5.68258	4.616	-1.03111	1.56267
LPIN2	18	2916994	3013316	-	246.669	34.3001	27.1319	27.4076	0.00827355	0.0360753	1.23097	0.299793	1.23097	32.0687	26.0516	1.06261	1.426
PIK3R3	1	46040140	46133037	-	51.2322	6.88714	5.58893	5.69246	0.125814	0.270414	1.23078	0.299578	1.23078	5.96574	4.8471	-1.10382	1.67211
TNIP2	4	2741648	2756343	-	388.182	52.8588	42.8535	43.1313	0.000586334	0.00443798	1.23051	0.299256	1.23051	49.8482	40.5102	1.11238	1.36119
PARP4	13	24420931	24512779	-	1017.74	130.973	112.401	113.082	0.00139397	0.00892412	1.23001	0.298664	1.23001	127.185	103.402	1.09809	1.37776
TMEM67	8	93754844	93819235	+	37.9464	5.23365	4.17498	4.21626	0.159846	0.317702	1.2299	0.298545	1.2299	4.7484	3.86079	-1.0876	1.64517
STAT6	12	57095408	57132140	-	1095.21	136.072	121.195	121.69	7.88032e-05	0.000884443	1.2299	0.298543	1.2299	133.887	108.86	1.1332	1.33486
GRPEL1	4	7058895	7068065	-	320.535	41.4004	35.4506	35.6149	0.00153957	0.00963726	1.22945	0.298011	1.22945	38.8918	31.6336	1.09736	1.37743
KYAT3	1	88935773	88992954	-	60.5398	8.78986	6.64433	6.72664	0.0820932	0.199619	1.22942	0.297983	1.22942	7.91696	6.43957	-1.02961	1.55623
AC012618.1	19	12260126	12260538	+	15.8019	2.26797	1.73086	1.75577	0.299759	0.487418	1.22916	0.297674	1.22916	1.95953	1.5942	-1.24952	1.88782
PITPNM2	12	122983480	123150016	-	388.26	55.8081	42.4987	43.14	0.0028981	0.0159152	1.22861	0.297031	1.22861	52.0555	42.3693	1.08666	1.38911
RAD1	5	34905260	34918990	-	269.179	34.8165	29.7293	29.9088	0.00584287	0.0276001	1.22855	0.296954	1.22855	33.3628	27.1563	1.06921	1.41164
CCDC191	3	113964137	114056595	-	23.412	3.49828	2.51454	2.60133	0.333292	0.523356	1.228	0.296316	1.228	3.00309	2.4455	-1.2844	1.93687
TNPO1P2	17	18460391	18463056	+	9.97782	1.57123	1.08399	1.10865	0.497201	0.673219	1.22793	0.296232	1.22793	1.15151	0.937762	-1.38974	2.09548
GALNT2	1	230057990	230282123	+	3048.05	418.938	335.721	338.672	0.000491781	0.00387331	1.22775	0.296022	1.22775	395.255	321.933	1.11145	1.35623
SBNO2	19	1107637	1174269	-	1236.51	162.841	136.652	137.39	0.000749526	0.00539464	1.22758	0.295812	1.22758	153.952	125.412	1.107	1.36128
REV1	2	99400475	99490036	-	174.713	21.9024	19.3159	19.4125	0.0078764	0.0348575	1.22707	0.295223	1.22707	21.4366	17.4696	1.06199	1.41782
PBX2P1	3	143176327	143177618	+	14.2344	2.73293	1.49619	1.5816	0.365158	0.555529	1.22674	0.294834	1.22674	1.51715	1.23673	-1.41619	2.13122
ZNF200	16	3222325	3236222	-	83.3848	10.601	9.16175	9.26498	0.0795507	0.195316	1.22662	0.294693	1.22662	10.0818	8.21911	-1.04014	1.565
RPPH1	14	20343075	20343408	-	20.8302	4.75752	1.8915	2.31446	0.509613	0.683975	1.22622	0.294223	1.22622	2.87486	2.34448	-2.12813	3.19992
PSMG4	6	3231403	3303374	+	125.536	16.1153	13.8499	13.9484	0.0229384	0.0780885	1.22609	0.294061	1.22609	14.8586	12.1187	1.03064	1.4586
HM13	20	31514410	31577924	+	2165.87	291.356	238.781	240.652	2.23264e-05	0.000315554	1.22608	0.294051	1.22608	281.639	229.707	1.14184	1.31653
DEPDC1B	5	60596912	60700191	-	194.727	24.4841	21.4819	21.6363	0.00976414	0.0410631	1.22574	0.293648	1.22574	22.8976	18.6807	1.05582	1.423
XRCC6P2	X	150231075	150232897	-	35.1176	5.07835	3.84984	3.90196	0.183065	0.349351	1.22553	0.293406	1.22553	4.36647	3.56292	-1.12648	1.69188
PSMB4	1	151399560	151401938	+	1838.03	228.997	203.444	204.225	2.98918e-05	0.000399466	1.22542	0.293275	1.22542	226.95	185.202	1.13891	1.3185
TVP23B	17	18781111	18806715	+	261.878	32.6962	28.9615	29.0975	0.00278082	0.0153829	1.2253	0.293139	1.2253	32.4011	26.4433	1.08364	1.38548
AC005261.1	19	57304305	57308563	+	41.0717	5.46601	4.51196	4.56352	0.124226	0.268284	1.22525	0.293072	1.22525	4.75813	3.8834	-1.07924	1.62019
METTL1	12	57768471	57772120	-	213.58	28.8467	23.5712	23.7311	0.0171979	0.0630108	1.22513	0.292934	1.22513	26.1644	21.3564	1.04515	1.4361
C15orf48	15	45430529	45448762	+	16.7366	2.56179	1.7256	1.85963	0.451731	0.635546	1.22507	0.292861	1.22507	2.06054	1.68198	-1.58002	2.37128
PANX2	22	50170731	50180296	+	230.696	32.1127	25.4653	25.6328	0.00797362	0.0351593	1.225	0.292788	1.225	29.0988	23.754	1.06342	1.41114
GABPB1	15	50275392	50355409	-	204.894	25.6328	22.6588	22.766	0.00553375	0.0264288	1.22415	0.291777	1.22415	25.1216	20.5217	1.0697	1.4009
RAB12	18	8609437	8639383	+	229.247	31.0148	25.2257	25.4719	0.0293314	0.0941829	1.22391	0.2915	1.22391	28.4948	23.2817	1.01453	1.47651
METTL23	17	76726830	76733937	+	210.215	27.9124	23.2601	23.3573	0.0038577	0.0198922	1.22385	0.291426	1.22385	25.8776	21.1444	1.07989	1.387
AP001885.3	11	67252336	67261546	-	12.2564	2.11341	1.31987	1.36182	0.368155	0.558269	1.22369	0.291238	1.22369	1.31796	1.07704	-1.33605	2.00062
CAPZA1P2	2	159462417	159463257	-	21.9584	3.44303	2.3703	2.43982	0.420518	0.60703	1.2236	0.291134	1.2236	2.53144	2.06885	-1.27051	1.9022
SLC2A13	12	39755025	40106090	-	115.456	15.086	12.7155	12.8285	0.0204059	0.0714614	1.22279	0.290177	1.22279	13.1945	10.7905	1.03626	1.44289
FAM124A	13	51222334	51284240	+	57.2898	7.47885	6.29721	6.36554	0.0965273	0.22446	1.22215	0.289416	1.22215	7.17294	5.86914	-1.06092	1.58463
MGRN1	16	4616493	4690975	+	1860.42	241.003	205.677	206.713	2.96064e-05	0.000396389	1.22204	0.28929	1.22204	235.795	192.952	1.13707	1.31336
NAAA	4	75913660	75941014	-	193.665	24.7722	21.401	21.5183	0.00535514	0.0257689	1.22199	0.289238	1.22199	24.469	20.0238	1.07061	1.39478
LINC00839	10	42475480	42495338	+	20.0317	3.56141	2.08424	2.22575	0.457134	0.63964	1.22197	0.289205	1.22197	2.84384	2.32726	-1.34312	2.00555
FP565260.1	21	5130871	5154659	-	322.931	44.2066	35.6012	35.8812	0.0146113	0.05572	1.22158	0.288745	1.22158	38.508	31.5232	1.04758	1.42447
TRMT10B	9	37753803	37778973	+	62.1057	8.52691	6.80765	6.90063	0.0885021	0.210744	1.22147	0.288614	1.22147	7.08287	5.79866	-1.05003	1.56662
LINS1	15	100559369	100603231	-	88.3049	12.8231	9.71548	9.81165	0.0438039	0.125832	1.22088	0.287918	1.22088	11.4683	9.3935	1.00687	1.48036
MTHFD2P7	3	179464346	179465329	+	13.2269	2.04785	1.45043	1.46965	0.382227	0.570975	1.22076	0.287775	1.22076	1.66633	1.36499	-1.28682	1.91768
SIK1	21	43414483	43427132	-	179.796	27.5653	19.4298	19.9773	0.189914	0.357999	1.2206	0.287592	1.2206	20.011	16.3944	-1.08736	1.62003
CNPY2	12	56309842	56316120	-	327.071	45.537	36.003	36.3412	0.0216187	0.0747651	1.22059	0.287576	1.22059	38.746	31.7438	1.03246	1.44299
ARPC3P1	20	49134480	49135013	+	9.20615	1.39423	1.00305	1.02291	0.428085	0.614199	1.22014	0.287051	1.22014	1.04545	0.856826	-1.40153	2.08654
LINC00488	3	109178143	109216966	+	32.1421	4.39156	3.52085	3.57134	0.172701	0.335864	1.21988	0.28674	1.21988	4.07872	3.34354	-1.14107	1.69804
ARL2	11	65014160	65022185	+	1020.04	134.413	112.766	113.338	0.000340441	0.00290297	1.21963	0.286438	1.21963	128.233	105.142	1.11336	1.33603
GALK2	15	49155656	49367870	+	124.869	17.7248	13.7522	13.8743	0.0273125	0.0890648	1.21938	0.286147	1.21938	14.4151	11.8216	1.0239	1.45218
WBP1P2	2	87972656	87973083	+	21.42	3.13998	2.32228	2.38	0.255382	0.436575	1.21934	0.286104	1.21934	2.69176	2.20755	-1.25969	1.8729
UBE2Z	17	48908407	48929057	+	1439.63	188.936	158.989	159.959	0.000158529	0.00157607	1.21908	0.28579	1.21908	183.722	150.706	1.12083	1.32594
TMEM109	11	60914158	60923444	+	1356.27	170.785	150.07	150.697	5.85873e-05	0.000695017	1.21897	0.285661	1.21897	169.456	139.016	1.12957	1.31544
CYB5A	18	74250846	74291974	-	436.212	56.0863	48.1386	48.468	0.00451177	0.0224744	1.21892	0.285602	1.21892	51.2939	42.0815	1.07429	1.38302
KIAA1211L	2	98793846	98936260	-	15.0618	3.56816	1.5218	1.67353	0.662006	0.796514	1.2187	0.285348	1.2187	2.21733	1.81941	-1.42893	2.12231
THAP6	4	75513946	75550474	+	75.0699	11.0402	8.22206	8.3411	0.121045	0.263274	1.21858	0.285206	1.21858	9.55573	7.84167	-1.06385	1.57976
PRMT5-AS1	14	22918947	22926901	+	32.4841	4.75508	3.57316	3.60935	0.21897	0.394547	1.21838	0.284962	1.21838	3.94017	3.23395	-1.12163	1.665
STIM2	4	26857601	27025382	+	173.617	21.9574	19.2104	19.2908	0.00641751	0.0297017	1.21826	0.284817	1.21826	21.5362	17.6779	1.06644	1.39168
CHORDC1P4	18	2945550	2946891	-	110.121	15.3028	12.1333	12.2356	0.0483414	0.13519	1.21799	0.284506	1.21799	13.8561	11.3762	1.0004	1.48292
QSOX2	9	136206333	136245813	-	408.145	52.7258	44.9552	45.3494	0.00639256	0.0296148	1.21767	0.28412	1.21767	47.0549	38.6435	1.06663	1.39009
NUPR1	16	28532708	28539009	-	84.3845	13.449	9.01119	9.37605	0.189162	0.357002	1.21747	0.283883	1.21747	11.7243	9.63005	-1.1038	1.63607
RPS15AP38	22	36421273	36421645	-	19.796	2.71287	2.17064	2.19956	0.281372	0.466777	1.2174	0.283807	1.2174	2.32282	1.90801	-1.2098	1.79301
STOM	9	121338987	121370305	-	1312.02	174.926	144.759	145.779	0.00324351	0.0173867	1.21706	0.283403	1.21706	165.533	136.01	1.07927	1.37244
LARP4	12	50392383	50480005	+	704.051	91.0639	77.9029	78.2279	0.000212753	0.00199766	1.21683	0.283131	1.21683	87.8577	72.202	1.11687	1.32574
WDR19	4	39182504	39285811	+	42.3502	6.12191	4.64679	4.70558	0.171936	0.334891	1.21617	0.282344	1.21617	4.96558	4.08297	-1.10283	1.63117
GRINA	8	143990056	143993416	+	2635.14	341.344	291.205	292.793	6.1903e-05	0.000728337	1.21594	0.282069	1.21594	334.714	275.272	1.12754	1.31126
CWC25	17	38800441	38825356	-	176.541	22.5916	19.4888	19.6157	0.0122299	0.048777	1.21578	0.281877	1.21578	20.646	16.9818	1.05067	1.40683
PER1	17	8140472	8156507	-	135.692	19.2492	14.9351	15.0769	0.034443	0.105909	1.21547	0.281515	1.21547	15.6858	12.9051	1.01459	1.45612
PLAGL2	20	32192504	32207744	-	475.325	60.8903	52.5254	52.8139	0.000444912	0.00358274	1.21524	0.281247	1.21524	55.3652	45.5589	1.1078	1.33311
AC135050.1	16	31056460	31062804	+	30.0683	4.16583	3.24687	3.34093	0.278961	0.464267	1.21522	0.281217	1.21522	3.67125	3.02106	-1.25851	1.85852
AK7	14	96392128	96489428	+	17.6427	2.76557	1.86382	1.9603	0.314158	0.502526	1.21497	0.280919	1.21497	1.95527	1.60932	-1.39328	2.05669
PRDM10	11	129899706	130002836	-	101.254	12.9915	11.1222	11.2504	0.0676531	0.173369	1.2149	0.280833	1.2149	11.7559	9.67645	-1.02499	1.51286
NRL	14	24078662	24115011	-	10.669	1.75811	1.1487	1.18544	0.500968	0.676564	1.21479	0.280705	1.21479	1.13342	0.933015	-1.377	2.03205
PLEKHN1	1	966482	975866	+	96.3471	15.5056	10.4986	10.7052	0.148847	0.30271	1.21476	0.280671	1.21476	12.4993	10.2895	-1.07385	1.58461
FTH1P5	6	50912712	50913257	-	12.6583	1.94879	1.3802	1.40648	0.480425	0.65989	1.21458	0.280452	1.21458	1.61147	1.32678	-1.33531	1.96984
SF3A3P1	20	3489529	3491006	-	25.6494	3.73948	2.78423	2.84993	0.355698	0.546382	1.21427	0.280095	1.21427	2.94202	2.42286	-1.22324	1.80361
WDFY1	2	223855716	223945358	-	585.767	77.5798	64.7202	65.0852	0.000277007	0.00247019	1.21424	0.280052	1.21424	74.6421	61.4724	1.1129	1.32481
TRIM46	1	155173787	155184972	+	32.6071	4.54338	3.58106	3.62301	0.214618	0.389343	1.21406	0.279845	1.21406	3.86624	3.18454	-1.1342	1.67175
SPAG5-AS1	17	28598790	28617378	+	17.1459	2.61688	1.85323	1.9051	0.386397	0.574801	1.214	0.279763	1.214	1.9882	1.63773	-1.31779	1.94214
NCOA5	20	46060991	46089963	-	494.027	62.0176	54.6799	54.8919	0.000479938	0.00379669	1.21399	0.279759	1.21399	59.1386	48.7142	1.10651	1.33192
ABCG1	21	42199689	42297245	+	11.0347	2.4051	1.10757	1.22608	0.425533	0.611671	1.21385	0.279592	1.21385	1.24369	1.02458	-1.76188	2.59602
WDR48	3	39052013	39096672	+	234.426	31.5638	25.8773	26.0473	0.0211155	0.0733782	1.21369	0.279399	1.21369	29.031	23.9197	1.03979	1.41667
PGK1	X	77910739	78129296	+	5590.69	695.169	618.998	621.188	1.08568e-05	0.000173878	1.21342	0.279082	1.21342	694.008	571.942	1.13885	1.29288
CAPRIN1	11	34051731	34102611	+	3960.22	506.26	438.461	440.024	2.62456e-05	0.000360807	1.21295	0.278523	1.21295	489.535	403.59	1.13259	1.29901
USP1	1	62436297	62451805	+	418.539	54.3993	46.2612	46.5043	0.00323886	0.0173747	1.21253	0.278025	1.21253	49.7466	41.027	1.07886	1.36277
EIF3M	11	32583798	32606265	+	1183.79	146.767	131.094	131.533	6.67269e-05	0.000773937	1.21247	0.277954	1.21247	144.629	119.284	1.12495	1.30681
AL034370.1	X	44029332	44030922	+	48.7196	6.16588	5.36899	5.41329	0.109907	0.245403	1.21239	0.277855	1.21239	5.71299	4.71217	-1.06248	1.56173
CABIN1	22	24011192	24178629	+	586.802	73.3628	64.948	65.2002	0.000569629	0.00434819	1.21219	0.277611	1.21219	70.5328	58.1864	1.10419	1.33074
AL592293.2	9	15055057	15056053	+	24.4467	3.66358	2.65445	2.7163	0.30078	0.488581	1.21206	0.277461	1.21206	2.86288	2.36199	-1.24221	1.82492
CCDC28A	6	138773509	138793320	+	32.4183	4.27767	3.55003	3.60203	0.230108	0.407612	1.21206	0.277458	1.21206	3.95187	3.26047	-1.16239	1.70764
HSP90AB2P	4	13333414	13338658	+	27.7188	4.01275	2.97955	3.07987	0.31699	0.505706	1.21204	0.277441	1.21204	3.38602	2.79364	-1.29674	1.90497
MRPS31	13	40729128	40771191	-	69.8156	8.79036	7.68401	7.75729	0.0750579	0.187246	1.2119	0.277276	1.2119	8.05647	6.64777	-1.03081	1.51396
MCM3	6	52264014	52284882	-	1075.03	140.447	118.283	119.448	0.00977396	0.0410804	1.21184	0.277204	1.21184	123.873	102.219	1.0543	1.39293
FASTKD2	2	206765357	206796190	+	465.344	58.7616	51.5078	51.7049	0.000581998	0.0044098	1.21174	0.277076	1.21174	57.6266	47.557	1.10253	1.33177
FBXO32	8	123497889	123541207	-	29.7673	5.21496	2.92124	3.30748	0.345372	0.535465	1.21139	0.276665	1.21139	4.5882	3.78755	-1.27333	1.86857
NAV3	12	77324641	78213011	+	141.006	25.2854	15.0426	15.6673	0.187372	0.354618	1.21139	0.276665	1.21139	19.3627	15.9838	-1.11475	1.63586
ODF2L	1	86346824	86396343	-	72.9811	9.34854	8.04783	8.10901	0.0836611	0.202269	1.21124	0.276487	1.21124	8.889	7.33875	-1.03502	1.51849
GART	21	33503931	33543492	-	843.567	106.662	93.3376	93.7296	0.000373118	0.00312563	1.2111	0.27632	1.2111	100.488	82.972	1.10812	1.32365
PHACTR4	1	28369582	28500365	+	669.967	87.2251	74.072	74.4408	0.00101338	0.00685273	1.21086	0.276031	1.21086	79.1959	65.4048	1.09553	1.33832
RPS27AP5	1	192716132	192716654	+	1103.17	144.859	122.069	122.574	0.000255048	0.00231022	1.21084	0.276008	1.21084	137.014	113.156	1.1119	1.31859
EXT1	8	117794490	118111827	-	429.546	56.1737	47.5191	47.7273	0.00262212	0.0146974	1.21053	0.275644	1.21053	52.0059	42.9611	1.08269	1.35348
NPM1P6	8	61202350	61203221	+	103.11	14.2844	11.3571	11.4567	0.0500913	0.138787	1.2102	0.27524	1.2102	11.9376	9.86416	-1.00212	1.46767
NUTF2P4	1	112748095	112748476	+	10.0649	1.6469	1.06725	1.11833	0.637871	0.779554	1.20984	0.274822	1.20984	1.13837	0.940921	-1.53202	2.24245
UTP14A	X	129906121	129929762	+	478.012	60.4189	52.9128	53.1124	0.000892606	0.00620977	1.20953	0.274441	1.20953	57.6112	47.6312	1.0967	1.33396
PAOX	10	133379261	133391695	+	16.8873	2.60902	1.75847	1.87637	0.321395	0.510296	1.20951	0.274425	1.20951	2.27013	1.8769	-1.49833	2.19194
AL096711.2	6	127438406	127519002	-	107.993	17.6997	11.657	11.9992	0.101902	0.232997	1.20951	0.274424	1.20951	11.2693	9.31722	-1.03522	1.51444
FZD7	2	202034587	202038446	+	315.143	49.5212	34.1576	35.0158	0.0971085	0.225337	1.20916	0.274008	1.20916	34.1583	28.2496	-1.03684	1.51594
PDP1	8	93857807	93926069	+	54.9299	8.05111	5.96393	6.10332	0.300177	0.487933	1.20905	0.273873	1.20905	6.95209	5.75005	-1.1651	1.70315
OSR1	2	19351485	19358624	-	113.083	16.6492	12.3153	12.5648	0.0798404	0.195765	1.20885	0.273633	1.20885	15.1189	12.5068	-1.02746	1.50145
RPL5P1	15	24908932	24909826	-	13.8579	2.00629	1.50185	1.53977	0.471452	0.652239	1.20883	0.27361	1.20883	1.69547	1.40257	-1.36747	1.99824
PRR5L	11	36296288	36465205	+	34.2281	5.4311	3.72627	3.80312	0.280303	0.465873	1.20852	0.273244	1.20852	4.3472	3.59712	-1.18291	1.72768
ING3	7	120950763	120977217	+	42.1655	6.54204	4.58419	4.68506	0.36079	0.551035	1.20848	0.273189	1.20848	5.0609	4.18784	-1.18287	1.72749
FAM72A	1	206186179	206204415	-	52.9958	8.09058	5.71828	5.88843	0.214869	0.389659	1.2083	0.272975	1.2083	5.7586	4.76588	-1.14682	1.67433
PIK3CD-AS2	1	9672426	9687556	-	15.9994	3.06101	1.69633	1.77771	0.395788	0.583572	1.20828	0.272952	1.20828	1.57652	1.30477	-1.27874	1.86687
SCNN1A	12	6346843	6377731	-	55.9261	9.68217	5.97267	6.21401	0.333189	0.523296	1.20796	0.272578	1.20796	7.60193	6.29318	-1.18284	1.72597
NPEPPSP1	17	38195703	38257193	-	49.9905	7.12667	5.44694	5.55449	0.196108	0.36593	1.20727	0.271745	1.20727	5.88202	4.87218	-1.14912	1.67484
AL133453.1	14	52640839	52641567	+	15.1163	2.86971	1.07439	1.67958	0.741681	0.851446	1.20639	0.270695	1.20639	2.16421	1.79396	-4.83717	7.03988
DAB2IP	9	121567057	121785531	+	288.037	37.9679	31.8037	32.0041	0.0177841	0.0645005	1.20638	0.270689	1.20638	34.8247	28.867	1.03813	1.40191
MIER2	19	301444	344816	-	237.507	30.4658	26.2849	26.3896	0.00564212	0.0268393	1.20611	0.270367	1.20611	28.5111	23.6388	1.06662	1.36385
SMC3P1	2	99102018	99102753	+	22.3391	3.01923	2.46232	2.48212	0.242336	0.421476	1.20593	0.270145	1.20593	2.83365	2.34976	-1.16442	1.69337
NUMB	14	73275107	73458618	-	739.946	98.5574	81.8872	82.2163	0.00120393	0.00789396	1.20551	0.269643	1.20551	89.4292	74.1837	1.09275	1.3299
SCARB2	4	76158737	76234537	-	863.38	115.313	95.4302	95.9311	0.00391858	0.0201483	1.20523	0.269306	1.20523	105.737	87.7317	1.07153	1.35561
ARFGAP3	22	42796502	42858107	-	137.135	18.6664	15.0979	15.2373	0.0358438	0.108957	1.20502	0.26906	1.20502	17.5406	14.5563	1.00838	1.44002
CLUAP1	16	3500976	3539049	+	115.866	16.0496	12.7722	12.874	0.0434805	0.125163	1.20493	0.268953	1.20493	14.7534	12.2442	1.00758	1.44093
HEBP1	12	12974870	13000266	-	230.921	31.6553	25.404	25.6579	0.0134384	0.0524323	1.20475	0.268734	1.20475	29.9523	24.8618	1.04558	1.38816
CAPZA1P1	X	88096393	88097226	-	78.8979	10.1183	8.73056	8.76644	0.0460039	0.130405	1.20425	0.268134	1.20425	9.84447	8.17477	1.00389	1.4446
PGAM4	X	77967949	77969639	-	102.634	12.9324	11.3409	11.4037	0.0429391	0.124043	1.204	0.267833	1.204	12.1713	10.1091	1.00494	1.44249
DHX8	17	43483865	43610339	+	511.751	64.727	56.6539	56.8612	0.00111857	0.00743956	1.20395	0.267778	1.20395	62.5489	51.953	1.09159	1.32789
AC005726.1	17	28455752	28614186	-	12.1446	2.26374	1.26054	1.3494	0.303272	0.4912	1.20395	0.267776	1.20395	1.64029	1.36242	-1.55558	2.25481
IFT88	13	20567069	20691438	+	74.7539	10.787	8.21405	8.30599	0.129131	0.275073	1.20354	0.26728	1.20354	8.80454	7.31556	-1.06324	1.54011
GANC	15	42273233	42356936	+	88.6374	11.9214	9.80018	9.8486	0.0433536	0.124931	1.20349	0.267219	1.20349	11.1028	9.22551	1.0063	1.43932
PRR15	7	29563835	29567294	+	182.721	25.7085	20.0915	20.3023	0.0808831	0.197412	1.20319	0.266866	1.20319	21.9889	18.2755	-1.02114	1.47827
PEX11A	15	89677764	89690784	-	40.7772	5.67241	4.48696	4.5308	0.172762	0.335907	1.20308	0.266728	1.20308	5.14894	4.27981	-1.10014	1.59233
C1orf174	1	3889125	3900294	-	165.753	20.8799	18.3162	18.417	0.00955104	0.0403559	1.20302	0.266662	1.20302	19.159	15.9257	1.05348	1.37379
COA6	1	234373456	234385081	+	212.753	28.9201	23.4727	23.6392	0.00942045	0.0399468	1.20266	0.266224	1.20266	24.3831	20.2744	1.05362	1.37278
TBC1D30	12	64759484	64881034	+	74.7495	10.0608	8.24642	8.3055	0.103744	0.235712	1.20261	0.266171	1.20261	8.91011	7.40896	-1.03594	1.49826
PCDHB6	5	141150022	141153288	+	18.7231	2.66238	2.00001	2.08035	0.326393	0.515445	1.20234	0.265845	1.20234	2.46404	2.04937	-1.35426	1.95775
AC012073.1	2	24825610	24826718	+	27.059	4.46365	2.9389	3.00655	0.288103	0.474698	1.20226	0.26575	1.20226	2.94816	2.45218	-1.1876	1.7166
SPACA6	19	51689128	51712388	+	59.0944	9.24047	6.47464	6.56605	0.190228	0.358215	1.2022	0.26568	1.2022	7.36617	6.12723	-1.10262	1.59361
TCIM	8	40153482	40155311	+	220.184	31.1063	24.0821	24.4649	0.0848735	0.204237	1.20219	0.26566	1.20219	27.3939	22.7868	-1.0568	1.52734
TXLNA	1	32179675	32198286	+	999.493	126.621	110.602	111.055	0.000394201	0.00325278	1.2016	0.264962	1.2016	124.206	103.367	1.10229	1.30987
AL358942.1	6	112616703	112617881	-	263.801	34.2398	29.194	29.3112	0.00641213	0.0296863	1.20145	0.264778	1.20145	31.7045	26.3885	1.06315	1.35774
BHLHE40	3	4979437	4985324	+	2271.66	301.82	250.977	252.407	8.55092e-05	0.000950058	1.20138	0.264692	1.20138	289.141	240.674	1.1171	1.29202
PCOLCE2	3	142815922	142889207	-	126.696	17.9686	13.8866	14.0773	0.0608371	0.160159	1.20133	0.264628	1.20133	16.535	13.7639	-1.01161	1.45993
RUNX1	21	34787801	36004668	-	313.569	44.6945	34.4936	34.841	0.00555123	0.0264947	1.20132	0.264617	1.20132	40.8707	34.0215	1.06599	1.35383
SFXN5	2	72942036	73075620	-	347.691	43.0897	38.429	38.6323	0.0105532	0.0435153	1.20115	0.264422	1.20115	42.1555	35.0958	1.04973	1.37443
CES2	16	66934444	66945097	+	589.278	78.9345	65.091	65.4754	0.000817841	0.00577351	1.20103	0.264272	1.20103	74.9441	62.3999	1.09432	1.31815
SLC9B2	4	103019868	103085830	-	63.6994	10.0585	6.97078	7.07771	0.179489	0.344817	1.20051	0.263647	1.20051	7.32841	6.10441	-1.09861	1.58334
EIF4A1P4	12	53153272	53154485	+	48.0468	7.23436	5.29605	5.33853	0.190207	0.358215	1.20041	0.263527	1.20041	5.83082	4.85735	-1.08355	1.56138
SLC25A21	14	36677921	37172607	-	13.4764	2.36706	1.46675	1.49738	0.467955	0.649386	1.20031	0.263409	1.20031	1.7629	1.4687	-1.31797	1.89886
UPK3BL2	7	102538417	102543850	-	10.5504	1.88016	1.03302	1.17227	0.343796	0.534072	1.20013	0.263193	1.20013	1.16998	0.974873	-1.90697	2.74664
ZNF410	14	73886617	73932522	+	286.158	35.2532	31.6871	31.7953	0.00334771	0.0177966	1.19997	0.263002	1.19997	34.6783	28.8992	1.07308	1.34187
ZNF217	20	53567065	53609908	-	701.518	90.7147	77.6133	77.9464	0.000250363	0.00227497	1.19985	0.262857	1.19985	88.0693	73.4001	1.10646	1.30112
ADGRA2	8	37784191	37844897	+	101.125	13.6069	11.0585	11.2362	0.0979109	0.226832	1.19984	0.262836	1.19984	13.2525	11.0452	-1.03951	1.49649
RIOK1	6	7389793	7418038	+	115.597	15.8752	12.7257	12.8441	0.0886855	0.211076	1.19976	0.262746	1.19976	14.4251	12.0233	-1.02544	1.47604
ANKRD6	6	89433152	89633835	+	36.945	5.51691	3.95085	4.105	0.444115	0.628291	1.1997	0.26268	1.1997	4.70573	3.92241	-1.29187	1.85938
MED14OS	X	40735400	40738702	+	19.0562	3.82623	2.00649	2.11736	0.39944	0.586924	1.1997	0.262671	1.1997	1.98594	1.65536	-1.37152	1.974
ANKRD20A5P	18	14179097	14252141	+	22.8145	3.07471	2.50974	2.53495	0.265958	0.448814	1.19962	0.262583	1.19962	2.89258	2.41124	-1.17975	1.69777
LINC01399	22	35119824	35231057	-	20.0435	3.25941	2.14332	2.22706	0.337217	0.527322	1.19949	0.262425	1.19949	2.11563	1.76377	-1.30003	1.87046
ZFP36L1	14	68787660	68796254	-	2385.89	329.174	262.273	265.099	0.000315505	0.00274201	1.19948	0.262414	1.19948	312.87	260.837	1.10378	1.30348
VPS16	20	2840703	2866733	+	449.473	60.5728	49.6798	49.9414	0.00140599	0.00898108	1.19947	0.262395	1.19947	56.8025	47.3564	1.08719	1.32334
AL035411.1	1	58630841	58631531	-	236.047	31.784	26.0938	26.2274	0.0154295	0.0581326	1.19932	0.262221	1.19932	28.8682	24.0704	1.0405	1.38239
YBX3	12	10699089	10723324	-	2554.2	328.264	282.034	283.8	0.000959276	0.0065906	1.19932	0.262216	1.19932	323.335	269.598	1.08925	1.32052
CTSC	11	88293592	88337762	-	604.6	74.8576	66.8852	67.1778	0.000753132	0.00541591	1.19896	0.261779	1.19896	70.8715	59.1109	1.0938	1.31423
CASC19	8	127072694	127227542	-	85.2214	16.4712	8.85993	9.46904	0.580707	0.737355	1.19883	0.261623	1.19883	10.7831	8.99475	-1.38589	1.99179
ZC3HAV1	7	139043515	139109721	-	1445.97	193.378	159.683	160.664	0.0073974	0.0332617	1.19843	0.261143	1.19843	170.35	142.144	1.06289	1.35125
ZNF229	19	44417519	44448579	-	24.6197	3.44075	2.65825	2.73553	0.265165	0.448184	1.19834	0.261041	1.19834	2.76781	2.3097	-1.27034	1.82424
TMA16	4	163494442	163520540	+	137.956	18.9383	15.1785	15.3285	0.0905754	0.21419	1.19822	0.260891	1.19822	17.0834	14.2574	-1.02689	1.47434
ATRNL1	10	115093365	115949000	+	11.2989	2.01285	1.08233	1.25543	0.566027	0.726561	1.19806	0.2607	1.19806	1.69949	1.41854	-1.73382	2.48864
NOP56	20	2652593	2658394	+	2457.7	315.957	271.428	273.078	0.00622629	0.029021	1.19798	0.260609	1.19798	292.509	244.167	1.05915	1.35501
VAMP8	2	85561562	85582032	+	190.101	24.8595	20.9319	21.1223	0.0160276	0.0596817	1.19751	0.26004	1.19751	24.5632	20.5119	1.03903	1.38017
AC073073.1	7	105530209	105530672	+	48.0284	6.41046	5.25817	5.33648	0.145384	0.2974	1.19733	0.259816	1.19733	6.24874	5.21892	-1.09729	1.57307
AC211486.6	7	75316048	75327766	-	12.0664	1.97394	1.28177	1.34071	0.51993	0.69241	1.19714	0.259592	1.19714	1.5199	1.26961	-1.51315	2.16857
UBE2D3P1	20	5292388	5292832	-	51.5971	6.97808	5.68312	5.73301	0.163862	0.323757	1.197	0.259423	1.197	6.37814	5.32844	-1.08424	1.55351
AKR1C4	10	5195462	5218950	+	9.87801	1.63987	1.05388	1.09756	0.414567	0.601552	1.19686	0.25926	1.19686	1.00954	0.843491	-1.43479	2.05532
UBOX5	20	3107573	3160197	-	126.995	17.5753	14.0188	14.1105	0.0363683	0.109993	1.19653	0.258862	1.19653	14.7133	12.2966	1.01276	1.41365
H2BC19P	1	149842875	149846487	+	33.7006	5.46691	3.49975	3.74452	0.537014	0.706026	1.19649	0.258806	1.19649	3.54032	2.95892	-1.40665	2.01374
QRICH2	17	76274049	76307999	-	20.5318	2.96578	2.20758	2.28131	0.337883	0.528128	1.19643	0.258735	1.19643	2.31167	1.93214	-1.3309	1.90511
LMF2	22	50502949	50507703	-	969.703	130.189	107.152	107.745	0.000619854	0.00463551	1.19632	0.258602	1.19632	122.685	102.552	1.09536	1.30659
NDUFV2P1	19	53223973	53224880	-	115.052	15.5006	12.6845	12.7835	0.0425436	0.123247	1.19624	0.258507	1.19624	13.1605	11.0015	1.00494	1.42395
SH2D4A	8	19313693	19396219	+	686.118	85.1153	75.9798	76.2354	0.000796823	0.00566691	1.19609	0.25833	1.19609	83.1804	69.5434	1.09139	1.31084
NEDD4L	18	58044226	58401541	+	337.313	43.7987	37.21	37.4792	0.00584114	0.0276001	1.19592	0.258126	1.19592	38.4438	32.1456	1.06378	1.34448
HMGA1P8	2	74418122	74418443	-	28.8363	4.53144	3.13967	3.20404	0.455483	0.638325	1.19588	0.258078	1.19588	3.47121	2.90263	-1.23295	1.76329
C4orf46	4	158666675	158672256	-	156.796	20.8399	17.2606	17.4217	0.047189	0.132823	1.19568	0.257826	1.19568	17.9441	15.0075	1.00293	1.42546
MSN	X	65588377	65741932	+	6548.87	900.789	716.877	727.652	0.000100631	0.00107966	1.19558	0.257706	1.19558	875.279	732.098	1.11207	1.28535
FAM133B	7	92560758	92590394	-	102.584	13.6221	11.334	11.3982	0.0599636	0.158556	1.19548	0.257596	1.19548	12.1967	10.2023	-1.00765	1.44011
GINS3	16	58295080	58406148	+	164.409	22.4086	18.0056	18.2677	0.0942073	0.220331	1.19546	0.257571	1.19546	19.4089	16.2355	-1.06159	1.51715
HIVEP1	6	12008762	12165000	+	240.387	30.3602	26.6159	26.7096	0.00652916	0.0301202	1.19544	0.25754	1.19544	29.2589	24.4754	1.05892	1.34956
AC020688.1	8	127086263	127087511	-	54.4311	6.93011	6.01265	6.0479	0.129623	0.275753	1.19536	0.257441	1.19536	6.63937	5.5543	-1.06029	1.51502
NCK1	3	136862208	136951607	+	89.5948	12.256	9.90031	9.95498	0.0644895	0.16714	1.19514	0.257176	1.19514	11.1063	9.29294	-1.01226	1.44586
TMEM35B	1	34981535	34985354	-	45.5142	6.22576	4.94386	5.05713	0.237625	0.416054	1.19513	0.25717	1.19513	5.79681	4.85035	-1.1775	1.68187
WASHC4	12	105107324	105169131	+	480.896	61.8777	53.2155	53.4329	0.00289939	0.0159162	1.19509	0.257125	1.19509	59.0511	49.4112	1.07286	1.33125
SERTAD3	19	40440844	40444336	-	257.436	35.6566	28.3536	28.604	0.0461083	0.130495	1.19507	0.257091	1.19507	32.4096	27.1195	1.01075	1.41299
MAK16	8	33485182	33501263	+	464.832	61.0988	51.4374	51.648	0.00422299	0.0213542	1.19497	0.256969	1.19497	56.4773	47.2627	1.06831	1.33664
S100A13	1	153618787	153631361	-	185.593	24.6799	20.4676	20.6215	0.00940727	0.0399128	1.1949	0.256884	1.1949	23.9018	20.0032	1.052	1.35719
FOXA3	19	45863989	45873798	+	9.56988	2.27174	1.00095	1.06332	0.536289	0.705524	1.19439	0.256273	1.19439	0.979817	0.82035	-1.5407	2.19791
ME2	18	50879080	50954258	+	434.828	55.4758	48.1152	48.3143	0.00294033	0.0160856	1.19437	0.256253	1.19437	53.762	45.0128	1.07395	1.3283
BCDIN3D-AS1	12	49827913	49841144	+	10.6081	1.99271	1.0141	1.17868	0.529361	0.699549	1.19429	0.256156	1.19429	1.45877	1.22145	-1.99559	2.84638
AL049629.2	11	33698261	33722468	-	52.8222	8.63113	5.71125	5.86914	0.297592	0.484994	1.19416	0.256001	1.19416	6.81687	5.70848	-1.18583	1.69103
GAPDHP38	19	46558641	46559643	+	15.5036	2.33296	1.65996	1.72263	0.372275	0.561932	1.19402	0.255828	1.19402	1.90948	1.5992	-1.42569	2.03258
PTGES3	12	56663341	56688409	-	3341.42	415.887	370.204	371.269	6.50677e-05	0.000757506	1.19399	0.255792	1.19399	402.099	336.768	1.11466	1.27897
PRRC2C	1	171485551	171593512	+	4008.88	510.965	444.005	445.431	0.000204818	0.00193707	1.19381	0.255575	1.19381	487.376	408.252	1.10527	1.28945
AKAP8	19	15353385	15379799	-	324.149	41.8455	35.8669	36.0165	0.00628032	0.0292083	1.19375	0.255496	1.19375	38.4481	32.2079	1.06204	1.34179
IQGAP2	5	76403285	76708133	+	207.179	30.0361	22.5975	23.0198	0.0600517	0.158681	1.19319	0.254819	1.19319	22.409	18.7808	-1.00611	1.43239
AL353705.4	9	78219120	78219358	+	22.815	4.26351	2.41865	2.53501	0.536268	0.705524	1.19308	0.254691	1.19308	2.35568	1.97445	-1.30874	1.86291
AC046134.2	3	139389761	139782700	+	14.7876	2.37881	1.60454	1.64307	0.498942	0.674832	1.19284	0.254401	1.19284	1.84935	1.55038	-1.3534	1.92571
RBBP4P1	5	14797125	14798401	-	55.0401	7.39837	6.03059	6.11557	0.19391	0.363291	1.19273	0.254273	1.19273	6.64544	5.5716	-1.12747	1.60395
AC011447.1	19	20125044	20125485	+	105.95	15.0465	11.6284	11.7722	0.125943	0.27057	1.1927	0.254227	1.1927	13.4811	11.3031	-1.04879	1.49193
AMBP	9	114060127	114078329	-	28.6815	3.82851	3.15142	3.18683	0.270403	0.454234	1.19252	0.254014	1.19252	3.53995	2.96846	-1.17328	1.66853
CD68	17	7579491	7582112	+	502.79	70.8135	54.5904	55.8655	0.000577562	0.00439008	1.19216	0.253574	1.19216	68.9524	57.8384	1.09404	1.29907
AC079328.1	15	62953173	62954125	+	13.7377	1.85851	1.47935	1.52641	0.447557	0.631468	1.19202	0.25341	1.19202	1.72349	1.44585	-1.42108	2.01923
JUNB	19	12791486	12793316	+	1525.45	220.58	166.59	169.495	0.0751959	0.187416	1.19191	0.253275	1.19191	197.817	165.967	-1.02212	1.45208
ZNF160	19	53066606	53103437	-	36.6329	5.20758	3.98862	4.07032	0.29781	0.485237	1.19174	0.25307	1.19174	4.38976	3.68349	-1.20772	1.71526
CAMKK2	12	121237675	121298309	-	623.043	82.603	68.9505	69.227	0.00142879	0.0090823	1.19172	0.25305	1.19172	77.197	64.7775	1.08364	1.31059
FOXC1	6	1609915	1613898	+	246.308	32.3583	27.196	27.3676	0.00544568	0.0260757	1.19155	0.252834	1.19155	28.0362	23.5293	1.06212	1.33674
NCOA3	20	47501887	47656878	+	1708.17	220.42	188.989	189.796	0.00207179	0.0122466	1.19145	0.252717	1.19145	203.475	170.779	1.07866	1.31603
RIPK1	6	3063991	3115188	+	266.162	35.5882	29.4357	29.5736	0.00965623	0.0407285	1.19142	0.252686	1.19142	33.0663	27.7536	1.05161	1.34982
ATOX1	5	151742316	151772533	-	208.848	28.2701	23.0789	23.2054	0.0169535	0.0624017	1.19138	0.252636	1.19138	26.1323	21.9344	1.03812	1.36727
TMUB2	17	44186970	44191930	+	251.865	34.6287	27.8535	27.985	0.0140562	0.0542099	1.19137	0.252624	1.19137	31.0641	26.0742	1.04369	1.35995
THUMPD1	16	20702816	20742085	-	450.581	56.8028	49.8846	50.0646	0.00301703	0.016399	1.1913	0.252533	1.1913	54.4729	45.7257	1.0711	1.32498
POU5F1	6	31164337	31180732	-	11.5239	1.88861	1.21339	1.28044	0.336823	0.52693	1.19108	0.25227	1.19108	1.36567	1.14658	-1.57368	2.23254
PPP1R12A	12	79773563	79935461	-	632.378	85.5722	69.7947	70.2643	0.00729026	0.0328725	1.19106	0.252249	1.19106	79.7557	66.9619	1.05728	1.34178
FRMD5	15	43870761	44195272	-	39.269	5.0592	4.32296	4.36322	0.190026	0.358116	1.19106	0.252247	1.19106	4.90536	4.11848	-1.1179	1.58587
DNASE2	19	12875209	12881467	-	281.382	36.276	31.1277	31.2647	0.0122497	0.0488154	1.19096	0.25212	1.19096	33.6234	28.2323	1.0463	1.35561
RNF25	2	218663892	218672003	-	180.17	22.7165	19.9338	20.0189	0.0187771	0.0673032	1.19059	0.251679	1.19059	21.3475	17.9302	1.03378	1.37119
CCNC	6	99542387	99568826	-	200.281	26.7873	22.119	22.2535	0.0194807	0.0691182	1.19055	0.251627	1.19055	25.164	21.1364	1.03228	1.37308
MTF2	1	93079235	93139080	+	144.539	18.7842	15.9495	16.0599	0.0421809	0.122542	1.19052	0.251597	1.19052	16.707	14.0333	1.00841	1.40552
ACAT1	11	108116695	108147604	+	271.743	33.6627	30.0644	30.1937	0.00671776	0.0308725	1.19027	0.251285	1.19027	31.8605	26.7675	1.05739	1.33984
FABP5P7	11	59781318	59781723	-	295.4	42.1955	32.5829	32.8222	0.0454435	0.129291	1.19023	0.251237	1.19023	35.5297	29.8512	1.00883	1.40423
AC078846.1	7	129604548	129611631	-	24.3249	4.59146	2.60543	2.70276	0.437433	0.622799	1.19011	0.251094	1.19011	2.56498	2.15525	-1.26653	1.79386
SERPINB1	6	2832332	2841960	-	689.59	88.2728	76.3498	76.6211	0.000973219	0.00664737	1.19008	0.251063	1.19008	84.9186	71.3552	1.08713	1.30279
ZBTB24	6	109462594	109483220	-	163.984	22.2137	18.0747	18.2204	0.0474028	0.133214	1.18991	0.250852	1.18991	18.9652	15.9384	1.00053	1.41514
LINC01123	2	109987063	109996141	+	42.451	8.28053	4.23545	4.71678	0.336688	0.526833	1.18976	0.250667	1.18976	4.10121	3.4471	-1.46758	2.0774
COQ8A	1	226897536	226987546	+	239.97	33.9309	26.4485	26.6634	0.0475935	0.133645	1.18963	0.250508	1.18963	29.5349	24.827	-1.0015	1.41734
AC073073.2	7	105571083	105573661	+	10.292	1.85991	1.05888	1.14355	0.38786	0.575977	1.1894	0.250238	1.1894	1.13028	0.950287	-1.68334	2.38139
NPIPA9	16	18358086	18379332	-	104.58	16.4417	11.3672	11.62	0.227953	0.405432	1.18925	0.250048	1.18925	11.9253	10.0276	-1.13277	1.60209
MAIP1	2	199955317	200008541	+	200.395	24.6876	22.1515	22.2661	0.0246142	0.0824069	1.18924	0.250034	1.18924	23.9976	20.179	1.02164	1.38433
AL691482.4	1	202011370	202015658	+	12.5374	2.31821	1.30177	1.39304	0.396057	0.583744	1.18898	0.249719	1.18898	1.24576	1.04776	-1.48621	2.101
CRLF3	17	30769388	30824693	-	106.987	14.1347	11.8082	11.8875	0.0707469	0.178935	1.18886	0.249575	1.18886	12.6669	10.6547	-1.02187	1.44429
AC013470.3	7	12471352	12472546	+	14.1122	2.07714	1.5094	1.56803	0.376269	0.565486	1.18877	0.249468	1.18877	1.59044	1.33789	-1.4282	2.01829
ZRANB3	2	135136916	135531219	-	69.77	9.72941	7.67768	7.75223	0.166693	0.327772	1.18873	0.249424	1.18873	8.24284	6.93414	-1.07605	1.52054
NUP107	12	68686951	68745810	+	542.674	67.665	60.0657	60.2971	0.00129574	0.00839679	1.18867	0.249344	1.18867	63.602	53.507	1.08337	1.3042
SLC37A3	7	140293693	140404434	-	220.724	28.0868	24.3817	24.5249	0.0345002	0.105994	1.18864	0.249306	1.18864	26.5854	22.3663	1.01392	1.39345
RFX3	9	3218297	3526005	-	58.0005	8.41707	6.31459	6.4445	0.142292	0.293155	1.18853	0.249184	1.18853	7.73859	6.51103	-1.0826	1.5293
RPS6KA1	1	26529761	26575031	+	284.419	37.8561	31.4178	31.6021	0.0139211	0.0538479	1.1884	0.249021	1.1884	35.616	29.9697	1.04167	1.3558
BEND3P3	10	79682997	79685437	+	35.8389	5.72627	3.89928	3.9821	0.248136	0.428401	1.18835	0.248962	1.18835	3.97916	3.34847	-1.17888	1.66478
TGIF1	18	3411608	3459979	+	604.981	76.6717	66.988	67.2201	0.00249774	0.0141604	1.18822	0.2488	1.18822	72.9237	61.3723	1.0754	1.31287
PRAME	22	22547701	22559362	-	815.249	98.965	90.2466	90.5832	0.000872493	0.00610235	1.18813	0.248692	1.18813	95.963	80.7681	1.08732	1.29829
AC005336.1	19	15910582	15911825	-	65.4264	8.09899	7.2339	7.26959	0.0923549	0.21697	1.188	0.248533	1.188	7.61841	6.41281	-1.0338	1.45905
FBXL12	19	9810267	9827817	-	89.8871	11.3963	9.90571	9.98746	0.0940938	0.220155	1.18796	0.248484	1.18796	10.4794	8.82133	-1.04078	1.4688
ADAT3	19	1905399	1913448	+	110.541	14.0435	12.1582	12.2823	0.0997629	0.229823	1.18782	0.248318	1.18782	13.4889	11.356	-1.05463	1.488
SNAI1	20	49982980	49988887	+	60.4328	8.78303	6.61433	6.71475	0.335549	0.525452	1.18768	0.248141	1.18768	7.11743	5.99274	-1.13381	1.59932
NAPRT	8	143574785	143578650	-	135.642	17.2725	15.0141	15.0714	0.02974	0.0950911	1.18759	0.248036	1.18759	16.1435	13.5935	1.01931	1.38365
AC108488.3	2	3568505	3575101	-	66.5537	8.461	7.33548	7.39486	0.138279	0.287775	1.18752	0.247952	1.18752	7.87337	6.63009	-1.06903	1.50755
HIVEP2	6	142751469	142956699	-	158.445	20.5854	17.4966	17.605	0.0540793	0.146696	1.18721	0.247581	1.18721	19.3606	16.3076	-1.00105	1.41096
CCDC59	12	82223681	82358806	-	161.622	19.6259	17.896	17.958	0.0181064	0.065323	1.18661	0.246848	1.18661	19.1794	16.1631	1.03328	1.36269
CCDC73	11	32602246	32794659	-	13.6364	1.9157	1.49262	1.51516	0.421163	0.607534	1.18614	0.24627	1.18614	1.6375	1.38053	-1.33801	1.88247
SUCLG2P2	12	94548241	94549537	+	79.1092	10.9247	8.71534	8.78991	0.130958	0.27777	1.1861	0.24623	1.1861	9.45776	7.9738	-1.06296	1.49542
MRPL44	2	223957463	223967715	+	342.01	43.092	37.8823	38.0012	0.00416655	0.0211209	1.18603	0.246143	1.18603	41.4484	34.9472	1.06582	1.3198
SAMD8	10	75099586	75182124	+	298.311	38.1061	33.0194	33.1456	0.00800325	0.0351999	1.18588	0.245955	1.18588	36.4746	30.7575	1.05234	1.33636
MELK	9	36572862	36677684	+	501.499	60.63	55.4696	55.7221	0.00116768	0.00770552	1.18584	0.245904	1.18584	57.8782	48.808	1.08312	1.29829
GGT1	22	24556007	24629006	+	2318.17	318.989	255.501	257.575	0.0052115	0.0252848	1.18579	0.245843	1.18579	295.659	249.336	1.06198	1.32402
HECTD2	10	91409280	91514830	+	62.9515	8.28015	6.90972	6.99461	0.158812	0.316302	1.1857	0.245738	1.1857	7.47053	6.30053	-1.10688	1.55614
DESI1	22	41598028	41621044	-	654.13	82.0796	72.4713	72.6811	0.000485004	0.00382705	1.18541	0.245389	1.18541	80.2272	67.6787	1.09272	1.28597
CD55	1	207321532	207386805	+	127.432	16.4858	14.0793	14.1592	0.0471092	0.132674	1.18495	0.244825	1.18495	15.7265	13.2719	-1.00333	1.40877
CLMN	14	95181940	95319909	-	754.503	93.3184	83.602	83.8336	0.000556311	0.00427378	1.18474	0.244576	1.18474	91.598	77.3146	1.09107	1.28647
IL11RA	9	34650702	34661903	+	31.7626	4.09971	3.45414	3.52918	0.252113	0.432806	1.18473	0.24456	1.18473	3.78004	3.19063	-1.24653	1.74961
C9orf72	9	27535640	27573867	-	24.9474	4.37282	2.69046	2.77194	0.361363	0.551567	1.18469	0.244505	1.18469	2.6245	2.21536	-1.22941	1.72545
GPANK1	6	31661228	31666284	-	72.505	10.2291	7.99406	8.05612	0.108593	0.243231	1.18451	0.244292	1.18451	8.2988	7.0061	-1.04386	1.4646
ANKZF1	2	219229783	219236680	+	179.487	23.7872	19.7964	19.943	0.0307329	0.0972486	1.18445	0.244214	1.18445	22.7355	19.195	1.01696	1.37952
ZNF195	11	3339261	3379223	-	201.201	26.888	22.2329	22.3556	0.0350769	0.107262	1.18444	0.244203	1.18444	23.7393	20.0427	1.01625	1.38046
HMGA2	12	65824131	65966296	+	180.604	27.8973	19.5112	20.0671	0.213782	0.388512	1.18443	0.244187	1.18443	19.2526	16.2548	-1.08484	1.52188
NAA25	12	112026689	112108797	-	474.039	65.3498	52.4124	52.671	0.00402977	0.0205727	1.18437	0.244124	1.18437	59.3034	50.0715	1.06673	1.31499
MRPL48	11	73787872	73865134	+	131.584	16.1936	14.5641	14.6205	0.0305922	0.0969529	1.18431	0.24405	1.18431	15.4707	13.0631	1.01787	1.37798
ZNF618	9	113876282	114056592	+	618.318	77.2166	68.4932	68.702	0.00117155	0.00772397	1.18398	0.24365	1.18398	73.4851	62.066	1.08273	1.29471
COL6A2	21	46098112	46132849	+	108.352	16.4712	11.4918	12.0391	0.0728202	0.183147	1.18382	0.243456	1.18382	15.4751	13.0721	-1.02003	1.42951
PLEKHG2	19	39412669	39428416	+	1185.42	151.249	131.315	131.713	0.000293484	0.00258662	1.18379	0.243413	1.18379	145.495	122.906	1.09685	1.27762
RSPRY1	16	57186137	57240470	+	460.306	58.8777	50.9434	51.1451	0.00300883	0.0163699	1.18378	0.243402	1.18378	56.9344	48.0954	1.06862	1.31135
RPRD1B	20	38033725	38127781	+	310.504	40.8218	34.3164	34.5005	0.0106575	0.0438447	1.1837	0.2433	1.1837	38.8284	32.8026	1.04696	1.33829
ZNF169	9	94259298	94301830	+	16.7211	2.56179	1.8037	1.8579	0.517006	0.690013	1.18368	0.243274	1.18368	2.08479	1.76129	-1.37307	1.92379
RPL36A	X	101390824	101396156	+	103.324	13.2461	11.416	11.4804	0.0751919	0.187416	1.18354	0.243108	1.18354	12.1468	10.2631	-1.01806	1.42606
BTBD1	15	83016423	83067253	-	910.611	116.621	100.772	101.179	0.00133264	0.00860433	1.18341	0.242955	1.18341	112.858	95.3668	1.08083	1.29574
LIMD2	17	63695888	63701173	-	34.5214	4.40973	3.80734	3.83571	0.228839	0.406216	1.18315	0.242627	1.18315	4.31218	3.64467	-1.12602	1.57624
SRSF2	17	76734115	76737334	-	3204.14	428.862	353.122	356.015	0.0297307	0.0950826	1.18314	0.242623	1.18314	374.42	316.463	1.01971	1.37276
PITRM1	10	3137728	3172842	-	1176.9	156.442	130.105	130.766	0.00161783	0.0100017	1.18305	0.242507	1.18305	147.398	124.592	1.07762	1.29879
SETP14	3	155987304	155988177	+	166.708	20.8255	18.449	18.5232	0.0297861	0.0951957	1.18298	0.242421	1.18298	19.9755	16.8858	1.01991	1.37212
SMAD1	4	145481194	145559177	+	106.632	13.5556	11.7894	11.848	0.0567189	0.15236	1.18291	0.242338	1.18291	12.4922	10.5606	-1.00745	1.4097
MRPL45P2	17	47450568	47492493	-	13.1111	1.91646	1.43786	1.45679	0.440477	0.625475	1.18284	0.242252	1.18284	1.68625	1.4256	-1.31369	1.83799
PSMG3-AS1	7	1570073	1589627	+	106.798	13.7818	11.6887	11.8665	0.157118	0.313827	1.1828	0.242206	1.1828	12.7645	10.7918	-1.10655	1.54808
AC009690.2	15	72278867	72351795	+	31.9456	4.39616	3.49264	3.54951	0.251367	0.431902	1.1828	0.242201	1.1828	3.69673	3.12542	-1.19506	1.6719
ZNF557	19	7069703	7087969	+	57.6486	7.47885	6.38077	6.4054	0.107485	0.241685	1.18271	0.242102	1.18271	7.16725	6.06	-1.04231	1.458
AIDA	1	222668013	222713211	-	594.233	75.6546	65.7938	66.0258	0.00244667	0.0139591	1.18263	0.242004	1.18263	72.7052	61.4773	1.0716	1.30518
SH3BP5-AS1	3	15254184	15264516	+	25.7682	3.58543	2.80569	2.86314	0.287319	0.473787	1.18261	0.24198	1.18261	3.22248	2.72488	-1.25568	1.75616
PPP3CB-AS1	10	73495525	73520071	+	22.9919	3.0627	2.5173	2.55466	0.301132	0.488987	1.18256	0.241914	1.18256	2.68882	2.27373	-1.24014	1.73428
GINS1	20	25407673	25452629	+	711.188	88.9922	78.4424	79.0209	0.0034263	0.0181498	1.18243	0.241758	1.18243	80.2831	67.8966	1.06772	1.30947
SMG1P3	16	21446683	21520445	-	118.361	15.9584	12.9929	13.1512	0.174189	0.337842	1.18241	0.241732	1.18241	14.443	12.2149	-1.07728	1.50614
NOP58	2	202265736	202303662	+	912.029	115.296	100.676	101.337	0.0158273	0.0590736	1.18215	0.241408	1.18215	106.772	90.3209	1.03326	1.35249
LTB4R2	14	24305734	24312054	+	69.573	10.6968	7.5877	7.73034	0.188591	0.356403	1.1821	0.241351	1.1821	7.66107	6.4809	-1.10379	1.54239
EBLN3P	9	37079645	37090929	+	491.34	62.6792	54.2351	54.5933	0.0245696	0.082315	1.18192	0.241127	1.18192	59.9918	50.7581	1.0172	1.3733
TTLL1	22	43039516	43089420	-	14.6367	2.35253	1.55505	1.6263	0.480789	0.659983	1.18174	0.240915	1.18174	1.89459	1.60322	-1.46349	2.04378
BNIP3	10	131966455	131982014	-	439.731	58.708	48.6305	48.859	0.00442098	0.0221372	1.18131	0.240389	1.18131	54.8938	46.4685	1.06358	1.31208
STX18-AS1	4	4542131	4787360	+	18.0201	2.78982	1.93233	2.00224	0.368164	0.558269	1.1812	0.240256	1.1812	1.99227	1.68665	-1.37919	1.9243
ENY2	8	109334324	109345955	+	311.266	39.7751	34.4511	34.5851	0.010754	0.0441404	1.18119	0.240243	1.18119	37.7072	31.9231	1.04416	1.33621
POLR1C	6	43509702	43562420	+	189.916	24.7902	20.9942	21.1018	0.0360888	0.109454	1.18119	0.240242	1.18119	22.6057	19.1381	1.01102	1.38
TBCA	5	77691166	77868781	-	575.618	70.5381	63.7801	63.9576	0.00125638	0.00818186	1.18113	0.240166	1.18113	69.6253	58.9482	1.07976	1.29202
HSPB11	1	53916574	53945930	-	56.278	7.65692	6.18088	6.25311	0.248943	0.429073	1.18096	0.239962	1.18096	6.61887	5.60464	-1.11791	1.55912
TVP23C	17	15502264	15563596	-	26.1347	4.09202	2.85758	2.90386	0.372684	0.562154	1.18071	0.239652	1.18071	3.29959	2.79458	-1.21851	1.69869
AC112777.1	12	20551590	20553013	+	398.021	60.9594	43.7184	44.2246	0.114923	0.253335	1.18054	0.239452	1.18054	48.5309	41.1089	-1.03674	1.44489
HINT1	5	131159027	131171736	-	1546.49	197.799	171.19	171.833	0.000216392	0.0020252	1.18054	0.239442	1.18054	192.436	163.008	1.09772	1.26961
PDIA6	2	10783391	10837978	-	2590.56	316.279	287.143	287.841	9.35606e-05	0.00102212	1.18047	0.239364	1.18047	311.054	263.5	1.10431	1.26189
GNB1L	22	19783223	19854940	-	117.105	16.541	12.9453	13.0117	0.0777131	0.192181	1.18038	0.239249	1.18038	14.0731	11.9226	-1.01352	1.41213
PARP4P2	13	19349137	19407963	+	11.1928	2.02613	1.19963	1.24365	0.671232	0.802955	1.17987	0.238627	1.17987	1.35295	1.1467	-1.50108	2.08964
DNAAF2	14	49625174	49635231	-	156.602	22.2583	17.229	17.4002	0.128776	0.274624	1.17982	0.238563	1.17982	18.7566	15.8979	-1.04779	1.45849
C18orf25	18	46173553	46266993	+	238.471	32.8532	26.349	26.4968	0.022117	0.076049	1.1798	0.238547	1.1798	29.7438	25.2108	1.02884	1.35292
SLC44A1	9	105244622	105439172	+	472.336	59.474	52.2768	52.4818	0.0067743	0.0310528	1.17959	0.238285	1.17959	57.564	48.8	1.05393	1.32023
ZBTB12	6	31899613	31902087	-	84.9582	11.1608	9.3916	9.43979	0.077028	0.190922	1.17943	0.238085	1.17943	9.84314	8.3457	-1.02261	1.42249
TUBBP2	13	41384773	41385184	-	17.3916	2.49302	1.89655	1.9324	0.420886	0.607377	1.17902	0.23759	1.17902	2.14733	1.82128	-1.31639	1.8299
MIER1	1	66924895	66988620	+	190.975	25.0339	21.0872	21.2195	0.0488907	0.13617	1.17895	0.2375	1.17895	23.4484	19.8892	-1.00098	1.39128
RIMKLB	12	8681600	8783096	+	185.479	23.4638	20.4847	20.6088	0.0492383	0.13687	1.17877	0.237283	1.17877	22.6423	19.2084	-1.00143	1.39149
ACSL3	2	222860942	222944640	+	1135.23	137.206	125.669	126.137	0.00170854	0.0104573	1.17845	0.236896	1.17845	133.625	113.39	1.07364	1.2935
LDHAP5	10	118932674	118933296	-	127.055	17.1104	13.9885	14.1172	0.0635699	0.165422	1.17831	0.236723	1.17831	14.3524	12.1804	-1.01776	1.41308
EEPD1	7	36153254	36301539	+	197.971	26.4295	21.7082	21.9967	0.017342	0.0633609	1.17814	0.236512	1.17814	26.0741	22.1316	1.03144	1.3457
U2AF1	21	43092956	43107588	-	192.779	26.9737	20.9514	21.4199	0.168632	0.330536	1.17814	0.236507	1.17814	22.1551	18.8052	-1.12872	1.56667
IPO11	5	62403972	62628583	+	320.714	39.4261	35.5157	35.6348	0.00708706	0.0321938	1.17801	0.236354	1.17801	37.9248	32.1939	1.05346	1.31729
POLR3B	12	106357748	106510199	+	87.194	11.3394	9.57778	9.68823	0.133844	0.281765	1.17794	0.236268	1.17794	10.9735	9.31585	-1.07334	1.48932
GOLGA8B	15	34525207	34588504	-	231.918	30.1992	25.5169	25.7687	0.0815397	0.198542	1.17758	0.235821	1.17758	28.5353	24.2323	-1.03194	1.43097
FAM241A	4	112145454	112195257	+	55.4469	8.81434	6.05482	6.16076	0.331959	0.521992	1.17752	0.23575	1.17752	6.84367	5.81194	-1.15814	1.60582
ZEB1-AS1	10	31206278	31320448	-	25.0044	4.26351	2.71382	2.77827	0.429678	0.615721	1.17743	0.235646	1.17743	2.86272	2.43132	-1.27222	1.76374
ILRUN	6	34587288	34696860	-	847.234	104.301	93.8252	94.1371	0.00107063	0.00717049	1.17732	0.235505	1.17732	99.3856	84.4169	1.08047	1.28285
AC015849.6	17	35861093	35861567	-	57.5796	7.25015	6.37168	6.39773	0.133163	0.280706	1.177	0.235116	1.177	6.77614	5.75712	-1.05693	1.4642
TICAM1	19	4815932	4831705	-	206.637	25.2526	22.8643	22.9597	0.0178237	0.0645771	1.17687	0.234961	1.17687	24.0625	20.4461	1.03308	1.34069
MOB1A	2	74152528	74178899	-	1915.93	236.773	212.196	212.881	0.000973553	0.00664737	1.17669	0.234737	1.17669	233.187	198.172	1.08013	1.28189
FAM32A	19	16185380	16192047	+	512.243	65.5938	56.7221	56.9159	0.00238557	0.0136811	1.17668	0.234723	1.17668	63.074	53.6033	1.07042	1.29349
SNRPF	12	95858928	95903829	+	439.069	57.1862	48.4416	48.7855	0.0299857	0.0957063	1.17665	0.234682	1.17665	50.7587	43.1384	1.01916	1.35847
SNRK	3	43286512	43424765	+	115.373	15.4085	12.7514	12.8192	0.0745586	0.186377	1.17658	0.2346	1.17658	14.0692	11.9577	-1.019	1.41064
ICE1	5	5420664	5490221	+	877.672	111.558	97.2133	97.5192	0.00206304	0.0122016	1.17649	0.234489	1.17649	106.014	90.1102	1.0719	1.29128
SPG11	15	44562696	44663679	-	296.429	41.4324	32.6565	32.9366	0.0743447	0.185976	1.17649	0.234484	1.17649	36.4553	30.9866	-1.01546	1.40552
MFSD8	4	127917799	127966035	-	67.6899	9.18282	7.47422	7.5211	0.135532	0.283752	1.17647	0.234465	1.17647	7.91174	6.72498	-1.06033	1.46759
SMG1P2	16	29527568	29594967	-	33.7794	5.92028	3.60188	3.75327	0.550489	0.716044	1.17613	0.234044	1.17613	3.71477	3.15847	-1.32465	1.83235
WDR36	5	111091716	111130503	+	387.238	47.6255	42.8874	43.0264	0.00621918	0.029008	1.17601	0.233906	1.17601	46.7972	39.7931	1.05456	1.31146
NOB1	16	69741871	69754927	-	883.999	119.408	97.5212	98.2221	0.0247885	0.0827844	1.17596	0.233833	1.17596	102.472	87.1392	1.02341	1.35124
PPP2R2A	8	26291508	26372681	+	483.449	59.1413	53.4619	53.7166	0.00290343	0.0159323	1.1758	0.233647	1.1758	55.5078	47.2084	1.06596	1.29696
RPAIN	17	5419641	5432877	+	148.887	21.4761	16.357	16.543	0.0577209	0.154302	1.1756	0.233399	1.1756	16.4329	13.9783	-1.00655	1.3911
RHOV	15	40872214	40874235	-	33.7557	6.23123	3.6087	3.75063	0.258364	0.440187	1.17551	0.233281	1.17551	3.30172	2.80876	-1.14795	1.58625
ZNF155	19	43967862	43998327	+	18.7899	3.22745	2.0003	2.08776	0.670277	0.802676	1.17546	0.233225	1.17546	2.21502	1.88439	-1.44135	1.99153
TMEM87A	15	42210447	42273585	-	190.255	24.0353	21.0532	21.1394	0.0300256	0.0957912	1.17546	0.233222	1.17546	23.1495	19.694	1.01823	1.35697
MSX1	4	4859665	4863937	+	97.8135	14.2724	10.7283	10.8682	0.106708	0.24039	1.17538	0.233128	1.17538	12.6843	10.7917	-1.04075	1.43781
TRPA1	8	72019917	72075585	-	22.4782	3.73463	2.30943	2.49758	0.395219	0.583277	1.17536	0.233106	1.17536	3.25352	2.7681	-1.33111	1.8389
TMEM216	11	61392360	61398864	+	53.9519	7.56789	5.95039	5.99466	0.198571	0.369393	1.17518	0.232881	1.17518	6.51541	5.54418	-1.09649	1.5143
GCNT3	15	59594875	59640240	+	825.163	104.846	91.3518	91.6848	0.0015329	0.00959969	1.17514	0.232831	1.17514	101.847	86.6678	1.07547	1.28404
ZCCHC4	4	25312774	25370384	+	49.0678	6.40432	5.41912	5.45198	0.175836	0.340302	1.17507	0.232741	1.17507	6.06947	5.16522	-1.08733	1.50137
ORC5	7	104126341	104208048	-	207.087	25.5525	22.9127	23.0097	0.0144293	0.0552725	1.175	0.232667	1.175	23.887	20.3293	1.03873	1.32915
AC016026.1	22	17787652	17811498	-	53.2314	7.53206	5.81933	5.9146	0.356716	0.547264	1.17481	0.232426	1.17481	6.17835	5.25903	-1.16105	1.60245
NUP62	19	49906825	49929764	-	2270.65	285.521	251.487	252.295	0.0014381	0.00912935	1.17451	0.232055	1.17451	271.165	230.876	1.07504	1.28317
SLC30A1	1	211571568	211579162	-	902.445	114.051	99.8992	100.272	0.00308989	0.0167066	1.1745	0.232046	1.1745	110.497	94.0802	1.06557	1.29456
HNRNPC	14	21209136	21269495	-	3788.91	506.636	419.113	420.99	0.00712031	0.0322784	1.17428	0.231776	1.17428	448.327	381.789	1.05424	1.30798
RAB30-DT	11	83072052	83107790	+	30.8707	4.18468	3.39333	3.43008	0.32812	0.517371	1.17425	0.231735	1.17425	3.51076	2.9898	-1.16741	1.60969
DUT	15	48331011	48343374	+	728.469	87.9198	80.644	80.9411	0.00296076	0.0161482	1.17416	0.231629	1.17416	85.4357	72.7632	1.06528	1.29417
SRXN1	20	646615	653201	-	5401.72	674.275	597.417	600.192	0.000869345	0.00608626	1.17404	0.231484	1.17404	621.199	529.111	1.08109	1.27498
AKAP7	6	131135467	131283536	+	29.4373	4.27367	3.24102	3.27081	0.332845	0.523043	1.17401	0.231443	1.17401	3.59685	3.06374	-1.1779	1.6235
SNX10	7	26291862	26374384	+	64.2891	8.98436	6.8798	7.14323	0.25878	0.440635	1.17358	0.230911	1.17358	8.83254	7.52618	-1.14132	1.57191
NLK	17	28041737	28196382	+	114.071	15.0646	12.5405	12.6746	0.138234	0.287765	1.17357	0.230906	1.17357	13.9576	11.8932	-1.07059	1.47449
SEMA4B	15	90160604	90229680	+	1239.48	163.897	136.918	137.72	0.00175318	0.0106722	1.17355	0.230876	1.17355	156.44	133.305	1.07291	1.28363
ARL2-SNX15	11	65014182	65040571	+	18.1604	3.31186	1.91756	2.01782	0.591649	0.745442	1.17342	0.230725	1.17342	2.06235	1.75755	-1.48095	2.03915
SLC6A6	3	14402576	14489350	+	2059.57	267.786	228.027	228.841	0.00112427	0.00746495	1.17333	0.230607	1.17333	253.068	215.684	1.07778	1.27735
KRT8P37	10	8513687	8515107	-	72.2301	9.9372	7.91483	8.02557	0.19564	0.36552	1.17322	0.230475	1.17322	7.9833	6.8046	-1.08055	1.48732
CDC25A	3	48157146	48188418	-	198.5	26.977	21.8473	22.0555	0.0801593	0.196245	1.1732	0.230444	1.1732	22.5471	19.2185	-1.01517	1.39726
CLK2P1	7	23585062	23586356	-	9.9258	1.63987	1.07161	1.10287	0.578212	0.736205	1.17316	0.230399	1.17316	1.13105	0.964104	-1.50785	2.07526
ETS1	11	128458761	128587559	-	304.274	52.7075	32.5302	33.8082	0.329475	0.51903	1.17315	0.230384	1.17315	40.4489	34.4789	-1.16279	1.60031
IQSEC2	X	53225828	53321351	-	421.915	56.7841	46.2343	46.8795	0.00494313	0.0241952	1.17306	0.230283	1.17306	55.6952	47.4783	1.05774	1.30096
TDP2	6	24649979	24666931	-	453.735	55.8247	50.2358	50.415	0.00336103	0.0178497	1.17304	0.230249	1.17304	52.8126	45.0221	1.06424	1.29295
TRIM27	6	28903002	28923989	-	626.004	79.9609	69.3179	69.556	0.00401231	0.0205132	1.17299	0.230195	1.17299	76.1691	64.9356	1.06029	1.29768
SURF2	9	133356550	133361159	+	167.553	21.6829	18.5005	18.6169	0.0671033	0.172356	1.17296	0.230157	1.17296	20.2514	17.2652	-1.0181	1.40074
RNASET2	6	166922113	166957192	-	114.789	14.5668	12.7049	12.7543	0.0540689	0.146696	1.17292	0.230102	1.17292	14.0625	11.9893	-1.00519	1.38288
RAB5IF	20	36605779	36612558	+	1508.05	193.467	166.915	167.561	0.00236903	0.0135971	1.17291	0.230089	1.17291	185.166	157.869	1.06784	1.28832
AC016876.3	17	7572826	7582025	+	179.578	25.408	19.6577	19.9531	0.142395	0.293282	1.17287	0.23004	1.17287	22.6207	19.2867	-1.07316	1.47626
FAM114A2	5	153990148	154038937	-	75.32	9.2595	8.33683	8.36889	0.104139	0.236381	1.17282	0.229984	1.17282	9.0423	7.70987	-1.03969	1.4301
C1QL1	17	44959693	44968304	-	412.05	65.2795	44.2126	45.7834	0.0179103	0.0647782	1.17281	0.229967	1.17281	40.4365	34.4784	1.0304	1.3349
AP002784.2	11	94188449	94188998	-	124.208	16.115	13.7086	13.8009	0.0625334	0.163544	1.17253	0.229631	1.17253	15.585	13.2917	-1.01309	1.39284
C3orf38	3	88149959	88168730	+	149.354	19.8544	16.4996	16.5949	0.0558247	0.150397	1.17239	0.229456	1.17239	18.4339	15.7233	-1.00747	1.38477
BSCL2	11	62690275	62709846	-	232.555	30.75	25.716	25.8395	0.029563	0.0946516	1.17239	0.229448	1.17239	28.7161	24.4937	1.0224	1.34438
TBCK	4	106041599	106316684	-	96.6784	12.1204	10.6997	10.742	0.0781811	0.192815	1.17225	0.229285	1.17225	11.3801	9.70787	-1.01929	1.40068
AAMP	2	218264123	218270258	-	1088.34	139.887	120.436	120.927	0.00542004	0.0259809	1.17201	0.228986	1.17201	132.867	113.367	1.05561	1.30125
H3C6	6	26224199	26227474	+	15.5645	2.51085	1.63785	1.72939	0.548247	0.714615	1.17191	0.228856	1.17191	1.87072	1.5963	-1.55791	2.13957
TMEM50A	1	25338317	25362362	+	421.221	53.8184	46.5388	46.8023	0.0129517	0.0509346	1.17188	0.228829	1.17188	52.4728	44.7764	1.03638	1.3251
TMEM68	8	55696424	55773408	-	86.104	11.8628	9.46176	9.56711	0.162007	0.321064	1.17185	0.228785	1.17185	10.3295	8.81471	-1.09449	1.50298
TSTA3	8	143612618	143618049	-	738.051	95.4433	81.7242	82.0057	0.00273992	0.0152152	1.17171	0.228617	1.17171	90.3938	77.1468	1.06616	1.28771
C12orf43	12	121000486	121016503	-	287.096	36.207	31.7908	31.8995	0.0122867	0.048922	1.17142	0.228259	1.17142	34.935	29.8227	1.03998	1.31948
ZBTB11	3	101648889	101677133	-	280.024	34.5646	30.9871	31.1137	0.0221543	0.0761	1.17134	0.228156	1.17134	33.8769	28.9216	1.02627	1.3369
FMNL2	2	152335174	152649827	+	406.018	55.0225	44.9081	45.1131	0.0210293	0.0731317	1.17134	0.228155	1.17134	49.1704	41.978	1.02937	1.33288
TMSB10	2	84905656	84906672	+	9639.29	1194.2	1067.31	1071.03	0.00070032	0.0051148	1.17126	0.228056	1.17126	1187.3	1013.7	1.08186	1.26803
AL137191.1	14	63122888	63178191	-	29.3607	4.18468	3.23011	3.2623	0.303334	0.491229	1.17104	0.227796	1.17104	3.44726	2.94375	-1.18491	1.62491
PSMG2	18	12658043	12725741	+	228.751	27.7212	25.3481	25.4167	0.0116503	0.0470268	1.17101	0.227748	1.17101	27.0717	23.1183	1.04116	1.31705
SLC37A1	21	42496008	42581441	+	104.402	13.9562	11.5476	11.6002	0.0742369	0.185767	1.17088	0.227596	1.17088	12.8704	10.992	-1.01666	1.39381
ATF1	12	50763710	50821163	+	123.77	15.4617	13.6946	13.7522	0.0569218	0.152734	1.17066	0.227321	1.17066	14.4909	12.3784	-1.00599	1.37865
C4orf33	4	129093317	129116641	+	37.0975	6.82567	3.92961	4.12194	0.3178	0.506435	1.1705	0.227125	1.1705	3.8089	3.25408	-1.29369	1.77245
GTF2H4	6	30908207	30914107	+	127.735	17.0141	14.0814	14.1928	0.131359	0.278293	1.17048	0.227097	1.17048	15.1441	12.9384	-1.048	1.43577
RRP7A	22	42508344	42519797	-	1179.99	146.774	130.56	131.11	0.00801284	0.0352241	1.17023	0.226787	1.17023	140.308	119.898	1.04692	1.30806
KSR1	17	27456470	27626439	+	555.151	69.7807	61.3907	61.6834	0.0156808	0.058756	1.17018	0.226733	1.17018	65.3166	55.8175	1.03318	1.32535
GORAB	1	170532129	170553447	+	42.7433	5.75701	4.67904	4.74925	0.280875	0.4663	1.17015	0.226691	1.17015	5.05302	4.31827	-1.18161	1.61792
ANKRD10	13	110878540	110915070	-	177.995	22.2227	19.6433	19.7772	0.0811713	0.197953	1.17011	0.226639	1.17011	21.1702	18.0926	-1.02488	1.40321
TRMT5	14	60971441	60981171	-	202.452	25.617	22.4243	22.4947	0.013931	0.0538572	1.16992	0.226404	1.16992	24.9317	21.3107	1.03736	1.31941
PLOD2	3	146069440	146163654	-	1867.74	246.194	204.756	207.527	0.00262186	0.0146974	1.16986	0.226339	1.16986	245.444	209.805	1.06485	1.28524
PVRIG2P	7	100352360	100353693	+	26.9529	5.6644	2.27842	2.99477	0.538497	0.70749	1.16982	0.226289	1.16982	2.36916	2.02523	-2.49137	3.4094
SNHG1	11	62851984	62855954	-	360.174	51.8528	39.5676	40.0193	0.0462303	0.130703	1.16976	0.226209	1.16976	39.9465	34.1494	1.00419	1.36263
NOC2LP1	2	130229379	130232107	+	39.9963	5.551	4.33235	4.44404	0.24543	0.425005	1.16975	0.226198	1.16975	4.44846	3.80292	-1.22518	1.67643
PNPT1	2	55634061	55693864	-	497.658	69.3078	54.4804	55.2953	0.0168859	0.0622168	1.16941	0.225786	1.16941	53.2238	45.5132	1.03724	1.31843
FAM177A1	14	35044907	35113131	+	443.122	56.9586	48.9011	49.2358	0.0439515	0.126105	1.16923	0.225565	1.16923	53.0158	45.3423	-1.00364	1.37209
RTL6	22	44492583	44498234	-	672.784	86.2728	74.3209	74.7538	0.00134405	0.00865467	1.16899	0.225268	1.16899	85.2031	72.8858	1.07397	1.27243
IGFL2-AS1	19	46189029	46203161	-	19.6124	2.51085	2.16503	2.17916	0.351205	0.541818	1.16877	0.224992	1.16877	2.23193	1.90964	-1.21834	1.66428
NOLC1	10	102152176	102163872	+	2969.09	388.271	328.472	329.899	0.0092191	0.039242	1.16875	0.224961	1.16875	353.248	302.245	1.04639	1.3054
GFM1	3	158644527	158695582	+	586.622	74.3165	64.9845	65.1803	0.00433687	0.0218329	1.16872	0.224924	1.16872	70.8439	60.6169	1.05894	1.28988
NRDC	1	51789191	51878938	-	1080.85	134.34	119.744	120.095	0.00226967	0.0131783	1.16863	0.224819	1.16863	129.867	111.127	1.06762	1.27919
PRPF4	9	113275642	113294010	+	437.396	54.2234	48.38	48.5996	0.00839092	0.0364622	1.16861	0.224793	1.16861	50.5371	43.2455	1.04539	1.30635
CWF19L2	11	107326345	107457845	-	56.4007	7.21009	6.21969	6.26674	0.161183	0.319739	1.16853	0.2247	1.16853	6.34286	5.42805	-1.07163	1.46328
CAB39L	13	49308650	49444065	-	22.66	3.75081	2.46043	2.51777	0.54947	0.715267	1.16828	0.224388	1.16828	2.66401	2.28028	-1.30512	1.78133
NSMCE4A	10	121957091	121975218	-	454.544	60.4972	50.2439	50.5049	0.00777145	0.0345008	1.16802	0.224063	1.16802	51.9169	44.4487	1.04945	1.29998
MASTL	10	27154824	27187954	+	260.632	34.4936	28.6389	28.9592	0.0231075	0.0784966	1.16774	0.223724	1.16774	28.3922	24.3137	1.02797	1.32653
BRCA2	13	32315086	32400267	+	192.169	28.2693	21.0196	21.3522	0.0964241	0.224292	1.16751	0.223439	1.16751	20.8638	17.8703	-1.03106	1.40543
P2RY6	11	73264505	73298618	+	94.2173	12.3862	10.3473	10.4686	0.158764	0.316294	1.16733	0.223219	1.16733	11.5623	9.90487	-1.09595	1.49342
ACYP2	2	53970838	54305301	+	37.5175	5.85538	4.0895	4.16861	0.436662	0.622268	1.16725	0.223111	1.16725	4.36314	3.73797	-1.21854	1.66022
TFB1M	6	155256134	155314494	-	30.9622	4.34157	3.40665	3.44024	0.341243	0.531299	1.16724	0.223099	1.16724	3.63894	3.11757	-1.18316	1.61199
MAML2	11	95976598	96343196	-	79.4074	12.2866	8.63915	8.82304	0.265509	0.448584	1.16713	0.222971	1.16713	10.4648	8.96627	-1.10039	1.49895
SASS6	1	100083563	100132956	-	70.7887	9.76412	7.80781	7.86541	0.159136	0.316686	1.16698	0.222779	1.16698	8.12129	6.95924	-1.06805	1.45451
MFHAS1	8	8783354	8893631	-	986.836	129.276	108.994	109.648	0.0160198	0.0596681	1.16687	0.222649	1.16687	113.352	97.1412	1.03681	1.31325
DKK3	11	11956207	12009770	-	252.691	39.0957	27.5461	28.0768	0.0458754	0.130191	1.16673	0.222472	1.16673	33.6842	28.8706	1.00738	1.35129
DHX37	12	124946825	124989132	-	1117.95	138.179	123.839	124.217	0.00186986	0.0112725	1.16672	0.222453	1.16672	131.349	112.58	1.06973	1.2725
ZNF461	19	36636618	36666854	-	29.4224	4.9405	3.21379	3.26915	0.430944	0.616997	1.16671	0.22245	1.16671	3.73172	3.19849	-1.21497	1.65384
SAP30L	5	154445997	154461054	+	282.684	35.7627	31.2552	31.4094	0.0353034	0.107748	1.16668	0.222411	1.16668	33.8844	29.0434	1.00817	1.35011
AC127496.7	17	81003335	81005133	+	15.5411	2.37881	1.67397	1.72678	0.408008	0.595252	1.16646	0.222136	1.16646	2.05709	1.76354	-1.36153	1.85253
SNX5P1	4	76344550	76345591	+	15.7663	2.20801	1.72591	1.75181	0.45052	0.634278	1.16645	0.22213	1.16645	1.87913	1.61098	-1.33197	1.8123
CISD2	4	102868974	102892808	+	331.638	43.3658	36.6659	36.8487	0.0338909	0.104592	1.16639	0.222044	1.16639	40.1843	34.452	1.01342	1.34244
RAB10	2	26034084	26137455	+	4759.29	608.992	526.342	528.81	0.0120367	0.0482576	1.16637	0.222026	1.16637	561.974	481.814	1.03962	1.30858
SLC31A1	9	113221544	113264493	+	480.579	57.0701	53.2486	53.3977	0.00379445	0.0196154	1.16633	0.221975	1.16633	56.6747	48.5924	1.05871	1.28489
MTG1	10	133394094	133422521	+	438.146	53.4512	48.5444	48.6829	0.00562058	0.0267457	1.16615	0.221754	1.16615	51.8335	44.4484	1.05341	1.29096
USP25	21	15730025	15880070	+	296.922	37.9403	32.7495	32.9913	0.0497311	0.138029	1.16609	0.221683	1.16609	34.3739	29.4778	-1.00873	1.37164
PRDX6	1	173477330	173488816	+	1183.41	147.571	131.151	131.489	0.000578389	0.00439404	1.16604	0.221623	1.16604	144.21	123.675	1.08145	1.25726
ZUP1	6	116635618	116668795	-	43.2763	6.22134	4.6555	4.80848	0.384727	0.573304	1.16596	0.221517	1.16596	5.29983	4.54547	-1.29652	1.76257
TNS3	7	47275154	47582559	-	6865.4	895.288	758.861	762.823	0.000232502	0.00214248	1.16593	0.22148	1.16593	865.718	742.514	1.08957	1.24763
KRTCAP2P1	2	44996413	44996874	+	178.797	22.6691	19.7824	19.8663	0.0494273	0.137265	1.16583	0.221362	1.16583	21.2529	18.2298	1.00068	1.35824
AC093909.1	4	188738373	188739495	+	24.1294	3.54316	2.62763	2.68104	0.381411	0.570112	1.16531	0.220718	1.16531	2.64334	2.26835	-1.24948	1.69674
KRT18P12	1	214532195	214533468	+	20.4053	3.31451	2.18058	2.26726	0.352094	0.542564	1.16529	0.220687	1.16529	2.20274	1.89029	-1.38507	1.88078
NOC3L	10	94333226	94362960	-	323.968	42.5578	35.7776	35.9965	0.048683	0.135816	1.16521	0.22059	1.16521	39.2953	33.7238	-1.00177	1.36012
GNA13	17	65009289	65056741	-	780.022	98.2162	86.3911	86.6691	0.00133184	0.00860303	1.16516	0.220528	1.16516	96.0657	82.4485	1.07269	1.26561
UNK	17	75784806	75825800	+	359.207	45.3178	39.7763	39.9119	0.0134131	0.0523621	1.16514	0.220497	1.16514	42.5868	36.551	1.03653	1.3097
ZNF830	17	34961540	34963778	+	85.1216	10.7731	9.37418	9.45796	0.134134	0.282014	1.16509	0.220445	1.16509	9.6922	8.31882	-1.06594	1.44695
WDR43	2	28894667	28948220	+	1213.16	160.081	134.263	134.795	0.010146	0.0421982	1.165	0.220331	1.165	145.974	125.299	1.04419	1.29979
WHAMMP3	15	22664359	22686214	+	34.876	4.47419	3.83735	3.87512	0.265765	0.448691	1.16491	0.220216	1.16491	4.0637	3.48843	-1.16995	1.58764
ERP44	9	99979185	100099001	-	193.845	25.617	21.4134	21.5383	0.0499619	0.138528	1.1649	0.220206	1.1649	23.9239	20.5373	-1.0042	1.36269
NSMCE2	8	125091679	125367121	+	107.298	13.7287	11.8283	11.922	0.126628	0.271634	1.16487	0.220172	1.16487	12.8469	11.0286	-1.06266	1.44195
UHRF1	19	4903080	4962155	+	1180.25	160.911	130.434	131.139	0.0278535	0.0904485	1.16462	0.219853	1.16462	140.241	120.418	1.02148	1.3278
LTBP2	14	74498183	74612379	-	362.173	62.946	37.3025	40.2414	0.12629	0.27099	1.16459	0.219819	1.16459	53.1109	45.6049	-1.0543	1.42991
RBPJ	4	26163455	26435132	+	271.354	35.4351	30.0371	30.1504	0.0222856	0.0764458	1.16451	0.219722	1.16451	32.9717	28.3138	1.02476	1.32331
PGAM1	10	97426191	97433445	+	3097.3	382.783	343.183	344.144	0.00117529	0.00773609	1.16449	0.219698	1.16449	374.103	321.259	1.07299	1.26379
CKMT1B	15	43593054	43604902	+	41.8148	6.45742	4.49746	4.64609	0.430255	0.616133	1.16437	0.219547	1.16437	4.28526	3.68033	-1.18522	1.60687
GADD45B	19	2476122	2478260	+	385.211	48.0777	42.6546	42.8012	0.00478532	0.0236209	1.16413	0.219254	1.16413	47.5704	40.8635	1.05553	1.28391
TEF	22	41367333	41399327	+	60.1625	9.33326	6.58192	6.68472	0.353988	0.544773	1.16402	0.219119	1.16402	7.45104	6.40111	-1.1526	1.56171
LEO1	15	51938025	51971779	-	435.225	54.6907	48.2476	48.3584	0.00370306	0.0192481	1.16398	0.219065	1.16398	51.7127	44.4275	1.05991	1.27827
CENPQ	6	49463370	49493108	+	31.3919	4.46365	3.43127	3.48799	0.308814	0.497245	1.16392	0.218994	1.16392	3.48043	2.99026	-1.20066	1.62655
SNRPA1	15	101281510	101295283	-	182.329	24.3982	20.1326	20.2588	0.0584807	0.155898	1.16388	0.218938	1.16388	21.0557	18.091	-1.01123	1.36982
AC103702.2	17	48635923	48647024	-	56.338	7.67597	6.21202	6.25977	0.176745	0.341171	1.16368	0.218691	1.16368	7.12784	6.12527	-1.07778	1.45948
DLEU2	13	49956670	50125721	-	33.2823	4.88699	3.60884	3.69803	0.445237	0.62942	1.16354	0.218522	1.16354	3.59904	3.09318	-1.2202	1.65194
BLZF1	1	169367970	169396541	+	122.229	16.4681	13.5106	13.581	0.0998286	0.229823	1.16348	0.218446	1.16348	14.3938	12.3713	-1.02901	1.39296
GAS5	1	173858559	173868883	-	219.442	28.2213	24.2522	24.3824	0.0530633	0.14487	1.16343	0.21839	1.16343	26.3917	22.6843	-1.00738	1.36356
PTMA	2	231706895	231713542	+	8260.24	1035.43	913.193	917.804	0.0043644	0.021915	1.16336	0.218295	1.16336	947.037	814.055	1.05523	1.28257
FUOM	10	133355158	133358026	-	37.7181	5.07497	4.14222	4.1909	0.340207	0.530318	1.16336	0.218294	1.16336	4.41146	3.79201	-1.17702	1.59298
DLL3	19	39498895	39508482	+	133.302	17.9847	14.6977	14.8113	0.116639	0.256292	1.16333	0.218256	1.16333	16.381	14.0811	-1.04388	1.41271
VRK1	14	96797382	96931723	+	128.624	17.163	14.139	14.2915	0.127929	0.273594	1.16326	0.218178	1.16326	14.2772	12.2734	-1.03708	1.40335
PKMP1	1	114535995	114537841	+	18.9538	2.5936	2.07555	2.10598	0.423624	0.609798	1.16318	0.218078	1.16318	2.38581	2.0511	-1.27818	1.72936
NTMT1	9	129608884	129636132	+	337.146	43.1341	37.221	37.4606	0.0237812	0.0802873	1.16313	0.218012	1.16313	38.2832	32.914	1.02185	1.32394
PTPRA	20	2864184	3039077	+	649.536	83.3336	71.8987	72.1707	0.00721448	0.032582	1.16291	0.217743	1.16291	79.5062	68.3682	1.04828	1.29008
CDC40	6	110180141	110254276	+	113.192	15.2506	12.4844	12.5769	0.134699	0.28266	1.16247	0.217199	1.16247	13.4199	11.5443	-1.05813	1.4299
TMA16P2	1	45846994	45847595	-	10.4927	1.57016	1.1385	1.16585	0.557198	0.720885	1.16222	0.216889	1.16222	1.18537	1.01991	-1.47091	1.98686
ST13P18	X	93287733	93288760	-	39.5296	5.2656	4.31196	4.39218	0.307593	0.496104	1.16215	0.2168	1.16215	5.00205	4.30413	-1.19455	1.61336
EMC2	8	108443601	108489197	+	162.172	22.5038	17.8525	18.0191	0.125919	0.270559	1.16203	0.216652	1.16203	19.3086	16.6162	-1.05927	1.43036
PAPOLG	2	60756253	60802087	+	121.214	15.937	13.4092	13.4682	0.0800179	0.196	1.16194	0.216539	1.16194	14.8488	12.7792	-1.01766	1.37395
AC002056.1	22	50754675	50755435	-	70.6864	9.20684	7.8025	7.85405	0.167885	0.32953	1.16187	0.21645	1.16187	8.38198	7.21421	-1.0814	1.45983
MORN1	1	2321253	2391708	-	65.2563	8.86431	7.17267	7.2507	0.251849	0.432518	1.16178	0.216332	1.16178	7.80915	6.72173	-1.12476	1.51812
WDR3	1	117929720	117966544	+	565.285	72.9171	62.6241	62.8095	0.00715348	0.0323777	1.16175	0.216297	1.16175	67.1682	57.8165	1.04922	1.28634
KLF11	2	10042849	10054837	+	73.7117	10.9511	8.0816	8.19019	0.285313	0.471453	1.16174	0.216287	1.16174	9.01473	7.75968	-1.12837	1.52289
SURF6	9	133328776	133336189	-	419.332	53.8649	46.4152	46.5924	0.0168473	0.0621222	1.16166	0.216185	1.16166	50.6562	43.6068	1.02977	1.31043
E2F5	8	85177154	85217159	+	159.515	21.4533	17.5831	17.7238	0.0565261	0.151969	1.16162	0.216139	1.16162	17.8064	15.3289	-1.00535	1.35658
TBK1	12	64452092	64502115	+	258.779	31.227	28.6322	28.7532	0.0314121	0.0987653	1.1616	0.216111	1.1616	30.7198	26.4461	1.0096	1.33648
GGT2	22	21207973	21227638	-	28.4058	4.01245	3.09266	3.1562	0.312849	0.501561	1.1616	0.216111	1.1616	3.63808	3.13196	-1.23968	1.67272
DENND10P1	X	130494965	130496589	+	135.981	18.1523	14.9576	15.1091	0.153832	0.309583	1.16156	0.21606	1.16156	16.7148	14.39	-1.06619	1.43852
FLOT1	6	30727709	30742733	-	1031.67	129.182	114.298	114.63	0.00311266	0.0168107	1.16151	0.216001	1.16151	124.395	107.098	1.05967	1.27314
HNRNPH2	X	101408222	101414134	+	564.778	72.9167	62.5405	62.7531	0.01211	0.0484739	1.16136	0.215809	1.16136	67.3528	57.995	1.03992	1.29697
ZPR1	11	116773799	116788040	-	323.812	40.8662	35.8349	35.9791	0.0256075	0.084921	1.16131	0.215748	1.16131	38.8819	33.4812	1.01858	1.32403
ATXN7L2	1	109483479	109492805	+	36.3661	6.51872	3.91848	4.04068	0.417323	0.603936	1.16123	0.215654	1.16123	4.04009	3.47914	-1.28467	1.73232
AK2	1	33007940	33080997	-	948.544	119.038	105.131	105.394	0.00167668	0.0103069	1.16122	0.215635	1.16122	114.633	98.7182	1.06868	1.26176
NXT1	20	23350791	23354772	+	354.557	46.3862	39.1801	39.3952	0.045401	0.129206	1.16116	0.215562	1.16116	41.8161	36.0125	1.00272	1.34463
RBM3	X	48574449	48581163	+	2858.73	353.788	316.899	317.637	0.000573913	0.00437392	1.1607	0.214998	1.1607	344.736	297.006	1.07912	1.24845
FBXL8	16	67159932	67164571	+	78.8602	10.3822	8.67278	8.76224	0.173459	0.336973	1.16057	0.214834	1.16057	9.65011	8.31497	-1.10108	1.48307
ACIN1	14	23058564	23095615	-	1451.4	175.15	160.905	161.266	0.000746127	0.00537555	1.16029	0.214486	1.16029	171.615	147.907	1.07648	1.25063
AP002387.2	11	71448674	71452158	+	11.1373	1.69172	1.20527	1.23748	0.627535	0.772939	1.1602	0.21438	1.1602	1.22068	1.05213	-1.45076	1.95284
GATA2	3	128479427	128493202	-	35.5674	5.22127	3.8853	3.95193	0.269807	0.453498	1.16009	0.214235	1.16009	4.25744	3.66993	-1.22102	1.64326
MRPL40	22	19431902	19436076	+	251.311	30.9142	27.827	27.9234	0.0231977	0.0787285	1.15993	0.214044	1.15993	29.3134	25.2716	1.02451	1.31326
AC009779.4	12	55716036	55724704	+	33.077	6.38468	3.47016	3.67522	0.441319	0.626229	1.15965	0.213693	1.15965	3.11595	2.68697	-1.24073	1.66852
FAM189B	1	155247205	155255484	-	623.494	74.7875	69.0041	69.2771	0.0110516	0.0450969	1.1596	0.213631	1.1596	72.8459	62.8197	1.03693	1.29679
TMEM74B	20	1180561	1185416	-	19.0219	3.39774	1.88401	2.11354	0.315576	0.504121	1.15952	0.21353	1.15952	2.53983	2.19041	-1.81229	2.43661
RPIA	2	88691673	88750930	+	167.472	22.0251	18.486	18.608	0.0994836	0.229366	1.15951	0.213514	1.15951	19.8094	17.0843	-1.03416	1.39039
TBCEL	11	121024072	121090776	+	92.1414	11.7756	10.1481	10.2379	0.153269	0.30873	1.1594	0.21338	1.1594	10.9379	9.43407	-1.08744	1.46175
NSRP1	17	30115521	30186476	+	262.938	31.7467	29.1386	29.2153	0.0124417	0.0493068	1.1593	0.213253	1.1593	30.7109	26.4909	1.03821	1.29451
SDAD1	4	75940950	75990963	-	140.988	17.9686	15.5827	15.6654	0.0928667	0.217816	1.15919	0.213118	1.15919	16.5037	14.2372	-1.02661	1.37947
EEF1A1P19	5	43495073	43496455	-	43.2499	6.3841	4.75155	4.80554	0.345735	0.53578	1.15882	0.212662	1.15882	5.31947	4.5904	-1.16086	1.55889
PACRGL	4	20696282	20752908	+	68.2806	9.08144	7.51432	7.58674	0.241257	0.420242	1.15877	0.212594	1.15877	7.96028	6.8696	-1.11106	1.49187
RELA	11	65653597	65663091	-	1216.68	150.028	134.847	135.187	0.00175159	0.0106722	1.15876	0.212586	1.15876	146.59	126.506	1.06636	1.25917
HTR7P1	12	13000420	13004831	+	19.302	3.90044	1.9607	2.14467	0.431838	0.617907	1.15871	0.212523	1.15871	2.64152	2.2797	-1.56774	2.10487
FP236383.4	21	8393419	8394342	-	71936.4	13015	7621.27	7992.94	0.44153	0.626311	1.15862	0.212412	1.15862	9447.99	8154.5	-1.2537	1.68298
AL139300.1	14	103562962	103685925	+	56.6907	11.1319	5.66859	6.29897	0.204973	0.377482	1.15862	0.212404	1.15862	6.45644	5.57254	-1.6706	2.24261
HOTAIRM1	7	27095647	27100266	+	20.0617	3.11625	2.17275	2.22908	0.684292	0.812643	1.15862	0.212402	1.15862	2.29834	1.9837	-1.359	1.82431
ZNF280B	22	22484421	22508743	-	58.1002	8.49216	6.3082	6.45558	0.307137	0.495767	1.15855	0.212325	1.15855	7.06082	6.09452	-1.21878	1.63591
ERICH1	8	614746	738107	-	137.567	18.2303	15.1739	15.2852	0.151544	0.306458	1.15847	0.212215	1.15847	16.5596	14.2944	-1.05327	1.41354
RPL5P17	5	85464434	85465311	+	12.9415	1.97544	1.37831	1.43795	0.792159	0.885064	1.15845	0.212192	1.15845	1.45803	1.2586	-1.54017	2.06691
FLOT2	17	28879335	28897734	-	1353	172.915	149.744	150.333	0.000504051	0.00394782	1.15842	0.212153	1.15842	168.46	145.423	1.07927	1.24336
ASNS	7	97851677	97872543	-	765.552	95.7364	84.8602	85.0613	0.00188549	0.011343	1.15836	0.212089	1.15836	92.6471	79.981	1.06626	1.25842
SLC16A4	1	110362851	110391083	-	429.996	60.0115	47.24	47.7773	0.107592	0.241849	1.15819	0.211872	1.15819	53.7044	46.3692	-1.04114	1.39659
CDK12	17	39461486	39564908	+	1260	152.158	139.654	140	0.00112594	0.00747123	1.15784	0.211437	1.15784	147.538	127.425	1.07164	1.25097
SRBD1	2	45388680	45612166	-	153.637	19.3957	17.0133	17.0708	0.0546902	0.147934	1.15781	0.211404	1.15781	18.2195	15.7361	-1.00454	1.34662
UGDH	4	39498755	39528312	-	3942.46	488.863	436.96	438.051	0.00147238	0.00930398	1.15778	0.211355	1.15778	468.676	404.807	1.06853	1.25448
FYCO1	3	45917899	45995825	-	485.303	59.7411	53.7884	53.9226	0.0048667	0.0238944	1.15766	0.211216	1.15766	58.6359	50.6503	1.05285	1.27291
STAG3L5P-PVRIG2P-PILRB	7	100336104	100367832	+	141.344	18.7905	15.5796	15.7049	0.113159	0.250614	1.15758	0.211106	1.15758	16.3855	14.155	-1.05323	1.41131
AC022306.1	15	49365124	49366686	-	28.7698	4.09971	3.15412	3.19664	0.3916	0.579906	1.15752	0.211038	1.15752	3.46781	2.99589	-1.23164	1.65022
REEP6	19	1491166	1497928	+	66.2065	10.0311	7.15426	7.35628	0.254834	0.436043	1.15751	0.211021	1.15751	8.9168	7.70345	-1.11567	1.4948
AL121900.1	20	18567453	18744217	+	118.68	15.1538	13.1258	13.1867	0.0777974	0.192232	1.15731	0.210773	1.15731	13.6034	11.7543	-1.0176	1.36294
TRMT12	8	124450820	124462151	+	88.424	11.3395	9.78123	9.82489	0.129986	0.276279	1.15727	0.210727	1.15727	10.6933	9.24012	-1.04876	1.40457
PPP1R11	6	30066709	30070334	+	530.002	70.6536	58.688	58.8891	0.00761211	0.033951	1.15725	0.210707	1.15725	64.9326	56.1092	1.04768	1.27829
NUDT5	10	12165330	12196145	-	494.75	61.7888	54.8254	54.9722	0.00740426	0.0332821	1.15725	0.210703	1.15725	58.5016	50.5522	1.04669	1.2795
ZNF292	6	87152833	87265944	+	153.903	19.6763	16.946	17.1004	0.140188	0.29036	1.15722	0.210666	1.15722	18.5071	15.9927	-1.06787	1.43005
ASCC3	6	100508194	100881373	-	758.735	101.095	83.8656	84.3038	0.00507342	0.0247487	1.15712	0.210539	1.15712	94.9135	82.0256	1.05271	1.27189
RRP7BP	22	42555223	42582039	-	82.5851	11.6638	9.08587	9.17613	0.232061	0.410261	1.15693	0.210303	1.15693	9.5773	8.27819	-1.10079	1.47339
FCHO2	5	72956041	73090523	+	179.665	22.6144	19.8003	19.9628	0.110733	0.246557	1.15687	0.210229	1.15687	21.8793	18.9125	-1.04888	1.40377
CSRP1	1	201483530	201509457	-	4783.81	628.897	524.703	531.534	0.000295073	0.00259744	1.15684	0.210185	1.15684	627.649	542.557	1.08285	1.23588
CPNE1	20	35626031	35664957	-	907.712	115.316	100.454	100.857	0.00235245	0.0135532	1.15652	0.209791	1.15652	112.568	97.3335	1.06217	1.25925
INTS13	12	26905181	26938327	-	301	38.6998	33.3254	33.4445	0.0295435	0.0946315	1.15645	0.209703	1.15645	35.6973	30.868	1.01767	1.31415
SSX2IP	1	84643707	84690804	-	194.027	25.0339	21.4043	21.5586	0.051207	0.14101	1.15632	0.209544	1.15632	21.846	18.8926	-1.00637	1.3456
AC015813.1	17	57989039	57994851	-	48.7327	8.02298	5.28438	5.41474	0.513927	0.687633	1.15616	0.209345	1.15616	5.73118	4.95707	-1.24341	1.66208
POLR3D	8	22245133	22254602	+	457.831	56.4352	50.7436	50.8702	0.00694331	0.031676	1.15609	0.209256	1.15609	54.1058	46.8006	1.04714	1.27638
ARHGAP27P1-BPTFP1-KPNA2P3	17	64749663	64781708	-	19.1705	3.43153	2.04396	2.13006	0.633351	0.776724	1.15609	0.209255	1.15609	2.05828	1.78038	-1.40889	1.88305
TFAM	10	58385345	58399221	+	460.753	57.159	50.9514	51.1948	0.0221095	0.0760414	1.15585	0.208956	1.15585	53.2443	46.065	1.02131	1.30812
PAM	5	102753981	103031106	+	411.147	53.0334	45.4787	45.6829	0.0161677	0.0600789	1.15583	0.208934	1.15583	50.7274	43.8882	1.03062	1.29626
COX10	17	14069490	14231737	+	269.215	33.3263	29.7995	29.9128	0.0228542	0.0778572	1.15579	0.208883	1.15579	31.1249	26.9295	1.02257	1.30638
KRT18P28	1	182959074	182960406	-	28.9178	5.10736	3.0472	3.21309	0.78128	0.878261	1.15577	0.208855	1.15577	3.31119	2.86492	-1.45915	1.94914
GSEC	11	126340889	126355588	-	13.5218	2.58205	1.42666	1.50243	0.66595	0.799051	1.15576	0.208836	1.15576	1.69759	1.46882	-1.5682	2.09475
DHX36	3	154272546	154324488	-	472.149	60.8837	52.3031	52.4609	0.0128579	0.0506628	1.15563	0.208677	1.15563	56.7442	49.1025	1.03764	1.28703
RUBCN	3	197668867	197749728	-	167.786	21.7288	18.5361	18.6429	0.103745	0.235712	1.15557	0.208606	1.15557	19.6843	17.0342	-1.02911	1.37422
AL160408.2	1	234607008	234609484	+	22.7448	4.42494	2.07974	2.5272	0.929549	0.966693	1.1554	0.208395	1.1554	2.79796	2.42164	-2.34103	3.12517
NDFIP1	5	142108779	142154441	+	836.001	109.817	92.3324	92.889	0.027526	0.0896482	1.15528	0.208244	1.15528	103.465	89.5584	1.02008	1.3084
SNX16	8	81799581	81842867	-	20.5695	2.84237	2.25193	2.2855	0.403967	0.591166	1.15525	0.208202	1.15525	2.38032	2.06044	-1.28877	1.71999
LRIF1	1	110947190	110963966	-	187.6	25.3902	20.7149	20.8444	0.0967397	0.224771	1.15509	0.208006	1.15509	22.0349	19.0763	-1.03009	1.37438
PLIN2	9	19108375	19149291	-	254.238	33.8487	27.9435	28.2487	0.0819845	0.199456	1.15501	0.207902	1.15501	28.1988	24.4144	-1.02498	1.36737
GPN3	12	110452486	110469269	-	122.47	15.5233	13.5393	13.6078	0.0938122	0.219711	1.15499	0.207882	1.15499	14.0558	12.1697	-1.02515	1.36756
DZIP3	3	108589705	108694841	+	148.226	18.6912	16.3651	16.4696	0.0921266	0.216611	1.15497	0.207851	1.15497	17.149	14.8481	-1.03575	1.38163
C2orf49	2	105337532	105349212	+	122.398	15.4366	13.4993	13.5998	0.103146	0.234833	1.15484	0.207699	1.15484	13.927	12.0596	-1.0452	1.39394
GTF2B	1	88852633	88891945	-	80.2236	9.97238	8.85616	8.91374	0.165144	0.325663	1.15448	0.207247	1.15448	9.64103	8.35095	-1.08036	1.43994
WDR53	3	196554177	196568675	-	30.6868	4.48214	3.34647	3.40964	0.331683	0.521746	1.15447	0.207234	1.15447	3.39561	2.94127	-1.23177	1.64171
CHCHD3	7	132784870	133082091	-	804.195	100.181	89.097	89.355	0.00303203	0.0164681	1.15432	0.207044	1.15432	93.3298	80.8526	1.0588	1.25845
SNORD3A	17	19188016	19188715	+	12.8388	2.27978	1.36052	1.42653	0.507603	0.682643	1.15431	0.207035	1.15431	1.72911	1.49796	-1.4753	1.96574
RRP9	3	51933429	51941905	-	337.192	41.9557	37.2416	37.4657	0.0623138	0.163149	1.15427	0.206977	1.15427	39.7985	34.4794	-1.01361	1.35046
COL4A1	13	110148963	110307158	-	1239.1	178.678	132.896	137.677	0.0095493	0.0403559	1.15396	0.206589	1.15396	171.957	149.015	1.03897	1.28167
PFDN2	1	161100556	161118056	-	275.259	34.8716	30.394	30.5844	0.066128	0.170353	1.15395	0.206581	1.15395	31.5936	27.3787	-1.00786	1.34207
DDX49	19	18919705	18929190	+	374.98	46.386	41.539	41.6644	0.0144852	0.0553738	1.15383	0.206436	1.15383	43.8585	38.0111	1.03375	1.28787
PPP1R10	6	30600413	30618613	-	644.657	83.2136	71.4313	71.6286	0.00717592	0.0324486	1.15382	0.206415	1.15382	77.6503	67.2986	1.04706	1.27146
ACAD11	3	132558138	132660083	-	63.9674	8.64124	6.99973	7.10749	0.21107	0.384951	1.15365	0.206207	1.15365	8.05738	6.98424	-1.14613	1.52539
TAF5	10	103367976	103389066	+	62.1792	7.65237	6.88235	6.9088	0.169315	0.331388	1.15364	0.206194	1.15364	7.25939	6.29259	-1.07406	1.42945
NPC2	14	74476192	74494178	-	577.32	85.7347	62.3157	64.1466	0.0804989	0.196807	1.15361	0.20615	1.15361	78.3192	67.8907	-1.02003	1.35747
ZNF564	19	12525373	12551543	-	21.7669	3.74476	2.3304	2.41854	0.557641	0.72113	1.15351	0.206035	1.15351	2.32642	2.01682	-1.36877	1.82128
RPL37P23	19	52143043	52143337	+	36.5777	5.73969	3.93729	4.06419	0.421087	0.607485	1.15351	0.206029	1.15351	4.26801	3.70003	-1.32556	1.76377
AL513550.1	6	99424922	99432324	+	9.79483	1.39496	1.06952	1.08831	0.550117	0.715655	1.1535	0.206024	1.1535	1.12821	0.978067	-1.47631	1.96434
NFE2L2	2	177227595	177392698	-	830.409	106.793	91.9275	92.2676	0.0179587	0.0648626	1.15348	0.205997	1.15348	98.6719	85.5426	1.02993	1.29185
NSUN6	10	18545561	18659286	-	44.5452	6.99646	4.8643	4.94946	0.320399	0.509334	1.15338	0.205869	1.15338	5.05112	4.3794	-1.19883	1.59479
MRPS18A	6	43671303	43687792	-	300.751	39.5736	33.2453	33.4167	0.0392837	0.116673	1.15338	0.205865	1.15338	34.6861	30.0735	1.00492	1.32377
WTAP	6	159725585	159756320	+	389.288	48.4974	43.1495	43.2542	0.0104843	0.0433181	1.15332	0.205799	1.15332	46.021	39.9029	1.04028	1.27865
NT5C2	10	103088017	103193307	-	730.6	88.628	80.9802	81.1778	0.00246233	0.0140139	1.15322	0.205668	1.15322	85.2034	73.883	1.06093	1.25354
SET	9	128683424	128696401	+	3817.45	460.369	423.259	424.161	0.000807956	0.00572907	1.15307	0.205478	1.15307	451.385	391.465	1.07198	1.24029
PWWP2B	10	132397168	132417860	+	379.989	47.8873	42.0647	42.221	0.0199042	0.0702218	1.15298	0.205363	1.15298	46.3274	40.1807	1.02623	1.29537
CHN1	2	174798809	175005382	-	130.044	16.0991	14.4029	14.4493	0.0737207	0.184768	1.15297	0.205354	1.15297	15.2713	13.2452	-1.01528	1.34965
KRT8P32	5	98392070	98393531	-	14.7389	2.47506	1.55894	1.63766	0.557948	0.72114	1.15291	0.205284	1.15291	1.60995	1.39642	-1.5428	2.05071
GOLM1	9	86026146	86100174	-	504.576	72.2053	55.0612	56.064	0.0175032	0.063723	1.15285	0.205211	1.15285	67.0095	58.1249	1.0304	1.28986
MGAT1	5	180784782	180815653	-	1501.3	181.691	166.455	166.811	0.00135493	0.00871691	1.15251	0.204782	1.15251	177.468	153.983	1.06686	1.24504
PER3	1	7784320	7845178	+	82.6554	13.0018	9.02985	9.18394	0.288444	0.474969	1.15243	0.204678	1.15243	9.18813	7.97284	-1.13261	1.50422
PRR7	5	177446445	177456287	+	510.86	65.7957	56.482	56.7622	0.0276362	0.0899258	1.1524	0.204647	1.1524	62.4149	54.1606	1.01391	1.30982
NRP1	10	33177492	33336263	-	2259.87	295.427	250.196	251.097	0.00728874	0.0328725	1.1524	0.204646	1.1524	274.494	238.193	1.04513	1.27069
[truncated: 12,367 more rows]
