# Supplementary material for: Overexpression screen of interferon-stimulated genes identifies RARRES3 as a restrictor of Toxoplasma gondii infection
Source: eLife. 2021 Dec 6;10:e73137. doi: 10.7554/eLife.73137 (PMC8789288; doi:10.7554/eLife.73137)
Supplement: Figure 3—source data 2. [file elife-73137-fig3-data2.xlsx]

## Sheet: Sheet1
Gene symbol	Chromosome	Start	Stop	Strand	Total counts	Maximum counts	Geometric mean	Arithmetic mean	P-value	FDR step up	Ratio	Log2(Ratio)	Fold change	LSMean(+)	LSMean(-)	FC 95% lower limit	FC 95% upper limit
IDO1	8	39902275	39928791	+	1015.67	351.948	1.70991	112.852	1.42188e-06	0.000103165	404.737	8.66084	404.737	15.0277	0.0371295	29.029	5643.03
GBP4	1	89181144	89198943	-	980.333	333.517	3.91438	108.926	5.63415e-05	0.0020388	157.34	7.29775	157.34	15.3365	0.0974735	10.4254	2374.6
OAS2	12	112978395	113011724	+	235.471	59.3137	1.10329	26.1635	8.62903e-07	7.00365e-05	650.223	9.34479	650.223	24.2183	0.0372461	45.8454	9222.08
APOL3	22	36140330	36166178	-	210.042	52.5974	2.30534	23.338	4.35214e-05	0.00168072	185.096	7.53213	185.096	19.3005	0.104273	12.0405	2845.45
UBD	6	29555515	29559733	-	331.893	119.751	4.46745	36.877	9.8603e-06	0.000516982	5.01688	2.32679	5.01688	2.28866	0.456191	2.77331	9.07547
BST2	19	17402939	17405631	-	132.795	38.4254	3.67956	14.755	2.14823e-11	5.71509e-09	55.1906	5.78635	55.1906	9.47342	0.171649	34.3895	88.5735
BATF2	11	64987945	64997019	-	624.498	201.664	13.4369	69.3887	5.8964e-12	2.01685e-09	6.95123	2.79727	6.95123	9.32633	1.34168	5.63052	8.58174
GBP1	1	89052319	89065231	-	1276.11	409.818	39.0437	141.79	9.60971e-15	7.66962e-12	9.18368	3.19907	9.18368	37.997	4.13744	7.86927	10.7176
C4B	6	32014795	32035419	+	121.235	47.4263	1.53541	13.4705	0.974946	0.989899	0.84279	-0.246755	-1.18654	0.361108	0.428468	-2.89225	2.05435
TNFRSF1B	1	12166991	12209229	+	37.1592	11.0402	1.38164	4.1288	1.45132e-10	3.1119e-08	25.4714	4.6708	25.4714	2.65894	0.104389	16.366	39.6425
ACSL5	10	112374018	112428381	+	64.8038	15.1872	2.52134	7.20042	4.60089e-12	1.61211e-09	38.0654	5.25041	38.0654	6.52945	0.171533	25.7018	56.3763
IFIT3	10	89327997	89340972	+	771.032	201.837	30.0242	85.6703	4.51728e-15	4.0742e-12	20.492	4.35699	20.492	53.1294	2.59269	16.7695	25.0409
HAPLN3	15	88877294	88895598	-	437.198	155.184	6.34982	48.5776	0.000726834	0.013596	0.517746	-0.949683	-1.93145	0.98895	1.91011	-2.68526	-1.38925
TNFRSF14	1	2555639	2565383	+	44.0515	12.1245	1.76418	4.89462	3.6157e-10	7.21433e-08	28.5545	4.83565	28.5545	4.04147	0.141535	17.3273	47.0562
SOCS1	16	11254408	11256205	-	188.211	60.3605	4.83582	20.9124	4.72666e-05	0.00177293	3.168	1.66357	3.168	2.61487	0.825398	1.96759	5.10078
CMPK2	2	6840570	6866636	-	150.666	33.485	6.19644	16.7406	1.50771e-12	6.01662e-10	36.1252	5.17493	36.1252	16.7453	0.463536	25.185	51.8177
CD74	5	150400041	150412930	-	98.1458	19.9128	3.50348	10.9051	1.48787e-10	3.14333e-08	79.695	6.31642	79.695	17.3083	0.217182	42.2315	150.392
TRIM22	11	5689697	5737090	+	351.885	91.9359	15.1381	39.0984	4.70409e-14	2.70316e-11	21.5998	4.43295	21.5998	29.9797	1.38796	16.9931	27.4553
IFI44	1	78649796	78664079	+	82.3492	16.7258	3.24397	9.14991	1.2868e-12	5.43713e-10	75.7967	6.24406	75.7967	15.293	0.201763	49.3641	116.383
C4A	6	31982057	32002682	+	88.4678	33.5921	1.53599	9.82975	0.424213	0.668411	1.60906	0.686218	1.60906	0.839425	0.521686	-3.29454	8.52982
PLAAT4	11	63536808	63546463	+	321.79	73.6188	14.7852	35.7544	2.50037e-12	9.70817e-10	28.8667	4.85133	28.8667	39.0642	1.35326	20.297	41.0547
MX1	21	41420304	41459215	+	331.597	92.4829	12.2762	36.8441	1.49286e-17	4.28928e-14	104.075	6.70148	104.075	75.256	0.723093	84.6659	127.934
IRF1	5	132481609	132490778	-	3612.4	995.376	160.878	401.378	6.37928e-19	9.16448e-15	9.67141	3.27373	9.67141	202.856	20.9748	8.91536	10.4916
PSMB9	6	32844136	32859852	+	551.775	145.695	26.5297	61.3083	4.43188e-16	9.09549e-13	11.1377	3.47738	11.1377	38.3542	3.44363	9.72796	12.7517
APOL1	22	36253071	36267531	+	1978.97	497.714	97.1923	219.885	1.12681e-15	1.47162e-12	12.6959	3.66629	12.6959	154.977	12.2068	10.8935	14.7965
UBA7	3	49805209	49813954	-	173.522	36.7786	8.10486	19.2802	1.33989e-08	2.00509e-06	26.7523	4.74159	26.7523	23.915	0.893943	13.5845	52.684
PARP10	8	143977153	144012773	-	560.247	126.215	28.9806	62.2496	6.55747e-15	5.54145e-12	23.1512	4.53301	23.1512	72.0626	3.1127	18.6931	28.6725
ICAM1	19	10271093	10286616	+	56.0243	20.1215	1.16814	6.22492	0.00342932	0.0393182	0.388604	-1.36363	-2.57331	0.1973	0.507715	-4.72041	-1.40283
EXOC3L1	16	67184379	67190186	-	36.5347	10.2927	1.7992	4.05941	4.51533e-08	5.8439e-06	8.32264	3.05704	8.32264	2.29654	0.275939	5.36079	12.9209
APOL6	22	35648446	35668405	+	1777.62	499.474	86.2788	197.514	8.14984e-16	1.46351e-12	4.92024	2.29873	4.92024	79.8875	16.2365	4.48219	5.40111
IL18BP	11	71998613	72005716	+	673.091	216.663	25.8312	74.7878	2.91411e-06	0.000187732	1.68849	0.75573	1.68849	11.9624	7.08466	1.44706	1.97019
TRIM31	6	30102897	30113091	-	293.377	90.0253	15.0181	32.5974	1.95521e-10	4.01265e-08	5.11642	2.35514	5.11642	14.914	2.91492	4.07155	6.42944
CD274	9	5450503	5470567	+	67.378	21.7745	2.51639	7.48645	0.0875624	0.281982	1.42931	0.515318	1.42931	1.0769	0.75344	-1.05173	2.14861
UBE2L6	11	57551656	57568285	-	1410.69	386.756	75.6866	156.743	1.11608e-15	1.47162e-12	5.74827	2.52313	5.74827	81.7767	14.2263	5.17692	6.38267
SAMD9L	7	93130056	93148386	-	432.119	120.033	24.0371	48.0133	1.9035e-13	9.76631e-11	7.34314	2.8764	7.34314	30.781	4.19181	6.18871	8.71293
NLRC5	16	56989485	57083532	+	816.333	243.273	40.3808	90.7037	1.70073e-08	2.41908e-06	2.84274	1.50728	2.84274	28.7045	10.0975	2.31384	3.49252
LAMP3	3	183122215	183163840	-	22.6922	7.15262	1.22959	2.52135	1.14454e-05	0.000585141	6.7027	2.74474	6.7027	1.64613	0.245592	3.40276	13.2029
IRF8	16	85899162	85922607	+	47.2593	18.4299	1.69969	5.25104	0.64319	0.822949	0.864244	-0.210489	-1.15708	0.57318	0.663215	-1.98649	1.48375
ISG20	15	88636153	88656484	+	247.795	73.9674	14.5409	27.5328	5.30769e-11	1.28273e-08	5.54222	2.47046	5.54222	16.6429	3.00293	4.45175	6.89981
PARP14	3	122680839	122730841	+	3161.44	865.753	179.555	351.271	7.46605e-14	4.12528e-11	4.25401	2.08883	4.25401	171.676	40.3562	3.78821	4.7771
PARP9	3	122527924	122564578	-	856.452	218.841	52.1839	95.1613	3.5411e-14	2.2118e-11	5.72993	2.51852	5.72993	62.1704	10.8501	5.01958	6.5408
PSMB8-AS1	6	32844078	32846501	+	91.0819	24.2723	5.32336	10.1202	6.56093e-08	8.05592e-06	4.41426	2.14217	4.41426	5.4315	1.23044	3.17571	6.13586
CIITA	16	10866222	10943022	+	72.2875	23.6238	3.71853	8.03194	0.000744	0.0137843	2.0907	1.06399	2.0907	2.35266	1.12529	1.43192	3.05257
WARS1	14	100333790	100376806	-	9609.13	3037.98	429.656	1067.68	0.0158593	0.102263	1.11574	0.158005	1.11574	175.851	157.609	1.02496	1.21456
TAP1	6	32845209	32853979	-	3862.63	1127.46	205.772	429.181	3.48137e-12	1.25846e-09	2.1803	1.12452	2.1803	131.83	60.4644	2.00951	2.3656
NNMT	11	114257787	114313286	+	231.419	79.5062	9.91375	25.7133	0.916506	0.965376	1.02583	0.0367975	1.02583	3.93526	3.83616	-1.38343	1.45583
PLEKHA4	19	48837097	48868618	-	44.4361	9.94384	2.72002	4.93734	5.07283e-10	9.94056e-08	16.9567	4.08378	16.9567	7.07332	0.417141	11.0854	25.9377
IFI27	14	94104836	94116699	+	231.787	79.8024	4.55204	25.7541	2.90027e-12	1.09646e-09	234.601	7.87406	234.601	71.7453	0.305819	131.364	418.969
GBP2	1	89106132	89150457	-	388.99	128.724	16.1391	43.2211	0.00292406	0.0349476	0.749783	-0.415455	-1.33372	5.20368	6.94024	-1.58539	-1.122
IFIH1	2	162267074	162318685	-	329.3	73.0084	21.8277	36.5889	3.20153e-15	3.53794e-12	9.7714	3.28857	9.7714	39.1989	4.01159	8.43858	11.3147
ISG15	1	1001138	1014541	+	491.605	85.2682	31.3533	54.6228	1.06046e-17	3.80865e-14	15.9457	3.9951	15.9457	78.0844	4.89688	14.137	17.9859
PLA1A	3	119597875	119629812	+	23.0622	5.4081	1.45155	2.56247	5.19846e-07	4.60994e-05	10.8276	3.43665	10.8276	2.98524	0.275705	5.71128	20.5274
OASL	12	121019111	121039243	-	80.5036	15.4139	5.15427	8.94485	8.58212e-13	3.73608e-10	15.7692	3.97904	15.7692	12.9381	0.820466	12.1453	20.4744
IFI35	17	43006740	43014457	+	998.675	274.587	63.5455	110.964	3.50398e-12	1.25846e-09	3.61045	1.85218	3.61045	60.4891	16.7539	3.15439	4.13244
IRF1-AS1	5	132410636	132488703	+	87.0062	20.6534	5.94263	9.66736	1.20415e-10	2.62103e-08	5.6836	2.50681	5.6836	7.78183	1.36917	4.49895	7.18019
TCAF2	7	143620952	143730410	+	27.4346	8.93476	1.20658	3.04829	0.570115	0.780404	0.831457	-0.266287	-1.20271	0.48426	0.582423	-2.57596	1.78081
IFITM3	11	319676	327538	-	299.732	63.984	20.981	33.3036	1.59499e-11	4.40648e-09	7.58674	2.92348	7.58674	34.5006	4.54748	5.97331	9.63596
IFIT2	10	89283694	89309272	+	90.8947	19.8004	6.43464	10.0994	6.44218e-12	2.1428e-09	7.71045	2.94681	7.71045	10.6323	1.37894	6.16753	9.63934
GBP3	1	89006679	89022895	-	380.707	104.846	25.2369	42.3007	1.15952e-09	2.03143e-07	2.97939	1.57502	2.97939	22.3782	7.511	2.50774	3.53975
TNFSF10	3	172505508	172523476	-	42.234	12.8085	2.83949	4.69267	1.24321e-05	0.000626667	3.60369	1.84947	3.60369	2.9322	0.813667	2.33318	5.56604
DDX60	4	168216294	168318805	-	259.046	60.2731	18.6486	28.7829	7.7604e-13	3.48394e-10	5.35175	2.42001	5.35175	24.7802	4.63029	4.57138	6.26533
DTX3L	3	122564338	122575204	+	1866.61	449.259	133.586	207.401	1.38855e-15	1.66233e-12	4.13819	2.049	4.13819	150.759	36.4311	3.79624	4.51093
IRF9	14	24161265	24166566	+	498.034	99.3428	36.152	55.3371	4.59975e-13	2.13161e-10	7.74101	2.95252	7.74101	62.5767	8.08378	6.4185	9.33602
IL15RA	10	5943639	5978188	-	176.446	43.2641	12.8024	19.6051	2.09486e-11	5.67824e-09	4.32969	2.11426	4.32969	15.0732	3.48136	3.63624	5.15538
FLT3LG	19	49474207	49486232	+	48.3088	10.6351	3.47613	5.36764	2.91188e-07	2.82649e-05	5.36063	2.4224	5.36063	4.83814	0.902532	3.5175	8.16955
IFIT1	10	89392546	89406488	+	227.868	63.1859	12.6102	25.3186	2.78091e-14	1.81594e-11	28.5921	4.83755	28.5921	53.0063	1.85388	22.2348	36.7672
PSMB8	6	32840717	32844680	-	833.694	179.792	61.7086	92.6327	4.00635e-15	4.0742e-12	5.85468	2.54959	5.85468	89.3499	15.2613	5.21686	6.57047
IFI16	1	158999968	159055156	+	84.0618	15.4918	6.0203	9.3402	6.93257e-11	1.63268e-08	9.7792	3.28972	9.7792	12.3952	1.2675	7.28282	13.1313
LAP3	4	17577192	17607973	+	1562.54	417.294	106.332	173.616	1.03295e-11	2.96787e-09	2.25591	1.17371	2.25591	82.2325	36.452	2.05789	2.47299
RASGRP3	2	33436324	33564751	+	92.1957	27.9957	5.57194	10.244	0.0188492	0.114016	1.69705	0.76303	1.69705	3.83291	2.25857	-1.05211	3.03006
TAP2	6	32821833	32838771	-	1510.14	365.082	108.47	167.793	8.04678e-11	1.83492e-08	3.21572	1.68514	3.21572	107.141	33.3179	2.75935	3.74757
CD38	4	15778275	15853233	+	119.157	36.7221	8.50571	13.2396	7.4195e-07	6.23325e-05	3.31502	1.72902	3.31502	8.71137	2.62785	2.41825	4.54435
SAMHD1	20	36890229	36951844	-	897.244	221.402	64.6695	99.6938	3.62713e-11	9.14164e-09	2.94332	1.55744	2.94332	60.7512	20.6404	2.57679	3.36198
APOL2	22	36226209	36239955	-	1599.18	408.125	116.043	177.687	9.50936e-12	2.84607e-09	2.69928	1.43257	2.69928	104.297	38.6388	2.41568	3.01617
PIK3AP1	10	96593315	96720515	-	156.001	42.7254	11.3526	17.3335	2.77968e-06	0.000180692	2.93287	1.55232	2.93287	11.0692	3.77418	2.12912	4.04005
C1R	12	7080214	7092541	-	905.867	261.659	61.7429	100.652	1.12279e-05	0.000576074	1.71583	0.778908	1.71583	41.8178	24.3718	1.43136	2.05683
TLR3	4	186069155	186088074	+	166.173	35.9371	12.8339	18.4636	8.32998e-12	2.54614e-09	5.69986	2.51093	5.69986	19.3237	3.3902	4.69344	6.92209
CTSS	1	150730188	150765793	-	478.188	123.327	34.4132	53.132	9.06666e-10	1.66989e-07	2.20204	1.13884	2.20204	27.4737	12.4764	1.94648	2.49117
PRRG4	11	32829927	32858121	+	55.8019	13.8149	4.23896	6.20021	1.28504e-07	1.40923e-05	3.39518	1.76349	3.39518	4.53216	1.33488	2.57542	4.47588
IFI6	1	27666064	27672199	-	820.267	244.544	39.663	91.1408	2.23439e-18	1.60496e-14	38.2677	5.25805	38.2677	216.208	5.64987	33.1887	44.124
SEMA3F	3	50155045	50189076	+	181.407	53.2466	11.6548	20.1563	0.257221	0.514514	1.10829	0.148341	1.10829	6.02732	5.43838	-1.10701	1.35976
IGFLR1	19	35738801	35742454	-	273.783	75.3241	18.7664	30.4204	0.000248929	0.00614453	1.47033	0.556145	1.47033	11.7219	7.97228	1.23594	1.74918
CEACAM1	19	42507304	42561235	-	247.734	62.1419	18.9878	27.526	5.9818e-07	5.14578e-05	3.10458	1.6344	3.10458	20.0129	6.44625	2.30069	4.18937
PSMB10	16	67934506	67936865	-	842.227	193.555	66.4097	93.5808	2.7934e-13	1.38379e-10	3.42394	1.77566	3.42394	73.6772	21.5182	3.07261	3.81545
HELZ2	20	63558086	63574240	-	1393.52	253.565	109.167	154.835	9.26332e-17	2.21795e-13	7.23379	2.85475	7.23379	199.475	27.5755	6.54708	7.99252
AC099548.2	7	143761790	143836934	-	39.9691	11.8603	2.60481	4.44102	0.584049	0.787778	1.17088	0.227588	1.17088	1.44796	1.23665	-1.33187	1.82593
PRRT2	16	29811382	29815893	+	31.6992	9.80349	1.97049	3.52213	0.168322	0.408188	1.33068	0.412161	1.33068	1.29226	0.971127	-1.64418	2.91135
IFI30	19	18173162	18178118	+	554.451	137.287	42.2563	61.6057	7.96238e-10	1.5051e-07	2.38984	1.25691	2.38984	37.0755	15.5138	2.08877	2.7343
HLA-E	6	30489509	30494195	+	2197.04	593.231	156.163	244.116	1.39223e-06	0.000101526	1.38034	0.465025	1.38034	96.5139	69.9203	1.26284	1.50877
RNF213-AS1	17	80351828	80415169	-	48.4823	13.318	3.68925	5.38692	0.00019009	0.00500153	2.19735	1.13576	2.19735	3.15192	1.43442	1.54395	3.12725
CAND2	3	12796472	12871917	+	65.265	17.4918	4.3717	7.25166	0.564341	0.776169	1.08734	0.120802	1.08734	2.36332	2.17349	-1.31505	1.55479
RNF213	17	80260866	80398787	+	11559.1	2898.27	864.206	1284.35	1.38873e-08	2.03157e-06	1.72976	0.790573	1.72976	625.984	361.89	1.55946	1.91866
HLA-B	6	31269491	31357189	-	1164.17	237.188	84.0163	129.353	5.81382e-18	2.78405e-14	12.3507	3.62652	12.3507	227.496	18.4197	11.1199	13.7177
BTN3A3	6	26440472	26453416	+	86.3971	20.8458	6.74512	9.59968	4.11302e-05	0.00161442	3.01721	1.59321	3.01721	7.41285	2.45686	1.9249	4.72937
STAT2	12	56341597	56360168	-	528.052	137.033	39.8847	58.6725	4.17847e-05	0.00163564	1.76911	0.823026	1.76911	29.9067	16.9049	1.43185	2.18582
SP110	2	230167293	230225730	-	340.998	78.9282	27.491	37.8887	3.40423e-11	8.73307e-09	2.59587	1.37622	2.59587	26.4996	10.2084	2.30811	2.91951
NMI	2	151270470	151289895	-	266.407	60.8095	21.5222	29.6008	1.06745e-09	1.89321e-07	2.70264	1.43437	2.70264	21.3693	7.90683	2.30979	3.16232
HCP5	6	31463170	31478937	+	22.9747	5.38023	1.6357	2.55275	1.1941e-07	1.31957e-05	11.2647	3.49374	11.2647	4.44028	0.394176	6.39366	19.8468
HLA-F	6	29722775	29738529	+	170.161	33.8775	14.1551	18.9068	2.40883e-11	6.29186e-09	4.94424	2.30575	4.94424	21.4206	4.33244	4.08196	5.98868
C3	19	6677704	6730563	-	482.793	137.965	33.5485	53.6436	0.538908	0.758555	0.952178	-0.0706964	-1.05022	17.0461	17.9023	-1.25657	1.13926
TRIM21	11	4384897	4393703	-	447.128	103.014	36.8811	49.6809	1.67037e-09	2.85673e-07	2.47448	1.30712	2.47448	35.5775	14.3778	2.13216	2.87175
ASPHD2	22	26429260	26445016	+	66.0172	16.3226	5.35164	7.33525	7.90779e-05	0.00266393	2.27909	1.18846	2.27909	4.95402	2.17368	1.64904	3.14986
IRF7	11	612553	615984	-	209.633	42.1969	16.7268	23.2925	3.11019e-13	1.48937e-10	7.9388	2.98892	7.9388	35.4363	4.46368	6.6146	9.5281
ERAP2	5	96875986	96919704	+	74.2781	16.2241	6.21878	8.25312	2.73684e-07	2.71155e-05	3.83952	1.94093	3.83952	8.23097	2.14375	2.75856	5.34407
MMP25-AS1	16	3037400	3059371	-	230.441	63.1308	15.9882	25.6046	0.0328611	0.160045	0.830972	-0.267129	-1.20341	7.54432	9.07891	-1.42662	-1.01513
RARRES1	3	158696892	158732490	-	79.3535	24.3815	5.30855	8.81706	0.760384	0.888465	0.846082	-0.241131	-1.18192	2.64679	3.1283	-1.90743	1.36544
CD40	20	46118278	46129864	+	108.477	24.1617	9.21414	12.053	1.12748e-08	1.76058e-06	2.99138	1.58081	2.99138	10.2532	3.42758	2.43613	3.67319
AC116347.1	5	98213402	98214122	+	62.9741	13.2346	5.30865	6.99713	1.02622e-06	8.14511e-05	3.66448	1.87361	3.66448	6.89861	1.88256	2.56767	5.2298
TAPBPL	12	6451690	6466518	+	189.988	36.6349	16.1545	21.1098	1.44527e-12	5.93221e-10	5.00163	2.3224	5.00163	25.419	5.08215	4.26844	5.86074
ODF3B	22	50529710	50532581	-	61.2155	14.9123	5.16238	6.80172	4.55653e-06	0.000270492	2.45281	1.29444	2.45281	5.0943	2.07692	1.87113	3.21533
CRYBG1	6	106360717	106572018	+	34.9978	8.72268	2.95285	3.88864	2.94832e-05	0.00124943	3.20621	1.68087	3.20621	3.53753	1.10334	2.14041	4.80274
TGM2	20	38127385	38166579	-	10348.5	2644.68	779.114	1149.84	0.0946615	0.293843	1.10602	0.145378	1.10602	451.332	408.069	-1.02099	1.24895
CTSO	4	155924118	155953867	-	46.5935	12.6478	3.78391	5.17705	0.00269433	0.0330827	1.93605	0.953115	1.93605	3.24775	1.67751	1.31337	2.85395
TYMP	22	50525752	50530033	-	650.925	153.955	54.0481	72.325	3.27601e-09	5.40955e-07	1.97075	0.978742	1.97075	46.034	23.3586	1.75536	2.21257
SOCS3	17	78356778	78360078	-	260.805	81.0199	18.6292	28.9783	0.17105	0.412852	0.855531	-0.225108	-1.16886	9.24877	10.8106	-1.48184	1.08461
SEPTIN4	17	58520250	58544369	-	17.2234	4.7103	1.38501	1.91371	0.0242031	0.133219	1.83923	0.879099	1.83923	1.17692	0.639901	1.04505	3.23694
CFB	6	31945650	31952085	+	152.383	33.9008	13.1046	16.9315	3.18884e-07	3.01047e-05	3.03289	1.60069	3.03289	15.2519	5.02884	2.32871	3.95
MUC1	1	155185824	155192917	-	77.9837	21.7193	6.24862	8.66485	0.0179652	0.1102	1.35218	0.43529	1.35218	4.23368	3.131	1.06186	1.72189
RAB20	13	110523066	110561723	-	110.579	26.6912	9.23417	12.2865	9.14456e-05	0.00294553	1.87369	0.90588	1.87369	7.8274	4.17754	1.44403	2.43119
BTN3A1	6	26402237	26415209	+	190.978	46.5086	16.5319	21.2198	5.73963e-08	7.23294e-06	2.4583	1.29766	2.4583	16.7871	6.82873	2.02893	2.97853
PSME2P2	13	48771128	48771828	+	225.438	51.1024	19.8183	25.0487	6.44739e-09	1.05254e-06	3.19267	1.67476	3.19267	24.2341	7.59055	2.58514	3.94297
MMP25	16	3046561	3060727	+	13.5452	4.66259	1.00086	1.50503	0.766505	0.891545	1.01692	0.024207	1.01692	0.59648	0.586555	-1.91468	1.98002
JAK2	9	4984390	5129949	+	157.705	39.5135	12.8835	17.5228	0.00532785	0.0519972	1.2701	0.344943	1.2701	8.542	6.72545	1.08617	1.48518
PHACTR1	6	12716805	13290485	+	17.1129	3.56816	1.51238	1.90143	3.20426e-05	0.00132658	3.48568	1.80144	3.48568	1.98946	0.570754	2.21987	5.47327
AL139011.2	1	160216800	160285131	-	25.6442	9.76572	1.93363	2.84936	0.103887	0.310825	2.38325	1.25293	2.38325	2.30015	0.965131	-1.04323	5.92542
PML	15	73994673	74047828	+	1004.4	214.335	88.2067	111.599	1.87938e-10	3.91292e-08	2.15703	1.10905	2.15703	83.7061	38.8061	1.93809	2.40071
STAT1	2	190908460	191020961	-	7341.41	1744.22	624.687	815.712	5.85408e-07	5.06625e-05	1.59644	0.674859	1.59644	486.897	304.989	1.41647	1.79928
C1S	12	6988259	7071033	+	876.67	245.54	66.9288	97.4078	0.54766	0.764669	0.908017	-0.139209	-1.1013	36.3582	40.0414	-1.42749	1.17696
PLSCR1	3	146515180	146544857	-	520.673	104.409	46.8854	57.8526	6.56294e-12	2.1428e-09	2.91821	1.54508	2.91821	55.0887	18.8776	2.59615	3.28022
CASP4	11	104942866	104969367	-	74.9533	20.5851	6.43345	8.32814	0.00350323	0.039816	1.62854	0.703578	1.62854	5.22678	3.20949	1.20062	2.20898
SP140L	2	230327184	230403733	+	174.494	34.5361	15.8258	19.3882	8.94145e-10	1.66822e-07	2.58159	1.36826	2.58159	17.35	6.72066	2.22671	2.99303
PARP12	7	140023749	140062952	-	596.016	113.172	54.3332	66.224	1.01014e-11	2.96155e-09	3.08064	1.62323	3.08064	67.4825	21.9053	2.7148	3.49578
IFIT5	10	89414568	89420998	+	346.204	68.1992	31.5807	38.4671	1.1554e-10	2.55362e-08	2.90053	1.53632	2.90053	37.7534	13.016	2.51197	3.3492
TRIM69	15	44728988	44767830	+	205.464	46.6659	17.9844	22.8294	0.000116017	0.00345665	1.61249	0.689286	1.61249	14.5802	9.04208	1.33142	1.95288
ACY3	11	67642555	67650731	-	110.558	21.3704	9.94995	12.2842	1.44089e-08	2.06998e-06	3.79487	1.92405	3.79487	14.359	3.78378	2.92775	4.9188
IL32	16	3065297	3082193	+	512.682	141.9	38.6794	56.9647	0.00028866	0.00682054	0.692357	-0.530412	-1.44434	17.9036	25.859	-1.71492	-1.21645
GLI3	7	41960949	42237871	-	11.4523	2.61687	1.02706	1.27247	0.00249956	0.0316354	2.63219	1.39626	2.63219	1.17726	0.447254	1.49399	4.63751
CFH	1	196652043	196747505	+	814.914	208.947	68.621	90.546	0.0684703	0.243449	1.29766	0.375913	1.29766	49.1958	37.9112	-1.03784	1.74764
BATF3	1	212686417	212699841	-	134.405	33.8325	11.6091	14.9339	0.00599467	0.0562137	1.41004	0.495734	1.41004	8.71105	6.17789	1.10682	1.79633
LINC02577	7	106774955	106838481	+	14.4518	4.48305	1.13001	1.60576	0.91436	0.964401	0.938297	-0.0918837	-1.06576	0.669688	0.713727	-1.97745	1.74095
CXCL2	4	74097040	74099197	-	32.3	9.76806	2.70867	3.58889	0.288223	0.545419	1.21068	0.275814	1.21068	1.858	1.53468	-1.23767	1.81409
TMEM229B	14	67447084	67533740	-	30.5341	6.28036	2.79852	3.39267	1.20785e-05	0.000610985	2.72396	1.4457	2.72396	3.25153	1.19368	1.95311	3.79904
B2M	15	44711487	44718878	+	3370.63	634.936	311.922	374.515	1.2768e-14	9.65395e-12	2.75186	1.46041	2.75186	365.765	132.915	2.56149	2.95639
REC8	14	24171853	24180258	+	40.5138	7.47885	3.61336	4.50153	1.39803e-05	0.000685466	3.57598	1.83834	3.57598	5.23953	1.4652	2.26292	5.65094
HERC6	4	88378739	88443098	+	189.322	32.6616	17.3539	21.0358	7.56267e-11	1.75234e-08	3.80897	1.9294	3.80897	25.5305	6.70272	3.20165	4.53149
OAS3	12	112938444	112973252	+	4051.84	717.178	375.362	450.204	2.33518e-14	1.67736e-11	3.3563	1.74687	3.3563	507.215	151.123	3.06956	3.66983
FP236383.3	21	8380643	8454793	+	127.872	27.3553	11.7974	14.208	7.378e-07	6.23325e-05	2.28033	1.18924	2.28033	12.4021	5.43873	1.83951	2.82678
PSME2	14	24143362	24147571	-	1018.49	194.753	94.914	113.166	6.8189e-12	2.1769e-09	2.59024	1.37308	2.59024	108.443	41.8662	2.33336	2.87538
ST8SIA4	5	100806933	100903283	-	429.145	111.039	37.8868	47.6828	0.00370929	0.0414728	1.38071	0.465413	1.38071	28.6455	20.7469	1.13569	1.67859
ATP10D	4	47485275	47593487	+	112.703	27.0151	10.2662	12.5225	4.72063e-05	0.00177293	1.78996	0.839925	1.78996	9.21617	5.14882	1.43658	2.23026
DDX58	9	32455302	32526209	-	276.086	47.2767	25.1921	30.6762	1.43155e-09	2.47779e-07	3.99334	1.9976	3.99334	38.9891	9.76353	3.18583	5.00554
CRYZL2P-SEC16B	1	177928788	178038008	-	63.7582	16.8211	5.69175	7.08424	0.00827289	0.069138	1.80707	0.853652	1.80707	5.31159	2.93934	1.20187	2.71702
CADPS2	7	122318411	122886760	-	41.031	9.07158	3.81524	4.55899	2.04113e-05	0.000930885	2.45031	1.29296	2.45031	4.25857	1.73797	1.79221	3.35006
TRANK1	3	36826820	36945099	-	228.439	45.5319	21.1457	25.3821	1.01843e-06	8.12822e-05	2.64552	1.40355	2.64552	25.0688	9.47595	2.02373	3.45836
TRIM34	11	5619764	5644399	+	67.6338	12.5574	4.86557	7.51487	0.0131268	0.0921628	2.70597	1.43614	2.70597	7.55346	2.79141	-1.4166	10.3727
DDX60L	4	168356735	168537787	-	346.258	64.9834	32.5701	38.4731	7.24843e-12	2.26372e-09	2.86445	1.51826	2.86445	40.3383	14.0824	2.55036	3.21722
GSDMB	17	39904595	39919855	-	21.7379	4.9405	1.84727	2.41532	0.0143818	0.0972975	2.08744	1.06173	2.08744	2.04019	0.977368	-1.04236	4.54196
AGT	1	230702523	230714123	-	76.9624	22.4149	6.15085	8.55138	0.835019	0.924491	0.947988	-0.0770595	-1.05487	3.8846	4.09773	-1.82241	1.63776
TRAFD1	12	112125538	112153605	+	390.028	86.2742	34.7548	43.3364	0.000342552	0.00770124	1.24128	0.311824	1.24128	24.707	19.9045	1.1236	1.37127
VASH2	1	212950520	212992038	+	151.001	30.9653	14.1052	16.7778	6.25801e-07	5.33411e-05	2.57783	1.36616	2.57783	16.5079	6.4038	2.0096	3.30673
SAMD9	7	93099513	93118024	-	234.793	38.3708	21.5348	26.0881	5.35737e-11	1.28273e-08	4.19738	2.06949	4.19738	34.7693	8.28357	3.49563	5.04001
CA13	8	85220587	85284074	+	73.9709	18.6664	6.08743	8.21899	0.205535	0.456402	0.803306	-0.315978	-1.24485	3.32024	4.13321	-1.71574	1.10717
MSRB1	16	1938210	1943327	-	544.49	125.706	47.2855	60.4988	0.364445	0.619307	0.957799	-0.0622056	-1.04406	28.7546	30.0216	-1.15445	1.05907
APOBEC3F	22	39040604	39055973	+	153.878	30.277	14.5379	17.0976	1.24352e-06	9.3044e-05	2.16321	1.11317	2.16321	15.3232	7.08355	1.75113	2.67226
OAS1	12	112906783	112933223	+	640.062	122.983	57.3685	71.118	3.81526e-14	2.28375e-11	5.22562	2.3856	5.22562	109.491	20.9527	4.606	5.92859
SP100	2	230415942	230545607	+	468.038	91.7361	44.6801	52.0042	1.0088e-09	1.83448e-07	2.02379	1.01706	2.02379	45.2778	22.3728	1.81179	2.26058
SEC16B	1	177923956	177984304	-	109.4	24.132	10.0134	12.1556	0.0263358	0.140092	1.58711	0.666398	1.58711	8.90082	5.60821	1.09776	2.29458
TIMM23B-AGAP6	10	49942056	50011655	+	18.3044	5.43344	1.00414	2.03382	0.0113338	0.08443	5.09032	2.34776	5.09032	3.10633	0.610243	1.10369	23.477
AC083862.1	7	135168403	135169548	+	25.5181	6.00982	2.21647	2.83534	0.572973	0.781958	1.18686	0.247144	1.18686	1.6694	1.40657	-1.48668	2.09418
PSME1	14	24136163	24138968	+	1134.48	196.61	109.514	126.054	1.04667e-13	5.56904e-11	2.65166	1.4069	2.65166	134.364	50.6715	2.44803	2.87222
ANXA2R	5	43039081	43043171	-	14.7857	4.18464	1.36246	1.64285	0.164399	0.403031	1.37755	0.462109	1.37755	1.0986	0.797502	-1.1858	2.25025
IRF2	4	184387729	184474551	-	199.845	42.5424	18.8737	22.205	1.78421e-05	0.000843157	1.49839	0.583415	1.49839	15.8611	10.5854	1.3035	1.72243
LGALS3BP	17	78971238	78979948	-	4079.63	654.259	389.477	453.292	4.5376e-15	4.0742e-12	3.3998	1.76545	3.3998	567.035	166.785	3.13596	3.68585
SHFL	19	10086122	10093253	+	226.203	37.7089	21.8764	25.1336	5.33979e-11	1.28273e-08	2.87756	1.52484	2.87756	28.682	9.9675	2.51537	3.29189
HLA-C	6	31268749	31272131	-	2649.8	424.159	249.543	294.422	9.90844e-16	1.47162e-12	3.98369	1.99411	3.98369	407.721	102.348	3.66967	4.32458
AC040162.1	16	67929614	67936018	-	125.952	24.3307	12.1011	13.9947	8.58069e-05	0.00284033	1.86337	0.897918	1.86337	12.0289	6.45546	1.45912	2.37963
CISH	3	50606490	50611832	-	60.1525	14.5468	5.442	6.68361	0.692191	0.850549	1.06044	0.0846674	1.06044	3.73514	3.52224	-1.30116	1.46321
CDK18	1	205504595	205532794	+	43.9316	9.78941	4.20058	4.88129	0.00258973	0.0324359	1.83072	0.872409	1.83072	4.14966	2.26669	1.30619	2.56587
ADAP1	7	897900	955408	-	85.5945	14.5668	8.2382	9.5105	1.35343e-06	9.92006e-05	2.7588	1.46404	2.7588	10.6701	3.86764	2.09807	3.62761
CLEC2B	12	9852984	9870137	-	12.8824	2.83625	1.21897	1.43138	0.0112994	0.0842902	2.24212	1.16486	2.24212	1.40346	0.625953	1.27124	3.9545
LGALS9	17	27629798	27649561	+	46.5827	7.85043	4.24051	5.17585	1.39229e-05	0.000685466	3.81766	1.93269	3.81766	7.03045	1.84156	2.36199	6.17044
RPS6KA5	14	90847861	91060642	-	25.826	5.78584	2.45423	2.86955	0.0210452	0.122205	1.59452	0.673122	1.59452	2.22156	1.39325	1.0675	2.38174
ZMYND15	17	4739833	4746120	+	17.1614	3.57636	1.65091	1.90682	0.0169219	0.106018	1.76513	0.819778	1.76513	1.60358	0.908474	1.12835	2.76129
NAMPT	7	106248298	106286327	-	917.51	199.926	86.0897	101.946	0.00524623	0.0515017	1.16175	0.216303	1.16175	62.6976	53.9681	1.05349	1.28114
DPYD	1	97077743	97995001	-	53.653	11.4362	5.18477	5.96144	0.00201174	0.0270353	1.60512	0.682681	1.60512	4.71304	2.93625	1.22793	2.09818
MAFF	22	38200767	38216508	+	88.6616	20.7448	8.12266	9.85129	0.468048	0.705411	1.10899	0.149243	1.10899	5.85929	5.28346	-1.25322	1.54128
LMO7	13	75620434	75859871	+	925.866	196.694	88.171	102.874	2.24997e-05	0.000991505	1.27439	0.349804	1.27439	68.518	53.7654	1.17031	1.38772
ERAP1	5	96760810	96808101	-	683.555	126.368	67.031	75.9506	1.23279e-08	1.86423e-06	2.13628	1.0951	2.13628	73.805	34.5483	1.84763	2.47002
NUB1	7	151341699	151378450	+	924.023	186.045	89.5084	102.669	8.07391e-08	9.43006e-06	1.47358	0.559327	1.47358	76.9095	52.1922	1.35377	1.604
AC008875.3	5	42983636	42993277	-	67.1336	14.6383	6.32032	7.45928	0.196277	0.446785	1.19542	0.257518	1.19542	4.78267	4.00082	-1.10801	1.58338
KIAA1614	1	180912897	180951615	+	27.7289	5.64827	2.68733	3.08099	0.0127397	0.0901571	1.57035	0.651086	1.57035	2.43784	1.55242	1.0999	2.24201
AC245297.4	1	149175748	149259988	+	33.9043	7.72073	3.27419	3.76715	0.00285488	0.0343547	1.90065	0.926492	1.90065	3.42247	1.80068	1.27129	2.84157
SHISAL1	22	44243665	44312952	-	24.2889	6.10591	2.03253	2.69876	0.0101554	0.078776	0.586372	-0.770113	-1.7054	0.962138	1.64083	-2.55455	-1.13852
CPM	12	68842197	68971571	-	103.563	24.6622	9.2842	11.507	0.0327748	0.159903	0.792776	-0.335015	-1.26139	5.35734	6.7577	-1.56411	-1.01726
FBXO6	1	11664200	11674355	+	64.5343	14.2179	5.93292	7.17048	0.809448	0.912113	0.94866	-0.0760372	-1.05412	3.88813	4.09855	-1.41061	1.26949
MOB3C	1	46607715	46616892	-	72.5706	14.0894	7.09163	8.0634	0.00155284	0.022488	1.50329	0.588125	1.50329	6.2751	4.17424	1.20343	1.87787
LINC01232	13	99486962	99499307	-	21.552	3.65965	1.97403	2.39467	0.000457992	0.009733	3.18325	1.6705	3.18325	3.06073	0.961511	1.694	5.98175
AL353807.5	1	155626757	155637605	-	102.913	19.0937	10.1411	11.4347	3.45558e-05	0.00140632	1.8636	0.898093	1.8636	10.4048	5.58318	1.48352	2.34106
CHKB-CPT1B	22	50568869	50582966	-	60.7043	11.5151	5.79623	6.74493	0.00741245	0.0642651	2.01258	1.00905	2.01258	6.48103	3.22026	1.30344	3.10753
TRIM38	6	25962802	25991232	+	278.949	50.136	27.697	30.9944	4.69402e-08	6.02091e-06	2.02251	1.01615	2.02251	30.0092	14.8376	1.74419	2.34524
ALPK1	4	112285509	112442622	+	148.044	33.8437	14.1887	16.4494	0.0836052	0.274057	1.21518	0.281166	1.21518	10.9961	9.049	-1.01808	1.50336
SQOR	15	45631148	45691282	+	458.8	95.2516	44.101	50.9778	0.0172051	0.106907	1.22735	0.295548	1.22735	34.3826	28.0137	1.03731	1.45221
LXN	3	158645822	158672649	-	68.8523	15.2787	6.31978	7.65026	0.403954	0.652118	0.883652	-0.17845	-1.13167	3.9703	4.49306	-1.47886	1.15475
ZNFX1	20	49237946	49278427	-	1851.79	363.827	183.208	205.755	1.04312e-07	1.18932e-05	1.61856	0.694708	1.61856	171.732	106.102	1.45431	1.80135
CXCL12	10	44370165	44386494	-	14.7267	3.22746	1.38426	1.6363	0.015584	0.101533	2.04723	1.03368	2.04723	1.6221	0.792337	1.0594	3.95617
BTN3A2	6	26365159	26378321	+	172.197	32.4321	17.1699	19.1331	1.16189e-06	8.92551e-05	1.88595	0.915295	1.88595	17.9518	9.51868	1.58699	2.24123
NAMPTP1	10	36521721	36524235	-	291.935	62.3699	27.7811	32.4372	0.396994	0.645657	1.07111	0.0991006	1.07111	20.0147	18.686	-1.13966	1.3075
CD47	3	108043091	108091863	-	407.177	87.7866	39.2892	45.2419	0.0341528	0.163057	1.14126	0.190627	1.14126	29.3803	25.7437	1.0097	1.28997
HLA-H	6	29887752	29890483	+	15.1929	2.70016	1.48184	1.6881	0.000795807	0.0143265	2.57903	1.36683	2.57903	1.94718	0.755004	1.56121	4.2604
CBR3	21	36135079	36146563	+	134.188	27.0374	13.2448	14.9098	0.00127474	0.0197125	1.48901	0.574357	1.48901	11.9122	8.00005	1.20876	1.83425
OGFR	20	62804835	62814001	+	1522.31	269.27	152.601	169.145	5.12043e-10	9.94056e-08	1.9205	0.941481	1.9205	162.018	84.3627	1.74203	2.11725
PMAIP1	18	59899996	59904306	+	166.905	34.2776	16.5204	18.545	0.000349021	0.00781003	1.54165	0.624474	1.54165	15.2444	9.88835	1.25859	1.88837
CASP7	10	113679162	113730908	+	364.417	67.2509	36.4099	40.4908	7.86247e-07	6.49151e-05	1.78999	0.839948	1.78999	37.0414	20.6937	1.5327	2.09047
CSF1	1	109910242	109930993	+	518.133	106.851	49.3013	57.5703	0.735476	0.874086	0.980945	-0.0277564	-1.01943	33.5988	34.2515	-1.15734	1.11365
CTSL	9	87726109	87731470	+	1415.44	318.563	136.46	157.271	0.203605	0.454186	1.08712	0.120515	1.08712	99.8455	91.8438	-1.05195	1.24323
PRDM1	6	105993463	106109940	+	13.1965	3.01923	1.27282	1.46627	0.133566	0.357785	1.62571	0.701074	1.62571	1.26221	0.776404	-1.10743	2.92688
PHF11	13	49495610	49528982	+	74.0468	13.9064	7.35715	8.22743	0.00306431	0.0360836	1.55809	0.639783	1.55809	6.8995	4.42817	1.20042	2.02234
PRKCG	19	53879190	53907653	+	11.7843	2.37881	1.13274	1.30936	0.607226	0.803087	1.21348	0.279155	1.21348	0.914146	0.753323	-1.42261	2.09486
BCO1	16	81238689	81291143	+	114.488	19.8253	11.4889	12.7209	1.56294e-06	0.000111155	2.15149	1.10534	2.15149	13.3747	6.21648	1.73323	2.67068
USP18	22	18150170	18177398	+	169.188	25.7306	16.8516	18.7986	1.92085e-09	3.24645e-07	2.75195	1.46045	2.75195	23.0846	8.38845	2.32946	3.25106
NCKAP5	2	132671788	133568464	-	17.7504	4.71029	1.561	1.97226	0.815745	0.914821	0.797404	-0.326618	-1.25407	0.994726	1.24746	-2.40761	1.53089
HLA-A	6	29941260	29945885	+	2261.11	370.347	221.274	251.235	2.7387e-14	1.81594e-11	3.37273	1.75392	3.37273	348.473	103.321	3.07998	3.69331
IL18R1	2	102311529	102398776	+	33.7841	5.87626	3.3645	3.75379	0.0038838	0.042365	1.89187	0.919815	1.89187	3.67043	1.9401	1.28483	2.78573
NFIX	19	12995608	13098797	+	604.487	100.92	61.3288	67.1652	1.05827e-10	2.37548e-08	2.08935	1.06305	2.08935	70.4716	33.729	1.8935	2.30545
RAB43	3	129087569	129122802	-	86.5151	18.7578	8.59654	9.61279	0.0333664	0.161069	1.25367	0.326154	1.25367	7.04616	5.62044	1.02178	1.53817
LHX9	1	197911902	197935479	+	17.5814	4.27367	1.67495	1.95349	0.829455	0.921289	0.95287	-0.0696494	-1.04946	1.15708	1.21431	-1.64846	1.49674
SOX7	8	10723768	10730512	-	10.2807	1.81792	1.00836	1.14231	0.00434296	0.0456897	2.40108	1.26368	2.40108	1.31195	0.5464	1.3265	4.34616
AC083862.2	7	135170816	135172415	+	14.8508	4.00657	1.46672	1.65009	0.0628693	0.232479	1.62143	0.69727	1.62143	1.46201	0.901675	-1.02788	2.70235
NFE2L3	7	26152198	26187138	+	298.051	57.8715	30.1979	33.1167	2.68862e-06	0.000176369	1.77353	0.826627	1.77353	31.3836	17.6955	1.50237	2.09364
GJD3	17	40360652	40364738	-	102.932	17.6405	10.4287	11.4369	2.00366e-06	0.000137726	2.10773	1.07569	2.10773	12.1745	5.77615	1.70762	2.60157
CACNG6	19	53992288	54012670	+	16.4162	3.48913	1.65086	1.82402	0.0134833	0.0938303	1.7816	0.833175	1.7816	1.73878	0.975967	1.14011	2.78402
MOV10	1	112673141	112700747	+	602.745	107.898	61.2555	66.9717	5.6103e-08	7.13253e-06	1.62628	0.701576	1.62628	60.0847	36.9461	1.46673	1.80319
UNC13A	19	17601328	17688366	-	24.8591	4.98593	2.44881	2.76212	0.00989046	0.0774968	1.95385	0.966322	1.95385	2.81307	1.43975	1.19447	3.19602
PAXIP1-AS2	7	154928460	154952189	+	78.2047	15.7015	7.84139	8.68941	0.00545888	0.0527032	1.56831	0.64921	1.56831	7.61896	4.85807	1.16294	2.11498
ADGRE1	19	6887566	6940460	+	76.8878	14.5124	7.78482	8.54309	0.00107058	0.0176346	1.60868	0.685879	1.60868	7.65756	4.76015	1.25627	2.05996
AL669918.1	6	32813767	32838823	-	138.197	29.1313	13.8628	15.3552	0.000750734	0.0138447	1.86165	0.896585	1.86165	15.2727	8.20383	1.36703	2.53525
ACTL8	1	17755333	17827064	+	16.2617	3.65044	1.61349	1.80686	0.0708361	0.24778	1.56585	0.646945	1.56585	1.59721	1.02003	-1.06495	2.61114
XRN1	3	142306607	142448063	-	279.184	54.7104	27.6664	31.0204	0.208695	0.459691	1.11714	0.159814	1.11714	21.4027	19.1584	-1.06823	1.33316
AL671277.1	6	29942075	29943068	-	59.1868	11.2011	5.65377	6.57631	2.4497e-06	0.000161932	3.49658	1.80594	3.49658	9.53346	2.72651	2.40086	5.09236
AC020915.5	19	58228914	58315184	+	48.184	8.92101	4.8417	5.35378	0.00132895	0.0201815	1.98295	0.98765	1.98295	5.57852	2.81324	1.384	2.84111
IL22RA1	1	24119771	24143141	-	111.208	19.4983	11.3593	12.3564	1.16304e-05	0.000590397	1.81431	0.859418	1.81431	12.1556	6.69989	1.48794	2.21225
GSDMD	8	143553207	143563063	+	404.458	72.2231	41.379	44.9398	1.32166e-07	1.43841e-05	1.64735	0.720144	1.64735	41.4293	25.1491	1.47135	1.84439
CCL2	17	34255218	34257204	+	396.16	102.21	36.5163	44.0178	0.0261025	0.139298	0.726394	-0.461176	-1.37666	21.6594	29.8176	-1.8568	-1.02068
ARID5B	10	61901684	62096945	+	50.7071	11.0702	4.88965	5.63413	0.922706	0.967707	0.964091	-0.0527586	-1.03725	3.49825	3.62855	-1.47789	1.37366
AC055716.2	12	52730425	52732866	+	15.1392	3.57636	1.47532	1.68213	0.44405	0.68588	1.17623	0.234165	1.17623	1.21907	1.03643	-1.45294	2.01015
EFCAB12	3	129401321	129428652	-	17.3153	4.1171	1.642	1.92393	0.502797	0.733516	0.833204	-0.263258	-1.20019	1.06409	1.2771	-1.91229	1.32757
SIX1	14	60643421	60658260	-	201.529	35.257	20.5761	22.3921	5.51364e-05	0.00200529	1.46955	0.555373	1.46955	19.2032	13.0674	1.27006	1.70038
GPR37	7	124743885	124765793	-	45.4413	9.7894	4.50668	5.04903	0.650816	0.82752	1.07362	0.102479	1.07362	3.43333	3.19791	-1.24802	1.43854
MT1XP1	1	16241213	16241399	-	39.878	9.7937	3.72058	4.43089	0.487819	0.721434	1.08218	0.113943	1.08218	3.03934	2.80853	-1.63958	1.92014
DNPEP	2	219373527	219400023	-	597.458	102.299	61.2596	66.3843	1.20259e-06	9.09285e-05	1.55607	0.637905	1.55607	59.643	38.3293	1.38245	1.75149
PLXNC1	12	94148577	94307676	+	37.7608	6.45471	3.71666	4.19564	7.521e-05	0.00259728	2.7463	1.45749	2.7463	5.41827	1.97293	1.82272	4.13788
RNF19B	1	32936445	32964686	-	280.559	55.0764	28.2037	31.1732	0.0749769	0.256815	1.11719	0.159871	1.11719	22.0537	19.7403	-1.01443	1.26612
CCDC68	18	54901509	54959462	-	107.595	19.7132	10.9719	11.9551	0.00347147	0.0395802	1.30496	0.384005	1.30496	9.51425	7.29084	1.10836	1.53644
SEMA3E	7	83363238	83649140	-	63.1634	13.2306	5.82962	7.01815	0.00942048	0.0752725	0.664281	-0.590134	-1.50539	3.27904	4.93623	-2.07374	-1.0928
PARP3	3	51942345	51948868	+	305.333	53.2951	31.3996	33.9259	5.26885e-06	0.000300366	1.51886	0.602988	1.51886	30.2653	19.9264	1.3365	1.7261
DIO2	14	80197526	80387758	-	14.203	2.37881	1.4539	1.57812	0.00586775	0.0554944	1.97806	0.984088	1.97806	1.6825	0.85058	1.26244	3.09935
RAB27A	15	55202966	55319114	-	80.4962	15.9436	7.89823	8.94402	0.411681	0.658184	0.913932	-0.129842	-1.09417	5.44857	5.96168	-1.38316	1.15531
SLC25A28	10	99610522	99620610	-	197.04	34.4915	20.2289	21.8934	0.000124182	0.00364081	1.49474	0.57989	1.49474	19.3369	12.9366	1.26929	1.76023
MT2A	16	56608584	56609498	+	1755.7	384.093	170.554	195.077	0.13729	0.363559	1.29548	0.373485	1.29548	155.731	120.211	-1.20821	2.0277
LIPT1	2	99154955	99163158	+	17.6535	3.3437	1.75651	1.96149	0.0693506	0.245106	1.46934	0.555168	1.46934	1.71845	1.16954	-1.14853	2.47963
ATF3	1	212565334	212620778	+	138.931	24.7935	14.2275	15.4368	0.00107941	0.0177424	1.48987	0.57519	1.48987	13.6641	9.17128	1.199	1.85132
ARNTL2	12	27332854	27425290	+	517.534	123.132	48.3058	57.5037	0.000434077	0.00925215	0.65914	-0.601343	-1.51713	26.9771	40.9278	-1.84177	-1.24971
MLKL	16	74671855	74700961	-	425.719	76.7594	43.4231	47.3022	0.000689059	0.0131113	1.23632	0.306052	1.23632	36.6236	29.6231	1.11217	1.37433
RHBDL3	17	32265832	32324660	+	34.198	7.12272	3.26503	3.79977	0.278648	0.536819	0.788271	-0.343236	-1.2686	2.07663	2.63441	-1.84231	1.14476
DRAM1	12	101877580	102012131	+	464.801	87.1631	46.7734	51.6446	0.336811	0.592291	1.04966	0.0699178	1.04966	35.4716	33.7935	-1.06319	1.1714
SLC2A12	6	133987581	134052625	-	13.0886	2.77147	1.1733	1.45429	0.0141673	0.0964582	0.53548	-0.901097	-1.86748	0.574861	1.07354	-3.08921	-1.12893
CHRM3	1	239386565	239915453	+	20.0479	4.36139	1.99917	2.22754	0.597739	0.797218	1.12489	0.169786	1.12489	1.61865	1.43894	-1.38653	1.75449
LINC00623	1	120913184	121009292	+	11.7544	2.55267	1.16049	1.30605	0.0351142	0.166047	1.88614	0.915433	1.88614	1.36923	0.725945	-1.00789	3.58556
COL27A1	9	114155537	114312512	+	286.418	57.6933	28.5281	31.8242	0.289968	0.546617	0.939617	-0.0898551	-1.06426	20.1613	21.4569	-1.204	1.06298
FAM117B	2	202634969	202769758	+	158.937	32.8842	15.9179	17.6597	0.987068	0.993918	0.997876	-0.00306721	-1.00213	11.7381	11.7631	-1.18951	1.18446
CXCL5	4	73995642	73998678	-	839.717	201.094	82.5858	93.3019	0.921752	0.967707	1.00046	0.000656681	1.00046	62.5174	62.489	-1.35313	1.35436
AC018653.3	12	7129079	7131199	-	21.8534	4.09561	2.14009	2.42815	0.192606	0.44215	1.46236	0.548297	1.46236	2.15788	1.47562	-1.23359	2.63802
STAT3	17	42313324	42388569	-	1871.73	363.99	185.744	207.97	0.00161731	0.0231187	0.880003	-0.18442	-1.13636	126.197	143.406	-1.21961	-1.05879
CRISPLD1	8	74984505	75034559	+	16.938	4.00657	1.65222	1.882	0.876584	0.946061	0.956329	-0.0644208	-1.04567	1.22133	1.2771	-1.73685	1.58846
SLFN11	17	35350305	35373702	-	281.564	48.9037	29.2257	31.2849	2.24333e-06	0.000151304	1.53853	0.621549	1.53853	28.8818	18.7724	1.36076	1.73952
DOCK4	7	111726110	112206408	-	179.047	37.2158	17.7772	19.8942	0.355751	0.611591	0.919559	-0.120986	-1.08748	12.5293	13.6254	-1.32747	1.12249
TAPBP	6	33299694	33314388	-	3075.41	543.423	319.654	341.712	1.19431e-08	1.84488e-06	1.60333	0.681069	1.60333	324.992	202.698	1.46647	1.75295
MAPK8IP2	22	50600793	50613982	+	136.645	26.4295	14.023	15.1827	0.0214984	0.123762	1.27569	0.351273	1.27569	12.2983	9.64053	1.04666	1.55482
CA11	19	48637946	48646188	-	106.596	21.2255	10.928	11.844	0.0438584	0.188757	1.23873	0.308867	1.23873	9.40911	7.59574	1.00526	1.52644
ENOX1	13	43213518	43786909	-	12.544	2.49302	1.2591	1.39378	0.486047	0.719703	1.13185	0.178678	1.13185	1.03661	0.915856	-1.48068	1.89686
RAB43P1	16	46626404	46626993	-	22.5538	4.46444	2.29008	2.50597	0.038993	0.176655	1.59755	0.675862	1.59755	2.39434	1.49875	1.00356	2.54311
FBLN5	14	91869412	91947988	-	31.7455	6.05433	3.12455	3.52728	0.915131	0.964546	1.06153	0.086151	1.06153	2.5078	2.36242	-1.49201	1.68128
WDR25	14	100376418	100530304	+	133.126	27.2569	13.3965	14.7918	0.623558	0.81311	0.960594	-0.0580017	-1.04102	9.74999	10.15	-1.23934	1.14359
OPTN	10	13099449	13138309	+	582.666	109.905	59.4728	64.7406	0.104874	0.312346	1.08946	0.123618	1.08946	47.0319	43.1697	-1.02242	1.21354
MAP3K8	10	30434021	30461834	+	113.872	18.6664	11.8465	12.6525	8.06556e-05	0.00269285	1.60614	0.683601	1.60614	12.1605	7.57123	1.33133	1.93769
HDX	X	84317874	84502480	-	18.2404	3.48913	1.88581	2.02671	0.0262258	0.139696	1.63027	0.705115	1.63027	1.96857	1.20751	1.0783	2.46479
B4GALNT3	12	459939	563510	+	12.4854	3.11072	1.10861	1.38726	0.136956	0.363139	0.585689	-0.771794	-1.70739	0.611211	1.04358	-3.25995	1.11826
SOD2	6	159669069	159762530	-	1030.25	205.782	104.299	114.473	0.816583	0.914985	0.989878	-0.0146775	-1.01023	77.4825	78.2748	-1.11057	1.0882
ABHD16A	6	31686955	31703357	-	240.923	43.3512	24.8801	26.7693	0.00297817	0.035356	1.26566	0.339895	1.26566	21.811	17.2328	1.09543	1.46235
SLC12A7	5	1050384	1112064	-	1760.63	304.414	182.156	195.626	3.23222e-05	0.00133049	1.27223	0.347357	1.27223	160.031	125.788	1.16581	1.38836
AP000295.1	21	33229901	33297161	+	75.2223	17.0602	7.56461	8.35803	0.280795	0.539548	1.18967	0.250558	1.18967	6.50941	5.47163	-1.20716	1.7085
ADAR	1	154582057	154628014	-	5339.91	891.531	557.665	593.323	5.25302e-10	1.0062e-07	1.64555	0.718566	1.64555	581.555	353.412	1.52734	1.7729
MDGA1	6	37630679	37699307	-	377.783	88.6528	33.8384	41.9759	2.76702e-07	2.72267e-05	0.477172	-1.06742	-2.09568	15.5531	32.5943	-2.50017	-1.75664
HSBP1L1	18	79964582	79970823	+	105.143	21.1009	10.6135	11.6825	0.684519	0.846675	0.962092	-0.0557539	-1.0394	7.76316	8.06904	-1.25158	1.15849
TMCC3	12	94567122	94650558	-	17.0278	3.40191	1.74335	1.89198	0.0327697	0.159903	1.6722	0.741752	1.6722	1.8797	1.12408	1.03966	2.6896
LYPD1	2	132643286	132671580	-	59.4335	11.7986	6.03828	6.60372	0.116094	0.330123	1.31474	0.394781	1.31474	5.56711	4.23437	-1.10024	1.90182
CLDN23	8	8701937	8704097	+	191.376	36.4145	19.7481	21.264	0.0207302	0.120886	1.25047	0.322467	1.25047	17.2874	13.8247	1.04548	1.49564
FRMD4B	3	69168782	69542584	-	36.0689	7.85043	3.71141	4.00765	0.0384497	0.175194	1.43221	0.518245	1.43221	3.59091	2.50725	1.01021	2.03049
SYNE2	14	63761899	64226434	+	423.052	73.6303	43.5873	47.0057	0.0280905	0.145265	1.19082	0.251959	1.19082	36.9254	31.0083	1.02925	1.37776
IL15	4	141636583	141733988	+	61.8955	11.4362	6.38626	6.87728	0.0712035	0.248581	1.33035	0.411807	1.33035	5.88244	4.42172	-1.00167	1.77279
TRIM25	17	56836387	56914081	-	1859.19	326.659	194.349	206.577	3.57189e-07	3.33207e-05	1.48727	0.57267	1.48727	191.172	128.539	1.34892	1.63982
NUCB1	19	48900312	48923373	+	3003.83	574.364	303.169	333.759	0.0367675	0.170899	0.912197	-0.132582	-1.09625	215.262	235.982	-1.19425	-1.0063
A1BG	19	58345178	58353493	-	37.8737	6.13812	4.08312	4.20818	0.00187111	0.0255834	0.601902	-0.7324	-1.6614	3.35159	5.56834	-2.21771	-1.24464
A1BG-AS1	19	58347718	58355456	+	56.3005	8.0721	6.19363	6.25561	0.120859	0.337728	0.824457	-0.278484	-1.21292	5.87058	7.12055	-1.55934	1.05993
A1CF	10	50799409	50885676	-	211.191	38.6987	20.9184	23.4657	0.261674	0.520044	1.22772	0.29598	1.22772	32.0745	26.1253	-1.21828	1.8363
A2M-AS1	12	9065163	9068690	+	10.2739	2.18646	1.04206	1.14154	0.719349	0.865277	0.997836	-0.00312484	-1.00217	1.26546	1.2682	-2.09596	2.0869
A4GALT	22	42692121	42721299	-	174.16	22.9405	19.2455	19.3511	0.798847	0.90671	0.97205	-0.0408978	-1.02875	18.6595	19.196	-1.23466	1.1666
AAAS	12	53307456	53324865	-	760.871	101.174	83.9641	84.5412	8.25332e-06	0.000447423	1.27871	0.354686	1.27871	98.6993	77.1868	1.18205	1.38327
AACS	12	125065434	125143334	+	471.342	67.2089	51.8304	52.3713	7.49193e-05	0.00259611	0.738794	-0.436756	-1.35356	45.7812	61.9675	-1.52571	-1.20083
AADAC	3	151814073	151828489	+	37.1452	5.96261	3.9767	4.12725	0.00645193	0.0584048	0.604492	-0.726205	-1.65428	2.95005	4.88022	-2.33037	-1.17434
AADACP1	3	151770428	151784895	+	84.5651	10.0431	9.37255	9.39612	0.710345	0.859643	0.968403	-0.046321	-1.03263	9.52926	9.84018	-1.2446	1.16719
AADAT	4	170060222	170091700	-	59.1555	7.49841	6.51586	6.57283	0.756623	0.886377	0.958299	-0.0614524	-1.04352	6.66081	6.95066	-1.35872	1.24776
AAGAB	15	67200667	67255196	-	547.343	65.1863	60.7587	60.8159	0.106837	0.315416	1.07512	0.104495	1.07512	62.5091	58.1416	-1.01825	1.17697
AAK1	2	69457997	69674350	-	728.573	101.092	79.1006	80.9525	0.0086657	0.0713418	0.859565	-0.218322	-1.16338	84.7223	98.5642	-1.29881	-1.04207
AAMDC	11	77821109	77918433	+	30.7694	3.88476	3.3924	3.41883	0.418806	0.664487	0.885678	-0.175146	-1.12908	3.08533	3.48358	-1.53766	1.20618
AAMP	2	218264123	218270258	-	1088.34	139.887	120.436	120.927	0.57844	0.78469	1.02806	0.0399197	1.02806	116.547	113.367	-1.07997	1.14142
AAR2	20	36236459	36270919	+	447.045	53.3343	49.59	49.6717	0.939207	0.973145	0.9968	-0.00462442	-1.00321	50.6775	50.8402	-1.11809	1.11095
AARS1	16	70252298	70289507	-	2308.31	299.337	254.875	256.479	0.000572794	0.0114767	1.18794	0.248461	1.18794	293.398	246.981	1.09179	1.29255
AARS2	6	44298731	44313348	-	216.534	26.4696	24.0077	24.0594	0.0627761	0.232194	1.12663	0.172018	1.12663	25.5496	22.6778	-1.00801	1.27947
AARSD1	17	42950526	42964499	-	177.276	22.0083	19.6534	19.6973	0.820079	0.917047	0.980727	-0.0280765	-1.01965	19.6224	20.008	-1.18702	1.14171
AASDH	4	56338287	56387509	-	40.3474	4.98593	4.44682	4.48304	0.772764	0.895212	1.04272	0.0603509	1.04272	4.67122	4.47984	-1.29215	1.40491
AASDHPPT	11	106075501	106098700	+	235.109	29.0856	26.0663	26.1233	0.464595	0.702714	1.04452	0.0628368	1.04452	26.747	25.607	-1.10005	1.20017
AATF	17	36948954	37056872	+	1198.32	144.501	132.972	133.147	0.557682	0.771985	0.977724	-0.0325009	-1.02278	128.048	130.965	-1.10974	1.06085
ABALON	20	31721507	31723410	+	105.911	14.9669	11.5127	11.7679	0.655098	0.83002	1.03967	0.0561267	1.03967	13.6094	13.0901	-1.1433	1.23581
ABAT	16	8674596	8784576	+	13.5624	2.33296	1.41792	1.50693	0.10433	0.311408	0.674178	-0.568799	-1.48329	1.34053	1.9884	-2.61731	1.18961
ABCA1	9	104781006	104928156	-	53.9719	10.028	5.31097	5.99688	2.82546e-07	2.76126e-05	0.308529	-1.69652	-3.24118	2.64487	8.57251	-4.31053	-2.43711
ABCA11P	4	425435	474130	-	11.8638	1.92839	1.26536	1.3182	0.954535	0.981453	1.09218	0.127208	1.09218	1.25804	1.15187	-1.61702	1.92886
ABCA12	2	214931542	215138627	-	85.2219	16.4422	8.85363	9.4691	0.000152952	0.00425012	0.503805	-0.989062	-1.98489	7.09542	14.0837	-2.64698	-1.48841
ABCA2	9	137007234	137028923	-	670.615	85.7604	74.2894	74.5128	0.0858848	0.278641	0.926971	-0.109404	-1.07878	74.9049	80.8061	-1.17677	1.01117
ABCA3	16	2275881	2340747	-	1220.73	158.55	133.988	135.636	2.74122e-06	0.000179002	0.718909	-0.476118	-1.391	108.36	150.728	-1.53135	-1.26351
ABCA5	17	69244311	69327245	-	19.0886	2.80067	2.01474	2.12096	0.666538	0.836119	0.911095	-0.134327	-1.09758	2.33708	2.56514	-1.74614	1.44946
ABCA7	19	1039997	1065573	+	239.57	32.9048	26.4072	26.6189	0.679749	0.844308	0.97403	-0.0379626	-1.02666	27.909	28.6532	-1.2055	1.1437
ABCB1	7	87503017	87713324	-	313.292	44.3108	34.0248	34.8102	0.00188044	0.0256546	1.33276	0.414418	1.33276	35.309	26.4931	1.13717	1.56199
ABCB10	1	229516582	229558708	-	357.173	44.3206	39.5245	39.6858	0.488113	0.721795	0.963933	-0.0529959	-1.03742	41.014	42.5487	-1.1602	1.07801
ABCB6	2	219209772	219218995	-	644.134	88.836	70.6856	71.5705	0.000925758	0.0159275	1.24948	0.32133	1.24948	85.6331	68.5349	1.11162	1.40445
ABCB7	X	75051048	75156733	-	173.642	21.6321	19.216	19.2935	0.215374	0.467593	1.10226	0.14046	1.10226	20.5696	18.6614	-1.06659	1.29588
ABCB8	7	151028422	151047783	+	582.638	71.9024	64.6189	64.7375	0.514764	0.740981	1.03523	0.0499459	1.03523	66.8764	64.6008	-1.07725	1.15448
ABCB9	12	122920951	122981650	-	82.6513	11.9716	9.0723	9.18348	0.0607242	0.22795	0.823886	-0.279483	-1.21376	8.9156	10.8214	-1.48977	1.01124
ABCC1	16	15949577	16143075	+	5105.21	722.49	560.564	567.245	0.853872	0.934964	1.01055	0.0151462	1.01055	512.189	506.84	-1.10162	1.125
ABCC10	6	43427366	43450428	+	165.328	21.5358	18.3008	18.3698	0.879133	0.946607	0.99358	-0.00929151	-1.00646	18.9032	19.0254	-1.1826	1.16747
ABCC2	10	99782640	99852595	+	3437.91	414.535	380.996	381.99	0.0292417	0.148598	1.11624	0.158651	1.11624	400.268	358.585	1.01145	1.2319
ABCC3	17	50634777	50692254	+	4478.79	597.697	494.032	497.643	0.0505319	0.205591	0.859867	-0.217815	-1.16297	469.183	545.646	-1.35218	-1.00024
ABCC4	13	95019835	95301476	-	1028.07	134.517	113.73	114.23	0.0896584	0.284963	0.903712	-0.146066	-1.10655	112.138	124.086	-1.24458	1.01644
ABCC5	3	183919934	184017940	-	198.65	24.5728	22.0358	22.0723	0.669513	0.837916	0.9694	-0.0448353	-1.03157	21.6731	22.3572	-1.18588	1.11441
ABCC6	16	16148928	16223523	-	51.3333	9.3948	5.30099	5.7037	0.15781	0.393048	1.39369	0.478908	1.39369	7.17218	5.14619	-1.20961	2.3495
ABCC8	11	17392498	17476880	-	20.3853	2.77732	2.23521	2.26503	0.286664	0.543906	0.828065	-0.272184	-1.20763	2.11081	2.54909	-1.77615	1.21789
ABCD1	X	153724856	153744756	+	75.7816	10.7507	8.28227	8.42018	0.0553772	0.2161	0.778579	-0.361085	-1.28439	7.06375	9.07263	-1.67185	1.01345
ABCD3	1	94418389	94518667	+	483.832	67.2322	53.1962	53.7591	0.216921	0.469436	1.07586	0.105485	1.07586	60.594	56.3216	-1.04691	1.21177
ABCD4	14	74285269	74303056	-	167.92	22.9484	18.4138	18.6577	0.898487	0.956452	1.0043	0.00619307	1.0043	17.039	16.966	-1.20608	1.21648
ABCE1	4	145098288	145129525	+	792.029	95.4252	87.8485	88.0033	0.110817	0.32155	1.07774	0.108011	1.07774	89.8625	83.3804	-1.02245	1.1876
ABCF1	6	30571393	30597180	+	904.902	109.688	100.435	100.545	0.250108	0.506634	1.04896	0.0689658	1.04896	101.102	96.3827	-1.03865	1.14285
ABCF2	7	151207837	151227206	-	1318.72	160.973	146.289	146.524	0.465842	0.703689	1.03133	0.0445008	1.03133	145.685	141.259	-1.06383	1.13153
ABCF3	3	184186023	184194013	+	305.446	36.6816	33.9064	33.9384	0.708412	0.858316	1.02058	0.0293909	1.02058	33.896	33.2124	-1.09593	1.14151
ABCG1	21	42199689	42297245	+	11.0347	2.4051	1.10757	1.22608	0.360071	0.615319	1.37614	0.460624	1.37614	1.40996	1.02458	-1.55411	2.9431
ABCG2	4	88090150	88231629	-	400.626	54.0254	44.1884	44.5139	0.141615	0.370284	1.09302	0.128326	1.09302	49.7163	45.485	-1.02998	1.23052
ABHD1	2	27123789	27130813	+	10.4801	1.66643	1.12386	1.16445	0.923527	0.967707	0.958717	-0.0608236	-1.04306	1.21495	1.26727	-1.86462	1.71385
ABHD10	3	111979010	111993369	+	191.794	24.9216	21.1693	21.3104	0.373498	0.625953	1.06307	0.0882361	1.06307	23.4681	22.0758	-1.08045	1.22104
ABHD11	7	73736094	73738868	-	174.688	22.6221	19.3244	19.4098	0.522003	0.746252	0.946589	-0.0791906	-1.05643	19.1731	20.2549	-1.25528	1.12477
ABHD12	20	25294742	25390836	-	1231.41	146.705	136.602	136.823	0.829727	0.921448	1.01162	0.0166655	1.01162	138.15	136.564	-1.09589	1.1215
ABHD13	13	108218392	108234244	+	100.454	12.3679	11.0966	11.1615	0.200617	0.451705	1.12485	0.169726	1.12485	11.9171	10.5944	-1.09366	1.38378
ABHD14A	3	51971426	51981200	+	111.263	14.934	12.2608	12.3626	0.0466194	0.195315	1.17578	0.233618	1.17578	14.3207	12.1798	1.00288	1.37849
ABHD14A-ACY1	3	51974706	51989184	+	27.6567	5.20967	2.79712	3.07297	0.960025	0.983891	0.978866	-0.0308161	-1.02159	3.63783	3.71637	-1.71305	1.64141
ABHD14B	3	51968510	51983410	-	378.904	45.7514	42.0487	42.1005	0.121799	0.339233	1.08116	0.112583	1.08116	44.3649	41.0344	-1.02309	1.1959
ABHD15	17	29560547	29567038	-	363.716	49.6877	40.0215	40.4129	0.148093	0.379707	0.914235	-0.129363	-1.09381	41.7577	45.675	-1.23989	1.03633
ABHD17A	19	1876810	1885548	-	669.297	79.6172	74.269	74.3664	0.662877	0.834244	1.02003	0.0286066	1.02003	74.873	73.403	-1.08687	1.13084
ABHD17AP1	1	148146395	148149567	+	22.3674	3.19552	2.39283	2.48526	0.155805	0.390491	0.771514	-0.374235	-1.29615	1.99249	2.58257	-2.03841	1.21333
ABHD17B	9	71862452	71910932	-	122.676	15.0646	13.6104	13.6307	0.34392	0.599461	1.0762	0.105941	1.0762	14.1738	13.1703	-1.08724	1.25924
ABHD17C	15	80679684	80755622	+	247.884	31.4838	27.4131	27.5427	0.00456889	0.0473385	1.22177	0.288975	1.22177	30.3834	24.8683	1.0751	1.38845
ABHD18	4	127965306	128039928	+	55.5924	7.25337	6.13121	6.17694	0.0643337	0.23589	1.23135	0.300238	1.23135	7.09098	5.75871	-1.01959	1.54592
ABHD2	15	89087459	89202356	+	2298.17	303.004	254.446	255.352	0.00880502	0.0720757	0.871792	-0.197944	-1.14706	243.499	279.309	-1.26337	-1.04147
ABHD3	18	21650901	21704781	-	86.97	10.88	9.63916	9.66334	0.191864	0.441223	1.11964	0.16303	1.11964	10.443	9.32717	-1.06839	1.33932
ABHD4	14	22598237	22613216	+	974.774	131.751	107.156	108.308	0.00475366	0.0485177	0.805257	-0.312479	-1.24184	101.783	126.398	-1.42876	-1.07937
ABHD5	3	43690108	43734372	+	89.3577	13.7319	9.80977	9.92863	0.0216588	0.124311	0.762445	-0.391295	-1.31157	8.80696	11.5509	-1.63317	-1.0533
ABHD6	3	58237532	58295694	+	100.346	13.5556	11.0595	11.1496	0.087946	0.282406	1.18944	0.250282	1.18944	12.4465	10.4642	-1.03553	1.46503
ABHD8	19	17292131	17310237	-	69.9395	10.6592	7.52091	7.77106	0.975193	0.989934	0.995037	-0.00717804	-1.00499	8.79207	8.83592	-1.33984	1.32658
ABI1	10	26746593	26861088	-	356.635	44.7753	39.4942	39.6261	0.200894	0.451932	1.08003	0.111073	1.08003	42.4711	39.3239	-1.04778	1.22221
ABI2	2	203328239	203447729	+	435.723	51.6209	48.3116	48.4137	0.732247	0.873346	1.0167	0.0238972	1.0167	50.4785	49.6492	-1.09149	1.12825
ABITRAM	9	108934400	108950745	+	100.303	12.7398	11.1214	11.1448	0.248516	0.504976	1.10377	0.14244	1.10377	11.7355	10.6322	-1.07691	1.312
ABL1	9	130713016	130887676	+	1245	154.576	138.055	138.333	0.00665695	0.0598085	1.1146	0.156532	1.1146	150.013	134.589	1.03593	1.19926
ABL2	1	179099330	179229685	-	536.521	73.6609	59.0877	59.6134	0.0120704	0.0872235	0.829541	-0.269614	-1.20549	56.7805	68.4481	-1.38374	-1.05019
ABLIM1	10	114431113	114768062	-	1603.24	230.334	173.338	178.137	0.0741843	0.25551	1.1076	0.147434	1.1076	214.461	193.627	-1.01377	1.24366
ABLIM3	5	149141483	149260543	+	85.7445	14.8214	8.93007	9.52717	1.39213e-05	0.000685466	0.468596	-1.09358	-2.13403	6.63014	14.149	-2.75267	-1.65443
ABR	17	1003518	1229739	-	2056.51	281.16	226.385	228.502	0.00096723	0.0164831	0.847873	-0.23808	-1.17942	225.668	266.158	-1.28521	-1.08234
ABRACL	6	139028745	139043303	+	100.787	12.5926	11.1656	11.1985	0.181575	0.427802	0.890525	-0.167271	-1.12293	10.5443	11.8406	-1.34237	1.06455
ABRAXAS1	4	83459517	83523349	-	52.9061	7.45146	5.82492	5.87845	0.595172	0.795741	0.942347	-0.0856691	-1.06118	5.47988	5.81514	-1.38969	1.23407
ABRAXAS2	10	124801819	124836668	+	166.317	20.2473	18.3916	18.4797	0.677277	0.842914	1.03153	0.0447832	1.03153	18.5815	18.0136	-1.16417	1.23874
ABT1	6	26596953	26600740	+	221.811	27.6548	24.5656	24.6457	0.164518	0.403116	1.10119	0.139063	1.10119	25.956	23.5709	-1.05185	1.27549
ABTB1	3	127672935	127680927	+	82.5099	10.604	9.04919	9.16776	0.703043	0.855642	1.04365	0.0616344	1.04365	9.85694	9.4447	-1.24608	1.35723
ABTB2	11	34150987	34358011	-	333.269	46.0305	36.0766	37.0299	0.31356	0.568762	1.07673	0.10666	1.07673	43.662	40.5505	-1.09179	1.26577
AC000089.1	22	19792294	19793095	+	11.5495	1.92036	1.26155	1.28328	0.84822	0.931288	0.966294	-0.0494658	-1.03488	1.16006	1.20053	-1.68186	1.57039
AC000093.1	22	19717220	19724773	+	21.8643	3.06298	2.36723	2.42936	0.873276	0.943979	0.972083	-0.040849	-1.02872	2.45997	2.53062	-1.61566	1.52671
AC000123.3	7	127359785	127364760	-	20.8478	3.34272	2.24524	2.31642	0.370697	0.624391	0.834545	-0.260937	-1.19826	2.32242	2.78285	-1.82461	1.27078
AC002056.1	22	50754675	50755435	-	70.6864	9.20684	7.8025	7.85405	0.374783	0.626892	1.1042	0.143004	1.1042	7.96594	7.21421	-1.13788	1.38737
AC002075.2	7	93669826	93670078	-	13.3429	1.9967	1.42546	1.48254	0.173011	0.415075	0.743192	-0.428193	-1.34555	1.38701	1.86629	-2.23755	1.23588
AC002094.1	17	28357647	28381698	+	18.9367	4.04767	1.36887	2.10408	0.434024	0.677664	0.928754	-0.106632	-1.07671	2.17002	2.33648	-5.92748	5.11295
AC002116.1	19	36008638	36014236	-	12.8008	2.56168	1.29047	1.42231	0.0253797	0.136866	0.517972	-0.949053	-1.9306	1.11789	2.1582	-3.39172	-1.09892
AC002310.5	16	30526918	30528295	+	13.7096	2.33296	1.48715	1.52329	0.482593	0.717126	0.832349	-0.26474	-1.20142	1.49459	1.79563	-1.92193	1.33152
AC002524.1	X	14244382	14244929	+	10.6559	1.77752	1.12701	1.18398	0.362789	0.617514	0.762563	-0.391071	-1.31137	1.0459	1.37156	-2.44797	1.4235
AC002996.1	12	111753890	111791419	+	24.1456	7.87432	1.54359	2.68284	0.379733	0.630286	0.687384	-0.540812	-1.45479	3.09091	4.49663	-3.66609	1.73221
AC003681.1	22	29978950	30028237	-	11.9189	2.00754	1.27492	1.32432	0.406016	0.654417	0.804793	-0.313311	-1.24256	1.17235	1.45672	-2.18428	1.41474
AC004057.1	4	113214046	113217171	-	1238.7	154.578	137.418	137.633	0.33782	0.593377	1.04683	0.0660235	1.04683	142.256	135.893	-1.05238	1.15324
AC004069.1	4	105137280	105140620	-	10.7834	1.60456	1.1731	1.19816	0.306981	0.561899	1.26245	0.336228	1.26245	1.22451	0.96995	-1.30107	2.07362
AC004224.1	16	3496201	3496769	+	63.9329	8.58086	7.05225	7.10366	0.996449	0.998696	0.982816	-0.0250068	-1.01748	7.17089	7.29627	-1.3136	1.26884
AC004263.2	12	120218070	120222669	+	19.3327	3.02446	2.11596	2.14807	0.434339	0.678009	0.846755	-0.239983	-1.18098	1.99671	2.35807	-1.7756	1.27309
AC004264.1	22	30246205	30246999	+	13.697	2.56804	1.42129	1.52189	0.129475	0.350357	1.63673	0.710814	1.63673	1.8584	1.13543	-1.11801	2.99502
AC004453.1	7	44467897	44468305	+	97.0787	11.4341	10.7784	10.7865	0.883899	0.948681	1.01071	0.0153664	1.01071	10.8219	10.7072	-1.17178	1.19701
AC004678.1	19	2013728	2014657	-	9.86879	1.44425	1.06599	1.09653	0.664284	0.835316	1.08444	0.116948	1.08444	1.15356	1.06374	-1.65011	1.94054
AC004706.3	17	6628619	6640457	-	18.036	2.70855	1.89815	2.004	0.63803	0.82059	0.891835	-0.165152	-1.12128	2.1555	2.41693	-1.86474	1.48316
AC004803.1	12	974133	991191	-	12.166	1.92136	1.30122	1.35177	0.420991	0.666294	0.802219	-0.317932	-1.24654	1.25699	1.56689	-2.16719	1.39471
AC004812.2	12	120116907	120119001	+	25.4628	3.55665	2.80834	2.8292	0.869919	0.942757	1.03367	0.0477787	1.03367	2.94904	2.85298	-1.35998	1.45311
AC004816.1	14	70809841	70815995	+	31.507	5.2377	3.25648	3.50078	0.802962	0.909011	0.956813	-0.0636906	-1.04514	4.20488	4.39467	-1.43881	1.31722
AC004890.2	7	149285281	149297313	+	23.8912	3.80651	2.55293	2.65457	0.655417	0.830164	0.868704	-0.203064	-1.15114	2.65264	3.05356	-1.85397	1.39909
AC004918.5	7	141662922	141663847	-	15.3042	2.66623	1.52721	1.70046	0.18175	0.427968	0.696529	-0.521745	-1.43569	1.6819	2.41469	-2.59884	1.26083
AC004922.1	7	99325879	99394654	+	32.2463	5.69394	2.75138	3.58292	0.772597	0.89514	0.801693	-0.318877	-1.24736	2.66189	3.32033	-3.87231	2.48878
AC004943.2	16	72665123	72822782	+	95.6585	16.5834	10.4061	10.6287	0.0966218	0.298135	1.28659	0.363547	1.28659	12.6601	9.84005	-1.01819	1.68542
AC004951.1	7	44004046	44007867	-	10.7157	2.00599	1.1169	1.19063	0.750737	0.88301	0.983547	-0.0239338	-1.01673	1.31372	1.3357	-1.95594	1.8921
AC004967.2	7	97966377	97970405	-	18.2433	2.62506	1.98248	2.02703	0.138981	0.365882	1.35034	0.433325	1.35034	2.24476	1.66237	-1.13054	2.06146
AC004980.1	7	76549360	76627983	+	45.9669	6.49372	5.03636	5.10744	0.914419	0.964401	1.0056	0.00805587	1.0056	5.09417	5.0658	-1.37557	1.39101
AC004997.1	22	30285238	30299483	-	15.3458	2.91304	1.56646	1.70509	0.0847671	0.276388	0.591895	-0.756588	-1.68949	1.25693	2.12357	-3.18509	1.11586
AC005000.1	X	115718942	115719230	-	52.4426	7.09918	5.7278	5.82695	0.0324034	0.158927	1.33954	0.421735	1.33954	6.34067	4.73347	1.01829	1.76214
AC005041.5	2	74465339	74472962	+	11.2527	2.34193	1.15849	1.2503	0.477747	0.712775	1.25111	0.323203	1.25111	1.50376	1.20195	-1.56783	2.45407
AC005062.1	7	19918981	20140454	-	159.592	20.9552	17.6356	17.7324	0.211659	0.46359	1.11081	0.151606	1.11081	18.2865	16.4624	-1.07689	1.32876
AC005077.4	7	76071469	76074964	-	158.429	28.2166	14.6735	17.6032	0.340697	0.596013	0.900402	-0.151358	-1.11061	22.198	24.6534	-1.41407	1.14642
AC005229.4	7	148696467	148698665	-	31.8147	4.48304	3.49822	3.53496	0.890972	0.952713	1.01041	0.0149377	1.01041	3.45705	3.42144	-1.37902	1.40787
AC005261.1	19	57304305	57308563	+	41.0717	5.46601	4.51196	4.56352	0.05506	0.215356	1.30015	0.378683	1.30015	5.04903	3.8834	-1.01706	1.71924
AC005324.3	17	15571491	15651654	-	12.2982	2.52858	1.19071	1.36647	0.0129051	0.0910584	2.59837	1.37761	2.59837	1.85647	0.714474	1.32133	5.10965
AC005329.1	19	1392170	1396468	-	15.3228	2.31649	1.63908	1.70253	0.882495	0.948229	0.979387	-0.0300485	-1.02105	1.85503	1.89408	-1.70372	1.63421
AC005332.5	17	68133201	68135936	+	56.0928	8.62279	6.06824	6.23253	0.0111962	0.0838168	0.662633	-0.593718	-1.50913	4.92769	7.43654	-2.04355	-1.11447
AC005332.6	17	68126666	68129587	+	182.316	24.3229	20.1029	20.2573	0.00710018	0.0624187	0.812858	-0.298924	-1.23023	19.0639	23.4529	-1.41935	-1.0663
AC005336.1	19	15910582	15911825	-	65.4264	8.09899	7.2339	7.26959	0.0630223	0.232805	1.21282	0.27836	1.21282	7.77756	6.41281	-1.01265	1.48953
AC005523.2	19	4791745	4795560	-	359.134	49.1235	39.7056	39.9038	0.194109	0.444253	1.10614	0.145529	1.10614	42.5132	38.434	-1.0521	1.28728
AC005538.2	2	233865496	233867360	-	86.802	15.0655	9.07192	9.64467	0.37683	0.627946	0.84213	-0.247886	-1.18747	9.25832	10.9939	-1.97191	1.39844
AC005540.1	2	190880797	190882060	-	104.255	19.8761	11.0156	11.5839	0.842053	0.927885	0.94255	-0.0853591	-1.06095	12.8522	13.6356	-1.50745	1.33922
AC005562.1	17	30576464	30672790	+	67.1145	12.2946	7.17984	7.45717	0.0510429	0.206825	0.725021	-0.463904	-1.37927	6.96383	9.605	-1.87892	-1.01249
AC005606.2	16	1984877	1990478	-	18.0746	3.30991	1.94199	2.00829	0.153717	0.387474	1.40585	0.49144	1.40585	2.42316	1.72363	-1.1298	2.23295
AC005670.3	17	46983287	47100324	-	249.653	36.068	27.1867	27.7392	0.00567822	0.0542016	0.803794	-0.315102	-1.2441	27.4609	34.1641	-1.44123	-1.07393
AC005726.1	17	28455752	28614186	-	12.1446	2.26374	1.26054	1.3494	0.617841	0.809846	0.767382	-0.381982	-1.30313	1.0455	1.36242	-2.44056	1.43718
AC005726.2	17	28633206	28635951	+	18.1766	2.65845	1.96163	2.01962	0.907197	0.961537	1.02187	0.0312127	1.02187	2.22837	2.18068	-1.53571	1.60362
AC005822.1	17	16616848	16617882	-	50.3126	7.22546	5.5109	5.59029	0.688792	0.849008	1.05896	0.0826492	1.05896	6.06771	5.72987	-1.27311	1.42766
AC005832.4	12	4604944	4662644	+	26.4351	5.10934	2.38094	2.93723	0.627315	0.814545	0.86073	-0.216367	-1.1618	2.76869	3.21667	-3.4757	2.57499
AC005833.1	12	4649101	4774185	+	77.0157	10.2136	8.48581	8.55729	0.300098	0.554567	0.889026	-0.169703	-1.12483	8.16477	9.18395	-1.43296	1.13256
AC005912.1	12	3211663	3211918	-	71.0516	9.28178	7.84827	7.89463	0.553932	0.77058	0.940718	-0.0881654	-1.06302	7.88846	8.38557	-1.3347	1.18114
AC005943.1	19	1578339	1605446	-	70.3397	9.71221	7.60898	7.81552	0.827462	0.920374	1.01584	0.0226673	1.01584	7.79759	7.67603	-1.43847	1.48439
AC006001.3	7	66526088	66592398	-	89.2158	11.6328	9.82592	9.91287	0.470348	0.707171	1.06718	0.0938054	1.06718	11.0437	10.3485	-1.12938	1.28622
AC006001.4	7	66553805	66554200	-	33.4065	4.76143	3.64372	3.71183	0.171598	0.413431	0.809241	-0.305359	-1.23573	3.34172	4.12945	-1.77148	1.16009
AC006058.1	3	44117299	44122366	+	82.4293	11.97	8.95384	9.15881	0.00487053	0.0491362	0.715882	-0.482206	-1.39688	6.91582	9.66055	-1.7404	-1.12116
AC006058.4	3	44115818	44117488	-	35.9127	4.94643	3.94994	3.9903	0.629151	0.815509	0.931387	-0.102548	-1.07367	3.6776	3.94853	-1.46213	1.26837
AC006064.6	12	6556886	6607368	-	55.6294	7.98085	5.82446	6.18105	0.410272	0.657468	0.903874	-0.145806	-1.10635	7.0836	7.83693	-1.43537	1.17268
AC006128.1	19	15398696	15400357	+	19.11	2.59942	2.09169	2.12333	0.844275	0.928965	1.03257	0.0462329	1.03257	2.16555	2.09726	-1.47625	1.57396
AC006210.2	X	27517884	27519760	+	14.8629	2.22187	1.62875	1.65143	0.838733	0.926793	1.02548	0.0362983	1.02548	1.74165	1.69838	-1.52161	1.60014
AC006333.1	7	123749068	123751167	+	16.4249	2.56804	1.77561	1.82499	0.753273	0.884795	0.947984	-0.0770654	-1.05487	1.82574	1.92592	-1.71892	1.54475
AC006449.7	17	38702452	38704748	+	15.6842	2.51442	1.69221	1.74269	0.817419	0.915494	0.946698	-0.0790244	-1.0563	1.80387	1.90544	-1.72549	1.54644
AC006453.3	2	89542842	89585653	-	156.587	22.3335	17.2643	17.3985	0.0921941	0.289626	0.855792	-0.224668	-1.16851	16.6605	19.4679	-1.39964	1.02506
AC006486.2	19	42242775	42244974	+	12.3406	1.96783	1.33686	1.37117	0.141679	0.370335	1.43063	0.516655	1.43063	1.65157	1.15443	-1.14018	2.33362
AC006504.5	19	27793431	27984985	+	176.529	23.3941	19.5259	19.6144	0.847058	0.930837	1.01964	0.0280601	1.01964	20.3735	19.9811	-1.16125	1.20731
AC006511.4	12	8080381	8082164	-	19.1582	2.92774	2.09968	2.12869	0.734771	0.873867	1.05896	0.0826535	1.05896	2.16259	2.04217	-1.4244	1.59733
AC006538.1	19	2727743	2729328	-	20.1963	3.06101	2.1798	2.24403	0.407624	0.655246	0.873277	-0.195489	-1.14511	2.33556	2.67448	-1.71656	1.30907
AC007068.1	12	9695384	9696228	+	500.225	63.6795	55.3902	55.5806	0.0609179	0.228188	1.11681	0.159386	1.11681	57.0306	51.0655	-1.00395	1.2522
AC007098.1	2	62957326	63048641	-	19.6274	2.91278	2.11835	2.18082	0.308212	0.563618	0.831955	-0.265422	-1.20199	1.88973	2.27143	-1.89824	1.31387
AC007182.2	14	75595805	75596207	-	23.5611	3.78145	2.55616	2.6179	0.197096	0.44735	1.32393	0.404824	1.32393	2.89964	2.19018	-1.12899	1.97887
AC007191.1	19	45714387	45717382	-	22.8138	3.44385	2.40936	2.53487	0.782939	0.900382	0.928067	-0.1077	-1.07751	2.69167	2.9003	-1.77484	1.52868
AC007192.1	19	18153158	18178118	+	166.794	33.735	17.5131	18.5327	0.406318	0.654696	1.13922	0.188047	1.13922	15.6624	13.7483	-1.16236	1.50853
AC007238.1	2	58460292	58462033	-	339.703	42.8377	37.674	37.7448	0.198209	0.448561	1.07273	0.101288	1.07273	38.1943	35.6048	-1.04242	1.19956
AC007318.1	2	65205108	65205989	+	647.495	76.5923	71.7854	71.9439	0.00436944	0.0458495	1.13879	0.1875	1.13879	74.7184	65.6122	1.04892	1.23635
AC007318.3	2	65203502	65227606	-	290.164	36.4052	32.1217	32.2405	0.00263986	0.032637	1.20814	0.272785	1.20814	35.15	29.0943	1.07985	1.35166
AC007406.5	12	273954	277124	-	20.2588	3.62673	2.14474	2.25098	0.81545	0.914643	1.0119	0.0170679	1.0119	2.54444	2.51451	-1.61483	1.6535
AC007485.2	17	54956760	54958427	-	20.3844	2.87855	2.23537	2.26493	0.501559	0.732875	0.891952	-0.164962	-1.12114	2.0546	2.30348	-1.65986	1.32055
AC007613.1	16	11741910	11744507	+	11.6097	1.96788	1.23594	1.28996	0.662341	0.833934	1.14761	0.198631	1.14761	1.35226	1.17833	-1.5801	2.08101
AC007686.3	14	77028086	77031573	+	15.7168	2.35947	1.68794	1.74631	0.29558	0.55068	1.22447	0.292161	1.22447	2.10203	1.71668	-1.32307	1.98373
AC007743.1	2	56173534	56185871	-	13.31	2.44668	1.33691	1.47889	0.074132	0.255481	0.644645	-0.633424	-1.55124	1.41178	2.19001	-2.64377	1.09866
AC007906.2	16	53035690	53052874	-	16.6634	3.25238	1.70696	1.85149	0.226534	0.480954	0.706023	-0.502212	-1.41638	1.68157	2.38174	-2.64839	1.32014
AC007952.1	17	19155727	19159112	-	13.464	2.12143	1.29042	1.496	0.21228	0.463891	0.740939	-0.432574	-1.34964	1.28671	1.73659	-3.38766	1.85979
AC007996.1	18	26542971	26545792	-	81.3292	12.5538	8.74892	9.03658	0.0123875	0.0888015	1.31489	0.394937	1.31489	11.7358	8.92536	1.07076	1.61466
AC008038.1	7	133034607	133035921	-	6459.88	785.151	715.61	717.764	0.000835964	0.0148082	0.878643	-0.186651	-1.13812	645.337	734.471	-1.21594	-1.06528
AC008105.3	17	45190931	45222223	-	50.9744	8.66367	5.3061	5.66382	0.00250379	0.0316354	1.8746	0.906586	1.8746	6.94329	3.70387	1.26339	2.78152
AC008124.1	12	45718046	45727776	-	28.3722	4.26351	3.06287	3.15246	0.793966	0.90403	1.04508	0.0636119	1.04508	3.69133	3.53211	-1.31552	1.4368
AC008267.5	7	66493607	66495759	+	12.7323	2.18646	1.37313	1.4147	0.279711	0.538	1.30975	0.389293	1.30975	1.6819	1.28414	-1.27483	2.1869
AC008403.3	19	48547637	48597239	-	12.2405	2.08474	1.23914	1.36005	0.871729	0.943601	1.07216	0.100523	1.07216	1.66169	1.54985	-1.79488	2.06327
AC008429.1	5	172954786	172959393	-	9.55495	1.4816	1.02594	1.06166	0.370523	0.62438	0.816314	-0.292805	-1.22502	0.991543	1.21466	-2.20561	1.46975
AC008429.2	5	172975511	172976375	+	172.562	28.725	18.2679	19.1735	0.082916	0.272621	1.13768	0.186092	1.13768	15.8339	13.9178	-1.01522	1.31401
AC008443.1	5	181246507	181272168	+	22.2184	3.55352	2.39953	2.46871	0.553429	0.770254	1.09596	0.132196	1.09596	2.72819	2.48931	-1.42395	1.71035
AC008481.1	19	11523436	11523832	+	46.4413	6.31283	5.08079	5.16014	0.773687	0.895612	1.03805	0.0538781	1.03805	5.23149	5.03972	-1.34895	1.45356
AC008608.2	5	134005147	134005563	+	10.0955	1.66643	1.05811	1.12172	0.0790503	0.264903	0.610465	-0.71202	-1.6381	0.923773	1.51323	-2.94435	1.09726
AC008695.1	5	131425891	131796984	-	26.096	5.70685	2.47901	2.89955	0.407487	0.655246	1.70698	0.771447	1.70698	3.53823	2.0728	-1.35051	3.93508
AC008735.2	19	55661901	55674716	-	17.167	2.93818	1.83961	1.90744	0.296477	0.55159	0.812903	-0.298845	-1.23016	1.4713	1.80993	-1.90332	1.25773
AC008735.4	19	55612490	55613098	-	10.0362	1.89726	1.06802	1.11513	0.058167	0.222064	0.589525	-0.762374	-1.69628	0.875847	1.48568	-2.9105	1.01152
AC008738.7	19	33207129	33207640	+	62.445	8.76275	6.79449	6.93833	0.79148	0.903021	0.9525	-0.0702093	-1.04987	6.96317	7.31041	-1.48095	1.3436
AC008771.1	5	80411231	80488096	-	44.7684	7.24513	4.80411	4.97427	0.745141	0.879556	0.93875	-0.0911872	-1.06525	5.46658	5.82325	-1.47853	1.30295
AC008878.3	19	7382834	7470242	+	31.7931	13.3543	2.11043	3.53257	0.0236931	0.131341	0.276718	-1.85351	-3.61379	2.01898	7.29618	-10.2002	-1.28032
AC008894.2	19	16123661	16139893	-	87.2152	14.0269	9.15963	9.69058	0.00349293	0.0397618	1.67039	0.740189	1.67039	13.5495	8.11153	1.2062	2.31322
AC008894.3	19	16074293	16077396	-	179.346	23.9074	19.7118	19.9273	0.367839	0.622204	1.06198	0.0867608	1.06198	22.4617	21.1507	-1.07917	1.21709
AC008915.3	16	23452758	23457607	+	19.711	3.73991	2.04629	2.19011	0.0891141	0.284013	0.63658	-0.651586	-1.57089	1.62573	2.55385	-2.73596	1.1087
AC008966.1	5	53109816	53127674	+	40.729	6.32119	4.44581	4.52544	0.962009	0.984901	1.03482	0.0493768	1.03482	4.99766	4.82951	-1.31938	1.41285
AC009005.1	19	567210	572229	-	14.0405	2.18646	1.49357	1.56005	0.150576	0.382592	1.43348	0.519519	1.43348	1.96359	1.36981	-1.17612	2.41676
AC009022.1	16	69976297	70065949	-	28.8351	4.62243	3.1421	3.2039	0.936846	0.972365	0.969871	-0.0441348	-1.03106	3.40713	3.51297	-1.47576	1.38817
AC009053.2	16	74332402	74368241	-	48.9554	6.56601	5.39245	5.43949	0.734851	0.873867	0.965027	-0.0513594	-1.03624	5.30365	5.49586	-1.37788	1.28319
AC009061.2	16	67481314	67505978	+	10.7283	2.4051	1.0665	1.19204	0.944549	0.976145	1.17023	0.226794	1.17023	1.36741	1.1685	-1.93941	2.6559
AC009088.2	16	31182511	31183286	-	13.3783	2.43667	1.41468	1.48648	0.269007	0.527368	1.37749	0.462038	1.37749	1.86717	1.35549	-1.26071	2.39216
AC009090.6	16	57177349	57181391	+	13.4426	1.91189	1.44249	1.49362	0.212672	0.464324	1.30447	0.383464	1.30447	1.56531	1.19996	-1.27434	2.16847
AC009093.9	16	29075022	29104163	+	15.511	3.07206	1.55518	1.72344	0.000317987	0.0073268	2.76492	1.46724	2.76492	2.7146	0.981802	1.7388	4.39658
AC009113.1	16	89215211	89217654	-	11.1055	2.07794	1.18096	1.23394	0.199048	0.449529	0.664653	-0.589327	-1.50454	1.02765	1.54614	-2.64853	1.17003
AC009120.2	16	74305127	74335347	-	23.8273	3.66306	2.59411	2.64748	0.335625	0.591098	1.22446	0.292142	1.22446	2.9695	2.42515	-1.21746	1.82533
AC009126.1	5	96814028	96935810	-	21.3826	3.44385	2.26721	2.37585	0.867111	0.941139	0.944157	-0.082902	-1.05915	2.68028	2.83881	-1.60865	1.434
AC009133.1	16	29808636	29821253	-	82.9888	13.6877	8.94419	9.22097	0.221204	0.47494	1.18484	0.244694	1.18484	8.61278	7.26914	-1.09752	1.54076
AC009133.6	16	29812261	29820093	+	203.265	30.588	22.1155	22.585	0.5098	0.737869	1.10277	0.141136	1.10277	24.7855	22.4756	-1.21201	1.47393
AC009237.14	2	95525109	95526703	-	14.7304	2.09205	1.58563	1.63671	0.647169	0.825132	0.869528	-0.201696	-1.15005	1.44878	1.66617	-1.9303	1.45946
AC009245.1	7	137721985	137722847	+	64.2996	8.72382	7.07252	7.1444	0.0217435	0.124548	1.30742	0.386724	1.30742	8.20135	6.27292	1.03841	1.64612
AC009275.1	7	134368737	134432535	-	45.0219	6.23363	4.86183	5.00243	0.555306	0.771278	1.08515	0.117888	1.08515	5.83617	5.37824	-1.26004	1.48375
AC009299.1	2	161281902	161282619	+	40.0004	6.34055	4.31095	4.44449	0.0881932	0.282822	1.40498	0.490546	1.40498	5.39849	3.84241	-1.0308	2.03476
AC009302.1	2	221944223	221944613	+	38.787	5.15747	4.28097	4.30966	0.153476	0.387068	1.19792	0.260532	1.19792	4.91041	4.09911	-1.08442	1.55616
AC009303.4	2	118014174	118015674	+	10.844	1.74919	1.16985	1.20488	0.590299	0.792323	0.91003	-0.136013	-1.09886	1.28239	1.40917	-1.8326	1.51768
AC009403.1	7	155611231	155645206	-	32.8463	4.59146	3.59128	3.64959	0.205756	0.45672	1.23445	0.303872	1.23445	4.02533	3.26082	-1.14521	1.74516
AC009404.1	2	117833937	117841659	+	12.6663	1.91907	1.35751	1.40736	0.037092	0.171798	1.65313	0.725198	1.65313	1.61321	0.97585	1.03747	2.63414
AC009412.1	7	6329412	6348960	-	97.6493	12.879	10.7862	10.8499	0.583038	0.787217	1.05008	0.0705026	1.05008	11.7057	11.1474	-1.1515	1.26973
AC009506.2	2	159615296	159617083	+	20.7375	3.3921	2.22318	2.30417	0.0841194	0.274897	1.42504	0.511003	1.42504	2.95082	2.07069	-1.06957	2.17201
AC009533.1	12	9277235	9313242	+	84.3184	11.6782	9.27451	9.36871	0.126833	0.345877	1.20207	0.265518	1.20207	10.3405	8.6023	-1.05677	1.52699
AC009690.2	15	72278867	72351795	+	31.9456	4.39616	3.49264	3.54951	0.184517	0.431582	1.22428	0.291929	1.22428	3.82637	3.12542	-1.15457	1.73054
AC009779.3	12	55729104	55730853	+	55.5123	6.99646	6.14095	6.16803	0.910415	0.96297	1.01466	0.0210031	1.01466	6.47156	6.37803	-1.24228	1.27898
AC009779.4	12	55716036	55724704	+	33.077	6.38468	3.47016	3.67522	0.00164701	0.0234035	1.94373	0.958828	1.94373	5.22274	2.68697	1.35092	2.79667
AC010132.3	7	42909273	42932175	-	91.487	12.1239	10.0504	10.1652	0.567232	0.778714	0.938115	-0.092163	-1.06597	10.4855	11.1772	-1.3383	1.17778
AC010186.2	12	9648047	9658413	+	12.5516	1.82397	1.3271	1.39463	0.619663	0.81106	0.874386	-0.193657	-1.14366	1.40041	1.6016	-2.07442	1.586
AC010198.2	12	30795458	30879269	+	44.566	7.90508	4.66151	4.95178	0.0249992	0.135925	0.622595	-0.683634	-1.60618	4.11863	6.61526	-2.46346	-1.04723
AC010226.1	5	115602057	115623898	+	11.3821	1.76847	1.20476	1.26468	0.647594	0.825422	0.921293	-0.118268	-1.08543	1.17345	1.2737	-2.02474	1.71856
AC010326.4	19	57867885	57868835	+	17.5906	2.22136	1.93738	1.95451	0.296052	0.551132	1.21155	0.27685	1.21155	2.21429	1.82766	-1.21185	1.77881
AC010327.6	19	55227219	55230280	-	32.8546	4.77753	3.58215	3.65051	0.818059	0.915782	1.04414	0.0623105	1.04414	4.11784	3.94378	-1.311	1.42928
AC010342.1	5	24170370	24171247	+	33.2746	5.1032	3.65346	3.69718	0.165076	0.403933	1.22941	0.29797	1.22941	4.35164	3.53961	-1.08813	1.64466
AC010343.1	5	33162179	33162808	+	264.597	32.3618	29.3474	29.3996	0.933687	0.970984	1.00066	0.000945688	1.00066	29.4025	29.3832	-1.14039	1.14189
AC010422.3	19	12643831	12648398	-	31.0595	4.75197	3.38415	3.45105	0.131527	0.353772	0.772221	-0.372915	-1.29497	3.0349	3.93009	-1.85191	1.10434
AC010422.8	19	12668071	12681835	-	20.0671	3.14094	2.18988	2.22968	0.653426	0.829031	1.12287	0.167194	1.12287	2.35628	2.09844	-1.36027	1.71509
AC010442.1	5	466124	473099	-	102.841	14.8177	11.2758	11.4267	0.900686	0.957872	0.986913	-0.0190045	-1.01326	12.2066	12.3685	-1.27212	1.23905
AC010522.1	19	57819719	57858942	+	10.7623	2.25403	1.00324	1.19581	0.146149	0.376692	1.76398	0.818831	1.76398	1.88485	1.06852	-1.22762	3.81987
AC010618.3	19	17488990	17511890	-	10.1824	2.28902	1.05165	1.13137	0.0521689	0.209489	0.5297	-0.916753	-1.88786	0.819004	1.54617	-3.4773	-1.02494
AC010624.5	19	50136859	50148231	-	75.6719	10.595	8.28135	8.40799	0.410063	0.657468	0.892028	-0.164839	-1.12104	7.54931	8.46309	-1.48121	1.17862
AC010642.2	19	58309727	58327249	-	87.6927	11.6953	9.68259	9.74364	0.972326	0.988426	0.989557	-0.0151452	-1.01055	9.72763	9.83029	-1.26902	1.24266
AC010653.2	16	71859680	71860677	+	11.0587	2.10414	1.14524	1.22875	0.35547	0.611285	0.759736	-0.396429	-1.31625	1.22335	1.61024	-2.40249	1.38672
AC010761.1	17	28721487	28722878	-	14.1784	2.1869	1.53424	1.57538	0.825899	0.919187	1.08828	0.122045	1.08828	1.51038	1.38786	-1.48959	1.76419
AC010789.1	10	101701994	101730038	-	12.489	2.31495	1.30128	1.38767	0.558203	0.772334	1.30716	0.386438	1.30716	1.4332	1.09642	-1.43669	2.45483
AC010878.1	2	37816915	37817962	+	16.7997	2.71033	1.79201	1.86663	0.815898	0.914821	0.983512	-0.0239852	-1.01676	1.87399	1.90541	-1.75914	1.70161
AC010969.2	2	9936360	9939591	+	42.5318	6.45481	4.62636	4.72576	0.490643	0.724194	1.11327	0.154805	1.11327	4.43182	3.98089	-1.21417	1.50481
AC010973.2	7	151074742	151076531	-	23.5663	3.74601	2.58328	2.61848	0.0893076	0.284225	1.3462	0.428889	1.3462	3.12887	2.32423	-1.04342	1.89094
AC011005.1	7	129126518	129130794	+	78.4246	10.4458	8.67519	8.71384	0.192894	0.442458	0.876005	-0.190988	-1.14155	8.1064	9.25383	-1.40306	1.07669
AC011445.1	19	39314651	39320859	-	46.4032	7.80354	5.03053	5.15591	0.964711	0.985353	0.987922	-0.0175308	-1.01223	4.65549	4.7124	-1.4252	1.39098
AC011447.1	19	20125044	20125485	+	105.95	15.0465	11.6284	11.7722	0.509385	0.737684	0.931825	-0.101869	-1.07316	10.5325	11.3031	-1.3424	1.16561
AC011462.5	19	41307397	41310413	-	14.6821	2.44867	1.5356	1.63135	0.13059	0.352752	1.45605	0.54206	1.45605	2.1745	1.49342	-1.16365	2.46702
AC011497.2	19	42485076	42485715	-	43.266	5.93307	4.75129	4.80733	0.451493	0.692224	0.905245	-0.143619	-1.10467	4.59453	5.07546	-1.50481	1.23315
AC011603.3	12	49127782	49188485	+	90.2152	18.7994	9.41178	10.0239	0.817328	0.915494	1.21875	0.285403	1.21875	11.3963	9.35078	-1.36776	2.0316
AC011611.3	12	76030494	76031379	+	33.7344	4.93433	3.66428	3.74826	0.968494	0.986625	0.980973	-0.0277149	-1.0194	4.05918	4.13791	-1.44516	1.39069
AC011611.5	12	76057538	76058116	+	10.2925	1.92846	1.06899	1.14361	0.453369	0.693695	0.763591	-0.389129	-1.3096	0.953416	1.2486	-2.581	1.5049
AC011815.1	18	35280867	35290202	-	13.3949	2.13888	1.44429	1.48833	0.368957	0.623214	1.23261	0.301712	1.23261	1.80875	1.46742	-1.3112	1.99213
AC012073.1	2	24825610	24826718	+	27.059	4.46365	2.9389	3.00655	0.0450436	0.191718	1.47595	0.561647	1.47595	3.61931	2.45218	1.03372	2.10738
AC012085.1	12	93640822	93641587	-	1002.17	120.854	111.083	111.352	0.114295	0.327329	1.0788	0.109422	1.0788	112.369	104.162	-1.02167	1.18902
AC012146.1	17	5111468	5115005	+	10.3795	1.76685	1.10826	1.15328	0.309348	0.564537	0.761595	-0.392904	-1.31303	1.11723	1.46696	-2.24011	1.29932
AC012184.2	16	70299194	70372583	+	59.9176	11.5082	6.21689	6.65751	0.125562	0.344241	1.31546	0.395567	1.31546	9.07098	6.89567	-1.04	1.79966
AC012306.2	2	127886556	127887186	+	18.5646	3.03726	1.89125	2.06273	0.868473	0.941763	1.0257	0.0366019	1.0257	2.3316	2.27319	-1.89485	1.99348
AC012313.1	19	58404238	58408485	-	113.817	15.1774	12.5619	12.6464	0.161318	0.39847	0.882568	-0.180221	-1.13306	12.4184	14.0708	-1.36294	1.06163
AC012313.2	19	58357999	58359604	+	17.2674	2.60212	1.87692	1.9186	0.555591	0.771395	1.13654	0.184652	1.13654	2.099	1.84683	-1.38397	1.78771
AC012313.8	19	58440448	58445850	+	14.4575	2.61999	1.53748	1.60638	0.192204	0.441652	0.7182	-0.477543	-1.39237	1.45305	2.02318	-2.33177	1.20275
AC012360.3	2	105334027	105337476	-	15.3183	2.40398	1.60922	1.70203	0.0207592	0.120886	1.7598	0.815412	1.7598	2.02227	1.14915	1.06081	2.91936
AC012459.1	2	200390666	200478019	-	15.6386	2.81763	1.60767	1.73762	0.694665	0.852093	1.14165	0.191117	1.14165	1.54115	1.34993	-1.58021	2.05958
AC012467.2	3	53858994	53861577	-	14.8491	2.55514	1.58905	1.6499	0.477385	0.712458	0.853574	-0.228411	-1.17154	1.71675	2.01124	-1.8702	1.3626
AC012510.1	2	218633256	218634015	-	21.6514	4.10614	2.32837	2.40571	0.85183	0.934081	0.942849	-0.0849014	-1.06062	2.09224	2.21906	-1.6437	1.46119
AC012513.3	2	216211404	216213520	+	64.0697	8.58086	7.06693	7.11885	0.489771	0.723543	0.925329	-0.111962	-1.0807	7.27862	7.86598	-1.34566	1.1522
AC012615.1	19	1874871	1876170	-	15.4391	2.56804	1.66569	1.71545	0.377697	0.628373	1.2055	0.269636	1.2055	1.95517	1.62187	-1.36389	1.98206
AC012615.6	19	1822089	1824543	+	9.87654	1.9208	1.03335	1.09739	0.43927	0.682591	1.35899	0.442533	1.35899	1.33697	0.9838	-1.42214	2.62649
AC012618.1	19	12260126	12260538	+	15.8019	2.26797	1.73086	1.75577	0.704609	0.856403	1.07487	0.104163	1.07487	1.71356	1.5942	-1.42888	1.65085
AC012676.1	16	4335870	4337819	-	21.5428	3.79541	2.29227	2.39365	0.600285	0.798773	0.925064	-0.112376	-1.08101	2.45069	2.64921	-1.78532	1.52778
AC013470.3	7	12471352	12472546	+	14.1122	2.07714	1.5094	1.56803	0.183511	0.430349	1.32728	0.408474	1.32728	1.77575	1.33789	-1.27916	2.25346
AC013489.1	15	88459501	88546586	-	19.9589	3.21237	2.06141	2.21765	0.469976	0.706833	1.17684	0.234915	1.17684	2.83841	2.41189	-1.3836	1.91622
AC013489.3	15	88477871	88478388	-	25.0786	4.7658	2.65856	2.78651	0.690024	0.849433	1.196	0.258214	1.196	3.16488	2.64623	-1.39446	1.99465
AC015712.2	15	100892343	100919392	-	57.5361	10.0562	6.19131	6.3929	0.00950528	0.0755617	0.667643	-0.58285	-1.49781	5.57975	8.35737	-1.98882	-1.12802
AC015813.1	17	57989039	57994851	-	48.7327	8.02298	5.28438	5.41474	0.582212	0.786613	1.12082	0.164551	1.12082	5.55597	4.95707	-1.28262	1.61127
AC015813.2	17	57989038	58007247	-	41.399	8.45073	3.94226	4.59989	0.0135925	0.0941511	0.472574	-1.08139	-2.11607	2.93054	6.20123	-4.50527	1.00615
AC015813.5	17	58006674	58008188	+	18.8454	3.82055	1.97428	2.09393	0.502995	0.733516	0.833148	-0.263356	-1.20027	2.23571	2.68345	-1.87979	1.30483
AC015813.6	17	58095672	58101480	+	57.8925	7.76169	6.39649	6.43249	0.929594	0.969389	0.99993	-0.000101298	-1.00007	6.44189	6.44234	-1.28515	1.28497
AC015849.5	17	35893707	35911652	-	17.1313	2.76557	1.83517	1.90348	0.635229	0.81907	1.12942	0.175579	1.12942	2.27443	2.01381	-1.39347	1.77748
AC015849.6	17	35861093	35861567	-	57.5796	7.25015	6.37168	6.39773	0.173759	0.416036	1.15682	0.210159	1.15682	6.65993	5.75712	-1.07537	1.43909
AC015871.3	15	79920195	79922456	-	16.3196	2.71033	1.74908	1.81329	0.150002	0.382011	0.735528	-0.443149	-1.35957	1.70142	2.3132	-2.13097	1.15286
AC015911.4	17	35459481	35460551	-	38.3889	5.23475	4.23132	4.26543	0.854425	0.935176	1.02596	0.0369762	1.02596	4.43155	4.31941	-1.31335	1.38243
AC015922.3	17	15789016	15789706	+	15.1305	2.07714	1.66062	1.68116	0.580357	0.785733	1.11222	0.153438	1.11222	1.74808	1.57171	-1.39339	1.72366
AC016026.1	22	17787652	17811498	-	53.2314	7.53206	5.81933	5.9146	0.249279	0.505739	1.19916	0.262023	1.19916	6.30641	5.25903	-1.13747	1.63566
AC016027.1	22	18076527	18078885	-	21.1786	3.12975	2.28296	2.35318	0.313504	0.568762	1.2636	0.33754	1.2636	2.74134	2.16947	-1.23537	1.97249
AC016065.1	8	6403551	6407143	-	35.3657	5.01483	3.84897	3.92952	0.611357	0.806275	1.05678	0.0796722	1.05678	4.29693	4.06607	-1.35957	1.51834
AC016582.2	19	37779686	37792866	+	85.8257	10.765	9.49456	9.53618	0.687238	0.84796	0.96282	-0.0546624	-1.03862	9.34129	9.70201	-1.28378	1.19009
AC016588.2	19	248551	251572	-	15.7495	2.17297	1.69255	1.74995	0.549691	0.766537	1.14727	0.198206	1.14727	2.03668	1.77524	-1.41398	1.86112
AC016629.3	19	58575445	58601317	+	74.8805	10.4692	8.13287	8.32006	0.98488	0.993193	1.00041	0.000591635	1.00041	9.07914	9.07542	-1.34323	1.34433
AC016687.1	4	33968174	33968527	+	16.0817	2.67108	1.72638	1.78685	0.13349	0.357651	1.37874	0.463348	1.37874	1.85063	1.34226	-1.1377	2.16268
AC016705.2	15	80344853	80404215	-	91.4773	13.8862	10.0449	10.1641	0.288456	0.545447	0.872778	-0.196314	-1.14577	9.91098	11.3557	-1.45571	1.10888
AC016727.1	2	61471188	61484131	+	23.0892	3.75921	2.47804	2.56547	0.610928	0.805857	1.15841	0.212148	1.15841	2.73935	2.36474	-1.38825	1.86292
AC016734.1	2	63622178	63622832	-	232.039	29.3006	25.7083	25.7821	0.050696	0.206083	1.1358	0.183709	1.1358	27.7974	24.4739	-1.0023	1.29302
AC016738.1	2	100993676	101002245	-	9.64664	1.96045	1.00673	1.07185	0.576267	0.783423	1.28567	0.362515	1.28567	1.27116	0.988715	-1.52622	2.52274
AC016739.1	2	176200908	176201253	-	2645.04	313.511	293.465	293.894	0.153738	0.387474	0.940468	-0.0885497	-1.0633	282.318	300.189	-1.16219	1.02793
AC016747.1	2	61141592	61144970	-	145.942	18.3297	16.1343	16.2157	0.588872	0.791364	0.954775	-0.0667676	-1.04737	16.4918	17.2729	-1.24401	1.13404
AC016876.2	17	7581964	7584087	-	39.4481	5.21347	4.3522	4.38313	0.349351	0.605259	1.12824	0.174076	1.12824	4.69964	4.16546	-1.17899	1.50077
AC016876.3	17	7572826	7582025	+	179.578	25.408	19.6577	19.9531	0.574039	0.782711	0.930799	-0.103458	-1.07435	17.952	19.2867	-1.35225	1.17158
AC017083.3	2	68131238	68261231	-	41.9848	7.3497	4.48905	4.66498	0.267037	0.525298	1.19065	0.251753	1.19065	4.41469	3.70779	-1.20881	1.71367
AC017100.1	18	31685655	31686824	+	10.3767	1.67168	1.09669	1.15296	0.12812	0.348067	0.629438	-0.667864	-1.58872	0.901736	1.4326	-2.87872	1.14053
AC018629.1	17	40473554	40475290	-	61.1828	8.49406	6.6647	6.79809	0.291764	0.547917	1.12935	0.17549	1.12935	8.01857	7.10018	-1.12831	1.43908
AC018630.2	12	10845849	11171601	-	15.578	2.28319	1.67907	1.73088	0.985613	0.993483	0.973819	-0.0382739	-1.02688	1.73683	1.78352	-1.72584	1.63665
AC018638.2	7	128652841	128653244	+	14.1694	2.17297	1.53576	1.57437	0.0419946	0.183987	1.56301	0.644324	1.56301	1.9018	1.21676	1.0077	2.42432
AC018638.4	7	128651185	128652335	+	67.6661	9.73484	7.41329	7.51845	0.688925	0.849026	1.05467	0.0767913	1.05467	8.15283	7.73022	-1.25096	1.39148
AC018638.5	7	128653969	128654723	+	38.3668	5.57202	4.16853	4.26298	0.444172	0.685979	1.12516	0.170135	1.12516	4.86179	4.32096	-1.25484	1.58863
AC018645.3	7	32758882	32759354	+	9.98416	1.85991	1.01084	1.10935	0.202207	0.45317	1.35731	0.440751	1.35731	1.48882	1.09689	-1.45652	2.68334
AC018647.2	7	35695214	35699414	+	75.7308	9.93761	8.35746	8.41453	0.422866	0.667478	0.907875	-0.139435	-1.10147	8.1265	8.95112	-1.39169	1.14708
AC018665.1	17	76090308	76091670	+	10.491	2.11078	1.08674	1.16567	0.187905	0.436943	0.638098	-0.648151	-1.56716	0.830782	1.30197	-2.92627	1.19149
AC018755.3	19	51594561	51606151	+	12.0205	2.10434	1.29991	1.33561	0.818378	0.915927	0.92846	-0.107088	-1.07705	1.23733	1.33266	-1.83498	1.58182
AC018809.2	3	9958717	9962540	+	22.5081	3.49828	2.44426	2.50091	0.581683	0.78629	1.12239	0.166573	1.12239	2.72352	2.42654	-1.36956	1.72531
AC019069.1	2	74832655	74833988	-	10.3699	1.60269	1.04496	1.15222	0.0377923	0.173514	1.78228	0.83372	1.78228	1.43453	0.804884	-1.13485	3.60485
AC019080.1	2	177283508	177392692	-	17.5834	3.20697	1.83049	1.95371	0.352172	0.607578	0.759133	-0.397575	-1.31729	1.91646	2.52454	-2.2381	1.28978
AC019205.1	6	73263212	73301790	+	30.7949	4.82667	3.26807	3.42166	0.0769515	0.260789	1.37449	0.4589	1.37449	4.41219	3.21005	-1.10301	2.08384
AC019257.8	8	1763888	1958628	+	67.6671	15.7071	6.82744	7.51857	0.941058	0.974289	0.836788	-0.257066	-1.19505	7.29541	8.71835	-2.25172	1.57669
AC020688.1	8	127086263	127087511	-	54.4311	6.93011	6.01265	6.0479	0.573248	0.781958	1.07125	0.0992892	1.07125	5.95002	5.5543	-1.18313	1.35772
AC020763.4	16	70661667	70665837	+	99.72	17.1935	10.6066	11.08	0.027493	0.143415	0.790558	-0.339057	-1.26493	11.4828	14.5249	-1.54306	-1.03693
AC020904.2	19	18022403	18032100	+	164.158	20.9302	18.1742	18.2398	0.273644	0.53124	0.922796	-0.115916	-1.08366	18.1397	19.6574	-1.25896	1.07207
AC020915.1	19	58278966	58315198	+	34.1655	5.4144	3.51165	3.79617	0.064744	0.236771	0.685549	-0.544669	-1.45869	3.53727	5.15977	-2.38569	1.12122
AC020915.3	19	58257270	58278809	-	31.4762	4.73394	3.4258	3.49736	0.841696	0.927885	0.960332	-0.0583955	-1.04131	3.79534	3.95211	-1.44112	1.32905
AC020916.1	19	13823880	13842929	-	169.353	22.9185	18.5551	18.817	0.842258	0.927885	0.971664	-0.0414704	-1.02916	20.0205	20.6044	-1.26758	1.19676
AC021074.1	3	142827096	142827729	-	19.8498	3.46107	2.11364	2.20553	0.907741	0.96181	1.06926	0.0966134	1.06926	2.38458	2.23012	-1.57753	1.80362
AC021078.1	5	149494314	149504671	-	90.0579	11.6761	9.90534	10.0064	0.946678	0.977151	0.986335	-0.0198499	-1.01385	10.025	10.1639	-1.31431	1.27863
AC021087.2	5	288833	290322	-	12.7765	2.66205	1.32501	1.41961	0.303509	0.557809	1.38186	0.466611	1.38186	1.75702	1.27149	-1.35303	2.58366
AC022007.1	3	10004048	10011210	-	31.8031	4.4284	3.48201	3.53368	0.955679	0.982066	1.00684	0.00983105	1.00684	3.87335	3.84705	-1.35292	1.37149
AC022107.1	5	69186359	69189453	-	38.6398	5.01483	4.26905	4.29332	0.94972	0.978251	0.999153	-0.00122314	-1.00085	4.14799	4.15151	-1.32418	1.32194
AC022149.1	19	14621634	14622243	-	1855.8	232.678	205.653	206.2	0.000119325	0.00352722	0.845718	-0.241751	-1.18243	191.38	226.293	-1.26693	-1.10356
AC022167.2	16	8848105	8860457	+	14.8578	2.54487	1.52931	1.65087	0.496997	0.729376	1.12732	0.172893	1.12732	1.8082	1.60399	-1.74883	2.22249
AC022182.3	8	60937705	60939872	-	22.2304	3.16178	2.40066	2.47004	0.0651066	0.237276	1.4462	0.532271	1.4462	2.85225	1.97223	-1.04553	2.18673
AC022210.1	2	84915868	84916661	+	15.3439	2.63543	1.63986	1.70488	0.711228	0.860566	1.13252	0.179539	1.13252	1.61412	1.42524	-1.45999	1.87259
AC022210.2	2	84926019	84966686	+	14.237	2.46927	1.54505	1.58189	0.400102	0.648304	1.24139	0.311962	1.24139	1.82382	1.46917	-1.29907	2.00195
AC022211.3	17	75271369	75273896	+	50.5351	6.83297	5.57367	5.61501	0.683325	0.846207	1.04685	0.0660582	1.04685	5.75688	5.49923	-1.25406	1.37433
AC022306.1	15	49365124	49366686	-	28.7698	4.09971	3.15412	3.19664	0.732908	0.873415	1.0435	0.0614318	1.0435	3.12622	2.99589	-1.36622	1.48767
AC022384.1	3	10249372	10285797	+	60.2244	9.67612	6.36888	6.6916	0.537579	0.757663	0.929399	-0.10563	-1.07596	6.76497	7.27887	-1.71717	1.48326
AC022400.7	10	73796514	73811652	-	18.8135	3.6159	1.54212	2.09038	0.248967	0.505249	1.27489	0.350369	1.27489	2.33508	1.8316	-2.84752	4.62817
AC022400.8	10	73742995	73744231	-	14.9206	2.96311	1.58158	1.65784	0.360322	0.615358	1.31645	0.396651	1.31645	2.01398	1.52986	-1.30344	2.25891
AC022400.9	10	73769264	73772863	-	43.3487	6.34775	4.7726	4.81652	0.410942	0.657855	0.894063	-0.161551	-1.11849	4.83097	5.40338	-1.45831	1.1657
AC022413.2	5	180810401	180811385	+	11.2389	2.46927	1.13392	1.24877	0.678352	0.843303	1.22408	0.291701	1.22408	1.60518	1.31133	-1.59857	2.39527
AC022613.1	15	29674990	29680958	+	580.012	78.6702	63.6426	64.4458	0.213592	0.465482	1.08379	0.116084	1.08379	73.282	67.6165	-1.04878	1.2319
AC022613.2	15	29822631	29824082	+	12.3036	2.45174	1.29268	1.36707	0.341979	0.597309	0.785401	-0.348499	-1.27324	1.39842	1.78052	-2.12882	1.31317
AC022968.1	18	68277802	68278244	-	46.6671	6.11941	5.16406	5.18523	0.853469	0.93484	1.02173	0.0310095	1.02173	5.24604	5.13449	-1.26695	1.3226
AC023024.1	15	101295419	101305738	+	24.6556	4.5918	2.48826	2.73951	0.0384137	0.175135	0.624947	-0.678194	-1.60014	1.66148	2.65859	-2.64345	1.03242
AC023024.2	15	101299656	101301649	-	28.4191	5.51939	2.90677	3.15768	0.0192204	0.115467	0.623103	-0.682457	-1.60487	1.84402	2.95942	-2.31449	-1.11282
AC023157.2	12	31729117	31731205	+	9.85772	1.58094	1.03733	1.0953	0.129959	0.35129	1.48972	0.575037	1.48972	1.43227	0.961436	-1.2257	2.72013
AC023509.1	12	53441741	53467529	+	150.564	20.9	16.3933	16.7293	0.0189335	0.1142	1.32899	0.410326	1.32899	18.6649	14.0445	1.0302	1.71443
AC023968.2	15	79559256	79560305	-	10.4905	1.83184	1.07906	1.16561	0.804345	0.909645	1.09158	0.126418	1.09158	1.31784	1.20728	-1.81786	2.16607
AC024075.2	19	16633797	16635270	-	13.009	2.55514	1.36923	1.44544	0.206003	0.456741	0.701835	-0.510796	-1.42484	1.24881	1.77935	-2.55086	1.25648
AC024293.1	11	46428653	46429151	-	1201.89	145.908	133.435	133.543	0.0966757	0.298135	0.936155	-0.0951802	-1.0682	128.124	136.861	-1.15509	1.0123
AC024587.1	5	107724961	107727118	+	11.262	1.85991	1.23133	1.25133	0.37079	0.624402	1.25932	0.332645	1.25932	1.44534	1.14772	-1.29508	2.05385
AC024619.4	17	29021325	29021641	-	13.5988	2.07714	1.47672	1.51098	0.783006	0.900382	0.954555	-0.0670991	-1.04761	1.45755	1.52694	-1.72654	1.57318
AC024940.3	12	31251992	31252598	-	151.935	18.9676	16.7714	16.8817	0.519871	0.744762	0.95546	-0.0657331	-1.04662	15.6385	16.3676	-1.25051	1.1416
AC025048.6	17	60101759	60102920	-	43.6368	7.18314	4.68481	4.84853	0.0153849	0.100922	0.697614	-0.519499	-1.43346	4.48543	6.42968	-1.89908	-1.082
AC025165.3	12	57772660	57797555	+	15.1245	3.48077	1.16561	1.6805	0.522301	0.746605	0.464998	-1.1047	-2.15055	0.90362	1.94328	-8.22234	1.77786
AC025171.1	5	43013060	43067453	-	60.7086	7.21092	6.73603	6.7454	0.635524	0.819314	1.0471	0.0663988	1.0471	6.88457	6.5749	-1.17957	1.2933
AC025171.2	5	43041575	43054604	+	42.7987	6.36759	4.68995	4.75541	0.369375	0.623554	0.891502	-0.16569	-1.1217	4.20679	4.71877	-1.51692	1.20561
AC025423.2	12	68841946	68842385	+	61.4093	8.79373	6.72796	6.82325	0.970376	0.987663	0.987953	-0.0174852	-1.01219	6.19937	6.27496	-1.31072	1.27933
AC025423.4	12	68841288	68843238	-	53.7085	7.73887	5.75849	5.96761	0.0104632	0.0799973	0.654581	-0.611356	-1.52769	4.45413	6.80455	-2.13566	-1.0928
AC025588.1	19	57175233	57177922	+	9.81976	1.73839	1.0131	1.09108	0.882332	0.948203	0.97958	-0.0297644	-1.02085	0.910361	0.929338	-1.99288	1.91232
AC026271.1	17	18650195	18651543	+	213.113	26.6908	23.6241	23.6793	0.354401	0.610188	1.06657	0.0929772	1.06657	24.258	22.744	-1.07981	1.22835
AC026273.1	2	94195806	94208380	-	19.7968	3.34325	2.15022	2.19965	0.345637	0.601286	0.815541	-0.29417	-1.22618	2.14942	2.63558	-1.82945	1.21678
AC026362.1	12	122975320	122982908	+	69.3507	10.4411	7.56634	7.70564	0.948152	0.977636	1.00283	0.00408423	1.00283	8.33756	8.31399	-1.32057	1.32807
AC026401.3	16	15701237	15702119	+	25.0187	4.8101	2.67559	2.77985	0.203244	0.453888	1.36174	0.445454	1.36174	3.41454	2.50748	-1.13847	2.11112
AC026403.1	5	166382305	166382600	+	998.529	121.041	110.788	110.948	0.26293	0.520928	0.953496	-0.0687007	-1.04877	105.807	110.968	-1.14496	1.04095
AC026410.3	5	80351021	80351957	-	38.7153	5.08307	4.26438	4.3017	0.176034	0.419446	1.18917	0.249953	1.18917	4.91561	4.13365	-1.10429	1.56159
AC026412.1	5	1598920	1634006	-	54.1109	6.855	5.99462	6.01232	0.904872	0.960593	1.01047	0.0150272	1.01047	6.13144	6.06791	-1.25063	1.27696
AC026412.2	5	1614836	1616335	+	21.8387	3.61814	2.385	2.42652	0.977179	0.990765	0.993753	-0.00904039	-1.00629	2.31805	2.33263	-1.50877	1.48997
AC026462.1	16	52655307	52656046	+	202.81	24.8369	22.4963	22.5345	0.33859	0.593797	0.940186	-0.0889813	-1.06362	21.3228	22.6794	-1.20886	1.06857
AC026471.1	16	31456711	31459737	-	109.732	15.6083	12.0407	12.1925	0.210552	0.462223	0.850249	-0.234043	-1.17613	11.0857	13.0382	-1.51044	1.09193
AC026748.3	5	1345197	1350787	+	111.711	14.5985	12.2805	12.4123	0.374618	0.626892	0.927215	-0.109025	-1.0785	12.9683	13.9863	-1.28804	1.10736
AC026877.1	3	76434018	76435429	+	34.8195	4.53584	3.82817	3.86884	0.135251	0.360687	0.798826	-0.324047	-1.25184	3.37109	4.22005	-1.69479	1.08148
AC026951.1	15	31765743	31768202	-	12.4797	2.13888	1.26522	1.38663	0.35911	0.614382	1.31588	0.396027	1.31588	1.84167	1.39957	-1.43019	2.47643
AC027031.2	8	106270144	106272903	+	13.4842	2.71033	1.43151	1.49824	0.0344823	0.164194	0.580432	-0.784802	-1.72286	1.19159	2.05294	-2.77093	-1.07121
AC027097.1	18	57630302	57669297	+	11.0625	2.14716	1.1643	1.22916	0.0706215	0.247451	1.70715	0.771593	1.70715	1.5494	0.907593	-1.03743	3.02345
AC027117.1	8	17808361	17822184	+	22.4808	3.14023	2.45533	2.49787	0.112133	0.323734	1.32981	0.411223	1.32981	2.64745	1.99085	-1.07077	1.89356
AC027117.2	8	17801345	17861070	+	12.0771	1.88861	1.29786	1.3419	0.865423	0.939935	0.883204	-0.179181	-1.13224	1.26095	1.4277	-1.99898	1.5593
AC027228.2	15	78589123	78591277	-	77.9663	10.6236	8.58225	8.66293	0.254746	0.511628	0.880937	-0.182889	-1.13515	7.70801	8.74979	-1.43085	1.11041
AC027237.5	15	69396904	69415030	-	35.9498	5.50503	3.90058	3.99442	0.0595511	0.225431	1.3766	0.461115	1.3766	4.89994	3.55944	-1.01524	1.92393
AC027307.2	19	1457670	1458581	-	43.3456	6.65975	4.65143	4.81618	0.430106	0.674258	0.812416	-0.29971	-1.2309	4.23704	5.21535	-1.88342	1.24309
AC027309.2	5	172656522	172656714	-	14.4948	2.19226	1.52588	1.61053	0.634837	0.81904	1.19539	0.25748	1.19539	1.66723	1.39472	-1.52732	2.18247
AC027601.2	17	81228707	81233984	+	13.2744	1.94803	1.44282	1.47493	0.418249	0.664144	0.841232	-0.249424	-1.18873	1.3317	1.58304	-1.95248	1.38172
AC027601.6	17	81339183	81345967	-	27.6639	4.48214	2.99672	3.07377	0.633369	0.817886	1.13316	0.180352	1.13316	3.45828	3.05189	-1.32563	1.70218
AC027612.1	2	91736726	91767440	+	45.6547	6.79668	4.90182	5.07275	0.390787	0.639632	0.872818	-0.196247	-1.14571	5.2349	5.9977	-1.64969	1.25675
AC027612.3	2	91747940	91748987	-	25.5887	4.11862	2.78445	2.84319	0.331839	0.587845	0.828297	-0.27178	-1.2073	2.60368	3.14342	-1.7938	1.23068
AC027644.3	7	66739829	66740386	-	13.367	2.42862	1.40529	1.48522	0.811384	0.912816	1.06376	0.0891679	1.06376	1.55887	1.46544	-1.74225	1.97149
AC027801.3	17	49939122	49939820	+	24.1401	4.12332	2.62268	2.68223	0.607463	0.803122	0.877215	-0.188998	-1.13997	2.50973	2.86102	-1.72928	1.33069
AC034102.1	12	55980432	55981036	-	160.102	21.4308	17.6699	17.7891	0.00494536	0.0496385	0.788317	-0.343151	-1.26852	15.5741	19.7561	-1.47993	-1.08732
AC034236.1	5	116051917	116052290	-	233.608	27.4777	25.9049	25.9564	0.584878	0.78851	0.967302	-0.0479623	-1.0338	24.9004	25.7421	-1.17664	1.10095
AC036176.1	18	63367328	63381630	+	10.3665	1.55541	1.12899	1.15183	0.530726	0.752954	1.19188	0.253241	1.19188	1.18237	0.992016	-1.4128	2.007
AC037459.2	8	22613908	22616658	-	93.9341	13.7551	10.3288	10.4371	0.561825	0.774798	0.91731	-0.124519	-1.09014	9.75918	10.6389	-1.39452	1.17343
AC040160.1	16	67261108	67263785	+	21.8074	3.67757	2.34918	2.42305	0.264241	0.522548	0.778768	-0.360735	-1.28408	2.22232	2.85364	-1.99538	1.21016
AC040162.3	16	67882461	67886368	+	23.0386	3.07555	2.5272	2.55984	0.280377	0.538921	0.835013	-0.26013	-1.19759	2.21101	2.64787	-1.71662	1.19691
AC040169.1	16	84117051	84117572	+	11.0378	2.11078	1.16846	1.22643	0.157148	0.39201	0.669764	-0.578276	-1.49306	1.04749	1.56397	-2.64267	1.18546
AC040970.1	8	141124717	141130065	-	16.2456	2.51442	1.74891	1.80507	0.0587191	0.223459	1.45714	0.543138	1.45714	2.40134	1.64798	-1.01937	2.16437
AC041005.1	8	25179113	25184235	-	10.6987	1.58094	1.13519	1.18875	0.522502	0.746669	1.16958	0.225985	1.16958	1.49108	1.27489	-1.4344	1.96213
AC044787.1	15	47730144	47730936	-	287.576	35.7147	31.8951	31.9529	0.0364021	0.16957	0.886638	-0.173583	-1.12786	29.9739	33.8062	-1.26006	-1.00952
AC044860.1	15	85180200	85234796	-	28.5352	4.56432	2.90836	3.17058	0.568703	0.779728	0.882677	-0.180042	-1.13292	3.0658	3.4733	-2.2029	1.71633
AC046134.2	3	139389761	139782700	+	14.7876	2.37881	1.60454	1.64307	0.835127	0.924515	0.986517	-0.0195843	-1.01367	1.52947	1.55038	-1.63646	1.59262
AC046176.1	8	56050038	56051208	-	229.214	28.2458	25.3908	25.4683	0.430033	0.674258	1.05499	0.0772273	1.05499	25.7329	24.3917	-1.0973	1.22129
AC048338.1	12	122207779	122266424	-	30.3716	4.82077	3.02605	3.37463	0.00642143	0.0582592	2.07823	1.05536	2.07823	4.66863	2.24644	1.12304	3.84586
AC048341.1	12	62602752	62622214	+	23.2701	2.98135	2.57006	2.58556	0.597851	0.797218	0.914868	-0.128364	-1.09305	2.47037	2.70024	-1.54596	1.29394
AC055811.4	17	17181504	17183258	+	24.452	3.62673	2.67071	2.71689	0.697684	0.85326	0.948408	-0.0764203	-1.0544	2.81133	2.96426	-1.54137	1.38643
AC060780.1	17	43148368	43171038	-	34.1986	5.57711	3.72921	3.79985	0.423368	0.667703	1.14256	0.192265	1.14256	4.37811	3.83186	-1.21714	1.5889
AC063947.2	12	101066734	101069233	+	18.2937	2.34031	2.01495	2.03264	0.558315	0.772415	1.10635	0.14581	1.10635	2.07735	1.87766	-1.33452	1.63347
AC064807.1	8	51899268	51949875	+	32.4995	4.1171	3.59166	3.61105	0.440642	0.683466	0.895192	-0.159731	-1.11708	3.46884	3.87497	-1.50242	1.20399
AC067750.1	10	86749754	86756299	-	12.8655	2.62373	1.33726	1.4295	0.171227	0.413141	1.46129	0.547247	1.46129	1.96127	1.34215	-1.17167	2.50196
AC067852.2	17	42552436	42554749	-	278.142	34.6842	30.824	30.9046	0.144196	0.374392	1.09891	0.136074	1.09891	32.0791	29.1917	-1.0366	1.2518
AC067930.1	8	143579636	143580671	+	45.1297	6.14799	4.97505	5.01441	0.615015	0.808516	0.942516	-0.0854112	-1.06099	5.03554	5.34265	-1.39903	1.2428
AC067930.5	8	143578358	143583305	+	145.883	19.7596	16.081	16.2092	0.676547	0.842517	1.05279	0.0742186	1.05279	16.4787	15.6524	-1.17874	1.30648
AC067930.8	8	143541648	143545129	+	14.0264	2.7118	1.38206	1.55849	0.923006	0.967707	0.996107	-0.00562769	-1.00391	1.22887	1.23367	-2.05925	2.04325
AC067942.2	4	82580117	82581385	-	15.667	2.18075	1.70968	1.74078	0.959694	0.983799	1.00817	0.0117346	1.00817	1.7449	1.73077	-1.57799	1.60387
AC068134.3	2	232343116	232343904	+	9.46599	1.37019	1.02165	1.05178	0.389653	0.638794	0.818019	-0.289793	-1.22246	0.994144	1.21531	-2.16258	1.4471
AC068338.2	15	75368155	75369585	+	18.2306	2.93218	1.91954	2.02562	0.176067	0.419446	0.771732	-0.373828	-1.29579	2.02821	2.62813	-2.05782	1.22558
AC068446.1	15	21293653	21295202	-	26.0738	3.79442	2.85546	2.89709	0.511371	0.738623	0.886913	-0.173135	-1.12751	2.84302	3.20552	-1.62135	1.27538
AC068473.5	18	79677287	79679359	-	14.1359	2.37051	1.51151	1.57066	0.882201	0.948187	1.02355	0.0335815	1.02355	1.6158	1.57862	-1.71257	1.79419
AC068491.1	2	111383752	111384993	+	10.4061	1.76692	1.10676	1.15623	0.880665	0.947248	1.02661	0.0378918	1.02661	1.27562	1.24256	-1.77269	1.8683
AC068547.1	2	151802651	151973950	-	39.9867	5.9053	4.28038	4.44296	0.544809	0.762888	0.900465	-0.151258	-1.11054	4.1093	4.56353	-1.73974	1.41064
AC068580.4	11	1734821	1763955	-	169.032	25.3797	18.332	18.7813	0.00250349	0.0316354	0.670359	-0.576993	-1.49174	14.6598	21.8685	-1.8851	-1.18046
AC068631.4	3	186596976	186597201	+	44.4118	6.13748	4.88843	4.93464	0.133142	0.356982	1.1962	0.258464	1.1962	5.77736	4.82974	-1.06204	1.51968
AC068831.8	15	90966190	91022567	-	165.826	23.4387	18.2215	18.4251	0.00488693	0.0492326	1.24188	0.312526	1.24188	21.9804	17.6993	1.07989	1.42817
AC068888.1	12	53012884	53054451	-	44.6344	6.524	4.90961	4.95938	0.255583	0.512522	1.16379	0.218836	1.16379	5.56463	4.78145	-1.13521	1.53755
AC068946.2	2	219209772	219222739	-	52.3236	7.97001	5.1379	5.81374	0.255054	0.511948	1.5105	0.595024	1.5105	7.39731	4.89727	-1.41388	3.22593
AC069281.2	7	100572232	100578701	-	20.2344	3.70704	2.05015	2.24826	0.198347	0.448592	0.679233	-0.558021	-1.47225	1.78388	2.62631	-2.82804	1.30474
AC069288.1	7	1815804	2242216	-	36.5293	8.18722	2.70389	4.05881	0.0911201	0.287788	1.48766	0.57304	1.48766	4.4659	3.00197	-3.34104	7.39412
AC072028.1	3	142687982	142723882	-	12.5859	1.99763	1.32861	1.39843	0.097559	0.299473	1.56149	0.642924	1.56149	1.77349	1.13577	-1.12669	2.74717
AC073073.1	7	105530209	105530672	+	48.0284	6.41046	5.25817	5.33648	0.35245	0.607912	0.870255	-0.200489	-1.14909	4.54179	5.21892	-1.50969	1.14336
AC073073.2	7	105571083	105573661	+	10.292	1.85991	1.05888	1.14355	0.18224	0.428628	1.42072	0.506624	1.42072	1.35009	0.950287	-1.40927	2.84453
AC073111.4	7	150400702	150412471	+	71.0042	11.872	7.47459	7.88936	0.000688122	0.0131108	1.57917	0.659169	1.57917	7.83991	4.96457	1.25827	1.98191
AC073130.3	7	116209234	116211512	-	12.2617	2.75066	1.27346	1.36241	0.0165394	0.104681	0.515067	-0.957169	-1.9415	1.04206	2.02316	-3.18949	-1.18182
AC073136.1	7	56288230	56291426	+	52.1202	7.56003	5.68353	5.79113	0.232672	0.488252	1.18207	0.241313	1.18207	5.99807	5.07421	-1.16418	1.62669
AC073508.3	17	40648300	40649719	+	30.1779	4.29268	3.30056	3.3531	0.570258	0.780519	0.910285	-0.13561	-1.09856	3.33858	3.66762	-1.56965	1.30064
AC073548.1	19	47487638	47489520	-	29.4297	4.2335	3.20655	3.26997	0.48593	0.719603	0.867904	-0.204393	-1.1522	2.82782	3.25822	-1.65335	1.2454
AC073569.2	12	79690144	79778452	+	13.4357	2.82685	1.33957	1.49286	0.185456	0.433213	1.4064	0.492003	1.4064	1.58494	1.12695	-1.50202	2.97093
AC073593.2	12	124786783	124808791	+	27.3716	3.8304	2.92491	3.04129	0.606784	0.802971	0.958601	-0.0609981	-1.04319	3.01733	3.14764	-1.71783	1.57854
AC073857.1	12	123152324	123153378	-	18.8228	3.38233	1.9823	2.09142	0.476898	0.712122	0.825623	-0.276445	-1.21121	1.97671	2.3942	-2.08957	1.42436
AC073861.1	3	101576489	101576948	-	474.369	57.3387	52.6612	52.7077	0.811406	0.912816	0.987633	-0.0179525	-1.01252	52.2561	52.9104	-1.12083	1.09328
AC073896.1	12	56285916	56316060	-	163.178	21.9765	17.9698	18.1309	0.172447	0.414416	0.86572	-0.208027	-1.15511	17.0115	19.6501	-1.42223	1.06592
AC073896.2	12	56300076	56317993	+	35.1018	5.9953	3.81037	3.9002	0.0205858	0.120471	1.50233	0.587205	1.50233	4.5423	3.0235	1.09527	2.06068
AC073957.3	7	879790	886548	-	18.6955	3.69524	2.00249	2.07728	0.655669	0.830191	0.846749	-0.239993	-1.18099	1.9948	2.35583	-1.93077	1.38433
AC074043.1	3	107104911	107107001	-	21.723	3.16178	2.34292	2.41367	0.91769	0.96618	0.998043	-0.00282684	-1.00196	2.57995	2.58501	-1.57248	1.56633
AC074117.1	2	27356246	27367623	+	124.148	15.7743	13.725	13.7942	0.112904	0.325176	1.15145	0.203456	1.15145	14.8886	12.9302	-1.04131	1.38062
AC074134.1	5	32522758	32523866	+	18.0629	2.45174	1.9943	2.00699	0.517453	0.743001	0.888784	-0.170095	-1.12513	1.96732	2.21349	-1.63492	1.29148
AC074143.1	16	67163385	67165816	+	35.3969	5.37395	3.85707	3.93299	0.901583	0.958353	1.01724	0.0246663	1.01724	3.66558	3.60344	-1.39333	1.4418
AC074183.2	7	84939335	84940257	-	13.8868	2.26797	1.4767	1.54298	0.424213	0.668411	1.26132	0.334937	1.26132	1.75948	1.39495	-1.38851	2.20902
AC074212.1	19	45764785	45769807	+	10.8471	1.54154	1.17834	1.20523	0.656882	0.830774	1.10812	0.148118	1.10812	1.33576	1.20542	-1.53206	1.88127
AC078819.1	12	104030779	104031544	+	823.809	100.491	91.3382	91.5343	0.0449082	0.191383	1.09411	0.129757	1.09411	92.7733	84.7934	1.00306	1.19343
AC078846.1	7	129604548	129611631	-	24.3249	4.59146	2.60543	2.70276	0.0444773	0.190337	1.57201	0.652607	1.57201	3.38806	2.15525	1.04293	2.36949
AC078899.1	19	20257720	20259419	+	27.2462	3.7206	2.98692	3.02736	0.238421	0.494536	1.21082	0.275982	1.21082	3.32625	2.74711	-1.17675	1.72521
AC078925.4	12	130988312	130990029	-	12.0232	2.04589	1.23489	1.33591	0.631964	0.817175	1.19628	0.258557	1.19628	1.5003	1.25414	-1.70816	2.44453
AC079305.2	2	177264359	177265516	+	24.77	3.52194	2.69026	2.75222	0.539244	0.758589	0.906508	-0.141608	-1.10313	2.71469	2.99466	-1.67765	1.37862
AC079328.1	15	62953173	62954125	+	13.7377	1.85851	1.47935	1.52641	0.780945	0.899035	0.97513	-0.0363331	-1.0255	1.40989	1.44585	-1.73716	1.65183
AC079781.5	7	97851688	97972986	-	100.227	18.2834	10.4944	11.1363	0.00999982	0.078018	0.580842	-0.783783	-1.72164	7.97174	13.7245	-2.5481	-1.16324
AC079944.2	3	113885298	113886032	+	38.6947	5.08604	4.24323	4.29942	0.835893	0.924742	1.0406	0.0574177	1.0406	4.05308	3.89494	-1.29645	1.40387
AC080023.2	11	10272052	10272260	-	12.5709	2.17183	1.34575	1.39676	0.430655	0.674917	1.2699	0.344712	1.2699	1.49799	1.17961	-1.35709	2.1885
AC080112.2	17	40360655	40364694	+	158.747	21.7367	17.4515	17.6386	0.2018	0.452788	0.876456	-0.190247	-1.14096	16.8994	19.2815	-1.42229	1.09257
AC083798.2	3	122416207	122443181	+	62.1415	9.31983	6.69258	6.90461	0.209412	0.460651	0.825796	-0.276143	-1.21095	6.02858	7.30032	-1.75438	1.19638
AC083799.1	3	129847048	129847958	-	13.5387	2.07794	1.44855	1.5043	0.969854	0.98738	1.01169	0.0167673	1.01169	1.71383	1.69403	-1.61453	1.6525
AC083843.3	8	134792020	134798273	-	13.9139	2.22887	1.4827	1.54598	0.558478	0.772521	0.879007	-0.186053	-1.13765	1.48763	1.69239	-2.00717	1.55085
AC083873.1	7	133169416	133170515	-	45.8808	6.34256	5.01214	5.09786	0.950425	0.978697	0.987568	-0.0180479	-1.01259	5.30121	5.36794	-1.41088	1.37602
AC083899.1	2	87125198	87196630	+	43.7163	5.60945	4.82606	4.85737	0.342493	0.597837	1.1305	0.176961	1.1305	5.30536	4.69293	-1.15422	1.47513
AC084018.2	12	121800797	121803404	+	11.9448	1.91907	1.28189	1.3272	0.274779	0.531977	1.28498	0.361744	1.28498	1.35821	1.05699	-1.31774	2.17581
AC084125.2	8	144495458	144505445	-	45.579	6.4473	4.98785	5.06434	0.0540067	0.213031	1.315	0.395059	1.315	5.98907	4.55444	-1.00976	1.7461
AC084824.2	12	32726383	32727388	-	333.895	40.2566	37.051	37.0994	0.0694283	0.245244	0.908826	-0.137924	-1.10032	35.269	38.8072	-1.222	1.00933
AC084880.1	12	119194850	119195395	+	115.927	14.6176	12.8465	12.8807	0.231263	0.486432	1.10279	0.141152	1.10279	13.6487	12.3765	-1.0738	1.30588
AC087289.5	17	75876372	75879547	+	30.868	4.45292	3.37953	3.42977	0.671619	0.839454	0.956863	-0.0636155	-1.04508	3.28096	3.42887	-1.49474	1.36857
AC087482.1	15	66984103	67065269	-	12.4248	3.16178	1.22914	1.38054	0.485339	0.719469	1.34885	0.431725	1.34885	1.91926	1.42289	-1.39584	2.53957
AC087623.2	8	38382364	38383462	+	11.3775	2.34031	1.19615	1.26417	0.519243	0.744266	0.772023	-0.373285	-1.2953	1.21177	1.56961	-2.35896	1.40598
AC087632.2	15	64181180	64381441	-	131.337	21.9719	13.747	14.593	0.00642773	0.0582592	1.57999	0.659913	1.57999	20.3864	12.9029	1.15811	2.15555
AC087633.2	15	94841059	95169865	+	49.6798	7.13464	5.41434	5.51998	0.030439	0.152471	0.732684	-0.448736	-1.36484	4.40121	6.00697	-1.80946	-1.02948
AC087721.2	15	41284007	41380997	+	49.5755	10.7303	4.78562	5.50839	0.00702124	0.0619958	1.986	0.989862	1.986	8.73379	4.39769	1.17601	3.35386
AC087741.1	17	80200673	80205950	-	23.7214	3.71692	2.56164	2.63571	0.0874623	0.281746	1.38882	0.473855	1.38882	3.25346	2.34261	-1.07068	2.06513
AC090114.1	7	128570241	128570689	-	14.1249	2.25079	1.54918	1.56943	0.706438	0.857533	0.905686	-0.142917	-1.10414	1.57125	1.73487	-1.71701	1.4084
AC090114.2	7	128524016	128531070	-	47.9146	6.77651	5.15415	5.32385	0.627127	0.814545	0.942302	-0.0857387	-1.06123	5.98517	6.35165	-1.36369	1.21087
AC090192.2	8	124271667	124279581	+	23.2608	3.53374	2.51781	2.58453	0.215624	0.467923	1.3464	0.429105	1.3464	2.88037	2.13932	-1.1271	2.04319
AC090198.1	8	124488510	124491644	+	11.5185	1.79386	1.22501	1.27984	0.973781	0.989618	0.954501	-0.0671807	-1.04767	1.28054	1.34158	-1.92117	1.75033
AC090204.1	8	32927913	33045446	+	68.4581	9.61564	7.44926	7.60646	0.402144	0.650651	0.867423	-0.205193	-1.15284	6.76301	7.79667	-1.59204	1.19788
AC090517.5	15	56795460	56918500	-	97.3957	12.0167	10.7585	10.8217	0.357119	0.612654	1.08719	0.12061	1.08719	11.8467	10.8965	-1.11063	1.31275
AC091057.1	15	30658717	30772994	+	85.2917	13.0043	9.30534	9.47685	0.00640859	0.0582592	1.38227	0.46704	1.38227	11.6655	8.43939	1.10444	1.72999
AC091153.1	17	4704816	4705218	-	38.5367	5.53105	4.21605	4.28185	0.63485	0.81904	1.08879	0.122728	1.08879	4.49932	4.1324	-1.29385	1.53382
AC091167.1	15	90275129	90275717	+	114.655	16.3783	12.633	12.7395	0.0451938	0.19203	0.822586	-0.281762	-1.21568	11.9548	14.5332	-1.46917	-1.00593
AC091564.2	11	6603642	6604421	-	10.331	1.67051	1.10641	1.14789	0.975997	0.990188	1.02144	0.0306038	1.02144	1.15972	1.13538	-1.78407	1.86139
AC091729.3	7	1160374	1165608	+	56.1201	7.65237	6.20477	6.23557	0.438334	0.681837	1.09931	0.136604	1.09931	6.68038	6.07686	-1.15518	1.39603
AC091959.3	5	146203550	146339252	+	185.802	25.5367	20.4468	20.6447	0.0319378	0.157408	1.24414	0.315145	1.24414	23.0032	18.4893	1.02938	1.50369
AC091982.3	5	151770242	151771509	-	17.3901	2.8884	1.85471	1.93223	0.257317	0.514594	0.762734	-0.390747	-1.31107	1.81711	2.38236	-2.13807	1.24385
AC092017.1	1	211207239	211207898	+	241.271	30.9312	26.6559	26.8079	0.0163974	0.104232	1.20567	0.26984	1.20567	29.0724	24.113	1.04032	1.39731
AC092045.1	3	52373652	52374883	+	19.3055	3.26275	1.95305	2.14505	0.548442	0.765463	1.18572	0.245762	1.18572	2.68297	2.26273	-1.59823	2.247
AC092053.4	3	39148281	39172953	+	13.0583	2.07794	1.3776	1.45092	0.0994203	0.302664	0.663049	-0.592812	-1.50818	1.24622	1.87953	-2.59844	1.14236
AC092115.2	16	69756536	69757938	-	166.254	21.1591	18.4379	18.4726	0.624298	0.813575	0.962578	-0.0550246	-1.03888	18.3225	19.0348	-1.20447	1.11601
AC092118.1	16	57798186	57816947	+	104.631	15.8244	11.4124	11.6257	0.0128565	0.0907598	0.724146	-0.465647	-1.38094	9.84382	13.5937	-1.76727	-1.07906
AC092143.1	16	89919165	89936093	+	36.7232	6.35206	3.04179	4.08036	0.322022	0.578487	0.848805	-0.236496	-1.17813	3.19482	3.76391	-4.0288	2.90263
AC092279.1	19	24033401	24077378	+	76.8493	10.6426	8.32785	8.53881	0.177231	0.420913	0.874338	-0.193737	-1.14372	9.03024	10.3281	-1.41701	1.08326
AC092336.1	5	10493291	10494095	-	24.2096	3.2829	2.60949	2.68996	0.289606	0.546267	0.812143	-0.300194	-1.23131	2.49012	3.06612	-1.92212	1.26779
AC092368.3	16	46622861	46624452	-	35.1677	7.07048	3.468	3.90753	0.918967	0.966765	0.929047	-0.106176	-1.07637	2.76008	2.97087	-1.81836	1.56948
AC092447.2	7	56567906	56568859	-	92.0482	12.1681	10.1704	10.2276	0.368847	0.623101	0.914702	-0.128626	-1.09325	9.78499	10.6975	-1.35383	1.13272
AC092683.1	2	97416165	97433528	-	30.2319	5.13	3.25911	3.3591	0.125505	0.344215	0.735589	-0.443028	-1.35946	2.81754	3.83032	-2.03574	1.10152
AC092718.3	16	81053587	81096297	-	30.1909	4.29047	3.2633	3.35455	0.172557	0.414448	0.763498	-0.389304	-1.30976	2.79758	3.66416	-1.94419	1.13333
AC092718.4	16	81030770	81031486	+	77.0494	11.4785	8.48742	8.56105	0.0602466	0.227004	1.24667	0.31808	1.24667	9.45112	7.58109	-1.00072	1.55531
AC092747.4	12	27037100	27038961	+	16.2774	2.17297	1.78247	1.8086	0.823892	0.918342	1.04477	0.0631887	1.04477	1.9638	1.87964	-1.46442	1.59849
AC092868.2	15	59406963	59408155	-	15.7856	2.56318	1.69029	1.75395	0.263455	0.521608	0.766644	-0.383371	-1.30439	1.68987	2.20424	-2.08252	1.22399
AC092944.1	3	157174201	157381266	+	14.4375	1.78076	1.59966	1.60416	0.88657	0.949986	0.97337	-0.0389395	-1.02736	1.5384	1.58049	-1.54001	1.45909
AC093010.2	3	114314501	114329715	-	62.0247	10.9136	6.30487	6.89164	0.00124954	0.0194064	0.467981	-1.09548	-2.13684	4.20923	8.99445	-3.29942	-1.38391
AC093157.1	1	101025844	101090514	+	20.9148	2.88281	2.26911	2.32387	0.79101	0.902952	0.984695	-0.0222516	-1.01554	2.38093	2.41794	-1.59367	1.54526
AC093249.6	16	30697707	30699059	-	15.1823	2.61965	1.59086	1.68693	0.386667	0.636084	0.823537	-0.280095	-1.21427	1.54253	1.87305	-2.24941	1.52558
AC093297.2	5	44826076	44828593	+	21.099	3.49828	2.09569	2.34433	0.740166	0.876027	0.931178	-0.10287	-1.07391	2.76221	2.96636	-1.86472	1.61689
AC093323.1	4	6663396	6676756	+	128.083	19.896	13.9357	14.2315	0.329572	0.585825	1.10684	0.146441	1.10684	16.6423	15.0359	-1.11161	1.36181
AC093433.1	1	77194825	77195396	+	22.0374	3.65448	2.37682	2.4486	0.23976	0.49594	1.30749	0.386797	1.30749	2.8296	2.16415	-1.19348	2.04029
AC093512.2	16	30053090	30070421	+	319.747	42.9943	35.2887	35.5274	0.928209	0.968894	1.00045	0.000644288	1.00045	35.1137	35.098	-1.20122	1.2023
AC093525.2	16	2496032	2520219	+	14.6142	3.21818	1.22881	1.6238	0.423814	0.668255	1.04816	0.0678654	1.04816	1.73754	1.6577	-3.54497	3.89468
AC093525.6	16	2554060	2556061	-	37.2586	5.44344	3.99641	4.13985	0.124382	0.342642	0.74894	-0.417079	-1.33522	3.7942	5.0661	-1.98342	1.11252
AC093525.7	16	2561471	2565097	-	104.438	14.8329	11.4392	11.6042	0.00854595	0.0706835	0.754466	-0.406473	-1.32544	10.5326	13.9603	-1.6239	-1.08183
AC093627.5	7	135853	149528	-	18.6438	2.51085	2.03743	2.07153	0.615138	0.808516	1.10512	0.144201	1.10512	2.32302	2.10205	-1.3615	1.66278
AC093673.1	7	143379692	143380496	-	21.4382	3.25238	2.3294	2.38202	0.0567334	0.219036	0.692514	-0.530085	-1.44401	1.98364	2.86441	-2.12703	1.02007
AC093752.1	4	119454791	119552026	+	15.2758	2.25863	1.65972	1.69731	0.995535	0.998303	0.991699	-0.0120256	-1.00837	1.80848	1.82362	-1.60703	1.58047
AC093827.4	4	86924630	86936203	-	11.6857	1.78311	1.25383	1.29841	0.818713	0.915927	0.937182	-0.093599	-1.06703	1.38127	1.47385	-1.82047	1.59893
AC093909.1	4	188738373	188739495	+	24.1294	3.54316	2.62763	2.68104	0.0758689	0.258584	1.38049	0.465182	1.38049	3.13143	2.26835	-1.05472	2.01004
AC093909.6	4	188740507	188741282	-	10.0848	1.8607	1.04178	1.12053	0.569129	0.780002	1.22912	0.297623	1.22912	1.2601	1.02521	-1.63862	2.47552
AC096887.2	3	53046166	53048123	+	18.7395	2.78365	1.89612	2.08217	0.0911283	0.287788	1.49113	0.576406	1.49113	2.44214	1.63778	-1.35734	3.018
AC097263.1	X	25645722	25646328	-	388.505	49.6822	42.9886	43.1673	0.0843607	0.275375	1.12417	0.168856	1.12417	46.1107	41.0177	-1.02053	1.2897
AC097359.2	3	37241789	37244178	-	26.1289	3.99874	2.73816	2.90321	0.981242	0.992321	0.985153	-0.0215807	-1.01507	3.44902	3.501	-1.47198	1.4286
AC097376.3	4	139411927	139454035	-	16.2391	2.7759	1.74141	1.80435	0.576594	0.783486	0.844854	-0.243225	-1.18364	1.70008	2.01228	-1.97548	1.41005
AC097448.1	2	151796688	151798689	+	47.2277	7.10977	5.17455	5.24752	0.152203	0.385161	0.809545	-0.304816	-1.23526	4.83205	5.96884	-1.65767	1.08638
AC097658.2	4	143349275	143350118	-	23.2991	3.40861	2.42963	2.58879	0.189691	0.439071	1.40839	0.494049	1.40839	3.25071	2.3081	-1.23889	2.45742
AC097709.1	4	73997933	74007683	+	27.3835	5.81856	2.84013	3.04261	0.196115	0.446518	1.24988	0.321786	1.24988	2.55822	2.04678	-1.14855	1.79425
AC098591.3	4	39973128	39973443	-	33.5974	4.6298	3.67889	3.73305	0.188524	0.437887	0.820832	-0.284841	-1.21828	3.26362	3.97599	-1.70029	1.1456
AC098614.2	3	27632976	27639112	+	132.437	16.7784	14.5486	14.7153	0.953305	0.980328	0.994734	-0.00761756	-1.00529	16.0306	16.1155	-1.18772	1.17524
AC098935.1	1	206907619	206908230	+	17.9851	2.78606	1.96017	1.99835	0.361295	0.616387	0.825055	-0.277438	-1.21204	1.76709	2.14179	-1.86768	1.27136
AC099336.2	1	202471864	202472118	-	528.396	65.7278	58.596	58.7107	0.171779	0.41364	1.07713	0.107186	1.07713	60.8512	56.4941	-1.03678	1.20288
AC099560.2	3	40761545	40761800	+	736.861	84.7144	81.8428	81.8734	0.601853	0.799836	1.02001	0.0285786	1.02001	81.5004	79.9018	-1.06046	1.10331
AC099786.1	1	75127830	75133059	-	11.1699	2.34031	1.03274	1.2411	0.164016	0.402544	0.686017	-0.543684	-1.45769	1.33417	1.9448	-2.50151	1.17726
AC099786.2	1	75129974	75132577	-	83.3997	14.3126	8.07826	9.26663	0.235074	0.490568	0.856891	-0.222817	-1.16701	11.0688	12.9174	-1.53502	1.12711
AC100757.1	15	22371736	22373571	+	13.602	2.01285	1.46864	1.51133	0.71372	0.862201	0.909291	-0.137185	-1.09976	1.35049	1.48522	-1.83829	1.51992
AC100810.1	8	1761054	1764509	-	89.8729	11.7534	9.88106	9.98587	0.286583	0.543906	0.902981	-0.147233	-1.10744	10.166	11.2583	-1.36362	1.11186
AC100861.1	8	23224471	23230927	+	51.8481	6.91379	5.69516	5.7609	0.137729	0.364117	1.22155	0.288717	1.22155	6.38018	5.223	-1.08196	1.6145
AC102945.2	8	30552345	30553767	+	11.2433	1.71658	1.22023	1.24926	0.101361	0.306237	0.665711	-0.587032	-1.50215	0.998243	1.49951	-2.45316	1.08717
AC102953.2	7	1464497	1467523	-	41.7226	5.90328	4.59852	4.63584	0.652645	0.828699	1.06692	0.093456	1.06692	4.93718	4.62749	-1.24844	1.42113
AC103702.2	17	48635923	48647024	-	56.338	7.67597	6.21202	6.25977	0.340592	0.595901	0.902196	-0.148487	-1.10841	5.5262	6.12527	-1.39016	1.13153
AC104109.4	5	134205614	134371045	-	10.318	1.35447	1.13229	1.14645	0.97405	0.989618	1.00972	0.0139567	1.00972	1.18591	1.17449	-1.65036	1.68261
AC104212.3	8	80265528	80266156	-	9.293	1.56024	1.00562	1.03256	0.483248	0.71736	0.814926	-0.295259	-1.22711	0.910695	1.11752	-2.17373	1.44359
AC104297.1	3	17871729	17872599	-	78.5858	12.6854	8.45439	8.73176	0.703323	0.855686	1.03442	0.0488167	1.03442	7.24606	7.00497	-1.17033	1.25227
AC104447.1	3	47346950	47349074	+	19.3369	2.84915	2.13092	2.14854	0.818718	0.915927	1.04191	0.0592308	1.04191	2.13704	2.05107	-1.40708	1.52749
AC104581.4	17	7858943	7866084	+	12.4567	2.10036	1.2465	1.38407	0.67627	0.842318	0.842983	-0.246425	-1.18626	1.39793	1.65832	-2.56624	1.82362
AC104971.1	18	58670009	58671878	-	11.353	1.77558	1.1883	1.26145	0.962401	0.984954	1.07574	0.105328	1.07574	1.34928	1.25428	-1.81831	2.10418
AC104996.2	17	30068632	30069632	+	11.8232	2.01285	1.24382	1.31369	0.664911	0.83542	1.15539	0.208384	1.15539	1.21589	1.05236	-1.55064	2.07
AC105052.3	7	102637049	102671642	-	193.041	28.4094	20.965	21.449	0.436025	0.679426	1.09184	0.126757	1.09184	24.0983	22.0713	-1.20141	1.43221
AC105105.1	18	58535415	58538553	+	48.3113	7.83013	4.83611	5.36793	0.284893	0.542162	0.879044	-0.185993	-1.1376	4.53793	5.16235	-2.2826	1.76381
AC105285.1	4	173094868	173169653	-	16.5957	3.22167	1.76764	1.84396	0.191795	0.441205	0.730117	-0.4538	-1.36964	1.71861	2.35388	-2.19907	1.17226
AC105942.1	1	94927361	94963617	+	15.1012	2.84237	1.55444	1.67791	0.108493	0.318704	1.52365	0.607532	1.52365	2.34027	1.53596	-1.13318	2.6307
AC106017.2	17	19219143	19222528	+	14.4164	2.76106	1.52062	1.60182	0.891812	0.953008	1.0269	0.0382978	1.0269	1.70863	1.66387	-1.75486	1.85055
AC106782.1	16	30204316	30209072	-	25.9194	5.33004	2.5057	2.87993	0.000754895	0.0138683	0.412114	-1.27888	-2.42651	2.0203	4.90229	-3.82069	-1.54107
AC106795.1	5	177809407	177950733	+	265.53	33.8161	29.3383	29.5033	0.0562371	0.217821	1.15366	0.206216	1.15366	32.4323	28.1126	-1.00809	1.3417
AC106820.1	16	2332313	2332733	-	11.2791	1.89455	1.1026	1.25323	0.143399	0.372903	1.37568	0.460146	1.37568	1.38501	1.00678	-1.72143	3.2578
AC106886.5	16	30773532	30776034	-	27.4292	4.58791	2.87649	3.04769	0.707138	0.85774	1.03303	0.0468829	1.03303	3.30308	3.19746	-1.68176	1.7947
AC106886.6	16	30704067	30745170	+	589.168	77.6449	65.1022	65.4631	0.670566	0.838741	0.961566	-0.0565419	-1.03997	65.737	68.3645	-1.21655	1.12483
AC107027.3	3	131455126	131458599	-	14.8764	2.52965	1.5951	1.65293	0.282703	0.54057	0.776321	-0.365275	-1.28813	1.63332	2.10392	-2.0142	1.21391
AC107075.1	2	164573741	164574055	+	151.152	18.9707	16.7429	16.7946	0.925575	0.968064	1.0052	0.00747844	1.0052	16.0875	16.0043	-1.15196	1.16397
AC107081.2	2	61868432	61886083	+	10.5002	2.02498	1.04415	1.16669	0.0155249	0.101292	2.24149	1.16446	2.24149	1.53756	0.685956	1.15063	4.36656
AC107081.5	2	61878940	61881354	+	13.855	2.37051	1.4864	1.53944	0.388223	0.637324	1.25336	0.325805	1.25336	1.7289	1.37941	-1.35895	2.1348
AC107375.1	8	140505813	140508044	-	14.1045	2.29578	1.4964	1.56717	0.933516	0.970984	1.04356	0.0615166	1.04356	1.78226	1.70786	-1.63888	1.78478
AC107871.1	15	68184032	68229719	-	77.7498	9.99024	8.57731	8.63887	0.217952	0.47063	1.13593	0.183877	1.13593	9.56497	8.42037	-1.09395	1.41157
AC107959.1	8	22984596	23019336	-	32.1056	4.96065	3.48399	3.56728	0.638593	0.820795	0.941262	-0.0873316	-1.0624	3.15478	3.35165	-1.5387	1.36325
AC107959.4	8	23084355	23103559	+	36.9027	5.54662	4.05634	4.1003	0.746017	0.880015	0.943292	-0.0842235	-1.06012	4.18331	4.4348	-1.43891	1.28034
AC108010.1	7	128574751	128626474	+	25.4644	4.04486	2.74805	2.82938	0.117975	0.333436	1.36519	0.449106	1.36519	3.50024	2.56391	-1.0826	2.0177
AC108488.2	2	3532008	3558334	-	34.4419	6.16392	3.65839	3.82688	0.00536781	0.0521745	1.68423	0.752087	1.68423	5.19624	3.08523	1.17443	2.41532
AC108488.3	2	3568505	3575101	-	66.5537	8.461	7.33548	7.39486	0.222892	0.476995	1.15852	0.212288	1.15852	7.68112	6.63009	-1.09578	1.47074
AC109322.1	8	144078002	144079266	-	31.8338	5.0277	3.48162	3.53709	0.753831	0.885055	0.948656	-0.0760425	-1.05412	3.11724	3.28595	-1.44881	1.30386
AC109460.2	16	28952816	28966884	-	23.9032	3.55571	2.607	2.65591	0.0602873	0.227017	1.40464	0.490203	1.40464	2.9332	2.08822	-1.00782	1.98844
AC109460.3	16	28974804	28990776	+	23.2448	3.4431	2.48655	2.58276	0.224037	0.478376	1.24209	0.312775	1.24209	2.70967	2.18153	-1.29129	1.99221
AC110079.1	4	118591773	118633730	+	89.1933	13.1569	9.79788	9.91036	0.0524674	0.209665	1.2533	0.325736	1.2533	11.5315	9.20089	1.00821	1.55797
AC110285.6	17	81395609	81397145	-	11.6391	1.67393	1.27172	1.29323	0.806416	0.910983	1.06016	0.0842771	1.06016	1.43034	1.34918	-1.53086	1.72059
AC110994.3	3	101457241	101457733	-	11.8826	1.8649	1.26663	1.32029	0.985737	0.993483	0.976592	-0.0341724	-1.02397	1.30204	1.33325	-1.85808	1.77211
AC112128.1	3	113361901	113515152	-	16.4602	3.89328	1.63764	1.82892	0.0301751	0.151464	0.486741	-1.03877	-2.05448	1.263	2.59482	-3.86835	-1.09114
AC112220.2	3	33793644	33798540	-	21.2592	3.79442	2.25372	2.36214	0.167163	0.406713	0.720905	-0.472119	-1.38715	2.00827	2.78577	-2.29926	1.19493
AC112247.1	4	163932526	163933183	+	61.3187	8.09899	6.74176	6.81319	0.309903	0.564785	0.886266	-0.174189	-1.12833	6.53745	7.3764	-1.47713	1.16024
AC112777.1	12	20551590	20553013	+	398.021	60.9594	43.7184	44.2246	0.605801	0.802627	1.04683	0.0660293	1.04683	43.0341	41.1089	-1.16917	1.28124
AC113191.1	8	43125995	43126398	-	10.5583	2.07714	1.10155	1.17315	0.599876	0.798463	0.935653	-0.095954	-1.06877	1.29679	1.38598	-1.95531	1.71177
AC113398.1	5	124808828	124809234	-	59.1993	7.66521	6.47423	6.5777	0.864234	0.939068	0.98246	-0.0255287	-1.01785	6.77789	6.8989	-1.39052	1.34217
AC113404.3	5	76173629	76174184	-	174.274	20.8932	19.3373	19.3638	0.809047	0.912019	0.984005	-0.023263	-1.01626	19.548	19.8657	-1.16661	1.12959
AC113935.1	1	77129114	77129669	+	948.124	113.782	105.189	105.347	0.636521	0.819967	1.02295	0.0327412	1.02295	106.004	103.625	-1.08287	1.13315
AC114271.1	19	10333436	10336249	+	29.9501	4.29782	3.24178	3.32779	0.170636	0.412063	1.28245	0.358898	1.28245	3.40879	2.65804	-1.12123	1.84405
AC114490.2	1	34981533	35031742	-	26.8975	4.30999	2.75617	2.98862	0.699903	0.854419	1.08838	0.122184	1.08838	2.61897	2.4063	-1.61078	1.90809
AC114491.1	1	107505203	107505449	+	55.3327	7.04674	6.13409	6.14807	0.274441	0.531977	0.889081	-0.169613	-1.12476	5.82685	6.55379	-1.39958	1.10632
AC115223.1	4	65573459	65574329	+	535.43	68.1241	59.3933	59.4922	0.20179	0.452788	0.932823	-0.100324	-1.07201	57.4707	61.6095	-1.19233	1.03752
AC115837.1	8	74603244	74604245	-	289.59	35.3474	32.1338	32.1767	0.296803	0.551714	1.05733	0.0804237	1.05733	32.2943	30.5433	-1.05498	1.17941
AC116366.3	5	132410832	132646080	+	87.9423	15.8253	8.86835	9.77136	0.00682789	0.060963	1.98622	0.990024	1.98622	11.263	5.6706	1.26986	3.1067
AC116533.1	11	16974693	16975014	-	1931.83	225.304	214.462	214.647	0.756592	0.886377	1.0131	0.0187833	1.0131	212.106	209.362	-1.06722	1.09538
AC116913.1	15	66488658	66492110	-	9.68596	1.55609	1.02464	1.07622	0.518316	0.74372	0.82337	-0.280388	-1.21452	0.917377	1.11417	-2.31061	1.56645
AC117382.1	3	136736500	136737230	-	37.6202	5.33352	4.11153	4.18002	0.749391	0.882438	1.05815	0.0815425	1.05815	4.73302	4.47293	-1.26208	1.41312
AC118281.1	4	1391552	1395993	+	34.2986	5.07196	3.69919	3.81095	0.419444	0.665092	0.861715	-0.214718	-1.16048	3.60589	4.18455	-1.76674	1.3119
AC118344.1	19	40273489	40275480	-	11.3307	1.9876	1.2131	1.25896	0.644322	0.823405	0.889606	-0.168761	-1.12409	1.31531	1.47853	-1.92014	1.5196
AC118344.4	19	40355842	40360607	+	26.1372	4.33647	2.79582	2.90413	0.158332	0.39387	0.719935	-0.474061	-1.38901	2.403	3.33779	-2.18081	1.13033
AC118549.1	1	77562416	77683420	-	229.128	27.8834	25.4058	25.4587	0.995689	0.998303	0.998017	-0.00286427	-1.00199	25.6157	25.6666	-1.15279	1.14823
AC118553.2	1	99970011	100083322	+	58.3082	8.7932	6.19075	6.47869	0.424932	0.669215	1.09399	0.129594	1.09399	6.30915	5.76713	-1.44816	1.73317
AC119673.3	1	205813322	205896083	+	16.505	2.86434	1.76303	1.83389	0.441499	0.68444	0.883109	-0.179336	-1.13236	1.88263	2.13182	-1.8593	1.45003
AC119751.1	4	49550032	49557401	+	15.2472	2.29154	1.65328	1.69413	0.491347	0.724488	0.852916	-0.229524	-1.17245	1.57732	1.84933	-1.89919	1.3816
AC120057.2	17	7240427	7244636	-	82.3815	13.4498	8.85327	9.15349	0.0367708	0.170899	0.726548	-0.460871	-1.37637	8.22407	11.3194	-1.89829	1.00205
AC120057.3	17	7242200	7243815	+	26.6123	3.965	2.88685	2.95693	0.55503	0.771138	1.06946	0.0968792	1.06946	2.99868	2.80392	-1.42607	1.63105
AC120114.1	16	29926836	29928934	+	12.0913	2.11078	1.26184	1.34348	0.245156	0.5012	0.735009	-0.444167	-1.36053	1.33032	1.80993	-2.30969	1.24778
AC120114.3	16	29913144	29915338	-	12.5435	1.97544	1.32746	1.39373	0.261392	0.51988	1.37838	0.462973	1.37838	1.47867	1.07276	-1.27142	2.41561
AC121757.2	12	52298856	52306288	-	287.62	43.771	31.4918	31.9577	0.600043	0.798612	0.943853	-0.0833654	-1.05949	33.6852	35.6891	-1.27602	1.13675
AC122688.3	12	125138245	125141712	+	11.1358	1.89726	1.17217	1.23731	0.086079	0.278837	0.649801	-0.621931	-1.53893	1.08586	1.67106	-2.67545	1.12968
AC122718.1	5	61375112	61375856	+	37.0856	5.0827	4.07276	4.12062	0.607669	0.803255	1.09814	0.135057	1.09814	4.34123	3.95327	-1.26061	1.52017
AC124067.4	8	37597480	37599859	-	17.9206	3.34325	1.84971	1.99118	0.345061	0.600648	1.19899	0.261819	1.19899	2.43014	2.02683	-1.49597	2.15057
AC124798.1	11	17380649	17383532	+	29.0419	4.24708	3.1719	3.22688	0.786073	0.901327	0.982371	-0.0256604	-1.01795	3.26043	3.31895	-1.49159	1.43946
AC124944.2	3	195913078	195954486	-	18.9548	2.43931	2.09075	2.10609	0.75929	0.887764	0.942248	-0.0858216	-1.06129	2.05948	2.18571	-1.55864	1.38381
AC125232.1	2	87030675	87076430	-	68.7575	11.175	7.33116	7.63972	0.331028	0.587177	1.20435	0.268261	1.20435	9.27107	7.69795	-1.1952	1.7336
AC125611.3	12	49265156	49273307	-	885.492	124.928	97.7238	98.388	0.174307	0.416931	1.11627	0.15869	1.11627	105.448	94.4644	-1.05102	1.30964
AC125807.2	12	3041437	3044951	+	119.517	18.9641	13.0084	13.2796	0.116457	0.330767	1.14469	0.194953	1.14469	12.2971	10.7428	-1.04396	1.3679
AC126474.2	12	100032325	100034075	-	19.2031	2.86434	2.07136	2.13368	0.533629	0.755282	1.14214	0.191741	1.14214	2.48033	2.17165	-1.36495	1.78057
AC126755.1	16	18334400	18352477	-	286.381	42.2059	31.3638	31.8201	0.220542	0.473801	1.1347	0.182311	1.1347	36.1901	31.894	-1.07721	1.38696
AC126755.7	16	18318008	18344284	-	17.3749	3.04406	1.82742	1.93055	0.399692	0.648152	0.783321	-0.352325	-1.27662	1.54591	1.97353	-2.19618	1.34756
AC126773.5	16	68651056	68651949	-	13.466	1.9529	1.45123	1.49622	0.691522	0.850184	1.09336	0.128772	1.09336	1.68794	1.54381	-1.51628	1.81262
AC127496.7	17	81003335	81005133	+	15.5411	2.37881	1.67397	1.72678	0.315144	0.57059	0.77102	-0.37516	-1.29698	1.35972	1.76354	-2.05983	1.22451
AC127502.1	15	30470779	30507624	+	23.5	3.35923	2.5589	2.61111	0.811675	0.912904	1.03503	0.0496753	1.03503	2.94223	2.84265	-1.38246	1.48101
AC127502.2	15	30487963	30490314	+	24.0851	3.65448	2.61466	2.67612	0.65199	0.828304	1.09082	0.125416	1.09082	3.05912	2.80441	-1.34435	1.59964
AC128688.1	3	112185480	112185999	-	10.8746	1.73741	1.15178	1.20829	0.460833	0.699117	0.823548	-0.280075	-1.21426	1.20312	1.4609	-2.19164	1.48644
AC129492.1	17	8079482	8081566	+	23.4265	3.65804	2.53849	2.60295	0.847247	0.930903	0.979812	-0.0294231	-1.0206	2.82102	2.87914	-1.51674	1.45612
AC130689.1	17	1858039	1858447	-	27.7553	3.95238	3.02215	3.08393	0.833784	0.92405	0.98765	-0.0179281	-1.0125	2.9556	2.99256	-1.507	1.47001
AC131206.1	12	7438780	7439991	-	17.4595	2.51085	1.90208	1.93995	0.634987	0.81904	0.917744	-0.123837	-1.08963	1.90333	2.07392	-1.70522	1.43623
AC131212.3	12	132550729	132554948	+	16.1612	2.3552	1.72918	1.79569	0.589089	0.791364	0.910865	-0.134691	-1.09786	1.76494	1.93765	-1.87513	1.55575
AC131235.2	3	184149704	184150436	+	180.952	25.0394	19.9633	20.1058	0.0290545	0.148223	0.822765	-0.281448	-1.21541	18.2589	22.1921	-1.44214	-1.02434
AC132008.2	3	197578213	197627907	-	43.2689	6.71188	4.66831	4.80765	0.244189	0.500002	0.814755	-0.295562	-1.22736	4.73515	5.81174	-1.72997	1.1484
AC132812.1	17	64750420	64751312	+	12.5648	2.07714	1.35479	1.39609	0.120627	0.337407	1.48454	0.570017	1.48454	1.61707	1.08927	-1.10326	2.43143
AC132872.4	17	82249067	82251845	+	19.42	3.12357	2.10083	2.15778	0.0509076	0.206651	0.670003	-0.57776	-1.49253	1.72518	2.57489	-2.25667	1.01303
AC132872.5	17	82273748	82279646	+	11.0596	1.63987	1.19591	1.22884	0.556185	0.771395	1.16286	0.21768	1.16286	1.37186	1.17973	-1.48122	2.00298
AC132938.4	17	82454140	82458522	-	9.81175	1.55541	1.03638	1.09019	0.7562	0.886098	0.83865	-0.253858	-1.19239	0.960212	1.14495	-2.29086	1.61124
AC133644.2	2	87455476	87767360	+	33.5014	6.51025	3.47962	3.72238	0.0334069	0.161126	0.676212	-0.564453	-1.47883	2.36965	3.50431	-2.11219	-1.03538
AC134878.2	Y	11153858	11215027	-	14.7539	1.96783	1.57483	1.63932	0.654071	0.829307	1.10385	0.14255	1.10385	1.80463	1.63484	-1.5826	1.92839
AC135048.4	16	30984630	30988271	-	36.4883	6.80597	3.8252	4.05426	0.252869	0.509711	0.832257	-0.264899	-1.20155	2.88162	3.46241	-1.68339	1.166
AC135050.1	16	31056460	31062804	+	30.0683	4.16583	3.24687	3.34093	0.574674	0.78285	1.10242	0.140674	1.10242	3.33047	3.02106	-1.38728	1.68601
AC135050.6	16	31122235	31124065	+	13.628	2.43931	1.47118	1.51422	0.863601	0.93877	0.915817	-0.126868	-1.09192	1.5601	1.70351	-1.80017	1.50984
AC135050.7	16	31093727	31095945	+	37.6029	6.02656	4.07907	4.17809	0.29417	0.549798	1.19294	0.254522	1.19294	4.79663	4.02084	-1.20848	1.7198
AC135977.1	11	49433480	49434439	-	20.6964	2.98248	2.25469	2.2996	0.347957	0.603613	1.16965	0.226078	1.16965	2.64803	2.26395	-1.27502	1.74433
AC135983.3	15	32519848	32536927	-	13.5187	2.73418	1.42035	1.50208	0.546833	0.763961	1.25464	0.327276	1.25464	1.87197	1.49203	-1.39668	2.19855
AC136632.1	5	178055604	178056195	+	302.261	53.841	32.9784	33.5845	0.596312	0.79682	1.05826	0.0816956	1.05826	31.6174	29.8768	-1.18033	1.32187
AC137932.1	16	89296128	89298318	+	10.4364	1.67168	1.04725	1.1596	0.228101	0.48282	0.707343	-0.499519	-1.41374	1.11811	1.58072	-2.81861	1.41024
AC138028.2	16	88731180	88741426	+	18.7198	2.69315	2.02367	2.07998	0.0526576	0.210029	0.675063	-0.566906	-1.48134	1.64943	2.44338	-2.26002	1.02991
AC138028.4	16	88718615	88720460	+	45.6742	6.24574	4.98974	5.07491	0.170404	0.41164	0.832406	-0.264641	-1.20134	4.51666	5.42603	-1.65473	1.14656
AC138150.2	17	45168800	45171585	-	27.6983	5.52997	2.87237	3.07759	0.0168062	0.105705	1.72425	0.785968	1.72425	4.43322	2.57111	1.13085	2.62903
AC138356.2	8	37747338	37748005	-	16.5524	2.29578	1.75083	1.83915	0.16206	0.39982	1.34155	0.423898	1.34155	2.14248	1.59702	-1.31114	2.35972
AC138392.1	1	77810861	77811782	-	143.293	19.0689	15.8506	15.9215	0.871443	0.943601	1.01649	0.0235978	1.01649	15.4638	15.2129	-1.16851	1.20737
AC138776.1	22	11827523	11910359	+	24.1731	3.11785	2.66932	2.6859	0.813852	0.913543	0.968993	-0.0454414	-1.032	2.68216	2.76799	-1.45537	1.36652
AC138866.2	5	70197255	70207746	-	35.5687	5.17848	3.81777	3.95208	0.137518	0.363859	1.24646	0.317832	1.24646	4.99036	4.00364	-1.1062	1.71865
AC138932.1	16	14911551	14935709	+	446.402	62.5025	49.1197	49.6002	0.491101	0.724349	1.05494	0.0771601	1.05494	54.7174	51.8678	-1.09544	1.21911
AC138969.1	16	16317444	16350591	+	517.64	71.8807	57.1907	57.5155	0.0829287	0.272621	1.11922	0.162499	1.11922	63.552	56.7822	-1.01279	1.26869
AC138969.3	16	16356224	16377508	+	664.998	86.3118	73.582	73.8887	0.00127831	0.0197464	1.18027	0.239114	1.18027	82.8932	70.2326	1.07977	1.29011
AC139256.3	16	15104723	15131602	-	49.526	8.30614	5.2985	5.50289	0.396273	0.645118	1.15683	0.210175	1.15683	5.49495	4.75002	-1.30899	1.75175
AC139426.1	15	32313126	32315655	-	10.0608	1.63048	1.04364	1.11787	0.974188	0.989618	0.88352	-0.178665	-1.13184	1.05955	1.19924	-2.32811	1.81734
AC139530.1	17	81701324	81703301	-	58.9907	8.81931	6.4785	6.55453	0.853721	0.934941	0.964604	-0.0519918	-1.0367	6.58776	6.82949	-1.37952	1.28359
AC139795.1	5	177619059	177672210	-	12.8686	1.91062	1.37867	1.42984	0.334003	0.58963	1.27318	0.34844	1.27318	1.64627	1.29304	-1.35799	2.20129
AC139795.2	5	177611240	177619755	+	30.5935	5.35669	3.25691	3.39927	0.110253	0.320949	1.37272	0.457033	1.37272	4.25276	3.09807	-1.11308	2.09742
AC139887.2	4	760202	781860	-	14.6581	4.43594	1.37184	1.62867	0.0665212	0.239827	0.513612	-0.96125	-1.947	1.37968	2.68623	-3.62264	-1.04642
AC140479.2	2	110360608	110363738	-	33.2377	4.8101	3.61219	3.69307	0.0138673	0.0952522	1.49773	0.582779	1.49773	4.27841	2.85659	1.09239	2.05348
AC140479.4	2	110245591	110285857	+	18.4907	3.48955	1.88862	2.05453	0.829339	0.921231	0.998135	-0.00269262	-1.00187	2.12134	2.1253	-1.97161	1.96426
AC140479.5	2	110279606	110285682	+	46.8943	9.06354	4.96125	5.21048	0.455205	0.695067	0.782805	-0.353276	-1.27746	4.28703	5.4765	-1.99292	1.22123
AC141586.1	16	2603350	2630495	+	95.717	11.924	10.6127	10.6352	0.194539	0.444969	0.894835	-0.160307	-1.11753	9.99609	11.1709	-1.32966	1.0647
AC144652.1	7	155295918	155297542	-	19.4919	2.84237	2.13538	2.16577	0.187558	0.436473	1.25955	0.332912	1.25955	2.60942	2.07171	-1.13711	1.80399
AC145207.5	17	81878425	81881107	-	27.5476	4.09169	3.02782	3.06084	0.677995	0.843155	1.09112	0.125811	1.09112	3.13092	2.86946	-1.29717	1.54434
AC145207.8	17	81922899	81924512	+	13.5055	2.37051	1.45332	1.50061	0.0529648	0.210482	1.56963	0.650426	1.56963	1.93121	1.23036	-1.0162	2.50366
AC145285.6	16	28822431	28823970	-	107.739	16.0963	11.7569	11.9709	0.00854146	0.0706835	1.32155	0.402226	1.32155	14.7779	11.1823	1.08543	1.60903
AC146944.3	5	70449636	70450354	+	13.7085	2.38122	1.44748	1.52317	0.383457	0.633189	1.4002	0.485631	1.4002	1.74153	1.24378	-1.28348	2.51633
AC148477.2	12	132277349	132280901	+	36.5485	7.00018	3.8629	4.06095	0.216942	0.469436	0.799871	-0.322161	-1.2502	2.97905	3.72441	-1.81066	1.15845
AC148477.3	12	132275391	132278330	+	11.6965	1.95316	1.25835	1.29961	0.872977	0.943979	1.0086	0.012361	1.0086	1.16789	1.15793	-1.68123	1.71029
AC159540.2	2	97281356	97291850	+	20.5677	3.12739	2.20091	2.2853	0.178062	0.42198	0.744523	-0.425613	-1.34314	1.89039	2.53906	-2.15572	1.19494
AC211476.10	7	73065529	73077354	+	22.2018	3.2619	2.39397	2.46687	0.42863	0.672752	1.13706	0.185315	1.13706	2.96658	2.60898	-1.28255	1.65823
AC211486.6	7	75316048	75327766	-	12.0664	1.97394	1.28177	1.34071	0.772104	0.894995	0.970873	-0.042646	-1.03	1.23262	1.26961	-1.8658	1.75869
AC232271.1	X	49273054	49275769	+	11.9807	2.00629	1.28307	1.33119	0.378876	0.629605	1.28774	0.364841	1.28774	1.51603	1.17728	-1.348	2.23534
AC233723.2	17	4787057	4789163	+	17.2067	3.17033	1.82153	1.91186	0.896463	0.955058	1.07257	0.101074	1.07257	2.17254	2.02554	-1.57156	1.80794
AC234775.2	X	101537485	101539277	-	33.9618	4.44364	3.74401	3.77353	0.367186	0.621757	0.881897	-0.181318	-1.13392	3.46208	3.92572	-1.53829	1.19639
AC234917.3	8	143829518	143832862	+	49.5314	7.11132	5.46517	5.50348	0.351131	0.606942	1.13019	0.176571	1.13019	5.91742	5.23575	-1.15147	1.47082
AC239868.1	1	149861271	149862505	+	9.72351	1.42124	1.01493	1.08039	0.0507378	0.206137	1.76487	0.819566	1.76487	1.36676	0.774421	-1.04997	3.27043
AC241585.1	1	145233001	145233520	+	77.1714	9.57068	8.53349	8.5746	0.345535	0.601206	0.912676	-0.131825	-1.09568	8.39603	9.19935	-1.35494	1.12863
AC242376.2	15	23309607	23314567	+	28.429	4.33647	3.06117	3.15878	0.544481	0.762751	1.10494	0.14397	1.10494	3.48259	3.15183	-1.39084	1.69807
AC243919.1	15	82372196	82372913	-	2057.47	246.04	228.308	228.608	0.0348208	0.165422	0.923088	-0.115459	-1.08332	214.947	232.857	-1.16625	-1.00629
AC243960.2	19	41506152	41506899	+	76.7011	10.3932	8.43234	8.52234	0.686407	0.847577	0.94004	-0.0892056	-1.06378	8.33095	8.86233	-1.39131	1.22946
AC243964.3	19	44631573	44725218	-	10.9379	1.56024	1.1802	1.21533	0.634354	0.818716	1.10161	0.13961	1.10161	1.39424	1.26564	-1.54327	1.87282
AC244090.1	X	154424380	154428480	-	13.0034	1.78311	1.42825	1.44483	0.776841	0.89697	0.941292	-0.0872863	-1.06237	1.38116	1.4673	-1.68836	1.49593
AC244102.4	X	152574677	152698701	-	11.5085	1.78076	1.16518	1.27873	0.230964	0.485944	1.31795	0.398291	1.31795	1.35049	1.0247	-1.60838	2.79372
AC244197.3	X	149477104	149540927	-	38.8092	5.5312	4.2445	4.31214	0.375088	0.626937	0.860641	-0.216516	-1.16192	3.93781	4.57544	-1.63188	1.20874
AC245041.1	10	47970043	47973497	-	266.742	34.6911	29.4759	29.638	0.0914782	0.288449	0.90393	-0.145717	-1.10628	29.7961	32.9628	-1.24806	1.01978
AC245041.2	10	47908064	47991878	-	244.965	32.5723	27.1111	27.2184	0.00860843	0.0710332	0.846609	-0.240232	-1.18118	25.7543	30.4205	-1.32748	-1.05101
AC245052.4	19	54119511	54125344	-	30.1606	4.34789	3.2755	3.35117	0.996541	0.998696	1.01625	0.0232566	1.01625	3.59651	3.539	-1.44667	1.49407
AC245060.4	22	22303224	22310402	+	38.8807	5.23497	4.29378	4.32007	0.193105	0.442818	0.841626	-0.248748	-1.18818	3.88525	4.61636	-1.55884	1.10418
AC245060.7	22	22298124	22329123	+	30.6691	6.11591	3.22024	3.40768	0.0150266	0.0999321	1.80203	0.849626	1.80203	4.51194	2.5038	1.17109	2.77292
AC245100.2	1	148435105	148436927	+	19.366	2.94591	2.10031	2.15178	0.459462	0.698297	1.19669	0.259048	1.19669	2.12363	1.77458	-1.2587	1.80254
AC245100.8	1	148458814	148459872	+	9.91793	1.45242	1.0237	1.10199	0.0761434	0.258948	1.62483	0.700286	1.62483	1.37961	0.849083	-1.21934	3.21915
AC245140.2	X	154396878	154398817	-	25.9054	3.70687	2.81706	2.87838	0.509626	0.737826	0.902753	-0.147596	-1.10772	2.68434	2.97351	-1.66688	1.35845
AC246787.1	14	105978520	105979147	-	48.9271	6.75393	5.37793	5.43634	0.201847	0.452801	0.841453	-0.249045	-1.18842	4.70911	5.5964	-1.55035	1.09772
ACAA1	3	38103129	38137243	-	353.368	41.7269	39.2166	39.2631	0.404176	0.652404	0.956764	-0.0637646	-1.04519	38.0063	39.7238	-1.16671	1.06801
ACAA2	18	49782164	49813954	-	359.504	44.4355	39.8609	39.9448	0.95934	0.983647	0.996258	-0.00540827	-1.00376	40.6313	40.7839	-1.13428	1.12581
ACACA	17	37084992	37406837	-	917.728	114.457	101.596	101.97	0.597793	0.797218	0.978105	-0.0319388	-1.02239	106.011	108.385	-1.12119	1.07263
ACACB	12	109116595	109268227	+	181.421	24.995	20.0111	20.1578	0.505084	0.734789	0.948543	-0.0762145	-1.05425	20.8903	22.0235	-1.23381	1.1101
ACAD10	12	111686053	111757108	+	166.716	22.2178	18.4053	18.5239	0.00957734	0.0759736	0.803751	-0.315179	-1.24417	16.7774	20.8738	-1.45304	-1.06532
ACAD11	3	132558138	132660083	-	63.9674	8.64124	6.99973	7.10749	0.563013	0.775564	0.899288	-0.153145	-1.11199	6.28084	6.98424	-1.47031	1.18906
ACAD8	11	134253548	134265856	+	80.7261	12.2583	8.83247	8.96956	0.10599	0.313691	0.79683	-0.327656	-1.25497	8.16586	10.2479	-1.63746	1.03969
ACAD9	3	128879596	128916068	+	278.612	34.4346	30.9053	30.9569	0.619268	0.810753	0.972366	-0.0404283	-1.02842	31.3409	32.2316	-1.15524	1.09227
ACADL	2	210187126	210225448	-	13.1164	1.78311	1.43686	1.45738	0.545424	0.762888	1.12419	0.168888	1.12419	1.66783	1.48358	-1.38431	1.7495
ACADM	1	75724347	75787576	+	165.588	21.953	18.2899	18.3986	0.965796	0.985771	0.990978	-0.0130756	-1.0091	17.6887	17.8497	-1.21136	1.1896
ACADS	12	120725774	120740009	+	152.805	19.5787	16.8503	16.9783	0.395748	0.644448	0.922694	-0.116075	-1.08378	16.1326	17.4842	-1.33477	1.13637
ACADSB	10	123008979	123058291	+	195.207	25.2172	21.5347	21.6897	0.220151	0.473385	0.918937	-0.121963	-1.08821	22.1678	24.1233	-1.25655	1.06109
ACADVL	17	7217125	7225267	+	1788.84	211.128	198.552	198.76	0.188507	0.437887	0.951971	-0.0710111	-1.05045	197.419	207.379	-1.13592	1.02943
ACAP1	17	7336529	7351478	+	11.94	2.11078	1.27828	1.32667	0.770186	0.893884	0.913626	-0.130324	-1.09454	1.38853	1.5198	-1.87952	1.56886
ACAP2	3	195274745	195443045	-	246.81	31.7099	27.3408	27.4234	0.755899	0.886041	0.981406	-0.0270781	-1.01895	27.4662	27.9865	-1.18109	1.13758
ACAP3	1	1292390	1309610	-	407.269	51.4847	45.0575	45.2521	0.146288	0.376896	0.926034	-0.110862	-1.07987	45.8032	49.4616	-1.20154	1.03037
ACAT1	11	108116695	108147604	+	271.743	33.6627	30.0644	30.1937	0.00624592	0.0573488	1.19373	0.255472	1.19373	31.9531	26.7675	1.06046	1.34374
ACAT2	6	159762045	159779113	+	172.723	22.5708	19.0553	19.1914	0.0333422	0.161006	1.18205	0.241289	1.18205	21.8171	18.457	1.01263	1.3798
ACBD3	1	226144679	226186742	-	446.163	52.4217	49.5378	49.5736	0.994337	0.997949	0.999574	-0.000614041	-1.00043	49.6061	49.6272	-1.10616	1.10522
ACBD4	17	45132600	45144182	+	128.544	17.2843	14.0014	14.2827	0.772359	0.895104	0.970282	-0.0435234	-1.03063	15.5838	16.0611	-1.28155	1.20652
ACBD5	10	27195214	27242131	-	504.706	67.513	55.6704	56.0784	0.021339	0.123412	1.17249	0.229581	1.17249	57.519	49.057	1.02762	1.3378
ACBD6	1	180269653	180502955	-	444.797	56.8163	49.2549	49.4219	0.40753	0.655246	0.941758	-0.0865722	-1.06184	48.1098	51.0851	-1.21904	1.08117
ACBD7	10	15075475	15088777	-	25.2282	4.34585	2.64393	2.80313	0.0012632	0.0195762	2.03716	1.02656	2.03716	3.52288	1.72931	1.39009	2.98544
ACCS	11	44065925	44084238	+	123.935	15.6447	13.6756	13.7706	0.719863	0.865434	0.974863	-0.036729	-1.02579	13.021	13.3567	-1.25426	1.192
ACD	16	67657512	67660816	-	317.192	43.1612	35.0157	35.2436	0.834996	0.924491	1.01855	0.0265138	1.01855	37.7516	37.0641	-1.12518	1.16731
ACER2	9	19409009	19452506	+	37.4902	5.66562	4.11049	4.16557	0.162353	0.400061	0.796379	-0.328473	-1.25568	3.57464	4.48862	-1.7041	1.08078
ACER3	11	76860867	77026798	+	483.606	58.8507	53.6019	53.734	0.147142	0.378146	0.9229	-0.115753	-1.08354	50.4731	54.6897	-1.21199	1.03231
ACIN1	14	23058564	23095615	-	1451.4	175.15	160.905	161.266	0.0092091	0.0744083	1.11067	0.151435	1.11067	164.277	147.907	1.03045	1.19715
ACKR3	2	236567787	236582355	+	32.5369	7.13704	3.30597	3.61522	7.15351e-05	0.00250652	0.38334	-1.3833	-2.60865	2.04915	5.34552	-3.76309	-1.80837
ACLY	17	41866917	41930543	-	9925.13	1205.38	1100.4	1102.79	0.828115	0.920441	1.00936	0.0134422	1.00936	1147.52	1136.88	-1.07838	1.09866
ACO1	9	32384603	32454770	+	440.347	54.8934	48.7805	48.9274	0.0305445	0.15284	0.895062	-0.15994	-1.11724	44.5004	49.7176	-1.23379	-1.0117
ACO2	22	41469117	41528990	+	865.923	109.785	95.9413	96.2137	0.0217573	0.124578	1.11153	0.152551	1.11153	104.796	94.2804	1.0176	1.21413
ACOT1	14	73537143	73543797	+	60.4393	8.64433	6.44705	6.71548	0.567566	0.778971	1.10306	0.141512	1.10306	7.97733	7.232	-1.27353	1.54956
ACOT11	1	54542257	54639193	+	42.1317	6.41645	4.53212	4.6813	0.178163	0.422078	1.24512	0.316281	1.24512	5.75273	4.62023	-1.12912	1.7505
ACOT13	6	24667035	24705066	+	372.538	46.7663	41.0323	41.3931	0.000142693	0.0040353	1.30338	0.382263	1.30338	44.8227	34.3894	1.1653	1.45783
ACOT2	14	73567620	73575659	+	590.599	77.7486	65.1749	65.6221	0.757862	0.887251	0.982386	-0.0256387	-1.01793	69.6757	70.925	-1.13421	1.0946
ACOT4	14	73591706	73596497	+	15.0469	2.4051	1.61717	1.67187	0.998429	0.999751	1.01553	0.0222393	1.01553	1.91361	1.88434	-1.54457	1.59293
ACOT7	1	6264269	6394392	-	539.642	66.5968	59.8073	59.9602	0.210712	0.462355	0.944456	-0.0824441	-1.05881	55.7694	59.0492	-1.16147	1.03603
ACOT8	20	45841721	45857406	-	89.7102	11.6477	9.88541	9.9678	0.61421	0.808183	0.950143	-0.073784	-1.05247	10.0407	10.5676	-1.32657	1.19759
ACOT9	X	23701055	23766476	-	501.752	58.6167	55.6894	55.7503	0.265869	0.523949	0.951867	-0.0711687	-1.05057	55.5719	58.382	-1.15121	1.04305
ACOX1	17	75941507	75979178	-	314.544	39.8809	34.8198	34.9494	0.0308372	0.153916	0.884559	-0.17697	-1.13051	34.1503	38.6072	-1.26233	-1.01245
ACOX2	3	58505136	58537284	-	28.2788	4.56907	3.04624	3.14209	0.530861	0.75307	1.09913	0.136365	1.09913	3.50655	3.19029	-1.39027	1.67958
ACOX3	4	8366282	8440724	-	108.627	14.4547	11.9959	12.0697	0.253291	0.510155	0.887878	-0.171567	-1.12628	11.0274	12.42	-1.37258	1.08204
ACP1	2	264140	278284	+	930.216	106.441	103.316	103.357	0.554575	0.770873	1.02219	0.0316569	1.02219	105.251	102.967	-1.0589	1.10641
ACP2	11	47239302	47248907	-	366.732	49.8932	40.3685	40.748	0.0158584	0.102263	1.14682	0.197637	1.14682	39.7964	34.7016	1.03101	1.27564
ACP6	1	147629652	147670525	-	92.0599	13.1498	10.1059	10.2289	0.0258315	0.138398	0.772327	-0.372716	-1.29479	9.10784	11.7927	-1.61877	-1.03565
ACSF2	17	50426158	50474846	+	69.1849	8.85487	7.61098	7.68721	0.212031	0.463706	1.16112	0.215516	1.16112	8.20462	7.06613	-1.11526	1.50359
ACSF3	16	89088375	89164122	+	256.103	31.994	28.3977	28.4559	0.491217	0.724446	1.04474	0.0631383	1.04474	28.8203	27.5862	-1.09368	1.19372
ACSL1	4	184755595	184826819	-	145.66	19.8751	16.1075	16.1845	0.048494	0.199846	0.846132	-0.241046	-1.18185	14.9567	17.6766	-1.39155	-1.00375
ACSL3	2	222860942	222944640	+	1135.23	137.206	125.669	126.137	0.00370622	0.0414728	1.15879	0.212623	1.15879	131.396	113.39	1.05573	1.27192
ACSL4	X	109624244	109733404	-	357.921	48.3327	39.4742	39.769	0.0362153	0.169306	0.846032	-0.241217	-1.18199	35.1872	41.5909	-1.37578	-1.0155
ACSM3	16	20610243	20797582	+	50.2381	7.40035	5.4408	5.58201	0.00605577	0.056371	1.44683	0.532895	1.44683	5.87446	4.06023	1.13273	1.84802
ACSS1	20	25006230	25058981	-	323.331	39.3255	35.8585	35.9257	0.87944	0.94681	0.991632	-0.0121237	-1.00844	36.6661	36.9755	-1.13417	1.11527
ACSS2	20	34872146	34927963	+	167.989	21.9956	18.4867	18.6654	0.172393	0.414355	0.877539	-0.188465	-1.13955	17.0634	19.4447	-1.40646	1.08308
ACTA2	10	88935074	88991340	-	204.965	34.2514	21.9872	22.7739	0.562337	0.775142	0.937491	-0.0931227	-1.06668	18.4123	19.64	-1.33463	1.173
ACTB	7	5527148	5563785	-	88032.4	10728.1	9762.88	9781.38	0.723186	0.867509	0.98473	-0.0222004	-1.01551	10084.4	10240.7	-1.10831	1.07472
ACTBP11	1	223863726	223864852	-	11.553	2.14139	1.23511	1.28367	0.080649	0.267885	0.622375	-0.684144	-1.60675	0.993328	1.59603	-2.71277	1.05079
ACTBP2	5	77784881	77786004	+	86.9416	11.6162	9.60818	9.66018	0.22202	0.475838	0.884481	-0.177097	-1.13061	9.20691	10.4094	-1.39236	1.08925
ACTG1	17	81509971	81523848	-	62285.9	7631.81	6904.04	6920.66	0.381682	0.631479	0.965221	-0.0510683	-1.03603	7097.89	7353.64	-1.12642	1.04943
ACTG1P20	1	27325329	27325797	+	141.988	20.2721	15.6104	15.7765	0.486599	0.720296	1.07575	0.105345	1.07575	17.1383	15.9315	-1.1557	1.33743
ACTG1P9	6	46204729	46207387	+	10.9354	1.96783	1.16566	1.21504	0.61596	0.808708	1.16626	0.221883	1.16626	1.41919	1.21688	-1.52296	2.07145
ACTL6A	3	179562886	179588408	+	317.214	38.1522	35.172	35.246	0.120763	0.337526	1.08949	0.123659	1.08949	37.5899	34.5021	-1.02861	1.22096
ACTN1	14	68874143	68979441	-	7401.9	1008.8	815.783	822.434	3.02251e-06	0.000193845	0.789623	-0.340765	-1.26643	766.209	970.348	-1.35711	-1.18181
ACTN4	19	38647649	38731590	+	23303	2921.42	2585.28	2589.22	0.00535689	0.0521743	0.890404	-0.167468	-1.12309	2464.87	2768.26	-1.21114	-1.04143
ACTN4P1	4	116598161	116599612	+	19.2685	2.71033	2.08702	2.14094	0.196873	0.447228	0.774966	-0.367796	-1.29038	1.90753	2.46143	-2.01062	1.20752
ACTR10	14	58200080	58235637	+	223.956	28.1865	24.7368	24.884	0.00768366	0.0656263	0.813591	-0.297624	-1.22912	22.0975	27.1605	-1.42064	-1.06341
ACTR1A	10	102461881	102502713	-	1215	155.569	134.603	135	0.0206889	0.120722	0.908297	-0.138764	-1.10096	133.804	147.313	-1.19146	-1.01733
ACTR1B	2	97655939	97664045	-	457.75	56.211	50.7317	50.8611	0.0422386	0.184606	0.895609	-0.15906	-1.11656	49.0516	54.7691	-1.24217	-1.00365
ACTR2	2	65227753	65271254	+	3191.21	380.332	354.185	354.579	0.0955301	0.295847	0.936783	-0.0942135	-1.06748	339.312	362.21	-1.15522	1.01377
ACTR3	2	113890063	113962597	+	2410.19	283.22	267.618	267.799	0.100574	0.304626	0.941601	-0.0868126	-1.06202	258.15	274.16	-1.14198	1.01249
ACTR3B	7	152759749	152855379	+	66.535	8.74555	7.34286	7.39277	0.86074	0.937698	1.02382	0.033965	1.02382	7.9125	7.7284	-1.2194	1.27819
ACTR5	20	38748460	38772521	+	114.043	15.5065	12.5088	12.6714	0.059849	0.226023	1.22269	0.290059	1.22269	14.5958	11.9374	-1.02193	1.52776
ACTR6	12	100199122	100241866	+	85.4605	11.8936	9.39962	9.49561	0.211899	0.463706	1.14386	0.193907	1.14386	9.54061	8.34073	-1.09168	1.42836
ACTR8	3	53867066	53882153	-	142.198	18.0531	15.7689	15.7998	0.288233	0.545419	0.924503	-0.113251	-1.08166	15.3738	16.6293	-1.25868	1.0758
ACTRT3	3	169766921	169769562	-	15.5408	2.23188	1.69289	1.72675	0.540431	0.759479	1.15354	0.206069	1.15354	1.97847	1.71513	-1.35439	1.80223
ACVR1	2	157736444	157876331	-	250.819	31.7024	27.808	27.8688	0.777562	0.897361	1.02028	0.0289621	1.02028	28.6744	28.1045	-1.12028	1.16617
ACVR1B	12	51951699	51997079	+	302.052	38.6987	33.4426	33.5613	0.0622555	0.230803	1.13484	0.182485	1.13484	35.5388	31.3162	-1.00742	1.29741
ACVR2A	2	147844517	147930827	+	50.2228	7.22881	5.49194	5.58031	0.853564	0.93484	0.972016	-0.0409486	-1.02879	5.34853	5.50251	-1.42401	1.34542
ACVR2B	3	38453890	38493143	+	81.1944	9.69524	8.97735	9.0216	0.702792	0.855642	1.02944	0.0418634	1.02944	8.94542	8.68958	-1.20776	1.27993
ACY1	3	51983340	51989198	+	232.358	30.2365	25.694	25.8176	0.050623	0.205845	0.881306	-0.182286	-1.13468	25.3621	28.7779	-1.28653	-1.00075
ACYP1	14	75053237	75069484	-	19.6117	2.56179	2.15351	2.17908	0.791636	0.903021	0.946721	-0.0789894	-1.05628	2.21082	2.33524	-1.56274	1.40065
ACYP2	2	53970838	54305301	+	37.5175	5.85538	4.0895	4.16861	0.341656	0.596904	1.17837	0.236797	1.17837	4.40473	3.73797	-1.20703	1.67604
ADA	20	44619522	44652234	-	273.997	34.6598	30.3705	30.4441	0.373201	0.625675	0.944484	-0.0824021	-1.05878	30.0909	31.8597	-1.20749	1.07714
ADAL	15	43330657	43354556	+	53.4024	6.88141	5.89459	5.9336	0.739055	0.875722	1.03831	0.0542394	1.03831	6.39803	6.16195	-1.22097	1.31632
ADAM10	15	58588809	58749792	-	1129.8	142.462	124.9	125.534	0.810178	0.912363	0.987551	-0.0180734	-1.01261	129.951	131.589	-1.15424	1.12568
ADAM11	17	44758988	44781847	+	24.2913	4.24708	2.5205	2.69903	0.219067	0.471974	1.29963	0.3781	1.29963	3.3203	2.55481	-1.36486	2.30529
ADAM12	10	126012381	126388456	-	98.8622	15.9905	10.7541	10.9847	0.0218325	0.124791	0.748212	-0.41848	-1.33652	10.1747	13.5987	-1.6823	-1.06181
ADAM15	1	155050566	155062776	+	1318.73	159.831	146.357	146.525	0.204399	0.455113	0.953385	-0.0688697	-1.04889	139.594	146.419	-1.1334	1.03019
ADAM17	2	9488486	9556733	-	554.223	65.2196	61.5354	61.5803	0.620061	0.81106	1.02116	0.0302065	1.02116	63.3185	62.0065	-1.07051	1.11629
ADAM19	5	157395534	157575776	-	123.414	23.1274	12.5158	13.7127	6.20637e-08	7.68626e-06	0.382514	-1.38642	-2.61428	8.38197	21.9129	-3.2122	-2.12766
ADAM22	7	87934143	88202890	+	34.4014	5.76552	3.68765	3.82237	0.788824	0.902186	0.97926	-0.0302356	-1.02118	4.2802	4.37085	-1.46421	1.4041
ADAM23	2	206443532	206621128	+	144.235	20.2182	15.8786	16.0261	0.0204768	0.120069	0.797418	-0.326592	-1.25405	13.7914	17.2951	-1.50491	-1.045
ADAM8	10	133262420	133276869	-	23.1259	3.25238	2.53873	2.56955	0.784985	0.901087	0.952364	-0.0704153	-1.05002	2.51603	2.64188	-1.53546	1.39266
ADAM9	8	38996869	39105262	+	2936.42	377.003	324.681	326.269	4.17069e-06	0.000254962	0.792439	-0.335629	-1.26193	291.44	367.776	-1.35372	-1.17636
ADAMTS10	19	8580240	8610736	-	238.752	33.3359	26.1028	26.528	0.0898772	0.285343	0.809753	-0.304447	-1.23495	23.7391	29.3165	-1.57462	1.03248
ADAMTS12	5	33523535	33892020	-	44.2032	8.58086	4.59051	4.91147	0.00111695	0.0181067	0.511887	-0.966104	-1.95356	3.66738	7.16443	-2.80015	-1.36292
ADAMTS13	9	133414358	133459403	+	10.891	2.29578	1.15784	1.21011	0.15331	0.386734	1.54578	0.628338	1.54578	1.5905	1.02893	-1.11139	2.65561
ADAMTS15	11	130448974	130476642	+	56.5453	10.9314	5.69424	6.28282	0.00100199	0.016849	0.585718	-0.771721	-1.70731	5.69664	9.72591	-2.27202	-1.28295
ADAMTS16	5	5140330	5320305	+	15.199	3.25477	1.51139	1.68878	0.958109	0.983157	1.05903	0.0827405	1.05903	2.16186	2.04136	-1.61006	1.80574
ADAMTS7	15	78759206	78811465	-	96.7236	12.6463	10.4993	10.7471	9.74713e-05	0.00309111	0.635749	-0.653471	-1.57295	7.79607	12.2628	-1.89272	-1.3072
ADAMTS8	11	130404923	130428610	-	10.5885	2.17297	1.08992	1.1765	0.625873	0.814209	0.966815	-0.0486882	-1.03432	1.31121	1.35621	-2.01692	1.88528
ADAMTS9	3	64515654	64688001	-	315.165	44.8166	33.8447	35.0183	0.251232	0.508051	1.0754	0.104869	1.0754	42.2642	39.301	-1.06182	1.22797
ADAMTSL4	1	150549369	150560938	+	60.0858	13.4536	5.88776	6.6762	0.00620808	0.0572767	0.657633	-0.604645	-1.5206	3.52478	5.35979	-2.02769	-1.14033
ADAMTSL5	19	1505022	1513605	-	62.9488	8.04045	6.95845	6.99431	0.420483	0.66581	0.918319	-0.122932	-1.08895	6.92312	7.5389	-1.36622	1.15215
ADAP2	17	30906344	30959323	+	34.5876	6.35209	3.60794	3.84306	0.000134376	0.0038609	0.465687	-1.10257	-2.14737	2.64553	5.68092	-2.95698	-1.55942
ADARB1	21	45073853	45226561	+	28.5105	3.79442	3.12487	3.16783	0.0802148	0.267145	0.751989	-0.411217	-1.32981	2.79189	3.71267	-1.84055	1.04081
ADAT1	16	75596981	75623301	-	207.595	25.4763	22.9791	23.0661	0.48818	0.72182	1.0449	0.0633631	1.0449	24.6455	23.5865	-1.09679	1.19749
ADAT2	6	143422832	143450696	-	32.4095	4.8969	3.46101	3.60105	0.083761	0.274165	1.43498	0.521035	1.43498	4.16658	2.90357	-1.07613	2.21594
ADAT3	19	1905399	1913448	+	110.541	14.0435	12.1582	12.2823	0.559286	0.772998	1.05691	0.0798464	1.05691	12.0022	11.356	-1.18527	1.324
ADCK1	14	77800109	77935015	+	62.9912	8.85487	6.89607	6.99902	0.0180398	0.11061	1.36601	0.449966	1.36601	7.78837	5.70155	1.06934	1.74498
ADCK2	7	140672945	140696262	+	327.113	43.684	36.0152	36.3459	0.109272	0.319603	0.91406	-0.129639	-1.09402	37.6294	41.1672	-1.22425	1.02287
ADCK5	8	144373101	144393243	+	109.32	14.2642	12.0941	12.1467	0.554565	0.770873	0.95052	-0.0732111	-1.05206	12.2906	12.9304	-1.26139	1.13965
ADCY1	7	45574140	45723117	+	469.666	66.306	51.4022	52.1851	5.38716e-05	0.00197905	0.754475	-0.406456	-1.32543	48.6075	64.4256	-1.47615	-1.19009
ADCY3	2	24819169	24919840	-	1317.52	156.809	146.161	146.391	0.019038	0.114579	0.902173	-0.148525	-1.10844	138.348	153.35	-1.20543	-1.01924
ADCY5	3	123282296	123449759	-	47.7402	9.66659	4.73951	5.30447	0.000153776	0.00425653	0.372221	-1.42577	-2.68657	2.67619	7.18979	-4.05701	-1.77907
ADCY6	12	48766194	48789038	-	436.142	58.6549	47.3538	48.4602	0.201564	0.452788	0.92834	-0.107275	-1.07719	53.0113	57.1034	-1.21325	1.0456
ADCY7	16	50246137	50318136	+	432.434	65.0814	46.9592	48.0482	0.0163587	0.104125	0.812586	-0.299408	-1.23064	37.7165	46.4155	-1.44473	-1.04828
ADCY9	16	3953387	4116443	-	1143.45	147.58	126.469	127.05	0.397949	0.646712	1.0554	0.0777859	1.0554	135.232	128.134	-1.07485	1.19724
ADD1	4	2843857	2930077	+	1349.56	163.634	149.762	149.951	0.956929	0.98255	0.996775	-0.00465968	-1.00324	153.959	154.457	-1.08501	1.07803
ADD2	2	70607618	70768226	-	1082.87	143.421	119.788	120.319	0.304191	0.558752	0.943002	-0.0846673	-1.06044	121.879	129.245	-1.18802	1.05645
ADD3	10	109996368	110135566	+	246.772	33.9981	27.0076	27.4191	0.25517	0.511948	1.14153	0.190973	1.14153	30.2457	26.4957	-1.11744	1.45614
ADGRA2	8	37784191	37844897	+	101.125	13.6069	11.0585	11.2362	0.110413	0.321022	0.852016	-0.231047	-1.17369	9.41073	11.0452	-1.46387	1.06267
ADGRA3	4	22345071	22516067	-	305.008	42.393	32.7832	33.8898	0.700625	0.854622	0.973882	-0.0381805	-1.02682	38.879	39.9217	-1.17842	1.11767
ADGRB1	8	142449430	142545010	+	12.6848	1.9997	1.35526	1.40943	0.145409	0.375838	0.680404	-0.555536	-1.46971	1.18237	1.73774	-2.50004	1.15739
ADGRB2	1	31727117	31764894	-	139.641	21.5013	15.1419	15.5157	0.00421626	0.044759	0.749335	-0.416318	-1.33452	14.7643	19.7032	-1.6036	-1.11058
ADGRE5	19	14380501	14408726	+	671.326	86.5914	74.3785	74.5917	0.589499	0.791764	0.975473	-0.0358268	-1.02514	70.6916	72.4691	-1.13558	1.08056
ADGRF4	6	47685864	47722022	+	141.944	27.2637	14.4602	15.7716	0.20312	0.453888	0.871823	-0.197892	-1.14702	10.3509	11.8727	-1.41414	1.07485
ADGRG1	16	57610652	57665581	+	1125.7	194.072	112.672	125.078	0.202573	0.453368	0.822467	-0.28197	-1.21585	140.097	170.337	-1.68837	1.1421
ADGRG2	X	18989307	19122638	-	127.766	22.4108	13.5819	14.1962	0.0165289	0.104681	1.48484	0.570311	1.48484	18.3355	12.3484	1.06785	2.06468
ADGRG6	6	142301854	142446267	+	761.877	101.724	84.1231	84.653	0.000630992	0.0123668	0.837116	-0.256501	-1.19458	81.3528	97.1822	-1.30384	-1.09447
ADGRL1	19	14147743	14206188	-	147.228	20.3651	16.1663	16.3587	0.010109	0.0785853	1.23273	0.301855	1.23273	19.507	15.8242	1.05916	1.43475
ADGRL2	1	81306147	81992437	+	533.524	72.9977	58.8002	59.2805	0.901402	0.958302	1.01109	0.0159089	1.01109	63.7994	63.0998	-1.12854	1.1537
ADH5	4	99070978	99088802	-	627.81	77.4586	69.6041	69.7566	0.308671	0.563953	1.05183	0.0729056	1.05183	69.3747	65.956	-1.05164	1.16348
ADH5P4	6	65836930	65838040	-	10.9292	1.89726	1.18829	1.21435	0.498482	0.730529	0.827611	-0.272976	-1.2083	1.13734	1.37424	-2.03453	1.39353
ADH6	4	99202638	99219538	-	26.131	4.59146	2.64571	2.90344	0.614972	0.808516	1.26346	0.337385	1.26346	3.48702	2.75989	-1.55079	2.47559
ADI1	2	3497366	3519532	-	717.576	94.9132	79.1226	79.7307	0.0802505	0.267145	0.881846	-0.181401	-1.13398	78.2194	88.6996	-1.31135	1.01977
ADIPOR1	1	202940826	202958573	-	804.14	94.834	89.2171	89.3489	0.626199	0.814209	0.981104	-0.0275217	-1.01926	91.4359	93.197	-1.10567	1.06428
ADIPOR2	12	1688574	1788675	+	829.428	106.66	91.7184	92.1587	0.200761	0.451705	1.06632	0.0926367	1.06632	100.424	94.1786	-1.03569	1.17762
ADIRF-AS1	10	86965345	86971312	-	36.9073	6.50944	3.99449	4.10081	0.0958462	0.296623	1.34212	0.424519	1.34212	5.04915	3.76206	-1.04493	1.88223
ADK	10	74151202	74709964	+	279.539	41.2223	30.5091	31.0599	0.222257	0.476004	0.930306	-0.104223	-1.07492	26.0067	27.955	-1.21686	1.05316
ADM	11	10305073	10307398	+	643.05	90.9645	70.4461	71.4501	0.0832984	0.273398	1.1907	0.251804	1.1907	73.4043	61.6482	-1.02077	1.4472
ADM2	22	50481543	50486441	+	34.4553	5.11018	3.7381	3.82836	0.74779	0.881348	1.03148	0.0447227	1.03148	4.35196	4.21912	-1.33146	1.41662
ADM5	19	49688664	49690576	+	77.2472	10.6242	8.42699	8.58303	0.0500876	0.204173	1.27747	0.353291	1.27747	9.94128	7.782	-1.03259	1.68511
ADNP	20	50888916	50931438	-	1021.73	122.327	113.314	113.526	0.516962	0.742564	1.02567	0.036567	1.02567	119.133	116.152	-1.0581	1.11312
ADNP2	18	80109262	80147524	+	481.235	57.4683	53.3882	53.4706	0.0251622	0.136418	1.11626	0.158674	1.11626	56.164	50.3144	1.01521	1.22737
ADO	10	62804720	62808480	+	454.41	57.2794	50.3977	50.49	0.0117087	0.0857329	0.882571	-0.180216	-1.13305	48.0184	54.4074	-1.24259	-1.03317
ADORA1	1	203090654	203167406	+	42.5705	9.91812	4.18432	4.73006	0.00588381	0.0555732	0.565378	-0.822711	-1.76873	4.25319	7.52273	-2.53547	-1.23385
ADORA2B	17	15944917	15975747	+	160.047	20.923	17.6207	17.783	0.0916488	0.288734	1.14279	0.192563	1.14279	20.2602	17.7287	-1.03049	1.34579
ADPGK	15	72751369	72785847	-	862.709	110.001	95.3089	95.8566	0.000213641	0.00545144	1.21754	0.283971	1.21754	100.585	82.6136	1.1167	1.32749
ADPRH	3	119579268	119589946	+	42.0713	6.14336	4.50318	4.67459	0.476636	0.712122	1.12004	0.163556	1.12004	4.43793	3.96228	-1.32061	1.65671
ADPRHL1	13	113399610	113453525	-	113.738	16.7745	12.4452	12.6376	0.0167806	0.10564	0.768659	-0.379585	-1.30097	11.6208	15.1183	-1.6103	-1.05106
ADPRM	17	10697594	10711559	+	20.9922	2.76012	2.29353	2.33247	0.322149	0.578565	1.1794	0.238058	1.1794	2.37193	2.01113	-1.25106	1.74022
ADPRS	1	36088892	36093933	+	282.116	44.6055	30.577	31.3462	0.300816	0.555364	0.936684	-0.0943663	-1.0676	25.6414	27.3747	-1.22733	1.07683
ADRA1B	5	159865080	159973013	+	171.914	26.8835	17.862	19.1016	0.456418	0.695657	0.940666	-0.0882456	-1.06308	22.6754	24.1057	-1.25667	1.11197
ADRA1D	20	4220630	4249288	-	146.258	19.4406	16.0234	16.2509	0.251167	0.508051	1.1395	0.188401	1.1395	17.5319	15.3856	-1.13212	1.47001
ADRA2C	4	3766348	3768527	+	113.048	15.8858	12.3689	12.5608	0.30335	0.557707	0.917334	-0.124481	-1.09012	13.3288	14.5299	-1.29416	1.08904
ADRB1	10	114043866	114046905	+	15.3122	2.66623	1.63332	1.70135	0.147711	0.378931	0.708008	-0.498163	-1.41241	1.54543	2.18279	-2.28178	1.1438
ADRM1	20	62302093	62308863	+	1542.9	198.023	170.877	171.433	0.0439066	0.188851	1.12047	0.164102	1.12047	179.845	160.509	1.00318	1.25147
ADSL	22	40346500	40390464	+	703.045	83.611	77.9541	78.1161	0.0616649	0.229621	1.09541	0.131474	1.09541	79.8144	72.8624	-1.00408	1.20482
ADSS1	14	104724186	104747326	+	36.1415	5.79396	3.87381	4.01572	0.285932	0.543342	1.27321	0.348475	1.27321	4.69165	3.68489	-1.19453	1.93642
ADSS2	1	244408494	244451910	-	409.34	48.7272	45.4271	45.4822	0.959928	0.983891	1.00259	0.00372642	1.00259	46.5302	46.4101	-1.10539	1.11112
AEBP2	12	19404045	19720802	+	235.559	31.7468	26.0097	26.1733	0.112733	0.324749	1.11363	0.155269	1.11363	25.8699	23.2303	-1.02617	1.27263
AEN	15	88621337	88632282	+	1562.47	185.542	173.473	173.608	0.89197	0.953071	0.995537	-0.00645281	-1.00448	171.358	172.127	-1.09084	1.08113
AF001548.2	16	15726674	15732994	+	13.0427	2.11743	1.40809	1.44919	0.743525	0.878483	0.89787	-0.155422	-1.11375	1.39887	1.55799	-1.88479	1.51946
AF106564.1	8	24912165	24914718	-	19.7957	2.53191	2.16667	2.19952	0.452852	0.693223	1.1523	0.204511	1.1523	2.4938	2.1642	-1.28791	1.71006
AF111167.2	14	75423683	75427742	-	17.3991	3.16204	1.83375	1.93323	0.857345	0.936412	0.922113	-0.116984	-1.08447	2.10093	2.27839	-1.80533	1.53506
AF117829.1	8	89585872	89757813	-	43.4572	6.62926	4.65373	4.82858	0.932485	0.970615	0.997889	-0.00304914	-1.00212	4.20754	4.21644	-1.45081	1.44469
AF127577.4	21	14818843	15014431	-	28.9869	5.48943	3.03346	3.22077	0.0314832	0.155901	0.642863	-0.637416	-1.55554	2.10197	3.26969	-2.29871	-1.05264
AF131216.4	8	11283481	11285069	-	12.9633	1.94288	1.40081	1.44036	0.417739	0.663707	1.20771	0.27228	1.20771	1.62103	1.34223	-1.38595	2.02152
AF201337.1	8	69129598	69130346	+	437.607	56.5735	48.3621	48.623	0.144395	0.374436	0.922492	-0.116392	-1.08402	49.3511	53.4976	-1.21321	1.03243
AFAP1	4	7758714	7939927	-	965.557	120.94	106.607	107.284	0.631353	0.816906	0.980683	-0.0281418	-1.0197	114.074	116.321	-1.1092	1.06676
AFAP1-AS1	4	7754077	7778929	+	27.4836	5.73471	2.79521	3.05374	0.768349	0.892545	1.06382	0.0892483	1.06382	3.34534	3.14466	-1.82793	2.06868
AFAP1L1	5	149271859	149343638	+	48.5425	8.24654	5.20093	5.39361	0.00156086	0.022536	0.594185	-0.751015	-1.68298	4.30371	7.24304	-2.24666	-1.26072
AFAP1L2	10	114294824	114404757	-	258.237	47.7002	26.5721	28.693	5.0849e-06	0.000294775	0.489265	-1.03131	-2.04388	21.6439	44.2377	-2.55193	-1.63698
AFDN	6	167826922	167972024	+	598.673	76.318	66.2764	66.5192	0.796969	0.905702	0.984371	-0.0227262	-1.01588	68.4099	69.4961	-1.14692	1.11135
AFF1	4	86935002	87141055	+	547.858	71.2791	60.5493	60.8731	0.957039	0.98255	0.993143	-0.00992617	-1.0069	61.3093	61.7326	-1.18399	1.16781
AFF4	5	132875395	132963635	-	1135.22	136.867	125.909	126.135	0.156136	0.390571	0.935454	-0.0962612	-1.069	123.336	131.846	-1.17876	1.0315
AFG1L	6	108294991	108526797	+	19.7458	2.88281	2.17039	2.19398	0.254993	0.511948	1.2367	0.306494	1.2367	2.49048	2.01381	-1.17664	1.79959
AFG3L1P	16	89972586	90002162	+	252.08	34.8648	27.803	28.0088	0.00373272	0.0414728	1.26652	0.340869	1.26652	31.5162	24.8841	1.0949	1.46504
AFG3L2	18	12328944	12377228	-	614.212	80.3525	67.8376	68.2458	0.227869	0.482755	1.06673	0.0931978	1.06673	74.8109	70.131	-1.04714	1.19156
AFMID	17	78187317	78207702	+	122.775	15.8244	13.5777	13.6417	0.513962	0.740651	0.937248	-0.0934967	-1.06695	13.2094	14.0938	-1.2936	1.13635
AFTPH	2	64524305	64593006	+	330.067	41.1949	36.4848	36.6741	0.399899	0.648178	1.05092	0.0716478	1.05092	39.6589	37.7375	-1.07899	1.19167
AGA	4	177430774	177442438	-	113.434	14.654	12.5548	12.6038	0.0799552	0.26684	0.863769	-0.211283	-1.15772	11.3683	13.1613	-1.36711	1.01999
AGAP1	2	235494043	236131801	+	688.355	95.5028	73.8672	76.4839	0.036455	0.169761	0.902534	-0.147947	-1.10799	84.7781	93.9334	-1.21858	-1.00744
AGAP12P	10	48009873	48031641	-	10.7993	1.45246	1.17753	1.19992	0.87895	0.946607	0.975162	-0.0362859	-1.02547	1.28295	1.31562	-1.69445	1.61133
AGAP14P	10	46337224	46358715	+	21.9534	4.03258	2.33699	2.43927	0.564945	0.776461	1.20455	0.268498	1.20455	2.89118	2.40021	-1.34169	1.94672
AGAP2-AS1	12	57726271	57728357	+	360.868	43.9695	39.9545	40.0964	0.144336	0.374436	1.09754	0.134267	1.09754	41.4124	37.7322	-1.04431	1.25795
AGAP3	7	151085831	151144437	+	636.639	76.3355	70.6488	70.7377	0.562693	0.775337	1.02667	0.0379775	1.02667	72.7662	70.8757	-1.07438	1.13246
AGAP4	10	45825594	45853876	-	38.3335	6.65118	4.16047	4.25927	0.0999937	0.303573	1.3348	0.416623	1.3348	5.18718	3.88611	-1.04151	1.85566
AGAP5	10	73674285	73698160	-	18.2233	2.95999	1.91097	2.02481	0.0264986	0.140521	0.593014	-0.753861	-1.6863	1.4902	2.51292	-2.81078	-1.01168
AGAP6	10	49982190	50010500	+	68.549	9.81729	7.52086	7.61656	0.611466	0.806344	1.07831	0.108774	1.07831	8.34523	7.73916	-1.20835	1.40501
AGAP7P	10	46109621	46131359	+	81.8509	12.4281	8.9376	9.09454	0.0640929	0.235428	1.29149	0.369037	1.29149	10.7896	8.35437	-1.00118	1.66991
AGAP9	10	47501854	47523639	-	78.1673	11.0961	8.59429	8.68526	0.077856	0.2628	1.23288	0.302028	1.23288	9.88834	8.02055	-1.02254	1.55425
AGBL2	11	47659591	47715390	-	12.2552	2.18646	1.31303	1.36169	0.265557	0.523561	1.34035	0.42261	1.34035	1.59083	1.18688	-1.28839	2.31464
AGBL3	7	134986508	135147964	+	17.9752	2.99949	1.92356	1.99725	0.351757	0.607226	0.783457	-0.352075	-1.27639	1.77907	2.2708	-2.10965	1.29491
AGBL5	2	27042364	27070623	+	421.842	54.5706	46.6795	46.8713	0.872901	0.943979	0.994478	-0.00798881	-1.00555	49.1023	49.375	-1.12729	1.11487
AGFG1	2	227472152	227561215	+	1229.49	149.622	136.395	136.609	0.0401109	0.179559	1.09734	0.134011	1.09734	142.543	129.898	1.00462	1.19861
AGFG2	7	100539203	100568221	+	178.581	26.411	19.5679	19.8423	0.0881479	0.282797	0.859353	-0.218677	-1.16367	19.9238	23.1846	-1.3844	1.02236
AGGF1	5	77029251	77065235	+	363.209	44.0501	40.2717	40.3566	0.402219	0.650651	1.04899	0.0689983	1.04899	42.1137	40.147	-1.07438	1.18222
AGK	7	141551278	141655245	+	270.093	32.8895	29.9474	30.0104	0.534735	0.755888	0.964042	-0.0528314	-1.0373	29.9967	31.1155	-1.18043	1.09707
AGL	1	99850361	99924024	+	175.292	21.3879	19.4375	19.4769	0.319485	0.57573	1.06954	0.0969912	1.06954	20.5727	19.2351	-1.07466	1.22932
AGMAT	1	15571699	15585052	-	214.301	33.9417	23.0852	23.8112	3.76566e-06	0.000233179	1.58125	0.661066	1.58125	32.2494	20.3949	1.3792	1.81291
AGMO	7	15200317	15562016	-	11.3425	2.51085	1.14781	1.26028	0.0933105	0.292048	1.6908	0.757707	1.6908	1.66936	0.987317	-1.16622	3.334
AGO1	1	35869808	35930533	+	415.073	51.7077	45.9574	46.1192	0.151914	0.384767	0.92466	-0.113005	-1.08148	45.9842	49.7309	-1.21436	1.03828
AGO2	8	140520156	140635634	-	996.504	130.308	108.36	110.723	0.923875	0.967707	0.996931	-0.0044351	-1.00308	125.784	126.171	-1.08151	1.07488
AGO3	1	35930718	36072501	+	120.663	14.816	13.3809	13.4069	0.405147	0.653678	0.940909	-0.0878735	-1.0628	13.3711	14.2108	-1.24123	1.09888
AGO4	1	35808016	35857891	+	43.6306	6.23363	4.77222	4.84784	0.264728	0.523192	0.852492	-0.230241	-1.17303	4.71237	5.52775	-1.59521	1.15931
AGPAT1	6	32168212	32178097	-	828.245	97.2877	91.8494	92.0273	0.661279	0.833355	0.984689	-0.0222596	-1.01555	95.2374	96.7182	-1.09313	1.05991
AGPAT2	9	136673143	136687458	-	771.65	97.2032	85.1026	85.7389	0.208239	0.459294	1.06234	0.0872457	1.06234	94.9059	89.3366	-1.04163	1.17554
AGPAT3	21	43865223	43987593	+	1507.55	204.387	165.791	167.505	0.00613751	0.0568481	1.1223	0.166452	1.1223	160.144	142.693	1.03864	1.21268
AGPAT4	6	161129967	161274062	-	41.2358	5.66562	4.54818	4.58176	0.982244	0.992678	0.992043	-0.0115248	-1.00802	4.73773	4.77573	-1.33635	1.31517
AGPAT5	8	6708642	6761504	+	504.549	64.1422	55.5471	56.061	0.93308	0.970984	0.995575	-0.00639845	-1.00444	60.9814	61.2525	-1.10244	1.09271
AGPS	2	177392757	177559300	+	812.527	99.8318	90.0675	90.2808	0.376788	0.627946	0.960498	-0.058146	-1.04113	91.4894	95.2521	-1.14603	1.05728
AGR2	7	16791811	16833434	-	267.651	42.3063	28.6501	29.7389	0.000286929	0.00682054	1.42568	0.511653	1.42568	39.9278	28.0061	1.21374	1.67464
AGRN	1	1020120	1056119	+	7589.58	940.942	842.101	843.287	0.896178	0.955058	0.99247	-0.0109047	-1.00759	851.533	857.994	-1.1041	1.08754
AGTPBP1	9	85546539	85742030	-	91.4529	11.5139	10.1127	10.1614	0.272141	0.5304	0.901288	-0.14994	-1.10952	9.52182	10.5647	-1.35993	1.1047
AGTRAP	1	11736084	11754803	+	492.665	61.7656	54.5352	54.7406	0.0018024	0.0250007	0.842207	-0.247753	-1.18736	48.7125	57.8391	-1.30689	-1.07876
AHCTF1	1	246839098	246931949	-	807.225	99.2071	89.5663	89.6917	0.0650538	0.237228	1.07748	0.107656	1.07748	95.463	88.5988	-1.00492	1.16666
AHCTF1P1	2	161500885	161507706	-	279.916	33.1186	31.0535	31.1018	0.190664	0.440207	1.07812	0.108514	1.07812	32.5339	30.1766	-1.04436	1.2139
AHCY	20	34280268	34311803	-	3267.15	380.79	362.822	363.017	0.408092	0.655741	0.971669	-0.0414637	-1.02916	361.083	371.611	-1.10682	1.04499
AHCYL1	1	109984765	110023743	+	867.413	103.979	96.1998	96.3792	0.586455	0.789598	0.97315	-0.0392657	-1.02759	96.4157	99.0759	-1.14273	1.08219
AHCYL2	7	129225023	129430212	+	155.476	19.7617	17.2175	17.2751	0.511054	0.738595	1.05098	0.071742	1.05098	17.5662	16.714	-1.12578	1.2435
AHDC1	1	27534035	27604432	-	383.928	54.9392	41.5733	42.6586	0.0645513	0.236447	0.892321	-0.164366	-1.12067	45.9333	51.4763	-1.26932	1.01068
AHI1	6	135283532	135497766	-	100.992	12.7903	11.1691	11.2213	0.311637	0.566778	1.08966	0.123882	1.08966	12.2186	11.2132	-1.09954	1.30556
AHNAK	11	62433542	62556236	-	8271.99	1217.42	896.464	919.11	1.39587e-05	0.000685466	0.731175	-0.451712	-1.36766	866.695	1185.35	-1.51976	-1.23079
AHNAK2	14	104937244	104978375	-	11370.1	1739.93	1230.34	1263.34	3.20619e-07	3.01047e-05	0.659165	-0.601289	-1.51707	1102.33	1672.31	-1.67981	-1.3701
AHR	7	16916359	17346153	+	329.445	46.5447	36.0263	36.605	0.000174998	0.00470791	1.29848	0.376821	1.29848	45.2063	34.8148	1.15993	1.45357
AHRR	5	271670	438292	+	22.1059	3.55571	2.34705	2.45621	0.627621	0.814545	0.932002	-0.101595	-1.07296	2.66724	2.86184	-1.7022	1.47858
AHSA1	14	77457870	77469473	+	1209.83	144.187	134.359	134.426	0.77598	0.89648	1.01091	0.0156522	1.01091	135.029	133.572	-1.07195	1.09547
AHSA2P	2	61177418	61191204	+	217.176	28.9453	23.984	24.1306	0.45751	0.696494	1.0617	0.086381	1.0617	26.1689	24.648	-1.09809	1.23779
AIDA	1	222668013	222713211	-	594.233	75.6546	65.7938	66.0258	0.407828	0.6555	1.03933	0.0556491	1.03933	63.895	61.4773	-1.06186	1.14702
AIDAP1	2	11308025	11308942	+	23.1707	3.57675	2.51494	2.57452	0.17619	0.419446	1.29482	0.372753	1.29482	2.9013	2.24069	-1.1621	1.94834
AIDAP2	4	158270378	158278677	+	15.5077	2.09698	1.69556	1.72308	0.541929	0.760437	0.900789	-0.150739	-1.11014	1.60484	1.78159	-1.74862	1.41886
AIF1L	9	131096476	131123153	+	19.4186	3.34272	2.01338	2.15762	0.246311	0.502486	0.747145	-0.420539	-1.33843	2.1073	2.82046	-2.23643	1.24843
AIFM1	X	130129362	130165888	-	590.839	71.494	65.5308	65.6487	0.130426	0.352463	1.07621	0.105958	1.07621	69.3732	64.4607	-1.02654	1.18896
AIFM2	10	70098223	70132935	-	786.601	99.9168	87.1567	87.4001	0.0660752	0.238982	1.1041	0.142866	1.1041	93.5204	84.7031	-1.00779	1.22853
AIFM3	22	20965108	20981361	+	12.2275	1.96783	1.30966	1.35861	0.9376	0.972672	0.998188	-0.00261619	-1.00182	1.35527	1.35773	-1.778	1.77156
AIG1	6	143060496	143341059	+	96.5087	11.9851	10.6982	10.7232	0.509135	0.737599	0.942799	-0.0849778	-1.06067	10.3951	11.0258	-1.27422	1.13262
AIMP1	4	106315544	106349457	+	393.063	48.3298	43.5798	43.6737	0.0433709	0.187671	1.10962	0.150067	1.10962	47.1424	42.4851	1.0034	1.22708
AIMP2	7	6009255	6023835	+	504.471	63.1203	55.9181	56.0524	0.00719731	0.063011	1.14122	0.190577	1.14122	61.1962	53.6235	1.04258	1.24919
AIP	11	67483026	67491104	+	344.169	43.0715	38.0988	38.241	0.556528	0.771428	1.03348	0.0475119	1.03348	40.731	39.4115	-1.087	1.161
AJ009632.2	21	15368966	15627343	-	12.1981	2.29578	1.2352	1.35535	0.81321	0.913453	1.10436	0.143207	1.10436	1.71449	1.55248	-1.64745	2.00924
AJM1	9	136844415	136848802	+	143.415	17.8854	15.8859	15.935	0.239352	0.495609	1.09082	0.125413	1.09082	16.9379	15.5277	-1.07642	1.28082
AJUBA	14	22971177	22982552	-	1991.24	254.189	218.423	221.249	0.257874	0.515174	0.956882	-0.0635865	-1.04506	239.168	249.945	-1.1319	1.03639
AK1	9	127866486	127877676	-	169.103	26.5313	18.5124	18.7892	0.0514167	0.208013	0.800684	-0.320694	-1.24893	17.45	21.7939	-1.55448	-1.00344
AK2	1	33007940	33080997	-	948.544	119.038	105.131	105.394	0.319307	0.575699	1.04165	0.0588771	1.04165	102.83	98.7182	-1.04314	1.13185
AK3	9	4709556	4742044	-	498.321	63.5426	55.0822	55.369	0.00648321	0.058651	0.844076	-0.244555	-1.18473	52.3829	62.0594	-1.32812	-1.05682
AK4	1	65147549	65232146	+	720.882	109.247	78.2116	80.098	0.379969	0.630286	1.05767	0.0808834	1.05767	69.8521	66.0437	-1.06504	1.19141
AK4P1	17	31345519	31346191	+	111.495	17.5621	12.1303	12.3883	0.537501	0.757628	0.950837	-0.0727295	-1.0517	10.5477	11.093	-1.29963	1.17499
AK5	1	77282019	77559967	+	21.8872	4.01188	2.176	2.43191	0.00158259	0.0228039	0.402974	-1.31124	-2.48155	1.21715	3.02041	-4.01219	-1.53484
AK6	5	69350984	69370014	-	114.785	15.1475	12.6643	12.7539	0.0558196	0.217387	1.20181	0.265205	1.20181	13.8704	11.5413	-1.01055	1.45957
AK7	14	96392128	96489428	+	17.6427	2.76557	1.86382	1.9603	0.0984951	0.30106	1.43932	0.525382	1.43932	2.31632	1.60932	-1.17611	2.43646
AK9	6	109492856	109691218	-	12.6342	2.13888	1.35622	1.4038	0.0857641	0.278312	1.54417	0.626836	1.54417	1.79693	1.16368	-1.06177	2.53177
AKAP1	17	57085092	57121347	+	804.462	98.714	89.1296	89.3846	0.142116	0.370802	1.07267	0.101205	1.07267	95.7572	89.27	-1.02959	1.18466
AKAP10	17	19904302	19978344	-	226.415	28.3277	25.0889	25.1572	0.605361	0.802271	1.03251	0.0461601	1.03251	25.9326	25.116	-1.12019	1.19422
AKAP11	13	42272152	42323262	+	458.616	57.6377	50.848	50.9573	0.48304	0.717246	0.959308	-0.0599339	-1.04242	50.591	52.737	-1.17365	1.08007
AKAP12	6	151239967	151358560	+	1982.65	248.3	219.513	220.295	0.151363	0.383844	1.08837	0.122172	1.08837	231.392	212.604	-1.03817	1.22977
AKAP13	15	85380571	85749359	+	1312.29	165.949	145.147	145.81	0.398897	0.64752	0.951414	-0.0718547	-1.05107	147.356	154.881	-1.19208	1.07905
AKAP17A	X	1591604	1602521	+	426.02	51.3309	47.252	47.3356	0.651344	0.827852	1.02545	0.0362557	1.02545	48.6398	47.4327	-1.09379	1.15017
AKAP5	14	64465499	64474504	+	24.9629	4.06545	2.5177	2.77365	0.998933	0.99984	0.991379	-0.0124913	-1.0087	3.47654	3.50678	-1.44481	1.42
AKAP6	14	32329298	32837685	+	30.108	5.22126	3.19496	3.34533	0.0855484	0.278087	0.700038	-0.514494	-1.42849	3.07856	4.3977	-2.13463	1.04608
AKAP7	6	131135467	131283536	+	29.4373	4.27367	3.24102	3.27081	0.912226	0.963677	1.02876	0.0409013	1.02876	3.15184	3.06374	-1.34421	1.42263
AKAP8	19	15353385	15379799	-	324.149	41.8455	35.8669	36.0165	0.0162471	0.103828	1.16101	0.215375	1.16101	37.3936	32.2079	1.03291	1.30499
AKAP8L	19	15380050	15419142	-	304.96	36.3496	33.8229	33.8845	0.119807	0.336215	1.09057	0.125078	1.09057	34.6228	31.7475	-1.02548	1.21964
AKAP9	7	91940862	92110674	+	564.03	72.5409	62.3288	62.67	0.125832	0.344394	0.908848	-0.137889	-1.10029	62.3573	68.6114	-1.2508	1.03316
AKIP1	11	8911139	8920085	+	235.454	29.002	26.105	26.1615	0.0915454	0.288535	0.898819	-0.153898	-1.11257	24.4296	27.1797	-1.26058	1.01839
AKIRIN1	1	38991276	39006060	+	619.968	73.7898	68.8031	68.8854	0.12267	0.340538	1.07522	0.104627	1.07522	71.2597	66.2747	-1.02236	1.18195
AKIRIN2	6	87674860	87702234	-	447.329	54.7685	49.639	49.7032	0.232956	0.488561	1.05575	0.0782634	1.05575	52.428	49.6596	-1.03887	1.15793
AKNA	9	114334156	114394406	-	90.8674	12.353	9.94438	10.0964	0.00217136	0.0286707	1.43516	0.521212	1.43516	11.7203	8.16653	1.16468	1.76846
AKR1A1	1	45550543	45570050	+	336.881	42.5663	37.2985	37.4312	0.409018	0.656605	0.948076	-0.0769252	-1.05477	35.2234	37.1525	-1.2034	1.08168
AKR1B1	7	134442356	134459285	-	7085.66	877.293	783.042	787.296	2.1574e-05	0.000962794	0.798352	-0.324902	-1.25258	682.488	854.871	-1.35574	-1.15727
AKR1B10	7	134527567	134541413	+	27435.1	3512.32	3036.76	3048.35	0.329857	0.586149	1.06329	0.0885342	1.06329	3218.62	3027.04	-1.06588	1.20506
AKR1B10P1	10	67750284	67751226	+	742.621	99.1281	82.0664	82.5134	0.371791	0.624808	1.0696	0.0970672	1.0696	87.8548	82.1383	-1.08065	1.2363
AKR1B15	7	134549110	134579876	+	49.8157	7.2225	5.38095	5.53508	0.492923	0.726033	0.855985	-0.224342	-1.16824	5.1328	5.99637	-1.72977	1.26742
AKR1B1P2	3	74135959	74136893	+	13.2841	2.78606	1.41215	1.47601	0.194806	0.445214	0.65822	-0.603358	-1.51925	1.16604	1.7715	-2.58688	1.12078
AKR1C1	10	4963253	4983284	+	4743.1	603.269	521.009	527.011	0.927665	0.968631	1.00814	0.0116946	1.00814	540.926	536.559	-1.22934	1.24944
AKR1C2	10	4987400	5018032	-	23267.4	3029.66	2567.72	2585.27	0.247502	0.503914	1.09451	0.130284	1.09451	2747.42	2510.18	-1.07582	1.28878
AKR1C3	10	5035354	5107687	+	8804.86	1101.22	974.67	978.317	0.231654	0.486968	1.07336	0.102133	1.07336	1036.09	965.28	-1.05077	1.21059
AKR1C4	10	5195462	5218950	+	9.87801	1.63987	1.05388	1.09756	0.0412784	0.18232	1.70676	0.771258	1.70676	1.43963	0.843491	-1.00615	2.93094
AKR1E2	10	4786629	4848063	+	59.1657	8.36926	6.48232	6.57396	0.0241261	0.132897	1.31914	0.399595	1.31914	7.88966	5.98092	1.03617	1.67937
AKR7A2	1	19303965	19312147	-	307.997	37.7702	34.1404	34.2219	0.811206	0.912805	0.987558	-0.0180626	-1.0126	35.2809	35.7254	-1.13499	1.10692
AKT1	14	104769349	104795752	-	1812.42	207.833	201.317	201.38	0.777472	0.897338	0.990534	-0.0137223	-1.00956	201.168	203.091	-1.08582	1.06536
AKT1S1	19	49869033	49878460	-	1817.65	212.289	201.822	201.962	0.76494	0.890601	0.988742	-0.0163337	-1.01139	200.279	202.559	-1.09773	1.07315
AKT2	19	40230317	40285537	-	2223.08	268.344	246.74	247.009	0.466272	0.703814	0.968905	-0.0455732	-1.03209	241.615	249.369	-1.12633	1.05737
AKT3	1	243488233	243851080	-	486.518	62.9836	53.6142	54.0576	0.188578	0.437942	0.936145	-0.0951967	-1.06821	56.4574	60.3084	-1.18612	1.03948
AKTIP	16	53491040	53504412	-	150.807	20.2222	16.5904	16.7563	0.234195	0.489588	0.901177	-0.150118	-1.10966	17.0131	18.8787	-1.32529	1.07629
AL008721.2	22	25476218	25479972	+	11.0836	2.16828	1.16171	1.23151	0.369469	0.623566	0.7394	-0.435573	-1.35245	1.02798	1.39029	-2.53392	1.38533
AL009174.1	X	133670971	133671387	+	575.037	71.8896	63.7169	63.893	0.78547	0.901288	0.984795	-0.022105	-1.01544	61.6022	62.5534	-1.14159	1.10713
AL022311.1	22	37876148	37895564	+	52.4085	6.91138	5.8051	5.82316	0.919957	0.967291	1.01092	0.0156652	1.01092	5.63278	5.57195	-1.24363	1.27093
AL023775.1	6	166701094	166702840	-	46.4118	6.74108	5.11762	5.15687	0.734798	0.873867	0.948936	-0.0756178	-1.05381	5.25424	5.53698	-1.37543	1.23855
AL031274.1	1	171339299	171339960	+	36.242	6.32143	3.83511	4.02688	0.0738991	0.254955	1.30608	0.385248	1.30608	3.64394	2.78997	-1.03334	1.76272
AL031282.2	1	1702736	1737689	-	23.0462	4.35099	2.39858	2.56069	0.418623	0.664453	0.791788	-0.336814	-1.26296	2.59702	3.27995	-2.07821	1.30289
AL031284.1	1	25398721	25399199	+	73.8898	9.76007	8.17332	8.20997	0.443411	0.6856	1.08436	0.11685	1.08436	8.8076	8.12236	-1.13892	1.3392
AL031587.5	22	37943050	37944899	+	34.0134	4.97996	3.69999	3.77927	0.0133869	0.093403	0.668745	-0.580472	-1.49534	2.96362	4.43162	-2.04537	-1.09322
AL031600.3	16	1445343	1446520	+	17.9019	4.67044	1.46647	1.9891	0.411519	0.658184	0.88283	-0.179793	-1.13272	2.20279	2.49515	-3.67356	2.86313
AL031708.1	16	1632259	1686716	+	19.495	3.36822	2.08329	2.16611	0.642305	0.822842	1.09006	0.124402	1.09006	2.0171	1.85046	-1.47657	1.75449
AL031714.1	16	1317891	1322846	-	21.8504	3.33937	2.3436	2.42782	0.139951	0.367481	1.41209	0.49783	1.41209	2.70527	1.91579	-1.1061	2.20556
AL031729.1	1	27649419	27649611	+	15.6598	2.516	1.65857	1.73998	0.33691	0.592291	1.21122	0.276465	1.21122	2.11285	1.7444	-1.38956	2.03857
AL031847.2	1	6159430	6197758	-	323.986	40.925	35.8418	35.9984	0.740904	0.876612	1.02551	0.036337	1.02551	35.1207	34.2471	-1.12462	1.18273
AL033397.1	6	53561289	53617172	-	104.813	16.1711	11.321	11.6459	0.0591806	0.224383	0.747132	-0.420564	-1.33845	10.3768	13.8888	-1.83844	1.02623
AL033519.3	6	35555873	35556265	+	22.2185	3.42404	2.40693	2.46872	0.760031	0.888308	0.911126	-0.134277	-1.09754	2.27609	2.49811	-1.70738	1.41738
AL034370.1	X	44029332	44030922	+	48.7196	6.16588	5.36899	5.41329	0.0867898	0.280679	1.23398	0.303314	1.23398	5.8147	4.71217	-1.0439	1.58954
AL034397.1	X	65956289	65957197	-	21.751	3.26723	2.34547	2.41678	0.0153599	0.100851	1.62362	0.69921	1.62362	2.92598	1.80214	1.10863	2.37783
AL034430.1	20	10413520	10431923	-	29.5767	5.09251	2.03387	3.2863	0.0964756	0.298049	1.38419	0.469041	1.38419	3.88004	2.80312	-5.18196	9.92853
AL035252.4	20	25229150	25231934	+	13.3868	2.00599	1.43308	1.48742	0.781415	0.899403	0.91296	-0.131376	-1.09534	1.54895	1.69663	-1.85952	1.5499
AL035411.1	1	58630841	58631531	-	236.047	31.784	26.0938	26.2274	0.312473	0.567579	1.06952	0.0969573	1.06952	25.7437	24.0704	-1.07772	1.23277
AL035456.1	20	10612861	10614230	-	25.939	3.77432	2.84058	2.88211	0.40923	0.656798	1.12528	0.17028	1.12528	3.27515	2.91052	-1.25355	1.58731
AL035458.1	20	34245953	34246538	-	72.2613	10.0701	7.95735	8.02903	0.742737	0.877819	1.04886	0.0688238	1.04886	8.46173	8.06754	-1.22912	1.35217
AL035458.2	20	34234840	34281174	-	10.8215	1.76692	1.14344	1.20239	0.0757618	0.258342	1.62417	0.699699	1.62417	1.49855	0.922655	-1.09965	2.90079
AL035461.3	20	6000418	6000942	+	9.72205	1.69172	1.0313	1.08023	0.367025	0.621632	0.761214	-0.393626	-1.31369	0.861111	1.13123	-2.41095	1.39702
AL049629.2	11	33698261	33722468	-	52.8222	8.63113	5.71125	5.86914	0.44112	0.684075	0.890265	-0.167694	-1.12326	5.08206	5.70848	-1.59063	1.26068
AL049779.2	14	67799004	67799610	+	30.0646	4.39644	3.27335	3.34052	0.114195	0.327189	1.32654	0.407663	1.32654	3.96102	2.98599	-1.07245	1.88718
AL049830.3	14	30876179	30889809	-	11.7145	1.95417	1.25079	1.30162	0.334012	0.58963	0.756021	-0.403502	-1.32272	1.11503	1.47486	-2.34464	1.34012
AL049840.2	14	103682362	103684016	-	10.7228	2.13888	1.12116	1.19142	0.186692	0.435393	1.48212	0.567659	1.48212	1.60418	1.08236	-1.19848	2.63267
AL049840.4	14	103694516	103695051	-	13.3721	2.48647	1.2532	1.48579	0.751506	0.883554	0.893928	-0.161769	-1.11866	1.52967	1.71118	-2.87491	2.29736
AL049840.5	14	103694560	103695171	+	20.5503	3.5488	2.1981	2.28337	0.484838	0.718801	0.848423	-0.237144	-1.17866	2.17291	2.56112	-1.93784	1.3949
AL049840.6	14	103696353	103697164	+	49.6593	6.90928	5.46145	5.5177	0.0588471	0.223666	0.787775	-0.344144	-1.2694	5.06303	6.42699	-1.63206	1.01284
AL049873.1	14	58794654	58795030	+	46.1555	6.6814	5.0661	5.12839	0.958344	0.983257	1.00009	0.000128642	1.00009	5.36492	5.36444	-1.34854	1.34878
AL049873.2	14	58827679	58828177	-	16.3336	2.67462	1.69296	1.81485	0.0300054	0.151047	0.612644	-0.70688	-1.63227	1.525	2.48921	-2.76743	1.0387
AL050331.1	6	116258493	116259116	-	22.5808	3.03485	2.49295	2.50898	0.9317	0.970335	0.977124	-0.0333865	-1.02341	2.50051	2.55905	-1.46015	1.39411
AL050341.2	1	40256427	40257968	-	9.81305	1.44425	1.06267	1.09034	0.657574	0.831328	1.10119	0.139062	1.10119	1.22996	1.11694	-1.57302	1.90747
AL078621.1	2	113657908	113658676	+	184.739	24.3507	20.3872	20.5266	0.984007	0.99317	0.993839	-0.0089159	-1.0062	19.5222	19.6432	-1.20383	1.18905
AL080243.4	22	41064052	41064634	+	20.932	3.49437	2.26394	2.32578	0.0933907	0.292108	1.41013	0.495831	1.41013	2.86718	2.03327	-1.06569	2.1191
AL096711.2	6	127438406	127519002	-	107.993	17.6997	11.657	11.9992	0.000260682	0.00636738	1.65404	0.725996	1.65404	15.4111	9.31722	1.32101	2.07104
AL096870.2	14	24209646	24215988	-	16.2544	2.56442	1.72952	1.80605	0.764638	0.890573	1.02991	0.0425172	1.02991	1.78919	1.73723	-1.69003	1.79264
AL109615.3	6	43995723	44074653	-	10.3362	2.11743	1.01403	1.14847	0.299301	0.553807	0.698083	-0.51853	-1.43249	1.11175	1.59257	-2.97809	1.45128
AL109618.1	20	6213699	6215382	+	51.7198	6.99868	5.69275	5.74665	0.168454	0.408371	0.840072	-0.251415	-1.19037	5.1253	6.10102	-1.55418	1.09682
AL109627.1	1	16228674	16231336	-	57.3926	8.94386	6.23825	6.37696	0.615941	0.808708	0.916143	-0.126356	-1.09153	6.67394	7.28483	-1.46838	1.23244
AL109741.2	1	101256274	101256617	+	37.3435	5.272	4.09174	4.14928	0.949275	0.978073	0.964896	-0.0515552	-1.03638	3.9126	4.05494	-1.44761	1.34776
AL109918.1	6	52664366	52669156	+	26.291	4.22147	2.78891	2.92122	0.963318	0.985143	1.00891	0.0127917	1.00891	3.38766	3.35776	-1.48464	1.5112
AL117209.1	14	102933574	102937178	+	22.0996	3.02409	2.42894	2.45551	0.365662	0.619919	1.16364	0.218644	1.16364	2.50509	2.15281	-1.23137	1.66735
AL117332.1	20	21302731	21303705	-	20.7504	3.90931	2.11747	2.3056	0.391409	0.640357	1.19357	0.255285	1.19357	2.69978	2.26194	-1.60625	2.28828
AL118506.1	20	63861212	63864294	-	99.9973	13.6607	10.9051	11.1108	0.00908528	0.0736979	0.717414	-0.479123	-1.3939	9.20603	12.8322	-1.78277	-1.08985
AL118516.1	22	46761894	46762564	-	32.4669	5.33352	3.49229	3.60743	0.292403	0.548533	1.27955	0.355636	1.27955	4.35847	3.40625	-1.16494	1.9073
AL121594.1	14	35122549	35317475	+	199.168	30.3565	21.8527	22.1298	0.109728	0.3202	1.1635	0.218467	1.1635	25.4711	21.8919	-1.03289	1.39824
AL121603.2	14	34874343	34876460	+	31.9291	4.77913	3.47129	3.54768	0.637143	0.820326	0.925955	-0.110986	-1.07997	3.49798	3.7777	-1.59916	1.37111
AL121748.1	10	33211277	33213805	+	13.6693	2.32096	1.45346	1.51882	0.664917	0.83542	0.865191	-0.20891	-1.15581	1.48253	1.71353	-2.01961	1.51179
AL121753.2	20	35262727	35264188	-	21.0532	3.7012	2.19484	2.33925	0.408654	0.656313	0.836182	-0.258111	-1.19591	2.51676	3.00983	-1.85808	1.29917
AL121827.2	20	63253978	63261616	+	15.0046	3.61374	1.48992	1.66718	0.555429	0.771278	0.770105	-0.376872	-1.29852	1.64161	2.13167	-2.60716	1.54621
AL121832.2	20	62386303	62386971	-	17.9622	3.22167	1.88554	1.9958	0.634321	0.818716	1.08843	0.122249	1.08843	2.3479	2.15715	-1.55204	1.83868
AL121845.3	20	63708864	63739104	+	64.944	10.1364	7.04465	7.216	0.598309	0.797339	1.10107	0.138911	1.10107	7.49628	6.80815	-1.28907	1.56282
AL121871.1	X	92676519	92676955	-	11.991	2.35768	1.25497	1.33234	0.679902	0.844362	0.942656	-0.0851971	-1.06083	1.13716	1.20634	-1.96313	1.74444
AL121900.1	20	18567453	18744217	+	118.68	15.1538	13.1258	13.1867	0.026293	0.13995	1.20826	0.272936	1.20826	14.2023	11.7543	1.02597	1.42295
AL122020.1	14	90766531	90766990	+	10.4418	1.85851	1.10901	1.1602	0.245329	0.501336	1.44418	0.530255	1.44418	1.23025	0.851866	-1.20515	2.51354
AL122035.2	14	64440369	64442239	-	20.979	4.00298	2.23424	2.331	0.924192	0.967707	0.956919	-0.0635306	-1.04502	2.42337	2.53247	-1.72307	1.57781
AL132656.4	10	79681973	79684095	-	16.233	3.46364	1.701	1.80366	0.267348	0.525567	1.35355	0.436751	1.35355	2.35498	1.73985	-1.22872	2.25114
AL132780.2	14	22982698	22999079	+	10.3221	1.55534	1.11964	1.1469	0.302042	0.556228	0.774998	-0.367736	-1.29033	1.03435	1.33465	-2.20895	1.32674
AL133216.2	10	38403189	38452154	+	81.3223	13.1397	8.78781	9.03581	0.0408015	0.18136	1.30963	0.389165	1.30963	11.4	8.70469	1.02189	1.67841
AL133260.1	6	151099529	151099934	+	23.9574	3.8882	2.56788	2.66193	0.695384	0.852347	0.857001	-0.222632	-1.16686	2.40904	2.81101	-1.88772	1.38643
AL133268.1	6	25140003	25141404	+	22.8999	4.14841	2.457	2.54443	0.376751	0.627946	1.24647	0.317845	1.24647	3.0745	2.46657	-1.2406	1.9275
AL133352.1	10	100505628	100529882	-	33.8281	4.92809	3.6739	3.75868	0.884011	0.94873	0.971293	-0.042022	-1.02956	3.95147	4.06826	-1.49125	1.40686
AL133415.1	10	17233325	17234834	-	34.1253	4.76646	3.69702	3.7917	0.702551	0.855633	1.05653	0.0793401	1.05653	3.48088	3.29462	-1.34429	1.50058
AL133453.1	14	52640839	52641567	+	15.1163	2.86971	1.07439	1.67958	0.0815441	0.269546	0.602349	-0.731328	-1.66017	1.08059	1.79396	-9.6879	3.51501
AL135905.2	6	63572472	63583588	+	1851.53	255.322	203.896	205.726	8.45879e-06	0.000456838	1.26206	0.335777	1.26206	243.84	193.208	1.17132	1.35982
AL135925.1	10	79825902	79827603	+	71.6094	10.4545	7.88173	7.95661	0.0564003	0.218219	0.795769	-0.329579	-1.25665	7.1917	9.03743	-1.57971	1.00035
AL135978.1	14	67199062	67200328	+	56.8791	8.33175	6.24554	6.3199	0.688515	0.848747	0.928353	-0.107255	-1.07718	6.22601	6.70651	-1.44067	1.24163
AL135999.1	14	23561097	23568074	+	47.0444	7.43298	5.06345	5.22716	0.202362	0.453367	0.84186	-0.248347	-1.18785	4.20478	4.99463	-1.65754	1.17475
AL136295.1	14	24189157	24213474	-	55.3955	16.4896	4.98524	6.15506	0.811094	0.912805	0.810101	-0.303827	-1.23441	4.39825	5.42926	-2.94654	1.93371
AL136295.4	14	24180395	24190417	-	20.983	3.88834	1.90592	2.33145	0.118251	0.33365	1.51179	0.596259	1.51179	2.58046	1.70689	-1.84166	4.20914
AL136295.5	14	24147548	24166453	+	99.2277	15.1573	10.7421	11.0253	0.018721	0.113527	1.40206	0.487543	1.40206	12.2817	8.75976	1.05515	1.86302
AL136295.7	14	24201612	24202812	-	14.2171	2.07794	1.51814	1.57968	0.218261	0.470871	1.30527	0.384346	1.30527	1.87207	1.43424	-1.30727	2.22723
AL136962.1	13	22040972	22276527	+	18.1906	3.16064	1.96441	2.02118	0.188185	0.437455	1.30419	0.383155	1.30419	2.55732	1.96085	-1.13727	1.9344
AL137127.1	1	19072110	19075512	-	13.4147	1.98862	1.44998	1.49052	0.176008	0.419446	0.729749	-0.454528	-1.37033	1.27932	1.75309	-2.24321	1.19458
AL137191.1	14	63122888	63178191	-	29.3607	4.18468	3.23011	3.2623	0.388026	0.637084	1.1536	0.206138	1.1536	3.3959	2.94375	-1.20283	1.6007
AL138479.2	14	53954671	53962235	+	14.012	2.29578	1.50211	1.55689	0.453604	0.693833	1.18132	0.240402	1.18132	1.8868	1.59719	-1.36971	1.91145
AL138724.2	6	17706257	17707345	+	39.067	6.41506	4.21198	4.34078	0.815348	0.9146	0.957736	-0.0622993	-1.04413	4.36528	4.55791	-1.58259	1.45164
AL138725.1	6	18366736	18368645	-	12.2556	1.88861	1.31842	1.36173	0.904698	0.960593	1.03155	0.0448154	1.03155	1.51311	1.46683	-1.63349	1.73819
AL138752.2	9	37588413	38068688	-	335.292	48.9624	36.6569	37.2547	0.637609	0.82059	0.937982	-0.0923674	-1.06612	37.1908	39.6498	-1.37775	1.21216
AL138756.1	9	112028570	112039144	-	25.4539	4.06545	2.76713	2.82821	0.446164	0.687947	0.872766	-0.196333	-1.14578	2.93061	3.35784	-1.61272	1.22844
AL138885.3	6	10404502	10407929	+	16.0303	2.54231	1.73518	1.78114	0.203248	0.453888	1.30465	0.383663	1.30465	1.91624	1.46878	-1.21103	2.0613
AL139095.2	6	7338839	7339569	-	46.4388	6.13662	5.11577	5.15987	0.760828	0.888466	0.966788	-0.0487279	-1.03435	4.89279	5.06087	-1.37137	1.28179
AL139300.1	14	103562962	103685925	+	56.6907	11.1319	5.66859	6.29897	0.138078	0.364571	1.23246	0.301537	1.23246	6.86792	5.57254	-1.57051	2.38553
AL157384.1	9	95292338	95294811	+	10.9133	1.77752	1.13514	1.21259	0.293529	0.549293	0.7788	-0.360675	-1.28403	1.07365	1.37859	-2.55354	1.5488
AL157392.3	10	13631143	13668446	+	15.7536	2.09939	1.72885	1.7504	0.27468	0.531977	1.2259	0.293838	1.2259	2.0193	1.6472	-1.23208	1.8516
AL157400.5	10	89644603	89645224	-	31.0932	4.44048	3.37665	3.4548	0.862113	0.938289	0.985216	-0.0214881	-1.01501	3.75974	3.81616	-1.4449	1.40249
AL157777.1	6	86897118	86897422	+	15.2514	2.68182	1.59195	1.69459	0.499779	0.731511	0.840627	-0.250463	-1.18959	1.58046	1.8801	-2.22396	1.57157
AL157935.3	9	127867850	127906023	-	67.2364	10.6335	7.16009	7.47071	0.862231	0.938289	1.04135	0.0584488	1.04135	6.75748	6.48919	-1.4225	1.54256
AL158050.1	6	51410081	51410538	-	48.8932	7.5166	5.36385	5.43258	0.49898	0.731016	1.09055	0.125059	1.09055	5.26223	4.82529	-1.20939	1.43833
AL158206.1	9	19453209	19455174	+	13.6366	1.78311	1.43342	1.51518	0.226587	0.480954	0.787885	-0.343942	-1.26922	1.26925	1.61095	-2.36269	1.46667
AL158212.3	10	112823490	112827727	+	38.0896	5.22127	4.11998	4.23218	0.382093	0.631864	0.86579	-0.20791	-1.15501	4.3116	4.97996	-1.6392	1.22874
AL158801.6	14	55229217	55229682	+	25.9299	4.37575	2.74481	2.8811	0.109017	0.319555	1.33309	0.414771	1.33309	2.79105	2.09368	-1.13698	2.02056
AL160006.1	1	110058340	110062556	+	29.1178	3.8882	3.2067	3.23531	0.42092	0.666256	1.11758	0.160378	1.11758	3.5532	3.17937	-1.23489	1.54236
AL160254.1	13	67121081	67156625	+	10.7252	1.63987	1.10632	1.19168	0.468559	0.705732	1.21699	0.283318	1.21699	1.53455	1.26094	-1.48364	2.19736
AL160408.2	1	234607008	234609484	+	22.7448	4.42494	2.07974	2.5272	0.567155	0.778714	0.975374	-0.0359725	-1.02525	2.362	2.42164	-2.77312	2.63822
AL161431.1	13	109269634	109278513	+	141.141	20.2996	15.5465	15.6823	0.243125	0.499276	0.89187	-0.165094	-1.12124	14.2155	15.939	-1.37236	1.09162
AL161665.1	14	32149176	32158009	-	96.8182	14.3702	10.5194	10.7576	0.0293626	0.149054	1.35793	0.441411	1.35793	12.0744	8.89178	1.02437	1.80012
AL161772.1	13	20699307	20703719	-	14.2555	2.51582	1.52378	1.58395	0.896215	0.955058	0.918636	-0.122435	-1.08857	1.65284	1.79924	-1.8385	1.55149
AL161891.1	13	33846190	33850826	+	13.977	2.31495	1.48521	1.553	0.899997	0.957446	0.961198	-0.0570946	-1.04037	1.55274	1.61542	-1.85824	1.71683
AL161909.1	9	19200335	19201047	-	10.0561	1.51372	1.07203	1.11735	0.259569	0.517266	1.37906	0.463686	1.37906	1.20383	0.872936	-1.30017	2.47267
AL162231.1	9	34664163	34666113	-	23.1812	3.16178	2.54414	2.57569	0.597412	0.797218	1.10442	0.143294	1.10442	2.63328	2.38431	-1.3186	1.60836
AL162311.2	14	35881001	35881710	+	42.6146	7.01255	4.6391	4.73495	0.0977513	0.299935	1.34634	0.429047	1.34634	5.49786	4.08355	-1.02966	1.8664
AL162377.1	13	51803838	51813833	+	10.3718	1.65739	1.1127	1.15242	0.844722	0.929124	0.967347	-0.0478953	-1.03376	1.14779	1.18653	-1.86333	1.74363
AL162411.1	9	6645956	6670636	+	13.8025	2.06918	1.51145	1.53362	0.998126	0.999588	1.02661	0.0378876	1.02661	1.60835	1.56666	-1.54963	1.6332
AL162458.1	20	45926518	45935056	-	13.1023	2.56318	1.33765	1.45581	0.31415	0.569501	0.651573	-0.618001	-1.53475	1.16763	1.79202	-3.05857	1.29851
AL162581.1	6	52995620	52995951	+	12.5037	2.35672	1.27261	1.3893	0.0541399	0.213413	0.562286	-0.830623	-1.77845	0.929125	1.6524	-3.3772	1.06775
AL162595.1	1	229256892	229271243	-	91.139	12.2583	10.0614	10.1266	0.0181723	0.111057	0.79225	-0.335973	-1.26223	8.84632	11.1661	-1.519	-1.04886
AL163051.1	14	96500810	96502322	-	9.54246	1.55534	1.01287	1.06027	0.233336	0.488794	0.738397	-0.437532	-1.35429	0.985499	1.33465	-2.45959	1.34104
AL353705.4	9	78219120	78219358	+	22.815	4.26351	2.41865	2.53501	0.0337781	0.162185	1.65864	0.729998	1.65864	3.27489	1.97445	1.06226	2.58984
AL353748.3	9	88384902	88389225	-	10.1533	1.44556	1.05333	1.12814	0.709422	0.858943	0.901656	-0.149351	-1.10907	1.23699	1.37191	-2.08394	1.69421
AL353759.1	6	26160765	26172803	-	18.5023	2.95165	1.96585	2.05581	0.718345	0.864909	1.05315	0.0747068	1.05315	2.18686	2.0765	-1.64008	1.81905
AL354714.2	1	160894980	160896077	+	235.659	29.8877	26.0636	26.1843	0.657592	0.831328	0.968231	-0.046577	-1.03281	26.0615	26.9166	-1.22175	1.14535
AL354836.1	20	62305432	62306326	-	23.9838	4.11038	2.57766	2.66487	0.12351	0.341729	0.741902	-0.4307	-1.34789	2.49121	3.35787	-2.0101	1.1064
AL355001.2	13	19863858	19865049	+	15.7389	2.33296	1.69889	1.74876	0.869176	0.942313	0.970024	-0.043907	-1.0309	1.79148	1.84684	-1.69744	1.5972
AL355032.1	14	101677943	101678381	+	9.90537	1.93954	1.02117	1.1006	0.406512	0.654704	1.30578	0.384907	1.30578	1.02305	0.783483	-1.44534	2.46438
AL355472.1	1	234356704	234357142	-	9.44663	1.57367	1.00396	1.04963	0.927359	0.968552	1.02653	0.0377787	1.02653	0.930553	0.906502	-1.76573	1.86067
AL355987.4	9	136799223	136810043	+	15.8847	2.9105	1.64072	1.76497	0.143424	0.372903	0.73663	-0.440989	-1.35753	1.63188	2.21533	-2.4556	1.33247
AL356056.2	10	46580708	46598151	-	86.3392	14.1544	9.28977	9.59325	0.00692831	0.0614775	1.48545	0.570899	1.48545	10.571	7.1164	1.12156	1.9674
AL356488.3	1	109087971	109090859	-	19.5102	3.34325	2.03952	2.1678	0.20103	0.452169	0.761216	-0.393622	-1.31369	2.16671	2.84638	-2.12038	1.22866
AL356534.1	6	126304223	127213610	-	23.1183	4.22423	2.41683	2.5687	0.833315	0.923862	0.992443	-0.010944	-1.00761	3.0252	3.04824	-1.5536	1.53021
AL356585.2	13	18279320	18309935	-	12.5496	2.11413	1.32359	1.3944	0.0570926	0.220063	1.58668	0.66601	1.58668	1.88969	1.19097	-1.06217	2.67406
AL356652.1	20	35174355	35174920	-	18.6599	2.75203	2.03533	2.07333	0.299019	0.553588	1.2301	0.298777	1.2301	2.19241	1.7823	-1.23445	1.8679
AL356653.1	1	44122153	44122513	-	14.2259	2.22835	1.51711	1.58066	0.775165	0.896089	1.1804	0.239272	1.1804	1.62612	1.3776	-1.48569	2.07007
AL356968.2	1	48435967	48437224	+	67.2634	9.19359	7.38232	7.47371	0.771689	0.894842	0.958478	-0.0611823	-1.04332	7.8245	8.16346	-1.34216	1.23302
AL357141.1	6	116033901	116046754	+	9.99923	1.73839	1.08235	1.11103	0.953088	0.980245	0.994403	-0.00809732	-1.00563	0.963395	0.968818	-1.68356	1.66476
AL358113.1	9	69035747	69255188	+	15.01	3.40773	1.41283	1.66777	0.720983	0.865926	1.08435	0.116827	1.08435	1.5879	1.46439	-2.18284	2.5666
AL358115.1	1	165889725	165900996	-	14.1224	2.34749	1.48467	1.56916	0.760532	0.888466	0.939968	-0.0893169	-1.06387	1.57038	1.67067	-1.98251	1.75163
AL358334.2	14	50956259	50962003	-	10.2013	1.58094	1.0997	1.13347	0.538967	0.758555	1.14942	0.200905	1.14942	1.35587	1.17961	-1.4649	1.93538
AL358472.6	1	153975850	153986247	-	20.1603	4.19873	2.08957	2.24003	0.722474	0.867017	0.814712	-0.295638	-1.22743	2.12835	2.6124	-2.24566	1.49057
AL358942.1	6	112616703	112617881	-	263.801	34.2398	29.194	29.3112	0.0485538	0.199921	1.13082	0.177365	1.13082	29.8406	26.3885	1.00065	1.27792
AL359183.1	10	71364243	71366375	+	12.2577	2.34339	1.27921	1.36196	0.189984	0.4394	0.718641	-0.476658	-1.39152	1.33915	1.86345	-2.31157	1.1938
AL359263.1	X	93222220	93225016	-	55.3269	7.85977	6.06051	6.14743	0.61184	0.806542	0.938172	-0.092075	-1.0659	6.39145	6.81266	-1.40009	1.23231
AL359643.3	6	5003774	5045667	+	30.2385	4.09169	3.32279	3.35983	0.725812	0.86926	0.961155	-0.0571585	-1.04041	3.36798	3.50409	-1.46614	1.35445
AL359918.2	1	240142670	240145390	-	163.93	23.188	18.1125	18.2144	0.213269	0.46499	0.887465	-0.172238	-1.12681	16.9237	19.0698	-1.34628	1.06032
AL359922.1	9	21802636	22029595	+	18.6745	2.70364	2.05006	2.07494	0.865368	0.939935	1.04165	0.0588656	1.04165	2.27408	2.18316	-1.40685	1.52647
AL360181.3	10	133380017	133420272	+	17.2018	2.52375	1.83722	1.91131	0.894099	0.954069	0.914647	-0.128713	-1.09332	1.6212	1.77249	-1.79564	1.5022
AL365181.2	1	156637783	156641005	-	73.7102	9.94805	8.09762	8.19002	0.61986	0.81106	1.06214	0.0869753	1.06214	8.98949	8.46355	-1.20018	1.35398
AL365181.3	1	156641666	156644888	-	419.638	56.9886	46.3541	46.6265	0.0696922	0.245427	1.13265	0.179697	1.13265	51.6118	45.5674	-1.00936	1.29489
AL365203.2	10	32887255	32889312	-	113.641	16.9842	12.5017	12.6268	0.0213545	0.123452	0.794872	-0.331205	-1.25806	11.6937	14.7114	-1.51771	-1.04284
AL365205.1	6	41780349	41790142	+	89.7991	12.4852	9.89445	9.97768	0.739323	0.875824	1.02636	0.0375299	1.02636	10.4913	10.2219	-1.22719	1.29272
AL365217.1	6	65302522	65304958	+	19.2985	3.06333	2.10351	2.14428	0.416769	0.662459	0.863234	-0.212177	-1.15843	1.78215	2.0645	-1.70179	1.26813
AL365440.1	1	158523672	158525839	+	21.5003	3.11072	2.35714	2.38892	0.508752	0.737484	1.12899	0.175038	1.12899	2.47296	2.19041	-1.3079	1.66708
AL390039.1	X	107131659	107132270	+	68.6325	10.2203	7.55131	7.62584	0.626214	0.814209	0.933848	-0.0987403	-1.07084	7.57532	8.11194	-1.38932	1.21159
AL390728.4	1	247189851	247210857	-	25.6655	3.43306	2.81742	2.85173	0.464293	0.702701	0.887135	-0.172775	-1.12722	2.59475	2.92487	-1.61281	1.2693
AL390879.1	X	136909369	137022144	+	10.5577	1.67393	1.11101	1.17308	0.84179	0.927885	1.07586	0.105485	1.07586	1.31399	1.22134	-1.77049	2.04929
AL391056.1	9	129575117	129584557	+	14.5368	2.52965	1.5486	1.6152	0.682569	0.846056	0.877567	-0.188419	-1.13951	1.35016	1.53853	-1.91963	1.47835
AL391058.1	1	113449700	113450729	+	163.918	21.1858	18.1174	18.2131	0.118446	0.333953	1.13854	0.187183	1.13854	19.1925	16.8572	-1.0455	1.35525
AL391244.2	1	1409096	1410619	+	16.3208	2.76105	1.74722	1.81342	0.113788	0.326609	0.684657	-0.546548	-1.46059	1.45076	2.11896	-2.37255	1.11215
AL391416.1	6	83392416	83393410	+	195.983	23.9702	21.7133	21.7759	0.847919	0.931284	0.98125	-0.0273079	-1.01911	21.2701	21.6766	-1.18911	1.14494
AL391422.4	6	3751111	3753872	+	49.4164	6.58175	5.44429	5.49071	0.26254	0.52091	0.867325	-0.205356	-1.15297	5.30764	6.11956	-1.4952	1.12477
AL391650.1	1	26169516	26171832	-	28.4551	4.16261	3.08119	3.16168	0.224247	0.478612	1.25021	0.32217	1.25021	3.25769	2.60572	-1.17201	1.83189
AL391988.1	10	117267116	117268669	-	28.0888	4.55664	3.05972	3.12098	0.692076	0.850501	0.961848	-0.0561197	-1.03967	3.27888	3.40894	-1.50269	1.39021
AL392172.1	1	222815022	222837385	+	11.5407	1.76692	1.23314	1.2823	0.256712	0.513924	1.34922	0.432128	1.34922	1.5601	1.1563	-1.29815	2.36315
AL445423.3	1	220786990	220884504	+	51.7593	7.12863	5.6298	5.75104	0.125338	0.343971	0.789571	-0.34086	-1.26651	5.07205	6.42381	-1.76903	1.10285
AL445487.1	9	107169569	107171149	-	14.7562	2.09352	1.5836	1.63957	0.717685	0.86436	0.985825	-0.0205966	-1.01438	1.49871	1.52026	-1.71723	1.66889
AL445524.1	1	231520729	231528619	-	44.495	6.60244	4.88746	4.94389	0.251134	0.508051	1.18123	0.24029	1.18123	5.56316	4.70964	-1.1288	1.57501
AL450405.1	6	117998975	117999449	+	621.677	73.8253	69.0434	69.0752	0.840619	0.927603	0.990742	-0.0134192	-1.00934	68.9142	69.5582	-1.1025	1.08218
AL450998.1	1	15828232	15828670	+	216.462	25.6812	24.0234	24.0513	0.66216	0.833926	1.02568	0.0365792	1.02568	23.909	23.3104	-1.10418	1.16162
AL450998.2	1	15834474	15848148	-	16.9788	2.73305	1.81584	1.88653	0.6294	0.815673	1.1042	0.143005	1.1042	2.31346	2.09514	-1.34123	1.63531
AL451085.3	1	154961825	154962624	+	10.9154	2.08264	1.0873	1.21282	0.364724	0.619317	1.37472	0.459135	1.37472	1.59665	1.16144	-1.51597	2.86494
AL451165.2	6	34696317	34697471	+	10.3055	1.54814	1.10423	1.14505	0.798391	0.906417	0.905916	-0.142551	-1.10386	1.14303	1.26174	-1.9965	1.63849
AL512625.1	9	62897368	62900105	+	31.8997	4.58327	3.49506	3.54441	0.053567	0.211961	1.34891	0.431797	1.34891	4.25337	3.15319	-1.00327	1.82552
AL512844.1	1	105891739	105893518	+	23.0928	3.57624	2.52294	2.56586	0.716289	0.863536	0.906389	-0.141797	-1.10328	2.49957	2.75773	-1.64643	1.35261
AL513175.1	1	192246708	192247488	-	14.5067	2.4317	1.53448	1.61185	0.521768	0.746204	1.20542	0.269531	1.20542	1.91808	1.59122	-1.44159	2.09467
AL513477.1	1	2350414	2352821	-	16.4296	2.66623	1.76997	1.82552	0.01946	0.11629	0.59684	-0.744585	-1.67549	1.39264	2.33336	-2.54226	-1.10424
AL513497.1	1	28544460	28546543	+	22.3	3.0717	2.40746	2.47778	0.216798	0.469352	1.22666	0.294734	1.22666	3.03097	2.47092	-1.20568	1.81418
AL513550.1	6	99424922	99432324	+	9.79483	1.39496	1.06952	1.08831	0.480911	0.71549	1.18465	0.244464	1.18465	1.15867	0.978067	-1.4375	2.01738
AL583856.1	6	70608234	70609335	-	15.8844	2.71027	1.66682	1.76494	0.219202	0.472047	0.7848	-0.349603	-1.27421	1.72573	2.19895	-2.19469	1.35173
AL589182.1	14	19024090	19055552	+	26.4739	4.06545	2.79004	2.94155	0.947124	0.977303	0.983543	-0.0239398	-1.01673	3.41196	3.46905	-1.52963	1.47969
AL589182.2	14	19131842	19132891	-	15.3163	2.41696	1.63735	1.70181	0.0197276	0.117401	1.72337	0.785236	1.72337	2.19655	1.27456	1.09543	2.71128
AL589182.3	14	19072333	19075342	+	27.5763	4.60415	2.93584	3.06403	0.152834	0.385872	1.27361	0.348928	1.27361	3.99204	3.13442	-1.10051	1.78513
AL589743.1	14	19268853	19337731	-	770.284	89.0618	85.5298	85.5871	0.283194	0.540691	0.95736	-0.0628667	-1.04454	82.9568	86.6516	-1.13665	1.04179
AL590004.3	6	3904920	3911980	-	15.7187	2.89101	1.38918	1.74653	0.521198	0.745993	0.876637	-0.189948	-1.14072	2.21058	2.52166	-1.87179	1.43846
AL590399.1	9	62374128	62376837	-	26.8591	3.99408	2.79605	2.98435	0.505708	0.735386	1.16856	0.22473	1.16856	3.68416	3.15274	-1.41014	1.92559
AL590617.2	6	138692548	138697289	+	12.5428	2.32487	1.3238	1.39364	0.06615	0.239121	1.65166	0.723916	1.65166	1.826	1.10555	-1.04043	2.83827
AL590666.2	1	156646507	156661425	-	134.013	18.6283	14.6551	14.8904	0.928898	0.969137	1.01057	0.015171	1.01057	16.369	16.1978	-1.21897	1.24487
AL590714.1	1	161153760	161159350	-	13.2728	2.05677	1.43932	1.47476	0.799052	0.9068	0.99151	-0.0123008	-1.00856	1.44213	1.45447	-1.68685	1.65833
AL590867.2	6	153282287	153282734	-	3196.32	373.059	354.834	355.147	0.944364	0.976094	0.996865	-0.00453045	-1.00315	347.29	348.382	-1.08095	1.07418
AL591069.1	6	160369200	160386935	-	10.6547	2.07714	1.06114	1.18386	0.0655381	0.237903	1.71316	0.776663	1.71316	1.77137	1.03398	-1.10594	3.24585
AL591135.1	6	80064286	80070200	-	94.5756	12.6237	10.4461	10.5084	0.0429698	0.18644	1.19978	0.262772	1.19978	11.9512	9.96116	1.00482	1.43257
AL591684.2	10	47517816	47553515	-	9.63245	1.83329	1.01777	1.07027	0.774809	0.896089	1.11677	0.159331	1.11677	1.23359	1.10461	-1.67052	2.08343
AL591806.4	1	160997957	161038963	-	62.4795	11.152	6.69415	6.94217	0.33815	0.59349	0.834078	-0.261745	-1.19893	7.00433	8.39769	-1.69478	1.17904
AL592148.1	1	222641414	222641859	-	18.0728	2.71033	1.97369	2.00809	0.731241	0.872727	0.909944	-0.13615	-1.09897	1.83437	2.01591	-1.68557	1.39565
AL592293.2	9	15055057	15056053	+	24.4467	3.66358	2.65445	2.7163	0.230588	0.485651	1.23795	0.307951	1.23795	2.92403	2.36199	-1.21624	1.8639
AL596087.1	1	166275629	166277598	-	246.286	30.8403	27.281	27.3651	0.0556685	0.216965	1.1371	0.185359	1.1371	28.652	25.1974	-1.00114	1.29447
AL603766.1	6	149112009	149112673	-	10.1239	1.67168	1.09499	1.12488	0.436316	0.679692	0.811542	-0.301263	-1.23222	1.10053	1.35609	-2.08874	1.37565
AL606970.1	6	168298069	168302115	-	30.3323	5.01483	3.17416	3.37025	0.122528	0.340379	0.785737	-0.347882	-1.27269	3.56031	4.53117	-1.75957	1.08633
AL627309.5	1	141474	173863	-	16.085	2.32654	1.73649	1.78722	0.98624	0.993616	1.06452	0.090203	1.06452	1.81878	1.70855	-1.56249	1.77061
AL627402.1	X	41675760	41676495	-	210.053	24.8579	23.2976	23.3392	0.333992	0.58963	0.943488	-0.0839237	-1.0599	23.2348	24.6265	-1.2032	1.07105
AL645608.2	1	911435	914949	+	15.3922	2.44405	1.64344	1.71025	0.309897	0.564785	1.21911	0.285824	1.21911	2.08736	1.71221	-1.33322	1.98145
AL645608.7	1	995966	998052	-	36.3476	5.46601	3.91682	4.03862	0.00442884	0.0462613	1.63924	0.713031	1.63924	4.99088	3.04462	1.18266	2.27211
AL662795.2	6	30282349	30286055	-	25.8526	4.09169	2.83377	2.87252	0.773294	0.895576	1.08674	0.120012	1.08674	3.01458	2.77395	-1.33492	1.57655
AL662797.2	6	30723105	30723878	-	175.077	24.004	19.289	19.453	0.878785	0.946607	1.01623	0.0232329	1.01623	20.6846	20.3542	-1.18572	1.22453
AL662899.4	6	31666102	31673547	+	62.3495	8.33363	6.83228	6.92772	0.208439	0.459339	0.853366	-0.228764	-1.17183	6.43738	7.54351	-1.56302	1.13824
AL669830.2	6	30908242	30926460	+	22.7862	3.98266	2.25563	2.5318	0.0522638	0.209489	1.77846	0.830629	1.77846	2.70533	1.52116	-1.01537	3.21154
AL669831.1	1	725885	778627	-	115.686	16.2323	12.6025	12.854	0.899378	0.957054	0.991648	-0.0120994	-1.00842	14.259	14.3791	-1.24071	1.22007
AL671710.1	22	49902228	49904577	+	36.424	5.02898	4.00831	4.04711	0.226954	0.481461	0.838907	-0.253418	-1.19203	3.52996	4.20782	-1.59469	1.12228
AL671762.1	6	31828834	31839720	+	78.9261	13.0889	8.2543	8.76956	0.413875	0.660062	1.19877	0.261549	1.19877	10.1129	8.43614	-1.37907	1.98177
AL672207.1	X	101778969	101780539	-	10.447	2.25762	1.05072	1.16078	0.059074	0.224097	1.9285	0.947478	1.9285	1.65405	0.857688	-1.01084	3.75941
AL691432.2	1	1613758	1615796	-	15.5657	2.90765	1.65671	1.72952	0.307031	0.561899	1.31915	0.399611	1.31915	2.12417	1.61025	-1.27076	2.21132
AL691482.4	1	202011370	202015658	+	12.5374	2.31821	1.30177	1.39304	0.0274719	0.143357	1.79966	0.847724	1.79966	1.88561	1.04776	1.01845	3.18012
AL731569.1	10	86521945	86525102	+	10.4435	2.11078	1.11111	1.16039	0.439527	0.682815	0.774366	-0.368912	-1.29138	1.07816	1.39231	-2.32082	1.39166
AL731571.1	10	124996064	125001492	+	26.85	4.11884	2.92357	2.98334	0.75233	0.88416	1.06322	0.0884414	1.06322	3.32076	3.1233	-1.35995	1.53734
AL731577.2	10	124917143	124942882	+	13.2191	2.31562	1.36886	1.46879	0.328941	0.584928	1.2728	0.348007	1.2728	1.91476	1.50436	-1.37288	2.22411
AL732372.2	1	365389	522929	-	66.5563	8.14169	7.37525	7.39514	0.899562	0.957055	0.988725	-0.0163582	-1.0114	7.48063	7.56593	-1.25282	1.22473
AL732372.3	1	491225	493242	-	63.2166	9.01796	6.91284	7.02406	0.137696	0.364098	1.23418	0.303554	1.23418	8.01695	6.49577	-1.07338	1.63498
AL732414.1	1	231021611	231022184	+	34.0012	4.37066	3.73221	3.77791	0.20387	0.45443	0.835445	-0.259384	-1.19697	3.44255	4.12063	-1.65627	1.15602
AL845472.2	9	41269916	41273998	-	10.9892	1.88335	1.1364	1.22102	0.334462	0.590148	0.796031	-0.329103	-1.25623	1.20806	1.5176	-2.41928	1.53301
AL928654.1	14	105416884	105419740	-	47.5035	6.57496	5.1337	5.27816	0.463842	0.702314	0.892065	-0.164779	-1.12099	5.49738	6.16254	-1.55916	1.24075
AL928654.4	14	105370418	105372919	+	10.6463	1.80692	1.12913	1.18292	0.119424	0.335717	0.681942	-0.55228	-1.4664	0.992533	1.45545	-2.63129	1.22367
AL929602.1	14	19324708	19327717	-	14.5102	2.9496	1.01683	1.61224	0.818463	0.915927	1.24701	0.318475	1.24701	2.2342	1.79164	-4.07618	6.33861
ALAD	9	113386312	113401291	-	121.987	15.2672	13.472	13.5541	0.39814	0.646871	0.94163	-0.0867677	-1.06199	14.0952	14.969	-1.23191	1.09229
ALAS1	3	52198086	52214328	+	525.738	66.4703	58.2206	58.4153	0.0577253	0.221087	1.09677	0.133259	1.09677	63.7886	58.1605	-1.00319	1.20673
ALCAM	3	105366909	105576901	+	1183.67	156.833	129.72	131.519	0.271717	0.530077	0.945965	-0.0801416	-1.05712	141.122	149.184	-1.17711	1.05334
ALDH16A1	19	49453225	49471051	+	724.946	88.5939	80.4641	80.5496	0.0606653	0.227848	1.08656	0.119771	1.08656	83.6661	77.0007	-1.00341	1.18465
ALDH18A1	10	95605941	95656712	-	721.893	85.9187	80.1111	80.2104	0.250907	0.507882	0.949507	-0.0747493	-1.05318	79.3437	83.5631	-1.15526	1.04154
ALDH1A1	9	72900671	73080443	-	46743	5642.3	5184.8	5193.67	0.20613	0.456845	0.939755	-0.0896439	-1.06411	4958	5275.84	-1.17513	1.0378
ALDH1A3	15	100877714	100916627	+	133.801	19.6496	14.5113	14.8668	0.0970139	0.298565	0.860314	-0.217064	-1.16237	15.5248	18.0455	-1.39588	1.03315
ALDH1B1	9	38392702	38398662	+	1160.88	144.981	128.631	128.987	0.000475015	0.00996213	0.847566	-0.238602	-1.17985	119.377	140.847	-1.2769	-1.09017
ALDH1L2	12	105019784	105107644	-	230.57	30.3546	25.423	25.6189	0.000655912	0.0127164	0.764014	-0.388328	-1.30888	22.1531	28.9957	-1.4975	-1.14401
ALDH2	12	111766887	111817533	+	1342.71	166.17	148.689	149.19	0.182514	0.429061	1.08232	0.114128	1.08232	152.147	140.575	-1.03952	1.21771
ALDH3A1	17	19737984	19748944	-	11363.5	1479.82	1255.55	1262.61	0.602418	0.800365	1.03697	0.0523716	1.03697	1312.72	1265.92	-1.12131	1.20575
ALDH3A2	17	19648136	19685761	+	2264.29	307.894	249.652	251.588	0.000856553	0.0150615	1.19878	0.261567	1.19878	290.751	242.539	1.09227	1.31568
ALDH3B1	11	68008578	68029283	+	2472.94	314.825	272.851	274.772	0.515628	0.741567	1.04618	0.0651285	1.04618	290.072	277.268	-1.12244	1.2285
ALDH4A1	1	18871430	18902725	-	351.101	46.4352	38.7998	39.0112	0.038113	0.174379	0.870232	-0.200528	-1.14912	37.8378	43.4802	-1.30512	-1.01177
ALDH5A1	6	24494867	24537208	+	250.448	31.4837	27.6729	27.8275	0.882911	0.948258	1.00903	0.0129758	1.00903	29.5301	29.2657	-1.1399	1.16059
ALDH6A1	14	74056847	74084493	-	64.5239	9.83059	7.03057	7.16932	0.0759324	0.258739	1.26759	0.342087	1.26759	8.38661	6.61619	-1.05411	1.69372
ALDH7A1	5	126531200	126595363	-	406.216	49.8209	45.0524	45.1351	0.10521	0.312904	0.913059	-0.131219	-1.09522	43.0656	47.1663	-1.22299	1.01958
ALDH7A1P1	5	77290268	77291801	+	67.315	10.3464	7.38798	7.47944	0.0410349	0.181947	0.784639	-0.349899	-1.27447	6.95256	8.86084	-1.59931	-1.01561
ALDH9A1	1	165662216	165698864	-	335.338	43.7273	37.1125	37.2597	0.17137	0.4132	1.09162	0.126464	1.09162	40.1474	36.7779	-1.04489	1.24511
ALDOA	16	30064164	30072208	+	18711.8	2196.43	2077.43	2079.09	0.041356	0.182323	1.07855	0.109087	1.07855	2135.66	1980.13	1.00324	1.15951
ALDOC	17	28573115	28576949	-	25.9863	4.11038	2.76254	2.88736	0.246652	0.502895	0.735153	-0.443883	-1.36026	2.25817	3.0717	-2.16199	1.16844
ALG1	16	5033923	5087380	+	369.979	44.5003	40.9987	41.1088	0.87739	0.946504	0.991423	-0.0124269	-1.00865	40.0763	40.423	-1.14793	1.12832
ALG10	12	34022468	34029695	+	49.4632	8.19896	5.4002	5.49591	0.0204893	0.120093	1.40747	0.4931	1.40747	6.65157	4.72592	1.07269	1.84672
ALG10B	12	38316762	38329722	+	84.7785	12.4624	9.16618	9.41983	0.304809	0.559484	1.12571	0.170836	1.12571	11.3405	10.0741	-1.10945	1.40593
ALG11	13	52012398	52033601	+	304.285	41.3436	33.6034	33.8094	0.849866	0.932496	1.01411	0.0202116	1.01411	32.6867	32.232	-1.16033	1.1933
ALG12	22	49900229	49918439	-	266.307	35.2264	29.4721	29.5897	0.295859	0.550915	1.08119	0.112619	1.08119	31.5927	29.2203	-1.06873	1.24931
ALG13	X	111665811	111760650	+	181.189	21.9264	20.0909	20.1321	0.0856451	0.278214	1.12219	0.166322	1.12219	21.416	19.0841	-1.01924	1.28354
ALG14	1	94974405	95072952	-	55.9197	7.98032	6.10671	6.2133	0.722943	0.867348	1.05027	0.0707546	1.05027	7.05134	6.71387	-1.2184	1.34397
ALG1L15P	3	156044155	156044949	-	24.5741	3.29183	2.70492	2.73046	0.732912	0.873415	0.965201	-0.051099	-1.03605	2.76101	2.86055	-1.48125	1.37995
ALG2	9	99216425	99221943	-	264.135	33.8774	29.2251	29.3483	0.046741	0.19571	0.870531	-0.200033	-1.14872	26.6405	30.6026	-1.31452	-1.00384
ALG3	3	184242301	184249549	-	721.477	86.1792	80.0886	80.1641	0.909562	0.962348	0.995108	-0.00707536	-1.00492	78.5173	78.9033	-1.09898	1.08826
ALG5	13	36949738	37000262	-	115.771	15.3046	12.8101	12.8634	0.345847	0.601505	1.09287	0.128127	1.09287	13.4229	12.2822	-1.10324	1.31768
ALG6	1	63367575	63438554	+	55.0914	7.871	6.04836	6.12127	0.0442788	0.189882	1.29408	0.371922	1.29408	7.03416	5.43566	-1.00176	1.67758
ALG8	11	78100936	78139654	-	360.762	42.3108	40.0213	40.0846	0.0147951	0.0989829	1.13069	0.177208	1.13069	41.9685	37.1175	1.02807	1.24356
ALG9	11	111782195	111871582	-	175.27	24.1933	19.3408	19.4745	0.591981	0.793395	0.967245	-0.0480462	-1.03386	20.2368	20.9221	-1.22122	1.14253
ALKBH1	14	77672404	77708024	-	108.475	13.9782	12.0095	12.0528	0.496687	0.729311	0.942149	-0.0859733	-1.0614	11.4588	12.1624	-1.27749	1.13396
ALKBH2	12	109088188	109093632	-	212.693	26.4428	23.5782	23.6326	0.973109	0.989082	1.00234	0.00336743	1.00234	22.861	22.8077	-1.13754	1.14286
ALKBH3	11	43880811	43920275	+	114.82	15.4078	12.6805	12.7578	0.10191	0.307449	1.15459	0.207376	1.15459	14.2127	12.3097	-1.03676	1.38208
ALKBH4	7	102456238	102464864	-	131.876	15.921	14.6285	14.6529	0.579188	0.784914	0.961429	-0.056748	-1.04012	14.3438	14.9193	-1.2188	1.12659
ALKBH5	17	18183078	18209955	+	1795.45	211.629	199.381	199.494	0.301356	0.55589	1.03795	0.0537384	1.03795	201.073	193.722	-1.03748	1.11772
ALKBH6	19	36009120	36014240	-	154.01	20.2035	16.9552	17.1122	0.306227	0.56113	0.922522	-0.116345	-1.08399	17.5715	19.0473	-1.29	1.09785
ALKBH7	19	6372794	6375251	+	123.125	15.9358	13.5646	13.6806	0.13289	0.356575	0.872012	-0.19758	-1.14677	13.4029	15.3701	-1.38889	1.05612
ALKBH8	11	107502726	107565747	-	91.2671	12.5435	10.0394	10.1408	0.308722	0.563975	1.10771	0.14758	1.10771	11.4447	10.3319	-1.10369	1.35425
ALMS1	2	73385758	73625167	+	362.831	45.2703	40.0981	40.3145	0.0361701	0.169202	1.13779	0.186232	1.13779	40.8413	35.8954	1.00639	1.28634
ALOX12-AS1	17	6875232	7012531	-	11.0015	1.74919	1.15126	1.22239	0.649899	0.826902	1.15414	0.206814	1.15414	1.41215	1.22356	-1.65415	2.20338
ALOX12P2	17	6853861	6954108	+	13.1609	1.9997	1.39191	1.46232	0.53407	0.75546	0.850146	-0.234218	-1.17627	1.36297	1.60322	-2.14772	1.55226
ALOXE3	17	8095900	8119048	-	32.4517	7.02072	3.31332	3.60574	0.0118548	0.0864501	0.554646	-0.850361	-1.80295	2.94814	5.31536	-2.8312	-1.14815
ALPK2	18	58481247	58629092	-	435.1	56.9859	47.1885	48.3445	1.38897e-08	2.03157e-06	0.617145	-0.696318	-1.62036	34.3056	55.5875	-1.7768	-1.4777
ALS2	2	201700267	201780957	-	238.619	29.516	26.3843	26.5133	0.820612	0.917329	0.987671	-0.0178974	-1.01248	27.9514	28.3003	-1.14625	1.11816
ALS2CL	3	46668995	46693705	-	110.53	21.5013	11.321	12.2811	0.00101478	0.0169836	0.626096	-0.675545	-1.5972	11.4302	18.2564	-2.0437	-1.24825
ALX1	12	85280220	85301785	+	97.4896	12.8398	10.7501	10.8322	0.555171	0.771191	1.05219	0.073397	1.05219	11.9133	11.3224	-1.13879	1.26077
ALX4	11	44260440	44310140	-	30.2871	4.77691	3.25553	3.36524	0.0731259	0.253505	0.694627	-0.52569	-1.43962	2.60391	3.74865	-2.12478	1.02522
ALYREF	17	81887835	81891587	-	931.103	120.99	102.989	103.456	0.0179592	0.1102	1.16266	0.217425	1.16266	112.123	96.4368	1.03019	1.31216
AMACR	5	33986165	34008105	-	163.623	20.2837	18.1145	18.1803	0.554515	0.770873	1.04487	0.0633242	1.04487	18.9181	18.1057	-1.13122	1.23501
AMBP	9	114060127	114078329	-	28.6815	3.82851	3.15142	3.18683	0.915717	0.965094	1.02817	0.040072	1.02817	3.05207	2.96846	-1.36084	1.43857
AMBRA1	11	46396414	46594126	-	385.765	45.5857	42.8267	42.8627	0.917613	0.96617	1.00526	0.00757085	1.00526	43.8157	43.5864	-1.09831	1.1099
AMD1	6	110874770	110898880	+	883.28	102.627	98.0254	98.1422	0.560264	0.773918	0.975472	-0.0358274	-1.02514	98.7083	101.19	-1.12236	1.06798
AMDHD1	12	95943331	95968721	+	36.0651	5.57954	3.9253	4.00724	0.466902	0.70445	1.14584	0.196407	1.14584	4.62256	4.03421	-1.2241	1.60718
AMDHD2	16	2520357	2531423	+	185.352	25.0518	20.4867	20.5946	0.243499	0.499729	1.09546	0.131534	1.09546	22.4844	20.5251	-1.06503	1.27806
AMER1	X	64185117	64205709	-	177.096	26.4295	19.1435	19.6773	0.0297537	0.150281	1.1817	0.240861	1.1817	17.9505	15.1904	1.01439	1.3766
AMFR	16	56361452	56425546	-	1270.31	158.635	140.685	141.146	0.0139668	0.0954339	0.874886	-0.192832	-1.14301	133.28	152.34	-1.26818	-1.03018
AMH	19	2249309	2252074	+	124.472	19.3584	13.6734	13.8302	0.200094	0.451241	1.16725	0.223111	1.16725	15.5785	13.3464	-1.06615	1.45259
AMIGO1	1	109504178	109509739	-	21.1239	3.23181	2.29798	2.3471	0.967798	0.986458	0.958651	-0.0609229	-1.04313	2.33809	2.43893	-1.61398	1.48326
AMIGO2	12	47075707	47079952	-	2311.72	335.16	243.838	256.858	0.000730836	0.0136105	0.867003	-0.205892	-1.1534	286.828	330.827	-1.23917	-1.07357
AMIGO3	3	49716829	49719685	-	20.4731	5.28156	1.61017	2.27478	0.0092028	0.0743992	0.340793	-1.55303	-2.93434	1.34526	3.94746	-9.33315	1.08395
AMMECR1	X	110194186	110440234	-	307.817	38.4982	34.1181	34.2019	0.111576	0.3229	1.09735	0.13402	1.09735	36.6628	33.4104	-1.02478	1.23402
AMMECR1L	2	127861630	127885957	-	329.003	40.1116	36.4535	36.5559	0.611753	0.806518	1.02643	0.0376393	1.02643	38.4659	37.4753	-1.09485	1.1535
AMN	14	102922663	102933597	+	12.9789	2.25224	1.37587	1.4421	0.359659	0.614956	0.833296	-0.263099	-1.20005	1.4332	1.71992	-2.09299	1.45334
AMN1	12	31671142	31729122	-	38.8499	6.37347	4.22283	4.31665	0.0169522	0.106116	1.47657	0.562246	1.47657	5.33212	3.61116	1.08904	2.00199
AMOTL1	11	94706431	94876749	+	665.402	88.0825	72.2063	73.9336	0.11807	0.333436	0.936826	-0.0941476	-1.06743	81.7072	87.2171	-1.16158	1.01945
AMOTL2	3	134355874	134375480	-	1520.89	197.024	168.413	168.987	0.0576059	0.221043	0.901477	-0.149637	-1.10929	164.01	181.934	-1.2351	1.00372
AMPD2	1	109616104	109632054	+	566.222	72.895	62.6552	62.9135	0.152811	0.385872	0.929652	-0.105237	-1.07567	63.6849	68.504	-1.19038	1.02879
AMZ2	17	68247930	68257165	+	542.852	67.9776	60.1765	60.3169	0.041311	0.18232	0.899244	-0.153215	-1.11205	58.3545	64.8929	-1.22928	-1.00599
AMZ2P1	17	64966550	64975577	-	26.7017	3.61374	2.94388	2.96686	0.934736	0.971413	0.976262	-0.03466	-1.02432	2.91435	2.98521	-1.44152	1.37389
ANAPC1	2	111611639	111884691	-	1111.67	135.301	123.38	123.519	0.207049	0.45775	1.05651	0.0793044	1.05651	125.982	119.244	-1.03419	1.15437
ANAPC10	4	144831908	145098542	-	26.6949	4.09171	2.92647	2.9661	0.669401	0.837916	1.111	0.151859	1.111	3.03521	2.73196	-1.29294	1.5959
ANAPC11	17	81890790	81900992	+	601.278	78.1249	66.5237	66.8086	0.0055238	0.0531099	1.1494	0.200881	1.1494	74.6859	64.9782	1.04938	1.25896
ANAPC13	3	134477706	134486717	-	252.991	30.672	28.054	28.1102	0.302262	0.55649	1.06549	0.091513	1.06549	29.0761	27.289	-1.07038	1.21517
ANAPC15	11	72106378	72112781	-	261.132	31.3219	28.9778	29.0147	0.582167	0.786613	1.032	0.045449	1.032	30.0054	29.0749	-1.09075	1.16168
ANAPC16	10	72216000	72235861	+	543.207	66.9533	60.0988	60.3563	0.280159	0.538574	1.05591	0.0784827	1.05591	65.245	61.7905	-1.05192	1.17283
ANAPC1P1	2	86861825	86912979	+	15.8316	2.17706	1.74134	1.75907	0.366607	0.62107	1.18368	0.24328	1.18368	1.92217	1.62389	-1.2818	1.79593
ANAPC2	9	137174784	137188561	-	367.199	46.8157	40.7354	40.7999	0.309005	0.564175	1.05627	0.0789791	1.05627	42.8559	40.5729	-1.05359	1.1755
ANAPC4	4	25377213	25418499	+	86.3185	11.3668	9.53973	9.59095	0.974423	0.989717	0.991049	-0.0129723	-1.00903	9.75559	9.84371	-1.25384	1.2315
ANAPC5	12	121308245	121399897	-	1060.93	129.681	117.762	117.881	0.16413	0.402577	1.05978	0.0837585	1.05978	122.971	116.035	-1.02529	1.15153
ANAPC7	12	110372900	110403731	-	544.439	68.5444	60.339	60.4932	0.237918	0.49406	1.05772	0.0809576	1.05772	64.6025	61.0771	-1.04143	1.16512
ANG	14	20684177	20698972	+	59.9908	9.29114	6.27536	6.66564	0.0412517	0.182289	1.45172	0.537759	1.45172	8.8881	6.12248	-1.03837	2.18835
ANGEL1	14	76786009	76826247	-	235.344	29.9694	26.0385	26.1493	0.224966	0.479291	0.920347	-0.11975	-1.08655	25.9334	28.1779	-1.25588	1.06378
ANGEL2	1	212992182	213015868	-	189.809	23.6197	20.9623	21.0899	0.491899	0.725213	1.04502	0.0635274	1.04502	23.006	22.0149	-1.0959	1.19679
ANGPT1	8	107249482	107498056	-	10.6001	1.78076	1.12112	1.17779	0.21728	0.469673	1.40864	0.494299	1.40864	1.28333	0.911041	-1.28912	2.55795
ANGPTL4	19	8363289	8374371	+	281.387	45.532	30.6461	31.2653	0.115271	0.328763	1.13378	0.181137	1.13378	29.2161	25.7688	-1.04514	1.34347
ANK1	8	41653220	41896763	-	85.6798	15.2672	9.02957	9.51997	4.63215e-05	0.00176046	0.531588	-0.91162	-1.88116	7.33431	13.797	-2.38544	-1.48348
ANK2	4	112818032	113384222	+	212.982	40.6211	21.477	23.6646	0.000184065	0.00487875	0.732662	-0.448781	-1.36489	13.7626	18.7844	-1.56071	-1.19363
ANK3	10	60026298	60733491	-	32.2393	5.24737	3.38861	3.58215	0.457619	0.696494	1.14947	0.200972	1.14947	4.39692	3.82516	-1.34784	1.78088
ANKDD1A	15	64911902	64958692	+	16.6247	2.34031	1.78249	1.84719	0.194893	0.445267	0.782525	-0.353792	-1.27792	1.68709	2.15596	-2.13203	1.30554
ANKEF1	20	9986126	10058304	+	303.351	39.1492	33.6047	33.7057	0.887375	0.950414	1.01322	0.0189405	1.01322	34.6178	34.1663	-1.13344	1.16359
ANKFY1	17	4163821	4263996	-	1267.6	182.039	138.534	140.845	0.000328044	0.00747281	1.19055	0.251623	1.19055	134.709	113.149	1.09916	1.28953
ANKH	5	14704800	14871779	-	290.215	36.1844	32.1834	32.2461	0.681315	0.845522	1.02567	0.036573	1.02567	32.8064	31.9852	-1.11058	1.16834
ANKHD1	5	140401814	140539857	+	708.473	87.6821	78.5324	78.7193	0.669432	0.837916	0.979048	-0.0305481	-1.0214	77.5003	79.1588	-1.15123	1.10349
ANKHD1-EIF4EBP3	5	140401908	140549570	+	310.044	52.3307	33.4623	34.4493	0.0544899	0.213939	1.34039	0.422651	1.34039	41.5397	30.9908	1.00562	1.78661
ANKIB1	7	92245974	92401384	+	599.936	72.2577	66.5997	66.6596	0.889065	0.951453	1.00831	0.0119442	1.00831	67.7002	67.142	-1.09107	1.10929
ANKLE2	12	132725503	132761833	-	978.434	120.063	108.564	108.715	0.130812	0.352963	0.937886	-0.0925148	-1.06623	107.448	114.564	-1.16084	1.02111
ANKMY1	2	240479422	240569210	-	136.341	16.8251	15.0894	15.149	0.0458507	0.193676	1.17453	0.232083	1.17453	16.3011	13.8788	1.0012	1.37787
ANKMY2	7	16599779	16645818	-	99.9654	13.1361	11.0114	11.1073	0.13533	0.360762	1.16509	0.220439	1.16509	12.4515	10.6872	-1.05826	1.43651
ANKRA2	5	73552190	73565668	-	59.889	8.19933	6.6063	6.65433	0.77851	0.897743	1.03591	0.0508951	1.03591	6.66684	6.43575	-1.25036	1.34177
ANKRD1	10	90912096	90921277	-	57.2622	10.57	5.98922	6.36247	0.0078224	0.0663381	0.604943	-0.725129	-1.65305	5.43029	8.97654	-2.34269	-1.16642
ANKRD10	13	110878540	110915070	-	177.995	22.2227	19.6433	19.7772	0.285968	0.543342	1.10923	0.149559	1.10923	20.0688	18.0926	-1.08113	1.33021
ANKRD11	16	89267630	89490562	-	3404.61	408.888	377.15	378.29	0.795591	0.905088	0.991839	-0.011822	-1.00823	396.463	399.725	-1.07788	1.06036
ANKRD12	18	9136228	9285986	+	184.851	26.781	20.3196	20.539	0.0717447	0.249681	1.19507	0.257093	1.19507	23.32	19.5136	-1.01638	1.45158
ANKRD13A	12	109999186	110039764	+	126.602	17.8491	13.9529	14.0669	0.0550311	0.215356	0.823284	-0.280537	-1.21465	12.8835	15.6489	-1.47699	1.0011
ANKRD13B	17	29589769	29614762	+	296.295	39.4639	32.6701	32.9217	0.171937	0.413821	1.08986	0.124138	1.08986	36.7505	33.7205	-1.0444	1.24052
ANKRD13C	1	70258999	70354735	-	186.052	23.2177	20.5837	20.6725	0.871789	0.943601	1.00974	0.0139831	1.00974	21.6697	21.4607	-1.15385	1.17644
ANKRD13D	11	67289300	67302486	+	204.003	25.3619	22.6065	22.667	0.649439	0.826893	1.0333	0.0472551	1.0333	23.4652	22.7091	-1.12156	1.19749
ANKRD16	10	5861616	5889907	-	131.643	16.7733	14.5783	14.627	0.765505	0.890825	0.976773	-0.0339053	-1.02378	15.0795	15.4381	-1.19779	1.14279
ANKRD17	4	73073376	73258799	-	1036.75	134.898	114.809	115.195	0.0144597	0.097531	1.14714	0.198037	1.14714	124.83	108.818	1.03369	1.27304
ANKRD18A	9	38571358	38620597	-	36.8506	5.39203	4.02908	4.09451	0.85572	0.935651	0.942224	-0.0858585	-1.06132	4.1658	4.42124	-1.49621	1.32831
ANKRD18B	9	33524394	33573010	+	59.7613	8.999	6.42165	6.64014	0.294226	0.549798	1.17447	0.232016	1.17447	8.06661	6.86827	-1.16084	1.60126
ANKRD18EP	6	39110321	39112953	+	20.2199	3.06879	2.20521	2.24666	0.438488	0.681892	1.15198	0.204116	1.15198	2.62183	2.27594	-1.27211	1.68816
ANKRD19P	9	92809568	92838458	+	31.0534	4.33247	3.39734	3.45038	0.142437	0.371201	0.809671	-0.304593	-1.23507	3.34924	4.13655	-1.67179	1.09597
ANKRD2	10	97572499	97583885	+	52.0026	8.35798	5.40191	5.77807	0.333761	0.589494	0.884971	-0.176299	-1.12998	6.50217	7.34733	-1.60164	1.25436
ANKRD20A5P	18	14179097	14252141	+	22.8145	3.07471	2.50974	2.53495	0.79895	0.906756	0.954298	-0.0674886	-1.04789	2.30104	2.41124	-1.48303	1.35057
ANKRD23	2	96824526	96857935	-	21.04	3.22765	2.25713	2.33778	0.909226	0.96221	1.02274	0.0324451	1.02274	2.38642	2.33335	-1.61946	1.69396
ANKRD26	10	26991914	27100499	-	116.136	14.545	12.8483	12.904	0.515763	0.741658	0.946401	-0.0794764	-1.05663	12.4863	13.1935	-1.28176	1.14804
ANKRD27	19	32597006	32676598	-	447.492	51.7685	49.6917	49.7213	0.465975	0.703689	1.0321	0.0455798	1.0321	49.5578	48.0166	-1.05954	1.12865
ANKRD28	3	15667236	15859772	-	404.502	49.3026	44.744	44.9447	0.933994	0.970995	1.00482	0.00693092	1.00482	47.741	47.5122	-1.1037	1.11435
ANKRD29	18	23598926	23662912	-	20.4061	3.16204	2.23339	2.26734	0.772624	0.89514	0.920562	-0.119414	-1.08629	2.23321	2.42592	-1.63364	1.3844
ANKRD30A	10	37125725	37384112	+	49.3364	6.99869	5.31439	5.48183	0.674052	0.84084	1.05448	0.0765283	1.05448	6.45823	6.12458	-1.24098	1.37988
ANKRD33B	5	10564070	10657817	+	685.063	96.4719	75.3402	76.1181	0.665637	0.835782	0.954985	-0.0664506	-1.04714	70.2214	73.5315	-1.25441	1.14401
ANKRD36	2	97113153	97264522	+	57.6458	7.49613	6.36139	6.40509	0.864149	0.93906	1.01075	0.0154215	1.01075	6.63036	6.55986	-1.27667	1.30426
ANKRD36B	2	97492663	97589966	-	25.9886	3.63167	2.83047	2.88762	0.32792	0.584044	1.19854	0.261274	1.19854	3.10008	2.58655	-1.23995	1.78118
ANKRD36C	2	95836919	95991832	-	21.9112	3.54813	2.34305	2.43458	0.388452	0.637472	0.845148	-0.242724	-1.18323	2.30015	2.7216	-1.92441	1.37456
ANKRD37	4	185396021	185400629	+	11.3515	1.69612	1.22476	1.26128	0.81363	0.91353	1.06124	0.0857528	1.06124	1.13414	1.06869	-1.55876	1.75552
ANKRD39	2	96836611	96858017	-	139.59	18.724	15.2874	15.51	0.479096	0.713973	0.938311	-0.0918612	-1.06574	16.441	17.5219	-1.28618	1.13239
ANKRD40	17	50693198	50707915	-	714.541	87.6063	79.2647	79.3935	0.194738	0.445214	1.06015	0.0842705	1.06015	83.716	78.966	-1.03396	1.16209
ANKRD42	11	83193712	83260695	+	111.791	14.7257	12.3774	12.4213	0.149734	0.381804	0.881315	-0.18227	-1.13467	11.5493	13.1046	-1.35208	1.05019
ANKRD44	2	196967017	197311174	-	25.5776	3.29431	2.80476	2.84195	0.368154	0.622579	1.15107	0.202978	1.15107	2.8434	2.47022	-1.22714	1.62592
ANKRD46	8	100509752	100559785	-	79.1425	10.6238	8.70158	8.79361	0.0776689	0.262314	0.816676	-0.292165	-1.22448	8.02242	9.82326	-1.55883	1.03968
ANKRD49	11	94493979	94499579	+	39.9097	5.82735	4.34265	4.43441	0.739861	0.875841	1.05582	0.0783585	1.05582	4.87327	4.61565	-1.33887	1.49251
ANKRD50	4	124664048	124712733	-	209.809	33.4263	22.7464	23.3122	0.000862107	0.0151176	0.756297	-0.402975	-1.32223	22.507	29.7595	-1.52369	-1.14741
ANKRD52	12	56237807	56258385	-	2610.14	330.648	288.78	290.016	0.0224541	0.127249	0.913402	-0.130678	-1.09481	291.965	319.646	-1.18162	-1.01437
ANKRD54	22	37830855	37849328	-	247.731	30.9884	27.4124	27.5257	0.107701	0.317122	0.913529	-0.130478	-1.09466	27.7074	30.3301	-1.22534	1.02259
ANKRD6	6	89433152	89633835	+	36.945	5.51691	3.95085	4.105	0.579709	0.785267	0.939943	-0.0893541	-1.06389	3.68684	3.92241	-1.6489	1.45679
ANKRD9	14	102501767	102509800	-	455.539	58.6438	50.1545	50.6154	0.0883373	0.282844	1.09124	0.125963	1.09124	57.2775	52.4887	-1.0166	1.21056
ANKS1A	6	34889255	35091407	+	240.435	30.966	26.547	26.715	0.759209	0.887764	1.02982	0.0423988	1.02982	28.4264	27.6032	-1.14094	1.21001
ANKS3	16	4696510	4734379	-	311.703	38.8155	34.4852	34.6336	0.735753	0.874124	0.978214	-0.0317773	-1.02227	35.3839	36.172	-1.18311	1.13212
ANKS4B	16	21233699	21253851	+	132.593	25.8515	12.7241	14.7326	0.214305	0.466259	1.24569	0.316947	1.24569	21.0704	16.9146	-1.1303	1.75394
ANKS6	9	98731329	98796966	-	353.127	43.7057	39.1287	39.2363	0.439652	0.682815	1.04113	0.0581444	1.04113	41.6858	40.0392	-1.07067	1.16054
ANKZF1	2	219229783	219236680	+	179.487	23.7872	19.7964	19.943	0.328007	0.584126	0.932467	-0.100875	-1.07242	17.8987	19.195	-1.24904	1.08604
ANLN	7	36389821	36453792	+	1300.13	166.639	143.396	144.459	0.298193	0.552973	1.04261	0.0602057	1.04261	159.094	152.591	-1.04267	1.13342
ANO10	3	43354859	43691595	-	207.997	27.2831	22.9492	23.1107	0.00261039	0.0325246	0.784863	-0.349487	-1.27411	20.4693	26.0801	-1.47182	-1.10295
ANO5	11	21799934	22283358	+	98.028	13.7627	10.7488	10.892	0.266772	0.52499	1.1364	0.184475	1.1364	12.0387	10.5937	-1.13549	1.46638
ANO6	12	45215987	45440405	+	1465.93	216.23	159.928	162.881	0.0072402	0.0632681	0.818574	-0.288815	-1.22164	130.794	159.783	-1.40456	-1.06254
ANO7	2	241188509	241225378	+	28.3546	3.71973	3.10503	3.15051	0.659101	0.831969	1.06571	0.0918125	1.06571	3.52891	3.31133	-1.30281	1.47965
ANO8	19	17323223	17334856	-	111.524	16.2885	12.2513	12.3916	0.681461	0.845631	1.05713	0.0801573	1.05713	13.4913	12.7621	-1.18354	1.32264
ANP32A	15	68778535	68820898	-	1959.01	244.008	217.144	217.668	0.000163275	0.00446783	1.17505	0.232721	1.17505	237.428	202.058	1.09714	1.25849
ANP32B	9	97983341	98015944	+	1928.73	237.321	213.869	214.303	0.00620561	0.0572767	1.12907	0.175129	1.12907	229.751	203.487	1.0404	1.22528
ANP32BP1	15	75321397	75322694	-	28.7468	4.05098	3.14496	3.19409	0.574507	0.782832	1.09001	0.124346	1.09001	2.99785	2.75029	-1.26407	1.50188
ANP32C	4	164197007	164197712	-	12.1975	1.9529	1.30312	1.35528	0.0979647	0.300461	1.5257	0.609467	1.5257	1.55625	1.02003	-1.106	2.57449
ANP32E	1	150218417	150236157	-	775.122	112.239	85.2444	86.1247	0.00105244	0.0174992	1.28991	0.367272	1.28991	100.673	78.0467	1.12698	1.4764
ANPEP	15	89784895	89815402	-	17.7449	3.6076	1.78194	1.97166	0.06345	0.233777	1.58241	0.662124	1.58241	2.94786	1.86289	-1.02144	2.5577
ANTKMT	16	720581	722591	+	485.677	59.2853	53.8567	53.9641	0.588084	0.790952	0.970867	-0.0426539	-1.03001	54.3856	56.0176	-1.15043	1.08438
ANTXR1	2	69013178	69249328	+	494.058	84.8047	53.3607	54.8953	0.00914181	0.0740311	0.704721	-0.504877	-1.419	47.901	67.9717	-1.822	-1.10514
ANTXR2	4	79901146	80125455	-	12.7004	2.34031	1.32542	1.41116	0.00691938	0.0614362	0.491598	-1.02445	-2.03418	0.992467	2.01886	-3.3544	-1.23357
ANXA1	9	73151865	73170394	+	6759.32	855.215	747.643	751.035	0.0307392	0.153547	1.08313	0.11521	1.08313	827.244	763.751	1.00851	1.16327
ANXA11	10	80150889	80205573	-	2526.94	310.051	280.293	280.771	0.237282	0.493383	0.954299	-0.0674864	-1.04789	282.025	295.531	-1.13617	1.03469
ANXA13	8	123680794	123737403	-	176.846	24.9343	19.0641	19.6496	0.123177	0.341417	0.842144	-0.247862	-1.18745	20.1177	23.8887	-1.51988	1.0779
ANXA2	15	60347134	60402884	-	12139.5	1506.46	1346.41	1348.83	0.00138288	0.0207808	0.878668	-0.18661	-1.13809	1278.78	1455.36	-1.22081	-1.06097
ANXA2P2	9	33624274	33625294	+	6799.66	826.735	754.056	755.518	0.00312029	0.0365629	0.881074	-0.182664	-1.13498	712.143	808.267	-1.2261	-1.05063
ANXA2P3	10	64825572	64826580	+	30.2436	4.33256	3.28342	3.3604	0.090352	0.286327	0.740212	-0.433989	-1.35096	3.03449	4.09948	-1.92537	1.05494
ANXA3	4	78551747	78610452	+	682.286	87.1792	75.5957	75.8096	0.0401639	0.179679	0.897408	-0.156165	-1.11432	73.442	81.8379	-1.23465	-1.00572
ANXA4	2	69644425	69827113	+	3716.7	483.459	407.979	412.966	0.85058	0.932923	0.981997	-0.0262095	-1.01833	434.582	442.549	-1.22781	1.184
ANXA5	4	121667946	121696996	-	1520.41	196.221	168.507	168.934	0.0154385	0.101089	0.886002	-0.174619	-1.12867	160.373	181.007	-1.24003	-1.0273
ANXA6	5	151100706	151157786	-	306.804	39.1033	33.9699	34.0893	0.0111313	0.0835053	0.851087	-0.232621	-1.17497	31.7251	37.276	-1.32251	-1.04389
ANXA7	10	73375101	73414077	-	888.723	114.853	98.104	98.7471	0.940519	0.974082	1.00434	0.00625266	1.00434	91.6167	91.2205	-1.09955	1.10912
ANXA8	10	47460162	47484159	-	178.579	27.8299	18.9887	19.8422	2.69557e-07	2.68921e-05	0.496429	-1.01034	-2.01439	12.9067	25.9991	-2.38482	-1.70149
ANXA8L1	10	46375627	46391785	+	316.596	44.0447	34.3838	35.1774	1.83932e-06	0.000129388	0.621406	-0.686392	-1.60925	25.7656	41.4633	-1.83861	-1.40851
ANXA9	1	150982249	150995635	+	29.4559	4.60749	3.11147	3.27288	0.249619	0.506022	0.817211	-0.29122	-1.22367	3.43718	4.20599	-1.77585	1.18597
AOC2	17	42844580	42850708	+	19.9929	2.87855	2.17639	2.22144	0.659248	0.831969	1.11188	0.152996	1.11188	2.16199	1.94445	-1.35652	1.67703
AOPEP	9	94726701	95087219	+	469.064	57.0641	52.0482	52.1183	0.285305	0.54273	1.05215	0.0733434	1.05215	54.7386	52.0254	-1.04598	1.15793
AOX1	2	200586014	200677065	+	39.5235	8.6923	3.69977	4.3915	1.48376e-07	1.57894e-05	0.238776	-2.06627	-4.18802	1.79759	7.52837	-5.80624	-3.02081
AP000356.3	22	24644791	24653357	+	11.6137	2.34089	1.10397	1.29041	0.363871	0.618624	0.768305	-0.380249	-1.30157	0.77271	1.00573	-2.56988	1.51698
AP000487.1	11	70372246	70398489	-	10.4245	1.67415	1.13589	1.15828	0.408206	0.655741	0.798273	-0.325045	-1.2527	1.03812	1.30046	-2.11107	1.34526
AP000533.2	22	15562017	15564277	-	12.6039	2.22569	1.34026	1.40044	0.844381	0.928965	1.01418	0.0203104	1.01418	1.50627	1.48521	-1.76356	1.81392
AP000547.3	22	16601911	16615112	+	34.0429	5.01324	3.68713	3.78254	0.71713	0.864213	0.950635	-0.0730367	-1.05193	3.94254	4.14727	-1.53531	1.38747
AP000648.4	11	90193614	90198121	+	44.3151	7.49841	4.71181	4.9239	0.524093	0.747455	0.898401	-0.154569	-1.11309	5.14519	5.72705	-1.69835	1.37078
AP000769.1	11	65455258	65466721	+	29.1876	4.60749	3.08334	3.24307	0.826569	0.919648	0.933861	-0.0987208	-1.07082	3.40877	3.6502	-1.74798	1.52441
AP000866.1	11	124800424	124834488	+	10.8876	2.07714	1.07829	1.20974	0.0690803	0.244589	1.69288	0.759476	1.69288	1.6758	0.989916	-1.22007	3.49652
AP000873.2	11	83184491	83193795	-	10.4628	1.4816	1.13604	1.16253	0.739947	0.875841	1.06734	0.0940265	1.06734	1.23029	1.15266	-1.6192	1.84463
AP000944.5	11	65261928	65326544	+	152.448	21.5175	16.6032	16.9387	0.164055	0.402544	0.830155	-0.268547	-1.20459	15.0688	18.1518	-1.59889	1.10189
AP001000.1	11	127940913	127941655	-	122.028	15.059	13.4876	13.5586	0.421974	0.666969	1.06865	0.0957901	1.06865	13.9142	13.0204	-1.14167	1.3038
AP001062.1	21	44331234	44335852	+	29.2375	4.49378	3.16737	3.24861	0.732807	0.873415	1.07175	0.099962	1.07175	3.53872	3.30183	-1.39803	1.60583
AP001107.9	11	66347950	66364805	+	10.6969	1.72751	1.15121	1.18854	0.265424	0.523561	0.769883	-0.37729	-1.2989	1.17333	1.52404	-2.11092	1.25118
AP001160.3	11	62786023	62786786	-	10.6354	2.00554	1.11734	1.18171	0.760154	0.888308	0.897961	-0.155275	-1.11363	1.00396	1.11804	-2.09255	1.6873
AP001282.1	11	106826392	106827891	-	18.9622	2.7216	2.05596	2.10692	0.6713	0.839256	1.03672	0.0520219	1.03672	2.28382	2.20293	-1.5167	1.63012
AP001324.1	11	74745716	74746115	-	881.631	109.946	97.7445	97.959	0.72413	0.868279	1.01754	0.025079	1.01754	95.297	93.6547	-1.07885	1.11702
AP001357.2	18	13139780	13140490	-	21.1689	3.75324	2.2762	2.3521	0.768641	0.892703	0.991595	-0.0121771	-1.00848	2.41982	2.44034	-1.62063	1.5935
AP001372.2	11	74493366	74498534	+	23.8512	4.16906	2.47282	2.65014	0.270831	0.529354	1.26368	0.337626	1.26368	3.53111	2.79432	-1.21124	1.93419
AP001453.5	11	64241144	64244135	+	42.2811	6.38768	4.37954	4.6979	0.433642	0.677289	1.08628	0.119402	1.08628	4.7733	4.39415	-1.68378	1.98689
AP001505.1	21	44978832	44979275	+	18.8039	2.55514	2.06932	2.08932	0.951151	0.979305	0.980183	-0.0288775	-1.02022	2.16033	2.20401	-1.50532	1.44625
AP001527.2	11	102109827	102110458	-	14.5836	2.37881	1.53777	1.6204	0.355923	0.61176	1.2138	0.279531	1.2138	1.55274	1.27924	-1.42054	2.0929
AP001816.1	4	101347780	101348884	+	27.5878	4.12332	2.92791	3.06532	0.0215464	0.123913	0.621079	-0.687151	-1.6101	2.50455	4.03257	-2.45473	-1.0561
AP001885.3	11	67252336	67261546	-	12.2564	2.11341	1.31987	1.36182	0.0667151	0.240201	1.56953	0.650335	1.56953	1.69045	1.07704	-1.04165	2.56604
AP001931.1	11	57741779	57804772	+	184.327	26.7059	20.2459	20.4808	0.0387762	0.176062	0.805325	-0.312357	-1.24174	18.2	22.5996	-1.52589	-1.0105
AP001931.2	11	57712582	57818432	+	938.092	113.462	103.881	104.232	0.0708693	0.247835	0.898883	-0.153794	-1.11249	97.5625	108.537	-1.25111	1.01088
AP001972.5	11	75260129	75262467	-	12.5712	3.06088	1.01036	1.3968	0.908209	0.96198	1.36896	0.45308	1.36896	1.78823	1.30627	-2.73563	5.12671
AP002360.2	11	76435559	76444688	-	30.2447	4.83968	3.26193	3.36052	0.202233	0.45317	1.22804	0.296354	1.22804	4.14488	3.3752	-1.14859	1.73216
AP002381.2	11	72793624	72814055	-	10.4765	1.42124	1.13986	1.16405	0.251382	0.50814	1.30181	0.380516	1.30181	1.26991	0.9755	-1.28714	2.18132
AP002387.2	11	71448674	71452158	+	11.1373	1.69172	1.20527	1.23748	0.210721	0.462355	1.36831	0.452394	1.36831	1.43963	1.05213	-1.23012	2.30311
AP002414.4	18	12067173	12068418	-	120.931	22.9706	12.7222	13.4368	0.0661635	0.239121	1.22283	0.29022	1.22283	11.5214	9.42197	-1.01799	1.52221
AP002472.1	18	3580169	3580755	+	13.3692	2.31894	1.42888	1.48547	0.828441	0.920661	1.10064	0.138341	1.10064	1.54171	1.40074	-1.58683	1.9223
AP002490.1	11	72014291	72020911	+	18.635	3.45062	1.8869	2.07056	0.871802	0.943601	1.08787	0.121508	1.08787	2.65961	2.44478	-1.4777	1.7488
AP002748.4	11	66473490	66480234	-	13.5521	2.36768	1.38514	1.50578	0.197132	0.44735	0.701492	-0.511502	-1.42553	1.25217	1.785	-2.86477	1.40973
AP002748.5	11	66509079	66533614	+	14.3962	3.56666	1.0647	1.59958	0.000877679	0.0153044	0.200673	-2.31708	-4.98322	0.552679	2.75412	-13.7605	-1.80462
AP002761.4	11	73238975	73242336	+	68.0821	13.707	7.01046	7.56468	2.02388e-05	0.000927201	0.475874	-1.07135	-2.1014	5.5856	11.7376	-2.71326	-1.62751
AP002784.2	11	94188449	94188998	-	124.208	16.115	13.7086	13.8009	0.477478	0.712521	0.942382	-0.0856154	-1.06114	12.5259	13.2917	-1.26051	1.11944
AP002851.1	8	102656464	102687119	+	10.9718	1.65739	1.17882	1.21909	0.658122	0.831344	0.901073	-0.150285	-1.10979	1.21529	1.34871	-1.94891	1.58238
AP002990.1	11	62559603	62591532	-	46.5423	8.06593	4.79957	5.17136	0.541018	0.759899	1.15804	0.211686	1.15804	6.41934	5.54328	-1.37715	1.84684
AP003068.2	11	65177606	65181835	-	30.4828	4.45764	3.31431	3.38698	0.109971	0.32054	0.767877	-0.381053	-1.30229	3.17285	4.13197	-1.82459	1.07584
AP003108.2	11	61429220	61485823	+	12.6752	2.47225	1.22651	1.40836	0.470733	0.707361	0.904412	-0.144947	-1.10569	1.46025	1.61459	-2.6489	2.1667
AP003119.1	11	76759916	76768623	-	9.5649	1.60269	1.03327	1.06277	0.472827	0.709124	0.837519	-0.255806	-1.194	0.912287	1.08927	-2.10008	1.47308
AP003119.3	11	76800364	76804556	+	136.304	20.4021	14.7333	15.1449	0.577874	0.784219	0.908529	-0.138396	-1.10068	12.6167	13.8869	-1.42709	1.17795
AP003307.2	11	108008678	108009283	-	17.3836	2.98614	1.867	1.93151	0.224713	0.478965	1.31497	0.395035	1.31497	2.41826	1.83902	-1.18498	2.04901
AP003352.1	8	98041726	98044122	+	14.8233	2.2575	1.59913	1.64703	0.549149	0.76593	1.13789	0.186364	1.13789	1.73188	1.52201	-1.47246	1.90654
AP003419.1	11	67351572	67373585	-	49.1825	9.09428	4.71794	5.46472	0.0266511	0.140916	0.505027	-0.985567	-1.98009	3.21928	6.37447	-3.88869	-1.00825
AP003486.1	11	130866254	130870248	-	19.857	3.79442	2.10896	2.20633	0.243922	0.499746	0.747969	-0.41895	-1.33695	2.08367	2.78577	-2.13177	1.19263
AP003498.1	11	71673885	71818239	-	19.7074	2.86005	2.15667	2.18972	0.705562	0.856959	0.913979	-0.129767	-1.09412	2.01842	2.20839	-1.6471	1.37592
AP005431.2	18	3025069	3025388	-	15.523	2.22887	1.68422	1.72478	0.0960313	0.296904	0.68919	-0.537027	-1.45098	1.39775	2.02811	-2.26178	1.07431
AP006222.1	1	257864	359682	-	21.5111	3.21465	2.3381	2.39012	0.0608807	0.228188	1.41338	0.499151	1.41338	2.98951	2.11515	-1.02358	2.04475
AP006333.1	11	64103188	64119174	+	19.7911	2.749	2.17717	2.19901	0.626026	0.814209	0.919276	-0.121431	-1.08781	2.24821	2.44563	-1.56834	1.32536
AP006621.3	11	777578	784298	+	24.9236	3.66602	2.73421	2.76928	0.301441	0.555956	0.823497	-0.280166	-1.21433	2.43652	2.95875	-1.73611	1.17734
AP006621.5	11	779617	780756	+	23.596	3.11058	2.57494	2.62178	0.191777	0.441205	0.795379	-0.330286	-1.25726	2.38893	3.00351	-1.84996	1.17033
AP006623.1	11	856880	859796	-	27.1282	3.78901	2.92115	3.01424	0.216817	0.469352	0.812677	-0.299245	-1.2305	2.99845	3.68959	-1.80237	1.19036
AP1AR	4	112231740	112273111	+	129.11	16.4858	14.2339	14.3455	0.00379313	0.041917	1.28315	0.359687	1.28315	15.4879	12.0702	1.09839	1.49899
AP1B1	22	29327680	29423180	-	1268.7	153.746	140.87	140.966	0.308606	0.563907	0.959627	-0.0594537	-1.04207	137.402	143.183	-1.12971	1.04033
AP1G1	16	71729000	71809202	-	1166.55	138.37	129.409	129.617	0.862098	0.938289	1.00891	0.012791	1.00891	132.788	131.616	-1.09096	1.11048
AP1G2	14	23559565	23568071	-	594.115	71.38	65.8491	66.0128	0.928359	0.968894	1.00455	0.00654622	1.00455	68.9381	68.626	-1.09334	1.10331
AP1M1	19	16197578	16245908	+	769.736	98.8688	85.2945	85.5263	0.0714525	0.248966	0.917211	-0.124674	-1.09026	84.6331	92.2722	-1.1979	1.00777
AP1M2	19	10572671	10587316	-	184.935	26.6884	20.0468	20.5483	0.297071	0.551884	1.09955	0.136919	1.09955	24.2779	22.0798	-1.09965	1.32949
AP1S1	7	101154456	101161597	+	592.202	73.1863	65.6063	65.8002	0.456064	0.695577	0.962762	-0.0547487	-1.03868	66.749	69.3307	-1.1609	1.07605
AP1S2	X	15825806	15854932	-	131.066	16.3057	14.4314	14.5629	0.182814	0.429473	0.884017	-0.177853	-1.1312	14.2869	16.1614	-1.38584	1.08301
AP1S3	2	223751686	223838028	-	568.69	71.0934	62.6419	63.1877	0.287319	0.544586	0.955861	-0.0651269	-1.04618	67.1608	70.262	-1.1418	1.04323
AP2A1	19	49766968	49807114	+	2043.22	244.265	226.589	227.024	0.0373881	0.172462	0.918112	-0.123257	-1.08919	211.32	230.168	-1.17844	-1.0067
AP2A2	11	924894	1012246	+	1280	158.191	141.877	142.222	0.78394	0.900884	0.988465	-0.016738	-1.01167	147.369	149.089	-1.09829	1.0731
AP2B1	17	35578046	35726414	+	3766.17	442.967	418.033	418.463	0.488866	0.722611	0.976485	-0.0343306	-1.02408	423.331	433.525	-1.10176	1.05055
AP2M1	3	184174689	184184092	+	2556.3	318.157	283.183	284.034	0.000232633	0.00586318	0.841924	-0.248238	-1.18776	261.333	310.4	-1.28184	-1.10057
AP2S1	19	46838136	46850847	-	882.294	107.093	97.8521	98.0326	0.407497	0.655246	1.0412	0.0582508	1.0412	100.696	96.7108	-1.06839	1.15824
AP3B1	5	78002326	78294699	-	580.611	71.4322	64.2966	64.5123	0.467638	0.705016	0.968533	-0.0461268	-1.03249	66.7445	68.913	-1.13098	1.06092
AP3B2	15	82659281	82709947	-	10.7921	1.67393	1.13922	1.19912	0.292962	0.548808	0.807857	-0.307828	-1.23784	1.16823	1.44609	-2.28532	1.49148
AP3D1	19	2100988	2164469	-	2015.93	239.73	223.912	223.992	0.414999	0.660906	0.971893	-0.0411299	-1.02892	222.048	228.469	-1.10489	1.04366
AP3M1	10	74120255	74151064	-	657.259	77.7375	72.98	73.0288	0.94284	0.975151	1.00308	0.00444185	1.00308	74.1664	73.9384	-1.0884	1.09512
AP3M2	8	42152946	42171674	+	142.342	23.1755	15.6034	15.8158	0.0897969	0.2852	1.23774	0.307712	1.23774	17.8072	14.3868	-1.01575	1.55613
AP3S1	5	115841592	115914082	+	318.297	38.6779	35.3027	35.3664	0.429929	0.674202	1.04682	0.0660176	1.04682	36.5491	34.9143	-1.0797	1.18317
AP3S2	15	89830599	89894639	-	455.43	55.9705	50.468	50.6034	0.453962	0.694015	0.958102	-0.0617492	-1.04373	50.9979	53.228	-1.17128	1.07518
AP4B1	1	113894194	113905202	-	82.8954	11.2279	9.14201	9.2106	0.102296	0.308219	1.18799	0.248524	1.18799	10.3691	8.72826	-1.03753	1.4643
AP4E1	15	50908672	51005896	+	247.419	30.1999	27.4038	27.491	0.245794	0.501894	1.08107	0.112458	1.08107	28.5724	26.4298	-1.06974	1.25021
AP4M1	7	100101549	100110346	+	199.112	24.5198	22.081	22.1236	0.857173	0.936412	0.986577	-0.0194961	-1.01361	22.2401	22.5427	-1.1681	1.13695
AP4S1	14	31025106	31130997	+	100.563	13.4759	11.1073	11.1737	0.906336	0.961415	0.996785	-0.0046458	-1.00323	10.9798	11.0152	-1.24357	1.23559
AP5B1	11	65773898	65780977	-	742.178	92.4161	82.2835	82.4642	0.854786	0.935197	0.99179	-0.0118928	-1.00828	78.7165	79.3681	-1.09971	1.08173
AP5M1	14	57268924	57298743	+	268.399	34.149	29.7221	29.8221	0.412024	0.65823	0.949756	-0.0743707	-1.0529	30.2208	31.8196	-1.19548	1.07837
AP5S1	20	3820524	3828839	+	341.88	41.6506	37.8758	37.9867	0.351714	0.607226	0.949726	-0.0744169	-1.05294	38.2324	40.2563	-1.1893	1.07272
AP5Z1	7	4775615	4794398	+	365.092	48.2558	40.2052	40.5658	0.542273	0.760671	0.958706	-0.0608391	-1.04307	36.4922	38.064	-1.19235	1.09591
APAF1	12	98645290	98735434	+	204.883	25.0339	22.7002	22.7648	0.863186	0.938652	1.01315	0.0188422	1.01315	23.798	23.4892	-1.12924	1.15913
APBA1	9	69427532	69672372	-	18.3572	2.95562	1.92294	2.03969	0.31865	0.57502	0.826184	-0.275466	-1.21038	2.16093	2.61556	-1.92672	1.31514
APBA2	15	28884483	29118316	+	393.009	51.819	43.4959	43.6677	0.371933	0.624808	0.937739	-0.0927422	-1.0664	43.0332	45.8904	-1.22936	1.08104
APBA3	19	3750772	3761693	-	178.603	23.2478	19.6946	19.8447	0.195634	0.446181	1.11867	0.161779	1.11867	21.6181	19.3249	-1.08008	1.35162
APBB1	11	6395124	6419415	-	212.156	26.8314	23.4522	23.5729	0.0023764	0.0305361	0.807159	-0.309075	-1.23891	20.5409	25.4484	-1.40347	-1.09365
APBB1IP	10	26438341	26567804	+	33.0486	5.30645	3.56857	3.67207	0.225207	0.479392	0.78009	-0.358288	-1.2819	3.1144	3.99236	-1.90617	1.15998
APBB2	4	40810027	41216715	-	166.434	23.4079	18.2938	18.4927	0.349202	0.605216	1.08048	0.111667	1.08048	20.7945	19.2456	-1.09139	1.27412
APBB3	5	140558268	140564782	-	39.4008	5.60124	4.32354	4.37786	0.563453	0.775564	0.92348	-0.114847	-1.08286	4.39544	4.75965	-1.47819	1.26063
APC	5	112707498	112846240	+	321.148	42.2281	35.3053	35.6831	0.415936	0.661501	0.956646	-0.0639433	-1.04532	38.137	39.8654	-1.1749	1.07524
APC2	19	1446302	1473245	+	98.8056	13.9188	10.7666	10.9784	0.408718	0.656343	0.926661	-0.109887	-1.07914	11.6095	12.5283	-1.37363	1.17954
APEH	3	49674014	49683972	+	842.703	102.979	93.5361	93.6336	0.242817	0.4989	0.954431	-0.0672873	-1.04774	93.5073	97.9718	-1.13651	1.03529
APEX1	14	20455191	20457773	+	1774.08	214.62	196.788	197.12	0.0798544	0.266726	1.08296	0.114979	1.08296	203.738	188.131	-1.01207	1.18695
APEX2	X	55000363	55009058	+	542.275	68.4233	60.1017	60.2528	0.622983	0.812685	1.02544	0.0362409	1.02544	60.9162	59.4051	-1.10485	1.16178
APH1A	1	150265399	150269581	-	1249.99	158.384	138.308	138.887	0.0324248	0.158927	1.08172	0.113328	1.08172	135.58	125.337	1.00745	1.16146
APH1B	15	63276018	63309127	+	120.468	17.0746	13.2865	13.3853	0.376876	0.627946	0.909472	-0.136898	-1.09954	12.934	14.2214	-1.36003	1.12493
API5	11	43311963	43344530	+	855.227	104.078	94.861	95.0252	0.0337331	0.162138	1.10285	0.141237	1.10285	98.2184	89.0587	1.0086	1.20591
API5P1	X	116106921	116108431	-	59.2207	7.59307	6.54511	6.58008	0.684331	0.846632	1.05477	0.0769298	1.05477	6.73257	6.38297	-1.21245	1.3489
APIP	11	34853094	34916380	-	102.349	12.741	11.3474	11.3721	0.475084	0.71105	1.06507	0.0909463	1.06507	11.9353	11.2061	-1.11794	1.26815
APLF	2	68467572	68655863	+	13.6079	2.00599	1.47061	1.51199	0.490998	0.724349	0.844587	-0.243681	-1.18401	1.50548	1.7825	-1.92733	1.37482
APLN	X	129645259	129654957	-	25.1105	5.34914	2.66124	2.79006	0.142328	0.37102	0.685066	-0.545686	-1.45971	2.47296	3.60981	-2.27031	1.06549
APLP1	19	35867899	35879793	+	919.244	128.308	101.254	102.138	0.000685985	0.0131085	0.788745	-0.342369	-1.26784	93.6137	118.687	-1.42832	-1.12538
APLP2	11	130068147	130144812	+	2184.02	260.273	242.485	242.669	0.120992	0.338033	0.943076	-0.0845533	-1.06036	236.792	251.084	-1.14367	1.01717
APMAP	20	24962925	24992752	-	1471.6	179.073	163.022	163.511	0.369453	0.623566	0.964374	-0.0523355	-1.03694	167.836	174.036	-1.12883	1.04983
APOBEC3B	22	38982347	38992805	+	191.332	32.4146	20.4105	21.2591	1.63941e-05	0.000779857	1.77359	0.826669	1.77359	29.4608	16.6109	1.45834	2.15698
APOBEC3C	22	39014257	39020353	+	824.104	100.746	91.3566	91.5671	0.604595	0.801847	1.02115	0.0301974	1.02115	88.5017	86.6685	-1.06449	1.11
APOC1	19	44914247	44919350	+	259.584	35.0575	28.5216	28.8427	0.602397	0.800365	1.04955	0.0697646	1.04955	30.7331	29.2823	-1.17916	1.2989
APOE	19	44905791	44909394	+	54.0277	11.5533	5.6208	6.00307	0.223495	0.477716	0.686732	-0.542181	-1.45617	4.88175	7.10868	-2.39629	1.13009
APOH	17	66212033	66256526	-	90.0444	15.414	9.63095	10.0049	0.139947	0.367481	1.27337	0.348652	1.27337	12.2758	9.64042	-1.10633	1.79388
APOM	6	31652416	31658211	+	10.2216	1.58037	1.10078	1.13573	0.790839	0.902951	1.06391	0.0893762	1.06391	1.29421	1.21647	-1.61236	1.82503
APOO	X	23833353	23907939	-	107.06	13.9262	11.8393	11.8955	0.837903	0.92609	1.02354	0.0335608	1.02354	12.0367	11.7599	-1.19641	1.25339
APOOL	X	85003877	85093317	+	243.359	32.3422	26.8517	27.0399	0.0162146	0.103667	0.831698	-0.265868	-1.20236	25.4666	30.62	-1.39344	-1.03748
APP	21	25880550	26171129	-	4900.27	634.473	542.338	544.475	0.00998194	0.0779351	0.897671	-0.155742	-1.11399	489.662	545.481	-1.20388	-1.03082
APPBP2	17	60443158	60526243	-	202.741	24.8851	22.4593	22.5268	0.0625744	0.231639	0.883164	-0.179246	-1.13229	20.6309	23.3603	-1.29364	1.00901
APPL1	3	57227726	57278106	+	334.475	44.6356	36.9274	37.1639	0.464926	0.702919	1.05842	0.081908	1.05842	40.2835	38.0602	-1.09116	1.22237
APPL2	12	105173297	105236204	-	218.742	30.8827	23.2119	24.3047	0.564121	0.776113	0.963053	-0.0543129	-1.03836	28.422	29.5124	-1.19045	1.10411
APRT	16	88809339	88811938	-	1690.64	196.132	187.739	187.849	0.763372	0.889824	0.987792	-0.0177205	-1.01236	186.345	188.648	-1.0967	1.07009
APTR	7	77657659	77696268	-	28.9281	4.26351	3.15739	3.21423	0.107525	0.316732	1.31713	0.397402	1.31713	3.79395	2.88046	-1.07303	1.86154
APTX	9	32886601	33025131	-	248.004	30.8002	27.4848	27.556	0.94924	0.978073	1.00082	0.00118767	1.00082	27.41	27.3874	-1.15471	1.15661
AQP11	11	77589391	77610357	+	54.0229	7.65237	5.88937	6.00255	0.620939	0.811498	1.0916	0.126445	1.0916	6.60895	6.05437	-1.26665	1.50933
AQP3	9	33441156	33447597	-	140.634	26.6672	14.1219	15.626	0.0285597	0.146636	1.31197	0.391737	1.31197	22.2072	16.9266	1.02573	1.6781
AQR	15	34851782	34969743	-	756.642	89.1782	83.998	84.0713	0.290738	0.54741	1.04704	0.0663116	1.04704	86.4477	82.5642	-1.04493	1.14554
AR	X	67544021	67730620	+	808.428	104.399	89.2573	89.8253	0.987462	0.993966	1.00405	0.00582518	1.00405	91.8325	91.4624	-1.17764	1.18719
ARAF	X	47561100	47571921	+	926.827	108.772	102.904	102.981	0.59794	0.797218	1.02148	0.0306669	1.02148	105.618	103.397	-1.06385	1.11005
ARAP1	11	72685069	72793600	-	799.345	96.157	88.6845	88.8161	0.504564	0.734741	0.969024	-0.0453964	-1.03197	89.0408	91.8871	-1.1368	1.06746
ARAP2	4	35948221	36244515	-	54.399	8.63628	5.77355	6.04434	0.0153726	0.100887	1.39273	0.477918	1.39273	5.75825	4.1345	1.06952	1.81363
ARAP3	5	141653401	141682231	-	213.291	29.0787	23.3896	23.699	0.27784	0.535837	0.929639	-0.105257	-1.07569	25.0394	26.9345	-1.24998	1.08027
ARCN1	11	118572390	118603034	+	1125.81	135.873	124.928	125.09	0.834005	0.92405	1.00821	0.0117919	1.00821	128.822	127.774	-1.07902	1.0968
AREG	4	74445136	74455006	+	253.08	40.451	26.1211	28.1199	0.0950668	0.29472	1.1268	0.172235	1.1268	36.779	32.6402	-1.02111	1.29648
AREL1	14	74653437	74713109	-	515.374	61.8741	57.1651	57.2637	0.259619	0.517282	0.944897	-0.0817714	-1.05832	56.3192	59.6036	-1.17882	1.05249
ARF1	1	228082660	228099213	+	3554.14	419.582	394.54	394.904	0.0417923	0.183325	1.06997	0.0975683	1.06997	416.816	389.56	1.00283	1.1416
ARF3	12	48935723	48957488	-	2230.76	318.033	244.563	247.862	0.705372	0.856944	1.01274	0.0182569	1.01274	219.952	217.187	-1.06008	1.08726
ARF4	3	57571363	57598221	-	692.024	84.7605	76.8045	76.8915	0.282374	0.540374	0.950302	-0.0735426	-1.0523	75.489	79.4368	-1.15729	1.04512
ARF5	7	127588386	127591701	+	759.228	96.6472	84.038	84.3586	0.0700241	0.246117	0.900547	-0.151127	-1.11044	82.3001	91.389	-1.24546	1.01005
ARF6	14	49893082	49897055	+	1659.52	206.718	184.099	184.391	0.204004	0.454658	0.949592	-0.0746205	-1.05308	184.313	194.097	-1.14326	1.0309
ARFGAP1	20	63272785	63289791	+	930.956	112.99	103.353	103.44	0.970895	0.98781	1.0037	0.00532963	1.0037	103.94	103.556	-1.09057	1.09866
ARFGAP2	11	47164299	47177126	-	439.135	53.9362	48.6609	48.7927	0.16684	0.406483	0.927197	-0.109053	-1.07852	48.3519	52.1484	-1.20531	1.0362
ARFGAP3	22	42796502	42858107	-	137.135	18.6664	15.0979	15.2373	0.49213	0.72542	0.935328	-0.0964556	-1.06914	13.6149	14.5563	-1.27764	1.11773
ARFGEF1	8	67173511	67343782	-	492.38	63.2389	54.5364	54.7089	0.0235569	0.131068	0.874092	-0.194144	-1.14404	51.1021	58.4632	-1.28315	-1.02002
ARFGEF2	20	48921711	49036694	+	783.35	97.7305	86.8017	87.0389	0.124812	0.3431	1.07167	0.0998611	1.07167	93.6885	87.4228	-1.02009	1.17155
ARFGEF3	6	138161939	138344664	+	424.536	54.9274	47.0147	47.1706	0.569632	0.780108	0.966713	-0.0488406	-1.03443	47.9236	49.5737	-1.17053	1.0939
ARFIP1	4	152779937	152918464	+	157.778	19.3642	17.4984	17.5309	0.71711	0.864213	1.02527	0.0360069	1.02527	17.6365	17.2018	-1.13587	1.194
ARFIP2	11	6474683	6481480	-	403.069	50.5688	44.5662	44.7855	0.397179	0.645753	0.946796	-0.0788751	-1.05619	44.9351	47.4602	-1.22358	1.09684
ARFRP1	20	63698642	63708026	-	300.99	40.4946	33.2822	33.4434	0.860575	0.937698	1.01992	0.0284588	1.01992	34.7965	34.1168	-1.14487	1.19094
ARGLU1	13	106541673	106568138	-	444.561	53.6304	49.2685	49.3956	0.0234201	0.130653	1.12834	0.174208	1.12834	53.5499	47.4588	1.01796	1.2507
ARHGAP1	11	46677080	46700620	-	1414.98	168.496	157.084	157.22	0.0177519	0.109312	0.91627	-0.126156	-1.09138	151.893	165.773	-1.17052	-1.01759
ARHGAP10	4	147732063	148072777	+	97.1642	14.1084	10.6799	10.796	0.0369615	0.171397	0.8103	-0.303472	-1.23411	10.2482	12.6474	-1.50183	-1.01412
ARHGAP11A	15	32615144	32639942	+	1232.81	166.542	135.669	136.979	0.000318756	0.0073268	1.23771	0.307676	1.23771	161.411	130.411	1.12187	1.36552
ARHGAP11B	15	30624494	30685607	+	83.8203	13.0864	9.12864	9.31337	0.0589578	0.224012	1.26534	0.33952	1.26534	11.32	8.94622	-1.00368	1.60697
ARHGAP12	10	31805398	31928877	-	468.298	62.9546	51.7844	52.0331	0.0758558	0.258584	1.11075	0.151537	1.11075	57.3458	51.6279	-1.00931	1.24526
ARHGAP17	16	24919389	25015667	-	535.966	72.3678	59.1577	59.5518	0.616846	0.809354	0.977165	-0.0333266	-1.02337	54.2838	55.5524	-1.12898	1.07801
ARHGAP18	6	129576132	129710178	-	163.38	23.7598	17.8673	18.1533	0.640058	0.821309	1.04582	0.0646344	1.04582	19.9572	19.0828	-1.20182	1.31448
ARHGAP19	10	97222173	97292674	-	92.3537	13.2349	10.0098	10.2615	0.0424923	0.185208	1.31864	0.399046	1.31864	12.6024	9.55715	1.00617	1.72813
ARHGAP21	10	24583609	24723888	-	742.448	93.4253	82.1589	82.4942	0.0744909	0.256087	1.09044	0.124913	1.09044	90.2363	82.7521	-1.01054	1.20159
ARHGAP22	10	48446034	48656266	-	49.5115	7.21009	5.35688	5.50128	0.214097	0.46598	0.843338	-0.245817	-1.18576	5.39831	6.40111	-1.68002	1.19486
ARHGAP23	17	38419280	38512386	+	172.742	23.5136	18.9741	19.1935	0.000264544	0.00644031	0.731658	-0.45076	-1.36676	16.9816	23.2097	-1.57236	-1.18804
ARHGAP24	4	85475150	86002669	+	53.3347	6.95636	5.87096	5.92608	0.478166	0.713216	0.908906	-0.137796	-1.10022	5.83155	6.41601	-1.44155	1.19088
ARHGAP26	5	142770377	143229012	+	1214.36	166.267	133.516	134.929	0.000248386	0.00614166	1.20017	0.263239	1.20017	159.342	132.766	1.10676	1.30146
ARHGAP27	17	45393902	45434422	-	205.065	27.6183	22.5054	22.785	0.212132	0.463709	1.08394	0.116283	1.08394	26.0412	24.0246	-1.05536	1.23997
ARHGAP27P1-BPTFP1-KPNA2P3	17	64749663	64781708	-	19.1705	3.43153	2.04396	2.13006	0.192157	0.441614	1.43314	0.519176	1.43314	2.55152	1.78038	-1.13653	2.3343
ARHGAP29	1	94148988	94275069	-	402.047	57.9604	44.2586	44.6719	0.0259141	0.138652	0.827296	-0.273525	-1.20876	38.9509	47.0822	-1.42118	-1.02809
ARHGAP31	3	119294383	119420715	+	32.1309	4.44461	3.50395	3.5701	0.323622	0.579885	0.85883	-0.219555	-1.16437	3.47748	4.04909	-1.65717	1.22231
ARHGAP32	11	128965060	129279325	-	182.754	23.7127	20.1697	20.306	0.857849	0.936606	0.989856	-0.0147097	-1.01025	21.4298	21.6494	-1.18419	1.16029
ARHGAP33	19	35774532	35788823	+	105.468	16.8728	11.2777	11.7186	0.351587	0.607092	1.11693	0.159539	1.11693	14.3927	12.886	-1.11427	1.39009
ARHGAP35	19	46860997	47005078	+	2637.98	336.588	291.011	293.109	0.125854	0.344394	1.06926	0.0966168	1.06926	325.347	304.272	-1.0212	1.16756
ARHGAP39	8	144529179	144605817	-	316.791	39.1747	35.0991	35.1991	0.372089	0.624808	0.942197	-0.085899	-1.06135	33.7992	35.8727	-1.21612	1.07959
ARHGAP4	X	153907367	153935000	-	10.5012	1.96783	1.00027	1.1668	0.0921022	0.289554	0.645482	-0.631551	-1.54923	0.940757	1.45745	-3.71822	1.54919
ARHGAP42	11	100687288	100993942	+	89.4617	12.6468	9.85568	9.94019	0.480531	0.715147	1.09382	0.129376	1.09382	10.0676	9.20403	-1.15172	1.37797
ARHGAP44	17	12789498	12991644	+	61.0194	9.48514	6.71654	6.77993	0.557401	0.771968	1.10237	0.140609	1.10237	7.20713	6.53785	-1.18266	1.43719
ARHGAP45	19	1065923	1086629	+	118.939	15.9358	13.1024	13.2154	0.361715	0.616477	0.907027	-0.140782	-1.1025	13.0859	14.4272	-1.36068	1.11943
ARHGAP5	14	32076114	32159729	+	712.918	89.8371	78.856	79.2131	0.301473	0.555956	0.934991	-0.0969762	-1.06953	74.8095	80.0109	-1.22945	1.0748
ARHGAP5-AS1	14	32074946	32076794	-	26.161	4.888	2.76681	2.90678	0.0165387	0.104681	0.642353	-0.638563	-1.55678	2.62136	4.08087	-2.19087	-1.10621
ARHGAP8	22	44752558	44862789	+	22.4235	3.33928	2.41898	2.4915	0.859288	0.937327	1.03068	0.0435996	1.03068	2.48589	2.41189	-1.54024	1.6362
ARHGDIA	17	81867721	81871379	-	5579.89	709.916	618.638	619.988	0.293516	0.549293	1.05343	0.0750965	1.05343	645.961	613.197	-1.04986	1.16505
ARHGEF1	19	41883173	41930151	+	1497.56	175.07	166.227	166.396	0.988351	0.994513	0.999715	-0.000411347	-1.00029	165.487	165.534	-1.09432	1.09369
ARHGEF10	8	1823926	1958642	+	575.225	72.4691	63.6503	63.9139	0.615361	0.808654	1.03342	0.047429	1.03342	67.4365	65.2555	-1.09853	1.17318
ARHGEF10L	1	17539698	17697875	+	169.545	21.8626	18.6801	18.8383	0.308492	0.5639	0.92765	-0.108348	-1.07799	19.4897	21.0098	-1.25526	1.0802
ARHGEF11	1	156934840	157045371	-	644.783	75.1099	71.6025	71.6426	0.696184	0.852744	0.984626	-0.0223517	-1.01561	72.2746	73.4031	-1.10415	1.07046
ARHGEF12	11	120336413	120489938	+	1089.2	128.641	120.9	121.022	0.763001	0.889569	1.0133	0.0190576	1.0133	121.86	120.261	-1.08249	1.11147
ARHGEF16	1	3454665	3481114	+	44.6763	7.81131	4.62651	4.96404	0.0333364	0.161006	1.3626	0.446358	1.3626	6.94197	5.09466	1.02282	1.81524
ARHGEF17	11	73308276	73369389	+	312.08	42.4359	34.2025	34.6756	0.00112311	0.0181492	0.777713	-0.36269	-1.28582	32.6665	42.0033	-1.47005	-1.12468
ARHGEF18	19	7395113	7472485	+	886.867	112.095	97.7542	98.5407	0.434182	0.677837	1.03208	0.0455544	1.03208	108.381	105.012	-1.05678	1.12567
ARHGEF19	1	16197854	16212653	-	51.3104	7.11132	5.59959	5.70116	0.132437	0.355558	1.2299	0.298537	1.2299	6.67554	5.42773	-1.09258	1.65269
ARHGEF2	1	155946851	156007071	-	395.508	50.101	43.8061	43.9453	0.162199	0.39982	0.926352	-0.110368	-1.0795	43.9619	47.4571	-1.20359	1.03284
ARHGEF25	12	57610180	57617246	+	69.7351	8.55398	7.73114	7.74834	0.842434	0.927885	1.01579	0.0225966	1.01579	8.01959	7.89496	-1.20473	1.24307
ARHGEF26	3	154121003	154257828	+	90.424	12.4608	9.88552	10.0471	0.579131	0.784914	1.04943	0.069603	1.04943	11.492	10.9507	-1.13821	1.25351
ARHGEF28	5	73626158	73941994	+	435.499	62.4056	46.987	48.3888	0.0438316	0.188757	0.884085	-0.177743	-1.13111	52.3169	59.1763	-1.27241	-1.0055
ARHGEF3	3	56727418	57079330	-	95.4922	12.2596	10.5422	10.6102	0.475018	0.71105	0.924872	-0.112675	-1.08123	9.94768	10.7557	-1.34233	1.14821
ARHGEF37	5	149551947	149634969	+	27.3041	4.45764	2.89818	3.03378	0.217087	0.469572	0.811146	-0.301967	-1.23282	3.18118	3.92183	-1.74003	1.14486
ARHGEF39	9	35658875	35675867	-	196.831	27.7045	21.4953	21.8701	9.25665e-05	0.00296833	1.39214	0.4773	1.39214	27.5303	19.7756	1.21738	1.59198
ARHGEF4	2	130836916	131047264	+	10.1613	1.89455	1.02058	1.12903	0.146156	0.376692	1.45228	0.538321	1.45228	1.54604	1.06456	-1.35444	2.85669
ARHGEF40	14	21070273	21090249	+	587.147	72.4736	65.1169	65.2386	0.764493	0.890573	1.01379	0.0197633	1.01379	64.0864	63.2145	-1.09589	1.12633
ARHGEF5	7	144355288	144380633	+	21.9582	3.64962	2.39326	2.4398	0.0446953	0.190758	0.683571	-0.548838	-1.46291	2.02898	2.9682	-2.10118	-1.01852
ARHGEF7	13	111114559	111305738	+	358.175	44.3107	39.7185	39.7973	0.362077	0.616814	1.05345	0.0751179	1.05345	40.3816	38.3328	-1.0716	1.18921
ARHGEF9	X	63634967	63809275	-	126.773	17.2843	13.9129	14.0859	0.652473	0.828699	0.967634	-0.0474663	-1.03345	15.159	15.6661	-1.23015	1.15181
ARID1A	1	26693236	26782105	+	1557.15	191.198	172.585	173.017	0.20181	0.452788	1.05317	0.0747359	1.05317	184.335	175.029	-1.03337	1.14617
ARID1B	6	156776020	157210780	+	878.868	102.869	97.5809	97.652	0.372562	0.625167	1.03494	0.0495472	1.03494	101.112	97.6981	-1.04653	1.12094
ARID2	12	45729706	45908041	+	408.31	52.1448	44.9723	45.3678	0.872886	0.943979	1.0091	0.0130656	1.0091	49.4966	49.0504	-1.10021	1.12032
ARID3A	19	925781	975940	+	246.493	33.5697	27.2182	27.3881	0.0476367	0.198075	1.13822	0.186776	1.13822	30.8781	27.1285	1.00361	1.29088
ARID3B	15	74541177	74598132	+	62.0303	10.6792	6.5384	6.89225	0.000356093	0.00792697	1.70244	0.767606	1.70244	9.94319	5.84055	1.32683	2.18439
ARID4A	14	58298504	58373888	+	110.622	13.9064	12.2151	12.2914	0.591415	0.793081	0.953341	-0.0689363	-1.04894	11.7473	12.3222	-1.29459	1.1766
ARID4B	1	235131634	235328220	-	436.815	53.514	48.3603	48.535	0.75925	0.887764	1.02676	0.0380997	1.02676	48.4306	47.1684	-1.12257	1.18345
ARID5A	2	96536743	96552635	+	91.349	11.8126	10.0934	10.1499	0.38045	0.630507	0.916153	-0.126339	-1.09152	9.99441	10.9091	-1.34073	1.12532
ARIH1	15	72474330	72602988	+	831.324	100.679	92.1733	92.3693	0.422339	0.667252	0.961786	-0.0562126	-1.03973	87.6637	91.1468	-1.14376	1.05802
ARIH2	3	48918821	48986383	+	665.524	79.189	73.8515	73.9471	0.129539	0.350462	1.07316	0.101872	1.07316	76.9858	71.7372	-1.02493	1.1804
ARIH2P1	18	28651732	28653209	+	11.2129	1.9876	1.15303	1.24588	0.0933787	0.292108	0.641178	-0.641203	-1.55963	0.972745	1.51712	-3.02765	1.2447
ARL1	12	101393116	101407773	-	344.757	41.0834	38.2649	38.3063	0.430798	0.675048	0.958803	-0.060694	-1.04297	37.1233	38.7184	-1.16315	1.06929
ARL13B	3	93980139	94055679	+	150.678	19.568	16.643	16.742	0.0483206	0.199648	1.18198	0.241201	1.18198	18.6366	15.7673	1.00031	1.39664
ARL14EP	11	30323104	30338224	+	138.002	16.9571	15.2696	15.3336	0.761583	0.88868	0.98043	-0.0285139	-1.01996	14.922	15.2199	-1.22471	1.17725
ARL15	5	53883942	54310583	-	69.022	10.8096	7.55737	7.66911	0.309429	0.564548	0.879204	-0.18573	-1.13739	7.73215	8.79449	-1.45711	1.12634
ARL16	17	81681174	81683925	-	146.933	19.8183	16.2043	16.3259	0.510958	0.738595	0.952263	-0.0705685	-1.05013	16.7021	17.5394	-1.26882	1.15057
ARL17A	17	46516702	46579692	-	114.68	16.3321	12.5615	12.7423	0.551283	0.767787	1.05463	0.0767375	1.05463	14.4213	13.6742	-1.1345	1.26185
ARL17B	17	46274784	46361798	-	11.3599	2.0891	1.15727	1.26221	0.541709	0.760214	1.09697	0.133518	1.09697	1.42023	1.29469	-1.89003	2.27433
ARL2	11	65014160	65022185	+	1020.04	134.413	112.766	113.338	0.733638	0.873772	1.01424	0.020406	1.01424	106.639	105.142	-1.08006	1.11105
ARL2BP	16	57245259	57253636	+	617.777	79.5929	68.2763	68.6418	0.00472291	0.0484292	0.861392	-0.215258	-1.16091	66.7585	77.5007	-1.27777	-1.05474
ARL2-SNX15	11	65014182	65040571	+	18.1604	3.31186	1.91756	2.01782	0.49574	0.728647	1.27084	0.345779	1.27084	2.23356	1.75755	-1.36743	2.20843
ARL3	10	102673731	102714398	-	150.793	21.5358	16.5863	16.7547	0.282558	0.540437	1.11564	0.157873	1.11564	18.4789	16.5635	-1.10348	1.37345
ARL4A	7	12686856	12690959	+	164.285	22.8112	17.9098	18.2539	0.962505	0.984954	1.01632	0.0233614	1.01632	20.3328	20.0062	-1.21192	1.25181
ARL4C	2	234493041	234497082	-	2526.21	346.243	279.29	280.69	0.688514	0.848747	0.971319	-0.0419823	-1.02953	288.473	296.991	-1.16427	1.09845
ARL4D	17	43398993	43401138	+	76.6137	12.4426	8.26885	8.51264	0.0630612	0.232889	0.790665	-0.338862	-1.26476	6.51764	8.24324	-1.62487	1.01579
ARL5A	2	151788984	151828493	-	526.623	66.7207	58.324	58.5136	0.0110381	0.083197	1.15154	0.203568	1.15154	63.96	55.5429	1.03709	1.27863
ARL5B	10	18659431	18681640	+	331.267	43.7875	36.4449	36.8075	0.0202252	0.119297	1.16554	0.221001	1.16554	36.3962	31.2268	1.03034	1.31849
ARL6	3	97764521	97801230	+	44.5004	6.41995	4.84102	4.94449	0.494142	0.727192	0.913657	-0.130276	-1.0945	4.62265	5.0595	-1.56838	1.30924
ARL6IP1	16	18791669	18801573	-	2641.41	345.651	291.855	293.49	0.161943	0.399738	1.08946	0.123609	1.08946	320.692	294.359	-1.03253	1.22552
ARL6IP4	12	122980060	122982914	+	1109.55	127.711	123.228	123.283	0.760735	0.888466	0.988849	-0.0161782	-1.01128	121.013	122.378	-1.09134	1.06714
ARL6IP5	3	69084937	69106093	+	649.539	82.9804	71.9111	72.171	0.023871	0.131897	0.885731	-0.175059	-1.12901	65.4619	73.9071	-1.25112	-1.01882
ARL6IP6	2	152717893	152762397	+	151.284	18.8772	16.7575	16.8093	0.0667878	0.240229	1.1403	0.18942	1.1403	18.418	16.1518	-1.01144	1.31517
ARL8A	1	202133404	202144744	-	355.369	45.5319	39.2006	39.4855	0.207871	0.459037	0.906477	-0.141658	-1.10317	38.2331	42.1777	-1.31961	1.08433
ARL8B	3	5122245	5180913	+	751.711	91.8751	83.417	83.5234	0.563259	0.775564	1.02481	0.035355	1.02481	86.8329	84.7308	-1.06333	1.11674
ARMC1	8	65602458	65634218	-	425.893	54.5854	47.1051	47.3214	0.128314	0.348369	1.08182	0.113463	1.08182	51.8842	47.96	-1.02707	1.20202
ARMC10	7	103074881	103099760	+	309.024	37.7936	34.2903	34.336	0.894358	0.954132	0.994988	-0.00724865	-1.00504	34.4802	34.6539	-1.13267	1.12134
ARMC10P1	3	94506766	94507621	-	33.05	4.69614	3.64276	3.67222	0.608677	0.803847	0.932686	-0.100537	-1.07217	3.47214	3.72273	-1.46665	1.27584
ARMC5	16	31458080	31467167	+	231.339	28.4412	25.6657	25.7043	0.767906	0.892391	1.02184	0.0311669	1.02184	25.8458	25.2935	-1.11617	1.16545
ARMC6	19	19033575	19060312	+	426.229	52.599	47.2643	47.3588	0.608052	0.803465	1.02595	0.0369554	1.02595	49.0872	47.8458	-1.09134	1.1487
ARMC7	17	75109952	75130273	+	139.923	18.9702	15.3551	15.5471	0.0640583	0.235361	1.1494	0.200882	1.1494	18.2137	15.8463	-1.01022	1.33463
ARMC8	3	138187248	138298385	+	175.538	21.8131	19.45	19.5042	0.155177	0.389719	1.10644	0.14593	1.10644	20.0895	18.1568	-1.04439	1.27856
ARMC9	2	231198546	231374838	+	118.843	15.1081	13.1606	13.2048	0.925611	0.968064	1.00555	0.0079864	1.00555	13.8553	13.7788	-1.16716	1.18016
ARMCX3	X	101622797	101627844	+	152.971	21.5013	16.5981	16.9968	0.320293	0.576752	0.917211	-0.124674	-1.09026	18.3433	19.999	-1.3169	1.10788
ARMCX5	X	102599168	102604160	+	89.5026	12.1194	9.79241	9.94473	0.174404	0.417094	1.16806	0.224111	1.16806	11.5705	9.90576	-1.0801	1.47364
ARMCX5-GPRASP2	X	102599512	102753531	+	35.4462	5.31307	3.7927	3.93847	0.842097	0.927885	0.951875	-0.0711557	-1.05056	4.39314	4.61525	-1.49121	1.35114
ARMCX6	X	101615118	101618002	-	94.2432	15.349	10.2733	10.4715	0.378845	0.629605	0.865438	-0.208498	-1.15548	10.0834	11.6512	-1.55023	1.1611
ARMH3	10	101845599	102056194	-	155.971	19.7141	17.2506	17.3302	0.47509	0.71105	0.947888	-0.0772121	-1.05498	17.3509	18.3048	-1.25472	1.12735
ARMT1	6	151452258	151470102	+	224.108	31.5292	24.5918	24.9009	0.762066	0.889033	1.02337	0.0333266	1.02337	27.1878	26.5669	-1.1747	1.23024
ARNT	1	150809713	150876709	-	248.466	31.8905	27.4917	27.6073	0.750712	0.88301	0.975113	-0.0363586	-1.02552	27.9032	28.6153	-1.20019	1.14119
ARNT2	15	80404350	80597934	+	425.432	58.9511	46.9139	47.2702	0.000206475	0.00529683	0.784035	-0.35101	-1.27545	43.2266	55.1335	-1.41805	-1.14719
ARNTL	11	13276652	13387267	+	93.9586	13.5513	10.2782	10.4398	0.85842	0.936948	1.01088	0.015613	1.01088	11.0131	10.8945	-1.30397	1.3325
ARPC1A	7	99325898	99366263	+	1050.21	126.21	116.473	116.69	0.442969	0.685314	0.96891	-0.0455649	-1.03209	118.69	122.499	-1.12379	1.055
ARPC1B	7	99374249	99394817	+	1587.17	191.728	176.088	176.352	0.00927434	0.0746383	0.89636	-0.15785	-1.11562	167.231	186.567	-1.2068	-1.03133
ARPC2	2	218217141	218254357	+	1899.38	239.334	210.637	211.042	0.0434509	0.187828	0.92261	-0.116207	-1.08388	196.541	213.027	-1.1718	-1.00256
ARPC3	12	110434823	110450423	-	999.776	125.423	110.852	111.086	0.475161	0.71105	0.971031	-0.04241	-1.02983	105.267	108.407	-1.12135	1.05732
ARPC3P1	20	49134480	49135013	+	9.20615	1.39423	1.00305	1.02291	0.23755	0.493585	1.36135	0.445039	1.36135	1.16644	0.856826	-1.25616	2.32801
ARPC4	3	9792495	9807727	+	1172.07	138.729	130.032	130.23	0.212066	0.463706	0.955323	-0.0659402	-1.04677	131.433	137.58	-1.12833	1.02976
ARPC4-TTLL3	3	9793082	9835402	+	50.152	7.30448	5.5234	5.57244	0.597693	0.797218	1.07178	0.100011	1.07178	5.59426	5.21959	-1.22981	1.4127
ARPC5	1	183620846	183635784	-	733.567	97.4783	81.1574	81.5074	0.368495	0.622946	0.941473	-0.0870086	-1.06217	80.59	85.5999	-1.22001	1.08138
ARPC5L	9	124862130	124877734	+	280.587	37.5719	31.0195	31.1764	0.604758	0.801916	1.03716	0.0526414	1.03716	30.9916	29.8812	-1.13387	1.21971
ARPIN	15	89895006	89912953	-	329.226	39.7815	36.4821	36.5806	0.627637	0.814545	0.97402	-0.0379766	-1.02667	37.4467	38.4455	-1.15347	1.09431
ARPIN-AP3S2	15	89834308	89912883	-	357.916	44.8331	39.6375	39.7685	0.0995104	0.302794	0.904572	-0.144693	-1.1055	38.6556	42.7336	-1.25349	1.02567
ARPP19	15	52547045	52569884	-	2340.07	287.47	259.56	260.008	0.916729	0.965523	1.00315	0.0045349	1.00315	268.995	268.151	-1.07898	1.08579
ARRB1	11	75260122	75351706	-	276.967	41.4318	28.9618	30.7741	0.724572	0.868591	0.972039	-0.0409132	-1.02876	36.5346	37.5856	-1.27893	1.20841
ARRB2	17	4710596	4721500	+	666.699	91.3169	73.1352	74.0777	0.000557704	0.0112528	1.2146	0.280485	1.2146	88.6104	72.9542	1.10396	1.33634
ARRDC1	9	137605685	137615361	+	210.749	26.741	23.3145	23.4166	0.849447	0.932154	1.01075	0.0154292	1.01075	24.7925	24.5287	-1.13241	1.15689
ARRDC1-AS1	9	137615332	137618907	-	101.019	12.7903	11.1524	11.2244	0.765741	0.891006	0.974414	-0.0373935	-1.02626	11.7634	12.0723	-1.2336	1.17128
ARRDC2	19	18001132	18014103	+	257.873	34.326	28.4463	28.6526	0.00285444	0.0343547	1.24098	0.311486	1.24098	33.0818	26.6577	1.09101	1.41158
ARRDC3	5	91368631	91383318	-	271.469	41.5784	29.2272	30.1632	0.909297	0.96221	0.993465	-0.00945864	-1.00658	24.6354	24.7974	-1.14457	1.12966
ARRDC4	15	97960703	97973834	+	21.1675	4.42681	2.21834	2.35195	0.0139679	0.0954339	0.556135	-0.846494	-1.79813	1.85229	3.33064	-2.77266	-1.16612
ARSA	22	50622754	50628174	-	346.665	44.2236	38.3477	38.5184	0.0765982	0.25996	0.8864	-0.17397	-1.12816	35.2933	39.8165	-1.29246	1.01549
ARSB	5	78777209	78986088	-	406.117	47.3348	45.0984	45.1241	0.662116	0.833926	0.980382	-0.0285838	-1.02001	44.7805	45.6766	-1.12639	1.08263
ARSD	X	2903972	2929350	-	330.379	43.3234	36.4242	36.7088	0.00640067	0.0582344	0.802358	-0.317683	-1.24633	33.1572	41.3247	-1.44792	-1.0728
ARSG	17	68259182	68422732	+	23.2278	3.8734	2.47783	2.58087	0.506578	0.735775	0.838281	-0.254494	-1.19292	2.66246	3.17609	-1.82047	1.27927
ARSI	5	150296343	150339308	-	122.268	20.8848	12.9754	13.5853	7.22908e-05	0.00252684	0.569759	-0.811575	-1.75513	10.9199	19.1658	-2.19155	-1.40561
ARSJ	4	113900284	113979728	-	177.221	23.7718	19.4933	19.6912	0.274327	0.531969	1.11112	0.152021	1.11112	19.2928	17.3633	-1.07624	1.32872
ARSK	5	95555101	95605103	+	59.3572	8.23409	6.56186	6.59524	0.883746	0.948587	1.01443	0.020665	1.01443	6.42106	6.32974	-1.24835	1.28463
ARSL	X	2934521	2968476	-	458.574	63.5139	50.4141	50.9527	0.0407059	0.181215	1.17136	0.228179	1.17136	58.4387	49.8898	1.00343	1.36738
ARV1	1	230978981	231000734	+	165.968	22.519	18.2495	18.4409	0.00811076	0.0680708	1.23831	0.308368	1.23831	21.7996	17.6043	1.06648	1.43782
ARVCF	22	19969896	20016824	-	32.3432	5.23771	3.50358	3.59368	0.28738	0.544586	0.848257	-0.237427	-1.17889	3.70434	4.367	-1.61085	1.15907
ARX	X	25003694	25016421	-	26.3688	3.66602	2.79121	2.92986	0.656487	0.830447	0.91272	-0.131755	-1.09563	2.92961	3.20976	-1.86231	1.55142
AS3MT	10	102869470	102901900	+	37.4102	5.76629	4.06909	4.15669	0.117237	0.331997	0.784786	-0.349628	-1.27423	3.93256	5.01099	-1.75796	1.08271
ASAH1	8	18055992	18084999	-	663.976	79.0895	73.6666	73.7751	0.293186	0.54898	0.94852	-0.07625	-1.05427	71.4003	75.2755	-1.16789	1.05074
ASAH2	10	50182778	50279721	-	14.0146	2.09844	1.52071	1.55718	0.817275	0.915494	1.06654	0.0929392	1.06654	1.57081	1.47281	-1.54481	1.75724
ASAH2B	10	50739318	50816496	+	85.5384	11.2572	9.42535	9.50426	0.371874	0.624808	1.11835	0.161369	1.11835	9.87512	8.83009	-1.13321	1.41731
ASAP1	8	130052104	130443675	-	1636.97	206.023	181.512	181.885	0.588004	0.790943	0.981571	-0.0268355	-1.01877	172.456	175.694	-1.09456	1.05458
ASAP2	2	9206765	9405684	+	593.249	81.3794	65.0774	65.9165	0.0012308	0.0192192	0.830971	-0.26713	-1.20341	65.3073	78.5915	-1.32914	-1.08958
ASAP3	1	23428563	23484569	-	72.1121	13.084	7.66586	8.01246	0.446404	0.688099	0.917219	-0.124662	-1.09025	6.15549	6.71103	-1.40959	1.18587
ASB1	2	238426742	238452251	+	384.675	52.1007	41.5809	42.7416	0.127481	0.347182	0.922452	-0.116454	-1.08407	47.2067	51.1752	-1.20855	1.02838
ASB13	10	5638867	5666596	-	271.991	32.6862	30.1875	30.2212	0.230151	0.485218	1.06869	0.0958455	1.06869	31.5009	29.4761	-1.04863	1.19764
ASB16-AS1	17	44175968	44186724	-	67.9337	9.52981	7.44664	7.54819	0.13463	0.359497	1.19043	0.251488	1.19043	8.8299	7.41738	-1.06135	1.50408
ASB3	2	53532672	53860161	-	85.654	10.9319	9.45396	9.51711	0.777178	0.89707	1.02984	0.0424148	1.02984	9.70077	9.41972	-1.22622	1.30048
ASB4	7	95478444	95540234	+	11.4129	2.66681	1.13974	1.2681	0.00619268	0.0572116	2.42164	1.27598	2.42164	1.93154	0.797618	1.3332	4.3987
ASB6	9	129634604	129642170	-	266.4	32.6096	29.5081	29.6	0.22368	0.47804	0.926367	-0.110345	-1.07949	29.2452	31.5698	-1.23278	1.05791
ASB7	15	100602589	100651702	+	190.312	22.5908	21.1046	21.1458	0.262643	0.520918	0.929531	-0.105425	-1.07581	20.213	21.7453	-1.23648	1.06835
ASB8	12	48147789	48181214	-	132.456	17.9779	14.6535	14.7173	0.360369	0.615364	0.921173	-0.118456	-1.08557	14.4707	15.709	-1.29461	1.09855
ASB9	X	15235288	15270468	-	125.838	16.0699	13.9393	13.982	0.323166	0.579745	1.08206	0.113777	1.08206	14.9193	13.7879	-1.08961	1.27577
ASCC1	10	72096032	72217135	-	250.538	31.2449	27.5793	27.8376	0.975865	0.990187	1.00232	0.00334802	1.00232	30.2314	30.1613	-1.13851	1.14381
ASCC2	22	29788609	29838305	-	502.65	65.949	55.6442	55.85	0.0241444	0.132947	0.881412	-0.182111	-1.13454	54.0597	61.3331	-1.26292	-1.01921
ASCC3	6	100508194	100881373	-	758.735	101.095	83.8656	84.3038	0.104329	0.311408	0.926203	-0.110599	-1.07968	75.9724	82.0256	-1.18677	1.01807
ASF1A	6	118894152	118909172	+	121.749	15.5263	13.4843	13.5277	0.460492	0.698935	1.06495	0.0907849	1.06495	13.9299	13.0804	-1.12204	1.27253
ASF1B	19	14119512	14136614	-	343.111	47.9908	37.6126	38.1234	0.00385565	0.0422181	1.24433	0.315374	1.24433	45.6322	36.672	1.08321	1.42942
ASGR1	17	7173431	7179565	-	16.3869	4.9286	1.2642	1.82077	0.0817214	0.269792	2.34263	1.22813	2.34263	3.35334	1.43144	-1.07579	5.90389
ASH1L	1	155335268	155562808	-	690.435	86.7987	76.3997	76.715	0.985163	0.99337	1.00614	0.00883074	1.00614	79.7811	79.2942	-1.1288	1.1427
ASH1L-AS1	1	155562042	155563945	+	9.90908	1.77791	1.03797	1.10101	0.327854	0.584044	1.28916	0.366429	1.28916	1.27251	0.987084	-1.49377	2.48253
ASH2L	8	38105493	38144077	+	249.875	29.977	27.7409	27.7639	0.802542	0.908751	0.984184	-0.023	-1.01607	27.4541	27.8953	-1.14459	1.10867
ASIC1	12	50057548	50083612	+	80.598	10.8645	8.84971	8.95534	0.939331	0.973203	0.997038	-0.00427925	-1.00297	9.70217	9.73099	-1.24507	1.23771
ASIC3	7	151048292	151052757	+	43.9789	6.6685	4.83839	4.88655	0.393248	0.642068	1.14675	0.197551	1.14675	5.28332	4.60721	-1.16699	1.53464
ASL	7	66075800	66094698	+	326.285	41.7694	35.9337	36.2539	0.109797	0.320321	0.873062	-0.195845	-1.14539	34.9302	40.0089	-1.37213	1.04588
ASMTL	X	1403139	1453763	-	108.381	14.5985	11.9817	12.0423	0.659939	0.83233	0.959086	-0.0602673	-1.04266	12.3838	12.9121	-1.24646	1.14655
ASNS	7	97851677	97872543	-	765.552	95.7364	84.8602	85.0613	0.423138	0.667703	1.03219	0.0457125	1.03219	82.5558	79.981	-1.05249	1.12135
ASNSD1	2	189661385	189670832	+	271.072	34.8339	30.0172	30.1191	0.350371	0.606209	1.05923	0.0830191	1.05923	32.2599	30.4559	-1.06979	1.20027
ASPH	8	61500556	61714641	-	11461.2	1359.84	1271.23	1273.47	0.0148181	0.0989829	0.899482	-0.152834	-1.11175	1196.09	1329.75	-1.20804	-1.02314
ASPHD1	16	29900375	29919865	+	180.538	23.6065	19.9706	20.0598	0.33486	0.590402	0.924349	-0.113491	-1.08184	19.7134	21.3268	-1.27715	1.09123
ASPM	1	197084127	197146695	-	1270.03	168.241	139.773	141.115	0.000114214	0.00343426	1.3209	0.401517	1.3209	155.866	118	1.17841	1.48061
ASPSCR1	17	81976807	82017407	+	250.153	29.7346	27.7511	27.7947	0.463286	0.70199	1.04346	0.0613739	1.04346	28.9249	27.7202	-1.08384	1.18009
ASRGL1	11	62337448	62393413	+	172.599	20.6882	19.1198	19.1777	0.948048	0.977636	1.0051	0.00733806	1.0051	19.6421	19.5424	-1.16533	1.17724
ASS1	9	130444961	130501275	+	27.399	3.45469	3.03067	3.04434	0.733975	0.873822	0.941793	-0.0865188	-1.0618	2.93605	3.11752	-1.45941	1.29446
ASTE1	3	131013875	131027650	-	26.3016	4.41257	2.82555	2.9224	0.612168	0.806752	1.18828	0.248872	1.18828	3.02041	2.54184	-1.31751	1.86033
ASTN2	9	116425225	117415071	-	55.4109	7.12272	6.13101	6.15677	0.521525	0.746204	0.925708	-0.111371	-1.08025	5.96341	6.44199	-1.37225	1.17593
ASXL1	20	32358330	32439320	+	840.953	101.928	93.3474	93.4392	0.104572	0.311741	1.07205	0.100369	1.07205	97.3808	90.8363	-1.01593	1.16759
ASXL2	2	25733753	25878488	-	851.44	101.409	94.3405	94.6044	0.8165	0.914978	0.990708	-0.0134686	-1.00938	98.6584	99.5837	-1.09684	1.07655
ATAD1	10	87751512	87841344	-	407.635	52.51	45.1499	45.2928	0.896478	0.955058	0.992852	-0.0103494	-1.0072	43.5478	43.8613	-1.139	1.12277
ATAD2	8	123319850	123416351	-	767.776	104.727	84.4245	85.3085	0.00579399	0.0550142	1.25511	0.327811	1.25511	98.4016	78.4009	1.07683	1.46291
ATAD2B	2	23748664	23927124	-	164.796	24.3781	18.0154	18.3106	0.199596	0.450423	1.12993	0.176228	1.12993	21.1076	18.6806	-1.08755	1.38851
ATAD3A	1	1512162	1534686	+	672.986	82.7149	74.6699	74.7762	0.442144	0.684539	1.03817	0.0540471	1.03817	76.1735	73.3727	-1.06829	1.15141
ATAD3B	1	1471765	1497849	+	61.7615	7.82155	6.78492	6.86239	0.27775	0.535735	1.14483	0.195129	1.14483	7.50322	6.55402	-1.14989	1.50708
ATAD5	17	30831966	30895870	+	174.461	22.8718	19.2896	19.3846	0.447306	0.688672	1.07494	0.104253	1.07494	19.8767	18.491	-1.11091	1.28364
ATAT1	6	30626842	30646824	+	45.7898	6.05295	4.99516	5.08775	0.556061	0.771395	1.092	0.126979	1.092	5.60511	5.13286	-1.27581	1.52137
ATE1	10	121740421	121928802	-	435.779	58.8533	48.0939	48.4199	0.709501	0.858943	1.03752	0.0531357	1.03752	51.1772	49.3265	-1.13634	1.2232
ATF1	12	50763710	50821163	+	123.77	15.4617	13.6946	13.7522	0.0664476	0.239785	1.1623	0.21698	1.1623	14.3874	12.3784	-1.01323	1.36881
ATF2	2	175072250	175168383	-	315.778	41.1956	34.9177	35.0864	0.975165	0.989934	1.00235	0.00338746	1.00235	36.1065	36.0218	-1.16625	1.17174
ATF4	22	39519695	39522686	+	2232.25	313.283	246.062	248.028	0.00591594	0.0557666	1.18263	0.241993	1.18263	284.026	240.166	1.05813	1.32177
ATF5	19	49928702	49933936	+	862.173	111.435	95.5309	95.797	0.312459	0.567579	0.943142	-0.0844531	-1.06029	93.9237	99.5859	-1.19401	1.06209
ATF6	1	161766320	161964071	+	345.819	46.345	38.2253	38.4243	0.154365	0.388576	0.895192	-0.159731	-1.11708	37.0991	41.4426	-1.29902	1.041
ATF6B	6	32115264	32128254	-	405.831	53.8417	44.9368	45.0924	0.00799693	0.0674994	1.1588	0.212633	1.1588	49.9102	43.0706	1.04677	1.28282
ATF7	12	53507856	53626411	-	326.695	40.5474	36.1886	36.2994	0.80606	0.910795	0.985362	-0.0212736	-1.01486	37.2567	37.8102	-1.15226	1.11878
ATF7IP	12	14365632	14502936	+	290.826	37.5072	32.1804	32.314	0.487501	0.721049	0.952788	-0.0697727	-1.04955	31.7158	33.2874	-1.22707	1.11394
ATF7IP2	16	10326434	10483639	+	28.0559	4.06545	3.06491	3.11732	0.450355	0.691366	0.865933	-0.207672	-1.15482	2.94024	3.39545	-1.68021	1.25989
ATG10	5	81972023	82276858	+	82.995	11.5582	9.15848	9.22167	0.833861	0.92405	0.972164	-0.0407282	-1.02863	9.41991	9.68963	-1.28688	1.21623
ATG101	12	52069246	52077495	+	516.1	65.4827	57.1826	57.3444	0.00262303	0.0325854	1.17683	0.234904	1.17683	62.0417	52.7194	1.06968	1.29471
ATG12	5	115828200	115841838	-	309.368	36.8244	34.3269	34.3742	0.706194	0.857509	0.980171	-0.0288947	-1.02023	34.8547	35.5598	-1.13992	1.09517
ATG13	11	46617527	46674819	+	554.769	68.471	61.5381	61.641	0.57817	0.784471	0.971426	-0.0418241	-1.02941	60.8924	62.6835	-1.15069	1.08587
ATG14	14	55366391	55411831	-	140.869	17.358	15.5879	15.6521	0.416123	0.661651	0.93279	-0.100376	-1.07205	14.8842	15.9567	-1.28021	1.11391
[truncated: 12,367 more rows]
