# Supplementary material for: Overexpression screen of interferon-stimulated genes identifies RARRES3 as a restrictor of Toxoplasma gondii infection
Source: eLife. 2021 Dec 6;10:e73137. doi: 10.7554/eLife.73137 (PMC8789288; doi:10.7554/eLife.73137)
Supplement: Figure 3—source data 3. [file elife-73137-fig3-data3.xlsx]

## Sheet: Sheet1
GO biological process complete	Total number	Number present	Number expected	Fold Enrichment	Increased (+) or decrease (-) enrichment	P value
antigen processing and presentation of endogenous peptide antigen via MHC class I	17	13	0.32	40.28	+	2.19e-11
antigen processing and presentation of endogenous peptide antigen via MHC class I via ER pathway, TAP-independent	8	6	0.15	39.5	+	0.000968
antigen processing and presentation of endogenous peptide antigen via MHC class I via ER pathway	8	6	0.15	39.5	+	0.000968
antigen processing and presentation of peptide antigen via MHC class Ib	7	5	0.13	37.62	+	0.0141
interleukin-27-mediated signaling pathway	7	5	0.13	37.62	+	0.0141
antigen processing and presentation of endogenous peptide antigen	19	13	0.36	36.04	+	6.13e-11
antigen processing and presentation of endogenous antigen	26	14	0.49	28.36	+	6.55e-11
antigen processing and presentation of peptide antigen via MHC class I	28	15	0.53	28.22	+	7.43e-12
type I interferon signaling pathway	20	10	0.38	26.34	+	8.81e-07
cellular response to type I interferon	22	11	0.42	26.34	+	9.95e-08
response to type I interferon	30	14	0.57	24.58	+	3.03e-10
negative regulation of type I interferon-mediated signaling pathway	19	8	0.36	22.18	+	0.0002
response to interferon-alpha	24	10	0.46	21.95	+	3.6e-06
regulation of apoptotic cell clearance	10	4	0.19	21.07	+	0.000102
positive regulation of apoptotic cell clearance	8	3	0.15	19.75	+	0.000948
protein poly-ADP-ribosylation	8	3	0.15	19.75	+	0.000948
antigen processing and presentation of exogenous peptide antigen via MHC class I	8	3	0.15	19.75	+	0.000948
necroptotic signaling pathway	8	3	0.15	19.75	+	0.000948
negative regulation of viral genome replication	56	19	1.06	17.87	+	8.87e-13
negative regulation of viral genome replication	56	19	1.06	17.87	+	9.76e-17
negative regulation of natural killer cell mediated cytotoxicity	18	6	0.34	17.56	+	0.0371
response to interferon-beta	33	11	0.63	17.56	+	3.28e-06
positive regulation of viral entry into host cell	12	4	0.23	17.56	+	0.000181
positive regulation by symbiont of entry into host	12	4	0.23	17.56	+	0.000181
response to interferon-beta	33	11	0.63	17.56	+	3.61e-10
negative regulation of natural killer cell mediated immunity	19	6	0.36	16.63	+	0.048
negative regulation of viral transcription	16	5	0.3	16.46	+	3.48e-05
negative regulation of viral process	96	29	1.82	15.91	+	9.35e-20
negative regulation of viral process	96	29	1.82	15.91	+	1.03e-23
antigen processing and presentation of peptide antigen	60	18	1.14	15.8	+	3.45e-11
negative regulation of viral life cycle	27	8	0.51	15.61	+	0.00186
negative regulation of viral life cycle	27	8	0.51	15.61	+	2.05e-07
regulation of viral entry into host cell	44	12	0.84	14.37	+	3.59e-06
regulation of viral entry into host cell	44	12	0.84	14.37	+	3.95e-10
negative regulation of innate immune response	70	19	1.33	14.3	+	2.76e-11
antiviral innate immune response	15	4	0.28	14.05	+	0.000368
regulation of CD8-positive, alpha-beta T cell activation	19	5	0.36	13.86	+	6.95e-05
cellular response to exogenous dsRNA	19	5	0.36	13.86	+	6.95e-05
negative regulation of viral entry into host cell	23	6	0.44	13.74	+	1.33e-05
regulation of type I interferon-mediated signaling pathway	35	9	0.66	13.54	+	0.000894
regulation of viral transcription	20	5	0.38	13.17	+	8.55e-05
defense response to protozoan	24	6	0.46	13.17	+	1.64e-05
cellular response to interferon-beta	24	6	0.46	13.17	+	1.64e-05
positive regulation of nitric-oxide synthase biosynthetic process	16	4	0.3	13.17	+	0.000454
receptor signaling pathway via JAK-STAT	41	10	0.78	12.85	+	0.000264
receptor signaling pathway via JAK-STAT	41	10	0.78	12.85	+	2.91e-08
response to protozoan	25	6	0.47	12.64	+	2e-05
receptor signaling pathway via STAT	42	10	0.8	12.54	+	0.000322
receptor signaling pathway via STAT	42	10	0.8	12.54	+	3.54e-08
antigen processing and presentation of exogenous peptide antigen	38	9	0.72	12.48	+	0.00164
regulation of viral genome replication	85	20	1.61	12.39	+	5.29e-11
modulation by symbiont of entry into host	51	12	0.97	12.39	+	1.52e-05
regulation of viral genome replication	85	20	1.61	12.39	+	5.82e-15
modulation by symbiont of entry into host	51	12	0.97	12.39	+	1.68e-09
regulation of interferon-gamma-mediated signaling pathway	17	4	0.32	12.39	+	0.000552
regulation of response to interferon-gamma	17	4	0.32	12.39	+	0.000552
antigen processing and presentation	94	22	1.78	12.33	+	2.5e-12
defense response to virus	214	48	4.06	11.81	+	1.34e-29
defense response to symbiont	214	48	4.06	11.81	+	1.34e-29
regulation of viral life cycle	148	33	2.81	11.74	+	2.64e-19
regulation of viral life cycle	148	33	2.81	11.74	+	2.9e-23
positive regulation of interferon-beta production	41	9	0.78	11.56	+	0.00286
positive regulation of interferon-beta production	41	9	0.78	11.56	+	3.15e-07
cellular response to dsRNA	23	5	0.44	11.45	+	0.000151
response to interferon-gamma	130	28	2.47	11.34	+	1.33e-15
antigen processing and presentation of exogenous antigen	47	10	0.89	11.21	+	0.000809
regulation of viral process	166	35	3.15	11.11	+	5.96e-20
regulation of viral process	166	35	3.15	11.11	+	6.56e-24
toll-like receptor 4 signaling pathway	19	4	0.36	11.09	+	0.000794
regulation of chemokine (C-X-C motif) ligand 2 production	19	4	0.36	11.09	+	0.000794
positive regulation of interferon-alpha production	24	5	0.46	10.97	+	0.00018
positive regulation of T cell mediated cytotoxicity	29	6	0.55	10.9	+	4.14e-05
necroptotic process	20	4	0.38	10.53	+	0.000938
regulation of nitric-oxide synthase biosynthetic process	20	4	0.38	10.53	+	0.000938
regulation of interferon-alpha production	30	6	0.57	10.53	+	4.89e-05
regulation of monocyte differentiation	20	4	0.38	10.53	+	0.000938
positive regulation of type I interferon production	59	11	1.12	9.82	+	0.0006
positive regulation of type I interferon production	59	11	1.12	9.82	+	6.6e-08
regulation of T cell mediated cytotoxicity	39	7	0.74	9.45	+	2.11e-05
negative regulation of response to biotic stimulus	106	19	2.01	9.44	+	1.78e-08
positive regulation of defense response to virus by host	34	6	0.65	9.3	+	9.04e-05
regulation of interferon-beta production	57	10	1.08	9.24	+	0.00394
regulation of interferon-beta production	57	10	1.08	9.24	+	4.33e-07
T cell mediated immunity	29	5	0.55	9.08	+	0.00039
cellular response to interferon-gamma	106	18	2.01	8.94	+	1.53e-07
regulation of biological process involved in symbiotic interaction	77	13	1.46	8.89	+	0.000109
regulation of biological process involved in symbiotic interaction	77	13	1.46	8.89	+	1.2e-08
response to virus	316	53	6	8.83	+	1.64e-27
positive regulation of extrinsic apoptotic signaling pathway	48	8	0.91	8.78	+	8.79e-06
antigen processing and presentation of exogenous peptide antigen via MHC class II	30	5	0.57	8.78	+	0.000448
cellular response to virus	56	9	1.06	8.47	+	0.0285
regulation of type I interferon production	94	15	1.78	8.41	+	1.63e-05
regulation of type I interferon production	94	15	1.78	8.41	+	1.79e-09
regulation of defense response to virus by host	44	7	0.84	8.38	+	4.22e-05
pattern recognition receptor signaling pathway	82	13	1.56	8.35	+	0.000213
positive regulation of response to cytokine stimulus	57	9	1.08	8.32	+	0.0325
positive regulation of response to cytokine stimulus	57	9	1.08	8.32	+	3.58e-06
antigen processing and presentation of peptide antigen via MHC class II	32	5	0.61	8.23	+	0.000584
antigen processing and presentation of peptide or polysaccharide antigen via MHC class II	34	5	0.65	7.75	+	0.000748
positive regulation of cytokine-mediated signaling pathway	50	7	0.95	7.37	+	8.76e-05
regulation of natural killer cell activation	36	5	0.68	7.32	+	0.000945
positive regulation of cytokine production involved in immune response	67	9	1.27	7.08	+	1.17e-05
macrophage activation	54	7	1.03	6.83	+	0.000136
regulation of response to cytokine stimulus	147	19	2.79	6.81	+	2.82e-06
regulation of interleukin-12 production	62	8	1.18	6.8	+	4.66e-05
regulation of innate immune response	214	27	4.06	6.65	+	8.14e-10
regulation of cytokine-mediated signaling pathway	136	17	2.58	6.58	+	3.87e-05
positive regulation of T cell mediated immunity	56	7	1.06	6.58	+	0.000167
zymogen activation	48	6	0.91	6.58	+	0.000489
toll-like receptor signaling pathway	57	7	1.08	6.47	+	0.000184
positive regulation of tumor necrosis factor production	98	12	1.86	6.45	+	0.00915
regulation of cytokine production involved in immune response	98	12	1.86	6.45	+	0.00915
regulation of cytokine production involved in immune response	98	12	1.86	6.45	+	1.01e-06
positive regulation of tumor necrosis factor production	98	12	1.86	6.45	+	1.01e-06
positive regulation of interferon-gamma production	74	9	1.4	6.41	+	2.4e-05
regulation of response to biotic stimulus	327	39	6.21	6.28	+	1.14e-14
regulation of phagocytosis	93	11	1.77	6.23	+	0.0351
regulation of phagocytosis	93	11	1.77	6.23	+	3.86e-06
positive regulation of tumor necrosis factor superfamily cytokine production	102	12	1.94	6.2	+	0.0134
positive regulation of tumor necrosis factor superfamily cytokine production	102	12	1.94	6.2	+	1.48e-06
innate immune response	783	92	14.87	6.19	+	2.11e-39
positive regulation of interleukin-1 beta production	60	7	1.14	6.15	+	0.000246
positive regulation of NIK/NF-kappaB signaling	69	8	1.31	6.11	+	9.27e-05
regulation of defense response to virus	71	8	1.35	5.93	+	0.000111
alpha-beta T cell activation	72	8	1.37	5.85	+	0.000122
negative regulation of immune response	190	21	3.61	5.82	+	4.49e-06
positive regulation of phagocytosis	64	7	1.22	5.76	+	0.000352
response to dsRNA	55	6	1.04	5.75	+	0.000942
positive regulation of leukocyte mediated cytotoxicity	56	6	1.06	5.64	+	0.00103
defense response to other organism	989	105	18.78	5.59	+	3.74e-42
regulation of T cell mediated immunity	85	9	1.61	5.58	+	6.5e-05
negative regulation of defense response	222	23	4.21	5.46	+	2.14e-06
positive regulation of NF-kappaB transcription factor activity	155	16	2.94	5.44	+	0.00126
positive regulation of NF-kappaB transcription factor activity	155	16	2.94	5.44	+	1.39e-07
positive regulation of I-kappaB kinase/NF-kappaB signaling	187	19	3.55	5.35	+	0.000107
positive regulation of I-kappaB kinase/NF-kappaB signaling	187	19	3.55	5.35	+	1.18e-08
cytokine-mediated signaling pathway	353	35	6.7	5.22	+	1.23e-10
regulation of interferon-gamma production	113	11	2.15	5.13	+	2.1e-05
positive regulation of interleukin-1 production	72	7	1.37	5.12	+	0.000677
regulation of interleukin-1 beta production	94	9	1.78	5.04	+	0.000132
response to cytokine	807	76	15.32	4.96	+	9.81e-26
positive regulation of adaptive immune response based on somatic recombination of immune receptors built from immunoglobulin superfamily domains	107	10	2.03	4.92	+	6.83e-05
regulation of tumor necrosis factor superfamily cytokine production	164	15	3.11	4.82	+	0.0128
regulation of tumor necrosis factor superfamily cytokine production	164	15	3.11	4.82	+	1.41e-06
regulation of interleukin-1 production	111	10	2.11	4.75	+	9.07e-05
regulation of NIK/NF-kappaB signaling	100	9	1.9	4.74	+	0.000204
response to other organism	1371	123	26.03	4.73	+	1.61e-43
response to external biotic stimulus	1372	123	26.05	4.72	+	1.73e-43
myeloid leukocyte activation	134	12	2.54	4.72	+	1.93e-05
regulation of I-kappaB kinase/NF-kappaB signaling	246	22	4.67	4.71	+	6.53e-05
regulation of I-kappaB kinase/NF-kappaB signaling	246	22	4.67	4.71	+	7.18e-09
positive regulation of adaptive immune response	112	10	2.13	4.7	+	9.72e-05
regulation of tumor necrosis factor production	159	14	3.02	4.64	+	0.0431
regulation of tumor necrosis factor production	159	14	3.02	4.64	+	4.74e-06
defense response	1387	122	26.33	4.63	+	3e-42
regulation of adaptive immune response	183	16	3.47	4.61	+	0.0099
regulation of adaptive immune response	183	16	3.47	4.61	+	1.09e-06
response to biotic stimulus	1417	123	26.9	4.57	+	4.19e-42
regulation of alpha-beta T cell activation	104	9	1.97	4.56	+	0.000268
regulation of defense response	581	50	11.03	4.53	+	4.14e-14
regulation of extrinsic apoptotic signaling pathway	151	13	2.87	4.53	+	1.29e-05
cellular response to cytokine stimulus	702	60	13.33	4.5	+	1.75e-17
regulation of production of molecular mediator of immune response	166	14	3.15	4.44	+	7.51e-06
positive regulation of production of molecular mediator of immune response	119	10	2.26	4.43	+	0.000155
positive regulation of DNA-binding transcription factor activity	263	22	4.99	4.41	+	0.0002
positive regulation of DNA-binding transcription factor activity	263	22	4.99	4.41	+	2.2e-08
immune response	1677	140	31.84	4.4	+	1.89e-47
cellular response to lipopolysaccharide	182	15	3.46	4.34	+	0.042
cellular response to lipopolysaccharide	182	15	3.46	4.34	+	4.62e-06
positive regulation of apoptotic signaling pathway	122	10	2.32	4.32	+	0.000187
positive regulation of cytokine production	464	38	8.81	4.31	+	2.28e-09
positive regulation of cytokine production	464	38	8.81	4.31	+	2.5e-13
biological process involved in interspecies interaction between organisms	1520	124	28.86	4.3	+	7.37e-40
negative regulation of immune system process	418	34	7.94	4.28	+	5.24e-08
response to tumor necrosis factor	210	17	3.99	4.26	+	0.0123
response to tumor necrosis factor	210	17	3.99	4.26	+	1.35e-06
positive regulation of lymphocyte mediated immunity	112	9	2.13	4.23	+	0.000445
cell killing	125	10	2.37	4.21	+	0.000224
myeloid leukocyte differentiation	114	9	2.16	4.16	+	0.000502
cellular response to molecule of bacterial origin	192	15	3.65	4.12	+	8.43e-06
regulation of adaptive immune response based on somatic recombination of immune receptors built from immunoglobulin superfamily domains	168	13	3.19	4.08	+	3.68e-05
response to interleukin-1	129	10	2.45	4.08	+	0.000284
regulation of immune response	905	69	17.18	4.02	+	4.52e-18
positive regulation of inflammatory response	132	10	2.51	3.99	+	0.000337
regulation of leukocyte mediated immunity	226	17	4.29	3.96	+	0.0311
positive regulation of leukocyte mediated immunity	134	10	2.54	3.93	+	0.000377
adaptive immune response based on somatic recombination of immune receptors built from immunoglobulin superfamily domains	245	18	4.65	3.87	+	0.022
adaptive immune response based on somatic recombination of immune receptors built from immunoglobulin superfamily domains	245	18	4.65	3.87	+	2.42e-06
response to lipopolysaccharide	319	23	6.06	3.8	+	0.0012
response to lipopolysaccharide	319	23	6.06	3.8	+	1.32e-07
negative regulation of response to external stimulus	376	27	7.14	3.78	+	0.000103
positive regulation of response to biotic stimulus	167	12	3.17	3.78	+	0.000141
regulation of cytokine production	715	51	13.57	3.76	+	2.47e-11
positive regulation of innate immune response	127	9	2.41	3.73	+	0.00103
cellular response to biotic stimulus	217	15	4.12	3.64	+	3.24e-05
response to molecule of bacterial origin	336	23	6.38	3.61	+	0.00285
response to molecule of bacterial origin	336	23	6.38	3.61	+	3.13e-07
lymphocyte mediated immunity	235	16	4.46	3.59	+	2.12e-05
regulation of immune effector process	339	23	6.44	3.57	+	0.0033
protein processing	177	12	3.36	3.57	+	0.000233
positive regulation of endopeptidase activity	178	12	3.38	3.55	+	0.000245
immune system process	2368	158	44.96	3.51	+	5.44e-43
positive regulation of leukocyte proliferation	150	10	2.85	3.51	+	0.00086
regulation of response to external stimulus	908	60	17.24	3.48	+	1.79e-12
cellular response to tumor necrosis factor	182	12	3.46	3.47	+	0.000297
T cell activation	244	16	4.63	3.45	+	3.26e-05
positive regulation of immune effector process	234	15	4.44	3.38	+	7.27e-05
positive regulation of defense response	265	17	5.03	3.38	+	2.41e-05
positive regulation of peptidase activity	195	12	3.7	3.24	+	0.000532
regulation of myeloid cell differentiation	196	12	3.72	3.22	+	0.000556
positive regulation of immune response	562	34	10.67	3.19	+	7.59e-05
positive regulation of immune response	562	34	10.67	3.19	+	8.35e-09
immune effector process	434	26	8.24	3.16	+	0.00545
immune effector process	434	26	8.24	3.16	+	6e-07
positive regulation of T cell activation	217	13	4.12	3.16	+	0.000403
response to bacterium	721	43	13.69	3.14	+	1.07e-06
response to bacterium	721	43	13.69	3.14	+	1.18e-10
humoral immune response	337	20	6.4	3.13	+	1.38e-05
regulation of immune system process	1420	84	26.96	3.12	+	3.76e-16
response to external stimulus	2405	142	45.66	3.11	+	1.06e-31
regulation of DNA-binding transcription factor activity	424	25	8.05	3.11	+	0.0118
regulation of DNA-binding transcription factor activity	424	25	8.05	3.11	+	1.3e-06
positive regulation of leukocyte cell-cell adhesion	239	14	4.54	3.09	+	0.000303
regulation of inflammatory response	343	20	6.51	3.07	+	1.75e-05
myeloid cell differentiation	224	13	4.25	3.06	+	0.000535
inflammatory response	502	29	9.53	3.04	+	0.00247
leukocyte activation	502	29	9.53	3.04	+	0.00247
leukocyte activation	502	29	9.53	3.04	+	2.72e-07
inflammatory response	502	29	9.53	3.04	+	2.72e-07
regulation of apoptotic signaling pathway	348	20	6.61	3.03	+	2.13e-05
regulation of leukocyte differentiation	279	16	5.3	3.02	+	0.000144
leukocyte mediated immunity	281	16	5.33	3	+	0.000156
regulation of angiogenesis	282	16	5.35	2.99	+	0.000162
regulation of hemopoiesis	353	20	6.7	2.98	+	2.59e-05
adaptive immune response	640	36	12.15	2.96	+	0.000161
adaptive immune response	640	36	12.15	2.96	+	1.77e-08
positive regulation of cell-cell adhesion	285	16	5.41	2.96	+	0.000181
regulation of vasculature development	286	16	5.43	2.95	+	0.000188
positive regulation of response to external stimulus	417	23	7.92	2.91	+	9.75e-06
positive regulation of immune system process	898	49	17.05	2.87	+	9.2e-07
positive regulation of immune system process	898	49	17.05	2.87	+	1.01e-10
regulation of endopeptidase activity	424	23	8.05	2.86	+	1.26e-05
cellular response to external stimulus	313	17	5.94	2.86	+	0.000167
regulation of response to stress	1241	67	23.56	2.84	+	3.08e-10
negative regulation of cell adhesion	285	15	5.41	2.77	+	0.000545
regulation of leukocyte cell-cell adhesion	327	17	6.21	2.74	+	0.000272
cell activation	622	32	11.81	2.71	+	0.00677
regulation of T cell activation	331	17	6.28	2.71	+	0.000311
cell activation	622	32	11.81	2.71	+	7.45e-07
mononuclear cell differentiation	293	15	5.56	2.7	+	0.000715
regulation of peptidase activity	452	23	8.58	2.68	+	3.27e-05
defense response to bacterium	350	17	6.64	2.56	+	0.00057
leukocyte differentiation	353	17	6.7	2.54	+	0.000625
lymphocyte activation	397	19	7.54	2.52	+	0.000328
regulation of cell-cell adhesion	441	21	8.37	2.51	+	0.000173
positive regulation of apoptotic process	509	24	9.66	2.48	+	0.000108
response to stress	3337	153	63.35	2.42	+	6.48e-23
positive regulation of programmed cell death	524	24	9.95	2.41	+	0.000136
proteolysis involved in cellular protein catabolic process	598	26	11.35	2.29	+	0.00013
proteolysis	1213	52	23.03	2.26	+	0.000692
proteolysis	1213	52	23.03	2.26	+	7.61e-08
cellular response to organic substance	1978	84	37.55	2.24	+	5.8e-08
positive regulation of gene expression	1127	48	21.4	2.24	+	0.00288
positive regulation of gene expression	1127	48	21.4	2.24	+	3.17e-07
positive regulation of cell death	587	25	11.14	2.24	+	0.000335
protein ubiquitination	661	28	12.55	2.23	+	0.000132
cellular protein catabolic process	625	26	11.87	2.19	+	0.000295
protein catabolic process	681	28	12.93	2.17	+	0.000187
protein modification by small protein conjugation	710	29	13.48	2.15	+	0.00023
response to organic substance	2686	109	50.99	2.14	+	1.36e-10
immune system development	665	27	12.63	2.14	+	0.000291
positive regulation of multicellular organismal process	1413	56	26.83	2.09	+	0.00303
positive regulation of multicellular organismal process	1413	56	26.83	2.09	+	3.33e-07
regulation of cell adhesion	737	29	13.99	2.07	+	0.000316
positive regulation of response to stimulus	2081	81	39.51	2.05	+	6.74e-06
cell death	977	38	18.55	2.05	+	4.19e-05
positive regulation of response to stimulus	2081	81	39.51	2.05	+	7.41e-10
programmed cell death	941	36	17.87	2.02	+	0.000131
cellular macromolecule catabolic process	814	31	15.45	2.01	+	0.000361
regulation of proteolysis	738	28	14.01	2	+	0.000872
organonitrogen compound catabolic process	1028	39	19.52	2	+	6.06e-05
positive regulation of intracellular signal transduction	961	36	18.24	1.97	+	0.000158
response to lipid	828	31	15.72	1.97	+	0.000434
negative regulation of response to stimulus	1553	57	29.48	1.93	+	0.0266
protein modification by small protein conjugation or removal	849	31	16.12	1.92	+	0.000769
macromolecule catabolic process	908	33	17.24	1.91	+	0.000482
cellular response to chemical stimulus	2555	90	48.51	1.86	+	7.7e-05
negative regulation of multicellular organismal process	991	35	18.81	1.86	+	0.000536
regulation of multicellular organismal development	1296	45	24.6	1.83	+	0.000142
cell surface receptor signaling pathway	2029	70	38.52	1.82	+	0.013
positive regulation of signal transduction	1461	50	27.74	1.8	+	6.83e-05
cellular catabolic process	1615	54	30.66	1.76	+	6.42e-05
regulation of apoptotic process	1426	47	27.07	1.74	+	0.000288
positive regulation of cell communication	1633	54	31	1.74	+	0.0001
regulation of response to stimulus	3795	125	72.05	1.73	+	1.81e-06
regulation of multicellular organismal process	2582	85	49.02	1.73	+	0.00452
positive regulation of signaling	1640	54	31.14	1.73	+	0.000105
catabolic process	1885	62	35.79	1.73	+	2.96e-05
regulation of cell death	1593	52	30.24	1.72	+	0.000184
regulation of programmed cell death	1456	47	27.64	1.7	+	0.000477
organic substance catabolic process	1585	51	30.09	1.69	+	0.00027
positive regulation of molecular function	1507	48	28.61	1.68	+	0.000581
regulation of cell population proliferation	1654	51	31.4	1.62	+	0.000723
positive regulation of macromolecule metabolic process	3384	101	64.25	1.57	+	0.0249
positive regulation of macromolecule metabolic process	3384	101	64.25	1.57	+	2.74e-06
response to chemical	4052	120	76.93	1.56	+	0.0032
negative regulation of macromolecule metabolic process	2738	81	51.98	1.56	+	6.48e-05
negative regulation of biological process	5180	152	98.34	1.55	+	3.1e-05
positive regulation of metabolic process	3678	107	69.83	1.53	+	0.0373
positive regulation of metabolic process	3678	107	69.83	1.53	+	4.1e-06
negative regulation of metabolic process	2951	85	56.03	1.52	+	0.000109
regulation of localization	2711	77	51.47	1.5	+	0.000379
positive regulation of biological process	6064	172	115.13	1.49	+	1.56e-05
positive regulation of biological process	6064	172	115.13	1.49	+	1.72e-09
response to stimulus	8034	225	152.53	1.48	+	2.77e-09
positive regulation of cellular process	5584	146	106.01	1.38	+	1.25e-05
regulation of biological process	11522	269	218.75	1.23	+	0.00279
biological regulation	12242	285	232.42	1.23	+	0.00047
Unclassified	2906	24	55.17	0.44	-	0
Unclassified	2906	24	55.17	0.44	-	9.69e-07
sensory perception	978	5	18.57	0.27	-	0.000382
