# Supplementary material for: Overexpression screen of interferon-stimulated genes identifies RARRES3 as a restrictor of Toxoplasma gondii infection
Source: eLife. 2021 Dec 6;10:e73137. doi: 10.7554/eLife.73137 (PMC8789288; doi:10.7554/eLife.73137)
Supplement: Figure 3—source data 4. [file elife-73137-fig3-data4.xlsx]

## Sheet: Sheet1
GO biological process complete	Total number	Number present	Number expected	Fold Enrichment	Increased (+) or decrease (-) enrichment	P value
ISG15-protein conjugation	6	4	0.05	88.01	+	0.00566
antigen processing and presentation of endogenous peptide antigen via MHC class I	17	11	0.13	85.42	+	5.3e-13
antigen processing and presentation of endogenous peptide antigen via MHC class I via ER pathway, TAP-independent	8	5	0.06	82.51	+	0.000251
antigen processing and presentation of endogenous peptide antigen via MHC class I via ER pathway	8	5	0.06	82.51	+	0.000251
antigen processing and presentation of endogenous peptide antigen	19	11	0.14	76.43	+	1.33e-12
antigen processing and presentation of peptide antigen via MHC class Ib	7	4	0.05	75.44	+	0.00885
interleukin-27-mediated signaling pathway	7	4	0.05	75.44	+	0.00885
antigen processing and presentation of peptide antigen via MHC class I	28	13	0.21	61.29	+	1.97e-14
antigen processing and presentation of endogenous antigen	26	12	0.2	60.93	+	4.41e-13
regulation of ribonuclease activity	9	4	0.07	58.68	+	0.0189
cytoplasmic pattern recognition receptor signaling pathway in response to virus	10	4	0.08	52.81	+	0.0264
protein mono-ADP-ribosylation	12	4	0.09	44.01	+	0.0474
positive regulation of viral entry into host cell	12	4	0.09	44.01	+	0.0474
positive regulation by symbiont of entry into host	12	4	0.09	44.01	+	0.0474
response to type I interferon	30	10	0.23	44.01	+	2.74e-09
cellular response to type I interferon	22	7	0.17	42.01	+	1.46e-05
negative regulation of type I interferon-mediated signaling pathway	19	6	0.14	41.69	+	0.000234
negative regulation of viral transcription	16	5	0.12	41.26	+	0.00378
negative regulation of viral genome replication	56	17	0.42	40.08	+	3.59e-17
type I interferon signaling pathway	20	6	0.15	39.61	+	0.000303
negative regulation of natural killer cell mediated cytotoxicity	18	5	0.14	36.67	+	0.00617
negative regulation of natural killer cell mediated immunity	19	5	0.14	34.74	+	0.00775
cellular response to exogenous dsRNA	19	5	0.14	34.74	+	0.00775
antigen processing and presentation of peptide antigen	60	15	0.45	33	+	9.8e-14
negative regulation of viral process	96	24	0.73	33	+	9.13e-24
regulation of viral transcription	20	5	0.15	33	+	0.00963
response to interferon-alpha	24	6	0.18	33	+	0.000762
response to interferon-beta	33	8	0.25	32	+	5.99e-06
regulation of viral entry into host cell	44	10	0.33	30	+	7.06e-08
positive regulation of interferon-beta production	41	9	0.31	28.98	+	1.06e-06
cellular response to dsRNA	23	5	0.17	28.7	+	0.0175
negative regulation of innate immune response	70	15	0.53	28.29	+	7.25e-13
negative regulation of leukocyte mediated cytotoxicity	24	5	0.18	27.5	+	0.021
regulation of type I interferon-mediated signaling pathway	35	7	0.27	26.4	+	0.000233
regulation of viral genome replication	85	17	0.64	26.4	+	1.62e-14
modulation by symbiont of entry into host	51	10	0.39	25.89	+	2.54e-07
regulation of viral life cycle	148	28	1.12	24.98	+	2.49e-25
negative regulation of viral life cycle	27	5	0.2	24.45	+	0.035
antigen processing and presentation of exogenous peptide antigen	38	7	0.29	24.32	+	0.000385
antigen processing and presentation	94	17	0.71	23.88	+	7.27e-14
negative regulation of cell killing	28	5	0.21	23.57	+	0.041
regulation of interferon-beta production	57	10	0.43	23.16	+	6.73e-07
regulation of viral process	166	29	1.26	23.06	+	1.78e-25
defense response to virus	214	37	1.62	22.83	+	1.91e-33
defense response to symbiont	214	37	1.62	22.83	+	1.91e-33
positive regulation of T cell mediated cytotoxicity	29	5	0.22	22.76	+	0.0478
antigen processing and presentation of exogenous antigen	47	8	0.36	22.47	+	6.99e-05
regulation of T cell mediated cytotoxicity	39	6	0.3	20.31	+	0.00952
positive regulation of type I interferon production	59	9	0.45	20.14	+	1.87e-05
cellular response to virus	56	8	0.42	18.86	+	0.00024
regulation of biological process involved in symbiotic interaction	77	11	0.58	18.86	+	5.37e-07
negative regulation of response to biotic stimulus	106	15	0.8	18.68	+	1.73e-10
response to virus	316	41	2.39	17.13	+	5.38e-33
response to interferon-gamma	130	16	0.98	16.25	+	1.63e-10
positive regulation of response to cytokine stimulus	57	7	0.43	16.21	+	0.00467
pattern recognition receptor signaling pathway	82	10	0.62	16.1	+	1.67e-05
regulation of type I interferon production	94	11	0.71	15.45	+	3.75e-06
negative regulation of cytokine-mediated signaling pathway	67	7	0.51	13.79	+	0.0127
positive regulation of cytokine production involved in immune response	67	7	0.51	13.79	+	0.0127
regulation of innate immune response	214	22	1.62	13.57	+	4.99e-14
regulation of cytokine production involved in immune response	98	10	0.74	13.47	+	8.08e-05
negative regulation of response to cytokine stimulus	71	7	0.54	13.02	+	0.0182
regulation of defense response to virus	71	7	0.54	13.02	+	0.0182
regulation of response to biotic stimulus	327	30	2.48	12.11	+	5.28e-19
regulation of response to cytokine stimulus	147	13	1.11	11.68	+	2.28e-06
regulation of leukocyte mediated cytotoxicity	82	7	0.62	11.27	+	0.0443
cellular response to interferon-gamma	106	9	0.8	11.21	+	0.00197
negative regulation of immune response	190	16	1.44	11.12	+	3.53e-08
regulation of cytokine-mediated signaling pathway	136	11	1.03	10.68	+	0.000136
negative regulation of defense response	222	17	1.68	10.11	+	3e-08
positive regulation of I-kappaB kinase/NF-kappaB signaling	187	14	1.42	9.88	+	3.52e-06
innate immune response	783	56	5.93	9.44	+	3.59e-34
negative regulation of leukocyte cell-cell adhesion	132	9	1	9	+	0.0111
positive regulation of production of molecular mediator of immune response	119	8	0.9	8.88	+	0.0487
regulation of production of molecular mediator of immune response	166	11	1.26	8.75	+	0.000923
negative regulation of immune system process	418	26	3.17	8.21	+	3.79e-12
defense response to other organism	989	61	7.49	8.14	+	2.19e-34
regulation of adaptive immune response	183	11	1.39	7.94	+	0.00234
positive regulation of response to biotic stimulus	167	10	1.26	7.91	+	0.00861
negative regulation of lymphocyte activation	155	9	1.17	7.67	+	0.0388
regulation of I-kappaB kinase/NF-kappaB signaling	246	14	1.86	7.51	+	9.84e-05
regulation of defense response	581	32	4.4	7.27	+	2.84e-14
regulation of leukocyte mediated immunity	226	12	1.71	7.01	+	0.00234
regulation of immune response	905	47	6.86	6.86	+	6.34e-22
positive regulation of immune effector process	234	12	1.77	6.77	+	0.00334
cytokine-mediated signaling pathway	353	18	2.67	6.73	+	3.75e-06
defense response	1387	69	10.51	6.57	+	2.56e-34
response to other organism	1371	68	10.38	6.55	+	1.32e-33
response to external biotic stimulus	1372	68	10.39	6.54	+	1.38e-33
response to cytokine	807	39	6.11	6.38	+	2.43e-16
response to biotic stimulus	1417	68	10.73	6.34	+	9.63e-33
regulation of immune effector process	339	16	2.57	6.23	+	0.000106
immune response	1677	79	12.7	6.22	+	3.05e-39
regulation of cysteine-type endopeptidase activity	237	11	1.8	6.13	+	0.0262
positive regulation of cytokine production	464	21	3.51	5.98	+	9.64e-07
negative regulation of response to external stimulus	376	17	2.85	5.97	+	6.63e-05
biological process involved in interspecies interaction between organisms	1520	68	11.51	5.91	+	6.41e-31
cellular response to cytokine stimulus	702	31	5.32	5.83	+	3.54e-11
regulation of cytokine production	715	31	5.42	5.72	+	5.72e-11
regulation of leukocyte differentiation	279	12	2.11	5.68	+	0.0196
negative regulation of cell adhesion	285	12	2.16	5.56	+	0.0242
immune response-regulating signaling pathway	363	15	2.75	5.46	+	0.00163
regulation of response to external stimulus	908	37	6.88	5.38	+	5.69e-13
regulation of hemopoiesis	353	14	2.67	5.24	+	0.00684
positive regulation of response to external stimulus	417	16	3.16	5.07	+	0.00164
regulation of immune system process	1420	54	10.76	5.02	+	9.44e-20
positive regulation of immune response	562	21	4.26	4.93	+	2.66e-05
immune system process	2368	88	17.94	4.91	+	2.81e-37
regulation of endopeptidase activity	424	15	3.21	4.67	+	0.0108
positive regulation of immune system process	898	30	6.8	4.41	+	1.02e-07
regulation of peptidase activity	452	15	3.42	4.38	+	0.0232
leukocyte activation	502	16	3.8	4.21	+	0.0175
regulation of lymphocyte activation	532	16	4.03	3.97	+	0.036
response to external stimulus	2405	72	18.22	3.95	+	1.63e-22
regulation of response to stress	1241	37	9.4	3.94	+	6.88e-09
response to bacterium	721	21	5.46	3.85	+	0.00166
regulation of leukocyte activation	619	18	4.69	3.84	+	0.0137
adaptive immune response	640	18	4.85	3.71	+	0.0217
regulation of cell activation	663	18	5.02	3.58	+	0.035
regulation of proteolysis	738	19	5.59	3.4	+	0.039
response to stress	3337	80	25.28	3.16	+	9.02e-20
positive regulation of multicellular organismal process	1413	33	10.7	3.08	+	6.78e-05
regulation of hydrolase activity	1033	23	7.82	2.94	+	0.0384
positive regulation of gene expression	1127	24	8.54	2.81	+	0.0487
positive regulation of response to stimulus	2081	44	15.76	2.79	+	2.32e-06
response to organic substance	2686	52	20.35	2.56	+	6.98e-07
cellular response to organic substance	1978	38	14.98	2.54	+	0.000683
positive regulation of molecular function	1507	29	11.42	2.54	+	0.032
regulation of response to stimulus	3795	66	28.75	2.3	+	5.8e-08
regulation of multicellular organismal process	2582	45	19.56	2.3	+	0.000653
cellular response to chemical stimulus	2555	41	19.35	2.12	+	0.023
regulation of molecular function	3065	49	23.22	2.11	+	0.00186
regulation of signal transduction	2855	44	21.63	2.03	+	0.0334
positive regulation of macromolecule metabolic process	3384	52	25.63	2.03	+	0.00313
positive regulation of metabolic process	3678	53	27.86	1.9	+	0.0144
positive regulation of biological process	6064	84	45.93	1.83	+	2.53e-06
negative regulation of biological process	5180	69	39.24	1.76	+	0.00224
response to stimulus	8034	106	60.85	1.74	+	5.25e-09
positive regulation of cellular process	5584	73	42.3	1.73	+	0.00161
regulation of gene expression	4752	62	35.99	1.72	+	0.0333
regulation of biological process	11522	116	87.28	1.33	+	0.0278
Unclassified	2906	9	22.01	0.41	-	0
