# Supplementary material for: Overexpression screen of interferon-stimulated genes identifies RARRES3 as a restrictor of Toxoplasma gondii infection
Source: eLife. 2021 Dec 6;10:e73137. doi: 10.7554/eLife.73137 (PMC8789288; doi:10.7554/eLife.73137)
Supplement: Supplementary file 1. [file elife-73137-supp1.xlsx]

## Sheet: READ ME
Supplementary file 1 Summary of over-expression screen in A549s
EXCEPT FOR TRANDUCTION EFFICIENCY AND PV COUNT ALL VALUES IN THESE LISTS ARE NORMALIZED TO FLUC CONTROL.
	Due to the amount of data here, a color coding system is used.
	Cytotoxic. Average cell number per well is < 65% of control.
	Transduction efficiency is < 5%. Sample size too low for analysis.
	Transduction efficiency is between 5% and 25%.
	Transduction efficiency is between 25% and 50%.
	This color is reserved for the control samples "All Fluc" (the control for this experiment) and "All Untransduced"
	There is nothing of concern if the well color is white.
Tabs / Columns:	NOTE: All lists are sorted with low values on top and high values at the bottom.
A549 Cell Count	Average number of nuclei counted per image for each condition. Nuclei were counted in images at 36 hr post infection
36 hr Transduction Efficiency	Average number of nuclei counted per image with fluorescence intensity above the limit of detection for RFP fluorescence normalized to the number of nuclei counted per image. This is the %transduction.
PV Count	36 HR INFECTION DATA: Total number of parasitophorous vacuoles in RFP expressing cells counted/included in analysis per sample.
PV Area	36 HR INFECTION DATA: Average area of parasitophorous vacuoles in RFP expressing cells.

## Sheet: A549 Cell Count
REPLICATE 1	Cell Count per Image	REPLICATE 2	ISG	Cell Count per Image	AVERAGE	Cell Count
	32.2294		CDKN1A	44.393		38.3112
	60.5258		ASCL2	60.4777		60.5018
	49.3273		SCO2	76.9784		63.1528
	62.575		SLC25A28	65.5587		64.0668
	61.0019		ATF5	81.0481		71.025
	54.585		OAZ3	90.322		72.4535
	56.9861		SP100	90.3138		73.6499
	62.4715		PHF11	89.0805		75.776
	65.8456		PHLDA2	88.9079		77.3767
	87.6423		TEAD4	72.5799		80.1111
	86.2968		CCL7	75.8109		81.0539
	71.331		CXCL11	91.4319		81.3814
	76.3817		MR1	87.2882		81.835
	75.3674		CXCL10	88.8092		82.0883
	74.2703		IFI44	90.1493		82.2098
	86.1933		KYNU	79.9217		83.0575
	94.2248		BCL6	71.955		83.0899
	88.698		DECR1	77.6443		83.1712
	87.1041		C1QB	80.7356		83.9199
	82.3225		IL18BP	86.8114		84.5669
	89.526		CTSC	81.3934		85.4597
	87.2697		ACSL5	84.0818		85.6758
	93.6245		TNF	81.1221		87.3733
	87.2076		GIMAP6	88.7928		88.0002
	89.8158		MT2A	86.5401		88.1779
	89.2983		APOBEC3A	88.4064		88.8523
	89.9814		IL1B	91.1441		90.5628
	80.77		HAPLN3	100.599		90.6845
	85.5723		GLRX	96.0113		90.7918
	73.7321		CXCL9	109.486		91.6093
	81.6187		MT1H	103.37		92.4941
	81.9706		TNFAIP6	103.172		92.5714
	87.1455		TMEM140	100.55		93.8476
	78.8243		PMAIP1	109.396		94.1101
	100.807		FST	88.0282		94.4177
	83.6266		B2M	105.466		94.5463
	80.6251		CCL8	108.582		94.6036
	91.8029		BATF3	97.5487		94.6758
	99.8344		TNFSF10	92.2129		96.0237
	97.3504		EDEM1	97.2939		97.3222
	106.707		RCN1	88.1762		97.4414
	95.2805		SP140	100.566		97.9233
	93.4382		CFH	103.814		98.6259
	81.1012		RGS1	116.409		98.7551
	102.215		RGS3	96.3895		99.3022
	99.8551		TBX21	99.0779		99.4665
	81.9913		ASCC3	117.872		99.9319
	100		TRIP.Fluc	100		100
	95.7566		NT5E	105.343		100.55
	99.5653		CD40	101.939		100.752
	95.1977		STEAP4	108.59		101.894
	104.823		CA11	99.1026		101.963
	83.9785		DDX58	120.265		102.122
	81.7636		EDN1	124.014		102.889
	103.809		FLT3LG	101.988		102.899
	100.89		ST3GAL5	105.77		103.33
	97.4746		UBE2L6	112.068		104.771
	111.468		STX11	98.2476		104.858
	80.8114		DYNLT1	129.383		105.097
	91.8857		CCDC109B	120.035		105.96
	118.63		LGALS3BP	93.4051		106.017
	100.952		ANXA3	111.591		106.272
	100.559		CCL2	112.602		106.581
	104.368		GLUL	108.985		106.676
	111.778		SOCS3	101.857		106.817
	110.039		GM2A	105.737		107.888
	104.699		SLAMF8	113.022		108.86
	101.49		IL1RN	118.135		109.813
	104.223		UBE2Z	116.886		110.554
	102.96		C1R	118.267		110.614
	105.961		ARNTL2	119.295		112.628
	133.823		SEPT4	91.6128		112.718
	104.057		PSAT1	121.424		112.741
	115.794		TRIM5	110.119		112.957
	111.199		CLIC4	115.102		113.15
	114.448		CD7	112.413		113.431
	107.307		FGL2	120.627		113.967
	116.311		BATF2	111.69		114.001
	105.837		MT1X	122.46		114.149
	102.505		C1QA	125.831		114.168
	119.665		DLAT	108.886		114.275
	121.921		TRIM31	107.768		114.845
	108.487		VAMP5	121.523		115.005
	118.443		PSMA4	112.191		115.317
	109.915		FCGR1B	120.799		115.357
	115.69		ISG15	116.886		116.288
	117.615		PTPN1	115.521		116.568
	107.017		CD74	126.628		116.823
	94.2869		CBR3	139.577		116.932
	120.803		PPA1	113.153		116.978
	127.572		PRPS2	111.978		119.775
	140.633		SLC2A6	99.045		119.839
	124.26		KCTD14	115.891		120.075
	107.514		PSME2	132.811		120.162
	104.471		IFI35	135.869		120.17
	122.294		SLC31A2	118.908		120.601
	115.007		SQRDL	126.415		120.711
	122.48		MYD88	119.081		120.78
	128.71		IFI30	113.359		121.035
	111.654		SOD2	130.854		121.254
	109.894		FEM1C	132.77		121.332
	115.897		FZD5	127.393		121.645
	120.824		IFITM3	122.772		121.798
	111.716		SP140L	132.425		122.07
	118.899		ATF3	125.313		122.106
	137.094		CTSS	107.16		122.127
	132.664		VRK2	111.714		122.189
	117.201		HLA-DRA	128.108		122.655
	135.955		SIK1	110.769		123.362
	127.779		ARNTL	119.163		123.471
	119.54		C19ORF66	127.467		123.504
	117.636		ETV7	130.09		123.863
	94.2455		PLA2G4C	153.529		123.887
	121.196		MCL1	127.401		124.299
	125.709		OGFR	123.323		124.516
	125.047		IL15	125.823		125.435
	126.144		IFIT5	124.951		125.547
	121.341		C21orf7	131.339		126.34
	109.108		HLA-DOA	143.606		126.357
	85.3653		RGCC	167.736		126.551
	131.753		HLA-DMB	121.827		126.79
	99.2134		DUSP5	154.582		126.898
	131.815		TRIB1	122.337		127.076
	124.198		ERAP2	130.542		127.37
	166.425		C16ORF7	88.6424		127.534
	119.747		N4BP2L1	135.763		127.755
	124.488		GLS	131.167		127.827
	114.821		GK	142.323		128.572
	120.472		SERPING1	136.856		128.664
	143.987		KIAA1618	113.605		128.796
	124.757		GCH1	133.329		129.043
	145.891		TNFRSF1B	112.216		129.054
	125.419		SOCS1	134.422		129.921
	126.371		NAMPT	134.324		130.348
	126.206		HLA-DQA1	134.727		130.466
	134.051		RALA	126.891		130.471
	132.643		HLA-G	129.309		130.976
	125.254		GBP3	136.988		131.121
	145.332		PML	117.864		131.598
	144.732		FAM46A	118.538		131.635
	109.046		LXN	154.245		131.645
	131.174		AIM2	132.153		131.663
	130.739		PSTPIP2	134.455		132.597
	129.87		RSAD2	135.417		132.643
	108.735		PARP9	156.801		132.768
	137.052		SNTB2	128.577		132.815
	120.927		BTN3A1	145.612		133.27
	131.712		RHOBTB3	135.639		133.676
	121.962		HLA-C	145.702		133.832
	131.733		HLA-DOB	137.431		134.582
	119.789		FCGR1A	149.879		134.834
	128.917		CMAH	142.373		135.645
	140.157		DAPP1	131.611		135.884
	131.029		LGMN	142.521		136.775
	121.9		SLAMF1	152.329		137.115
	118.754		CLIC2	156.579		137.667
	122.832		PSMB8	152.666		137.749
	146.388		HLA-DRB3	129.457		137.922
	134.631		RTP4	141.756		138.193
	106.748		PCLO	170.836		138.792
	146.512		SECTM1	131.175		138.843
	143.821		TAPBP	135.294		139.558
	131.401		C2	147.881		139.641
	128.773		TNFAIP2	150.586		139.679
	130.077		PSME1	149.978		140.027
	140.075		USP18	140.794		140.434
	150.259		C18ORF8	131.002		140.63
	138.046		IRF9	143.524		140.785
	152.867		C1S	129.473		141.17
	136.1		HLA-DMA	146.261		141.181
	94.9907		CCL22	187.838		141.414
	151.791		IFI27	131.208		141.499
	134.382		CD69	149.46		141.921
	125.15		SAMD4A	160.501		142.826
	137.321		IFIT3	148.662		142.992
	147.609		MTHFD2	138.385		142.997
	128.048		CCL5	157.985		143.017
	153.798		SFT2D2	132.392		143.095
	150.362		BACH1	135.96		143.161
	146.036		IFI6	140.358		143.197
	136.638		GIMAP5	149.945		143.292
	129.228		XPNPEP1	157.739		143.483
	139.267		IFIT1	148.366		143.817
	152.598		SP110	135.425		144.012
	139.143		PLEK	149.69		144.416
	145.167		IL32	144.272		144.719
	145.394		STOM	144.305		144.85
	148.561		TRAFD1	141.402		144.982
	144.504		IFITM2	145.826		145.165
	146.429		CCND2	144.65		145.54
	144.421		NADK	147.577		145.999
	145.27		PARP3	147.322		146.296
	111.488		MT1F	181.154		146.321
	138.874		TAP1	153.94		146.407
	153.798		INPP1	139.569		146.684
	146.119		NMI	147.322		146.72
	148.52		FPR1	145.069		146.795
	135.748		FAM107A	157.936		146.842
	130.532		RBCK1	163.214		146.873
	142.31		TREX1	153.143		147.726
	157.359		BTN2A2	139.265		148.312
	136.1		CASP5	160.6		148.35
	147.63		TMEM194A	152.14		149.885
	151.459		MT1G	148.711		150.085
	151.977		PTPN2	148.251		150.114
	148.851		MUC1	151.885		150.368
	163.983		BTN3A2	137.752		150.867
	139.723		SLC1A5	162.096		150.909
	157.814		TNFSF13B	144.625		151.22
	144.546		IFIT2	158.849		151.697
	156.903		DENND1B	146.623		151.763
	155.516		ECGF1	148.522		152.019
	143.925		LCP2	161.578		152.751
	131.463		SCML1	175.21		153.336
	147.05		C20ORF24	161.332		154.191
	140.323		CUL1	168.493		154.408
	149.596		EPSTI1	159.482		154.539
	162.803		WARS	146.648		154.725
	166.984		ANKRD22	142.981		154.983
	159.367		GBP2	151.055		155.211
	152.929		PPPDE2	157.566		155.248
	154.813		STAT3	155.757		155.285
	150.093		SCPEP1	160.715		155.404
	147.485		PIM1	163.56		155.522
	159.574		SAMHD1	151.523		155.548
	141.275		CASP7	170.869		156.072
	163.796		HERC6	149.558		156.677
	152.763		IRF2	160.592		156.677
	126.144		RSG1	187.443		156.793
	140.654		TJP2	173.598		157.126
	152.784		KARS	161.595		157.189
	165.432		FBP1	149.657		157.544
	159.76		XAF1	156.037		157.898
	159.532		SERPINB9	156.736		158.134
	154.502		POLR3D	163.124		158.813
	158.021		STAT1	160.098		159.06
	176.113		HLA-E	142.43		159.271
	148.085		LGALS9	171.181		159.633
	146.14		ZFP36	173.376		159.758
	162.761		GUCY1A3	156.958		159.859
	154.047		KLF4	165.755		159.901
	164.831		CERS6	155.527		160.179
	160.464		PLSCR1	159.967		160.215
	173.401		PLA1A	147.059		160.23
	154.399		STAT2	167.399		160.899
	171.517		GBP5	150.504		161.011
	158.414		KIAA0040	164.349		161.382
	180.211		IRF8	142.693		161.452
	155.765		TLR2	167.161		161.463
	163.838		GADD45B	159.72		161.779
	166.322		HLA-DQB1	157.476		161.899
	142.31		CFB	183.028		162.669
	177.044		IKBKE	148.44		162.742
	160.733		RALB	165.294		163.014
	154.212		CALCOCO2	174.511		164.362
	185.2		PAK1	143.598		164.399
	164.997		EDNRA	164.02		164.508
	181.743		RNF114	147.708		164.726
	174.581		TAP2	156.736		165.658
	166.384		GBP1	166.199		166.291
	175.988		IRF7	156.653		166.321
	171.207		PRKAR2B	162.063		166.635
	181.991		GABBR1	152.206		167.098
	179.901		CD47	154.442		167.171
	175.181		PDCD1LG2	159.21		167.196
	164.686		NBN	170.087		167.387
	173.132		OAS1	162.047		167.589
	150.59		EPB41L4A	185.322		167.956
	158.332		CLEC10A	178.383		168.357
	189.215		TRIM38	147.717		168.466
	151.335		ASS1	186.202		168.768
	197.785		ITGB7	139.84		168.813
	172.18		NOD2	165.804		168.992
	194.059		TRIM22	146.582		170.321
	191.658		C11orf75	150.043		170.851
	183.834		PARP11	158.002		170.918
	173.567		IL12RB1	168.328		170.947
	168.495		APOL2	173.573		171.034
	165.742		ID4	177.832		171.787
	174.809		BCL2A1	168.969		171.889
	188.864		DUSP3	155.741		172.302
	190.25		P2RY14	155.823		173.037
	179.218		HLA-F	168.197		173.707
	166.425		PLEK2	181.515		173.97
	177.023		GIMAP4	171.132		174.078
	163.693		GCNT1	184.533		174.113
	169.944		SLAMF7	178.391		174.168
	168.226		HLA-DPB1	182.091		175.158
	210.101		CX3CL1	140.227		175.164
	179.073		SLC37A1	171.428		175.25
	199.814		SLC2A3	151.252		175.533
	172.407		ITK	179.041		175.724
	154.688		DENND1A	198.814		176.751
	209.273		SLC7A5	144.305		176.789
	180.108		MTTP	173.549		176.828
	136.783		AKAP7	216.901		176.842
	172.925		PROCR	180.956		176.941
	201.49		PCYT1A	152.707		177.099
	172.325		RFX5	182.971		177.648
	175.45		PARP8	180.718		178.084
	176.071		PFKP	181.351		178.711
	193.438		P2RY13	165.804		179.621
	176.941		PLEKHO1	183.152		180.046
	190.871		HLA-DPA1	172.529		181.7
	180.625		LIMK2	182.847		181.736
	200.6		SLC15A3	164.48		182.54
	178.845		WDR25	186.333		182.589
	178.038		LAP3	188.89		183.464
	185.158		IFIH1	184.368		184.763
	217.139		RHBDF2	153.381		185.26
	190.23		GALNT6	181.203		185.716
	193.045		MX1	180.644		186.844
	195.715		CCND1	178.441		187.078
	194.287		HLA-DRB1	180.389		187.338
	176.941		TAPBPL	197.983		187.462
	217.553		LAMP3	158.059		187.806
	199.834		FPR2	175.917		187.875
	181.639		IL6	194.407		188.023
	215.69		DHX58	163.971		189.83
	201.656		SLC25A22	180.003		190.829
	202.194		CD80	179.863		191.029
	216.725		CD38	166.248		191.487
	218.174		DDX60	164.842		191.508
	198.468		TRIM14	184.574		191.521
	201.697		CD274	182.255		191.976
	200.621		BTN3A3	183.965		192.293
	180.791		TMEM109	204.314		192.552
	211.55		OAS2	174.083		192.817
	192.569		BIRC3	193.428		192.999
	210.308		RNF19B	176.147		193.228
	192.859		FBXO6	193.7		193.279
	225.212		GBP4	162.82		194.016
	210.515		GPR109A	177.931		194.223
	220.865		TNFAIP3	168.386		194.625
	188.263		MVP	201.321		194.792
	208.652		RARRES3	181.458		195.055
	206.624		APOL4	184.393		195.508
	199.938		PTGS2	191.126		195.532
	205.444		USP15	186.309		195.876
	207.203		C5orf15	185.084		196.144
	203.001		IDO1	189.4		196.201
	214.655		TDRD7	177.816		196.236
	225.833		IFI44L	168.369		197.101
	207.824		JAK2	188.2		198.012
	207.41		ADAR	190.452		198.931
	210.101		ICAM1	189.038		199.57
	205.941		ASPHD2	193.33		199.635
	214.655		RIPK2	186.128		200.392
	232.457		ZNFX1	168.632		200.545
	221.279		P2RX7	182.609		201.944
	229.559		IL15RA	174.667		202.113
	203.829		PARP12	200.631		202.23
	221.486		OPTN	183.234		202.36
	201.801		VCAM1	203.031		202.416
	200.787		MICB	204.363		202.575
	211.343		ENPP2	195.188		203.266
	229.352		UBA7	179.534		204.443
	217.553		ITGAL	191.431		204.492
	219.623		MYOF	189.688		204.655
	225.833		TLR7	188.043		206.938
	222.935		IRF1	191.209		207.072
	213.62		LMNB1	200.565		207.093
	214.862		SCYL3	200.672		207.767
	205.258		RNF24	210.735		207.996
	224.798		APOL1	191.891		208.345
	192.424		IL10RA	225.007		208.716
	238.874		SELL	181.17		210.022
	225.005		TRIM21	195.319		210.162
	221.693		PDGFA	199.241		210.467
	226.868		PANX1	194.086		210.477
	242.807		USP6NL	179.337		211.072
	229.352		TLR8	194.727		212.04
	230.594		PSMA2	193.519		212.056
	219.209		MX2	206.04		212.625
	238.667		HCP5	188.57		213.618
	250.052		B4GALT5	179.912		214.982
	224.384		CD97	206.353		215.368
	233.699		CEACAM1	197.737		215.718
	260.195		OAS3	171.756		215.976
	219.623		LY6E	212.642		216.133
	233.699		CASP1	199.636		216.667
	243.842		DRAM1	191.628		217.735
	240.53		HSD11B1	196.684		218.607
	221.9		TGM2	215.388		218.644
	251.915		IFI16	186.465		219.19
	243.842		MARCKSL1	196.487		220.164
	234.941		CSF2RB	205.637		220.289
	223.349		SNX10	218.274		220.812
	233.699		BST2	211.902		222.801
	247.982		ISG20	199.348		223.665
	258.332		APOBEC3G	189.178		223.755
	233.699		IL7R	214.722		224.211
	241.358		IFITM1	207.471		224.414
	226.454		DNASE1L3	223.388		224.921
	229.973		PSMB9	220.502		225.238
	233.285		CTSO	218.192		225.738
	232.664		PLAUR	219.392		226.028
	225.833		GPR109B	228.419		227.126
	239.909		FAS	214.961		227.435
	261.644		APOL6	193.346		227.495
	239.909		PSMB10	215.479		227.694
	252.95		CASP4	203.327		228.138
	241.979		CTSL1	214.525		228.252
	254.606		ALAS1	205.58		230.093
	246.74		CNDP2	213.555		230.147
	241.565		SLC6A12	222.36		231.963
	267.439		APOL3	199.841		233.64
	264.128		CASP10	204.725		234.426
	247.982		GOLM1	229.299		238.64
	261.851		RERE	218.34		240.095
	261.644		SPTLC2	231.626		246.635
	270.13		CTSZ	223.93		247.03
	262.058		CH25H	233.435		247.746
	276.547		G3BP2	224.818		250.683
	279.445		BAK1	223.93		251.688
	258.953		FFAR2	250.807		254.88
	276.133		Untransduced	257.557		266.845

## Sheet: Transduction Efficiency
REPLICATE 1	Expression %	ISG	REPLICATE 2	ISG	Expression %	ISG	AVERAGE	Expression %
	1.261	ALAS1		ALAS1	0.0389789	ALAS1		0.649989
	1.353	CTSZ		CTSZ	0.756574	CTSZ		1.05479
	3.019	UBA7		UBA7	0.421468	UBA7		1.72023
	2.7	APOL3		APOL3	1.71736	APOL3		2.20868
	6.956	IFIH1		IFIH1	0.0521362	IFIH1		3.50407
	2.077	BAK1		BAK1	6.87329	BAK1		4.47514
	6.232	PSMB10		PSMB10	7.0112	PSMB10		6.6216
	10.27	HCP5		HCP5	5.21533	HCP5		7.74267
	16.24	MYOF		MYOF	2.74148	MYOF		9.49074
	8.834	IL7R		IL7R	11.1003	IL7R		9.96715
	4.002	FAS		FAS	16.2662	FAS		10.1341
	26.13	TDRD7		TDRD7	1.07862	TDRD7		13.6043
	27.02	CASP4		CASP4	0.224237	CASP4		13.6221
	27.39	TLR8		TLR8	0.0421067	TLR8		13.7161
	7.673	CASP1		CASP1	21.4517	CASP1		14.5624
	21.47	OAS1		OAS1	7.95759	OAS1		14.7138
	0.3872	CASP10		CASP10	30.723	CASP10		15.5551
	28.45	IFITM1		IFITM1	2.74034	IFITM1		15.5952
	11.05	CTSO		CTSO	24.3136	CTSO		17.6818
	18.97	SNX10		SNX10	19.088	SNX10		19.029
	40.18	PDGFA		PDGFA	1.67604	PDGFA		20.928
	15.73	TGM2		TGM2	26.5541	TGM2		21.142
	0.5362	APOBEC3G		APOBEC3G	42.9735	APOBEC3G		21.7549
	20.76	CNDP2		CNDP2	24.7902	CNDP2		22.7751
	32.2	ADAR		ADAR	14.8255	ADAR		23.5127
	47.16	MX2		MX2	0.562448	MX2		23.8612
	6.696	USP6NL		USP6NL	48.0265	USP6NL		27.3612
	54.07	USP15		USP15	0.812282	USP15		27.4411
	9.57	RERE		RERE	45.4771	RERE		27.5235
	3.266	CEACAM1		CEACAM1	56.0344	CEACAM1		29.6502
	62.02	PARP12		PARP12	0.554934	PARP12		31.2875
	13.38	IL6		IL6	49.4207	IL6		31.4003
	61.25	GPR109B		GPR109B	3.54102	GPR109B		32.3955
	67.86	TLR7		TLR7	0.530572	TLR7		34.1953
	68.25	OAS2		OAS2	1.55226	OAS2		34.9011
	0.6484	Untransduced		Untransduced	71.6366	Untransduced		36.1425
	21.88	DDX58		DDX58	55.0286	DDX58		38.4543
	74.8	RNF19B		RNF19B	2.17987	RNF19B		38.4899
	67.04	BST2		BST2	11.1377	BST2		39.0888
	82.42	MX1		MX1	4.23614	MX1		43.3281
	57.74	CUL1		CUL1	29.0214	CUL1		43.3807
	83.71	TAP2		TAP2	4.07979	TAP2		43.8949
	39.67	JAK2		JAK2	49.1367	JAK2		44.4033
	16.36	C5orf15		C5orf15	74.2303	C5orf15		45.2951
	6.126	APOL6		APOL6	84.7607	APOL6		45.4434
	87.01	FEM1C		FEM1C	4.11892	FEM1C		45.5645
	24.9	IFI44L		IFI44L	68.6417	IFI44L		46.7709
	6.216	MARCKSL1		MARCKSL1	87.5478	MARCKSL1		46.8819
	91.21	IFIT3		IFIT3	3.56937	IFIT3		47.3897
	88.81	DHX58		DHX58	6.79683	DHX58		47.8034
	37.09	CTSL1		CTSL1	59.6149	CTSL1		48.3524
	35.88	IRF1		IRF1	61.3538	IRF1		48.6169
	65.26	DNASE1L3		DNASE1L3	32.3639	DNASE1L3		48.8119
	7.485	G3BP2		G3BP2	91.1238	G3BP2		49.3044
	87.66	PTPN2		PTPN2	11.3386	PTPN2		49.4993
	94.23	CMAH		CMAH	5.53244	CMAH		49.8812
	86.12	CD38		CD38	14.0803	CD38		50.1002
	63.79	PARP8		PARP8	37.7551	PARP8		50.7726
	88.89	TRAFD1		TRAFD1	12.6824	TRAFD1		50.7862
	85.7	POLR3D		POLR3D	16.6039	POLR3D		51.152
	84.18	CD274		CD274	18.3935	CD274		51.2867
	20.87	PSMA2		PSMA2	82.6282	PSMA2		51.7491
	94.85	XPNPEP1		XPNPEP1	8.81477	XPNPEP1		51.8324
	48.98	ZFP36		ZFP36	54.7868	ZFP36		51.8834
	88.49	CD80		CD80	17.0484	CD80		52.7692
	61.37	ENPP2		ENPP2	44.7363	ENPP2		53.0531
	53.64	TRIM22		TRIM22	52.8478	TRIM22		53.2439
	7.31	OAS3		OAS3	99.4551	OAS3		53.3826
	86.43	LAP3		LAP3	20.3571	LAP3		53.3935
	69.83	ITGAL		ITGAL	37.8727	ITGAL		53.8513
	28.78	ZNFX1		ZNFX1	79.6204	ZNFX1		54.2002
	87.48	LY6E		LY6E	21.555	LY6E		54.5175
	11.48	IKBKE		IKBKE	97.7758	IKBKE		54.6279
	20.06	DDX60		DDX60	90.8568	DDX60		55.4584
	81.44	ID4		ID4	30.3757	ID4		55.9079
	92.1	FBXO6		FBXO6	19.7835	FBXO6		55.9417
	12.48	IFI16		IFI16	99.8916	IFI16		56.1858
	84.64	PLSCR1		PLSCR1	28.5521	PLSCR1		56.5961
	26.48	DRAM1		DRAM1	86.958	DRAM1		56.719
	96.97	ASS1		ASS1	16.8602	ASS1		56.9151
	97.26	PCLO		PCLO	16.9655	PCLO		57.1127
	85.3	MTTP		MTTP	29.0845	MTTP		57.1922
	95.37	PROCR		PROCR	19.6411	PROCR		57.5055
	96.42	C18ORF8		C18ORF8	19.1011	C18ORF8		57.7605
	97.65	SP140L		SP140L	18.7695	SP140L		58.2097
	92.42	NAMPT		NAMPT	24.188	NAMPT		58.304
	52.56	APOL4		APOL4	64.3554	APOL4		58.4577
	90.08	CASP7		CASP7	28.6387	CASP7		59.3593
	97.4	LXN		LXN	22.1253	LXN		59.7626
	92.83	EPSTI1		EPSTI1	26.7429	EPSTI1		59.7865
	52.37	SPTLC2		SPTLC2	67.2357	SPTLC2		59.8028
	98.28	TNFAIP2		TNFAIP2	23.2208	TNFAIP2		60.7504
	26.8	FFAR2		FFAR2	98.4839	FFAR2		62.6419
	85.99	DENND1A		DENND1A	43.3142	DENND1A		64.6521
	50.32	SLC6A12		SLC6A12	79.6392	SLC6A12		64.9796
	93.97	PSMB8		PSMB8	38.0304	PSMB8		66.0002
	66.56	KLF4		KLF4	65.6928	KLF4		66.1264
	97.98	PSAT1		PSAT1	34.8355	PSAT1		66.4078
	86.23	RTP4		RTP4	47.4929	RTP4		66.8614
	94.76	LGALS9		LGALS9	40.3422	LGALS9		67.5511
	36.94	RIPK2		RIPK2	99.1518	RIPK2		68.0459
	65.73	FAM46A		FAM46A	71.8272	FAM46A		68.7786
	59.38	CD97		CD97	78.2856	CD97		68.8328
	93.29	MT1G		MT1G	45.0589	MT1G		69.1744
	74.22	TNFAIP3		TNFAIP3	65.275	TNFAIP3		69.7475
	98.16	STEAP4		STEAP4	41.7065	STEAP4		69.9332
	64.58	CH25H		CH25H	75.3919	CH25H		69.9859
	98.43	ANXA3		ANXA3	41.6556	ANXA3		70.0428
	55.56	ISG20		ISG20	85.2033	ISG20		70.3816
	65.76	PSMB9		PSMB9	75.0777	PSMB9		70.4188
	99.78	EDNRA		EDNRA	42.8654	EDNRA		71.3227
	96.31	IFITM2		IFITM2	46.804	IFITM2		71.557
	85.1	TMEM194A		TMEM194A	58.3625	TMEM194A		71.7313
	95.27	IFI27		IFI27	48.3503	IFI27		71.8101
	51.91	P2RY14		P2RY14	93.1257	P2RY14		72.5179
	47	OPTN		OPTN	98.0849	OPTN		72.5425
	98.02	SERPING1		SERPING1	47.0848	SERPING1		72.5524
	62.17	BACH1		BACH1	82.9582	BACH1		72.5641
	94.83	PARP3		PARP3	50.7628	PARP3		72.7964
	74.78	RFX5		RFX5	71.1485	RFX5		72.9642
	96.96	IL1RN		IL1RN	49.5553	IL1RN		73.2577
	88.97	ANKRD22		ANKRD22	58.7481	ANKRD22		73.859
	64.41	TJP2		TJP2	83.6448	TJP2		74.0274
	65.64	KIAA0040		KIAA0040	82.6536	KIAA0040		74.1468
	99.03	CCL22		CCL22	49.6183	CCL22		74.3242
	93.16	WDR25		WDR25	55.6499	WDR25		74.4049
	52.55	SELL		SELL	97.3216	SELL		74.9358
	93.32	HLA-DRB1		HLA-DRB1	56.61	HLA-DRB1		74.965
	99.09	CA11		CA11	50.945	CA11		75.0175
	50.79	PTGS2		PTGS2	99.9626	PTGS2		75.3763
	93.2	TREX1		TREX1	57.701	TREX1		75.4505
	81.28	PAK1		PAK1	69.6421	PAK1		75.4611
	98.96	KCTD14		KCTD14	53.1136	KCTD14		76.0368
	94.98	DAPP1		DAPP1	57.2085	DAPP1		76.0942
	75.48	RHBDF2		RHBDF2	76.7321	RHBDF2		76.106
	55.48	GBP4		GBP4	97.8547	GBP4		76.6673
	98.25	DYNLT1		DYNLT1	55.3252	DYNLT1		76.7876
	88.87	GBP5		GBP5	65.8363	GBP5		77.3531
	59.96	NBN		NBN	95.3707	NBN		77.6653
	57.58	VCAM1		VCAM1	99.9879	VCAM1		78.7839
	98.4	IFITM3		IFITM3	59.4783	IFITM3		78.9391
	77.11	PLEKHO1		PLEKHO1	81.1743	PLEKHO1		79.1422
	95.3	AKAP7		AKAP7	63.2955	AKAP7		79.2978
	72.22	CFB		CFB	87.3472	CFB		79.7836
	60.52	TRIM21		TRIM21	99.5244	TRIM21		80.0222
	81.16	TRIM38		TRIM38	79.227	TRIM38		80.1935
	95.39	TRIB1		TRIB1	65.6016	TRIB1		80.4958
	80.33	AIM2		AIM2	82.9731	AIM2		81.6516
	80.83	ASPHD2		ASPHD2	83.9392	ASPHD2		82.3846
	75.82	ICAM1		ICAM1	89.1367	ICAM1		82.4784
	66.27	HERC6		HERC6	98.7749	HERC6		82.5225
	65.56	CD47		CD47	99.5305	CD47		82.5452
	89.59	TRIM31		TRIM31	75.5474	TRIM31		82.5687
	85.59	GPR109A		GPR109A	79.5636	GPR109A		82.5768
	68.33	VRK2		VRK2	97.5263	VRK2		82.9281
	88.28	XAF1		XAF1	77.7522	XAF1		83.0161
	86.81	ARNTL		ARNTL	79.4674	ARNTL		83.1387
	68.03	LMNB1		LMNB1	98.6069	LMNB1		83.3185
	75.57	CLEC10A		CLEC10A	91.3091	CLEC10A		83.4395
	85.55	GLS		GLS	81.6091	GLS		83.5795
	77.56	GABBR1		GABBR1	90.2213	GABBR1		83.8907
	68.87	APOBEC3A		APOBEC3A	99.3101	APOBEC3A		84.09
	68.6	GOLM1		GOLM1	99.7195	GOLM1		84.1598
	75.82	SCYL3		SCYL3	92.9412	SCYL3		84.3806
	71.7	IL15RA		IL15RA	97.2254	IL15RA		84.4627
	81.09	DUSP3		DUSP3	88.0892	DUSP3		84.5896
	83.48	IRF2		IRF2	86.1872	IRF2		84.8336
	94.25	TMEM140		TMEM140	75.8476	TMEM140		85.0488
	70.63	B4GALT5		B4GALT5	99.8471	B4GALT5		85.2386
	91.12	RNF114		RNF114	79.4828	RNF114		85.3014
	73.35	P2RY13		P2RY13	97.2824	P2RY13		85.3162
	92.87	FCGR1A		FCGR1A	77.8508	FCGR1A		85.3604
	74.26	BIRC3		BIRC3	96.632	BIRC3		85.446
	84.8	BTN3A3		BTN3A3	86.3778	BTN3A3		85.5889
	80.96	MTHFD2		MTHFD2	91.1166	MTHFD2		86.0383
	77.08	CSF2RB		CSF2RB	95.4281	CSF2RB		86.2541
	85.51	NOD2		NOD2	87.7274	NOD2		86.6187
	89.03	APOL2		APOL2	84.4611	APOL2		86.7455
	84.02	APOL1		APOL1	89.7096	APOL1		86.8648
	74.22	PLAUR		PLAUR	99.8045	PLAUR		87.0122
	92.53	CERS6		CERS6	81.7429	CERS6		87.1365
	99.5	CXCL9		CXCL9	74.9246	CXCL9		87.2123
	84.67	GIMAP4		GIMAP4	89.7697	GIMAP4		87.2199
	80.88	TAP1		TAP1	93.6943	TAP1		87.2871
	84.15	INPP1		INPP1	90.5747	INPP1		87.3623
	93.38	OAZ3		OAZ3	81.5932	OAZ3		87.4866
	82.74	TLR2		TLR2	92.3806	TLR2		87.5603
	92.59	DUSP5		DUSP5	82.9596	DUSP5		87.7748
	77.36	RARRES3		RARRES3	98.6741	RARRES3		88.0171
	80.55	PCYT1A		PCYT1A	95.5572	PCYT1A		88.0536
	99.86	MT1H		MT1H	76.2727	MT1H		88.0663
	90.45	USP18		USP18	85.8227	USP18		88.1364
	83.23	SP100		SP100	93.1384	SP100		88.1842
	99.91	GLUL		GLUL	76.7079	GLUL		88.309
	87.99	SAMHD1		SAMHD1	88.6531	SAMHD1		88.3215
	96.58	C20ORF24		C20ORF24	80.2416	C20ORF24		88.4108
	77.43	P2RX7		P2RX7	99.6057	P2RX7		88.5178
	91.77	IFIT1		IFIT1	85.444	IFIT1		88.607
	87.19	SCPEP1		SCPEP1	90.0812	SCPEP1		88.6356
	83.62	PFKP		PFKP	93.7259	PFKP		88.6729
	79.85	C11orf75		C11orf75	97.5448	C11orf75		88.6974
	80.76	PML		PML	96.9787	PML		88.8693
	78.06	STAT2		STAT2	99.8927	STAT2		88.9763
	82.43	TMEM109		TMEM109	95.67	TMEM109		89.05
	95.26	ST3GAL5		ST3GAL5	83.1107	ST3GAL5		89.1853
	86.47	IFIT2		IFIT2	91.9979	IFIT2		89.2339
	79.16	TRIM14		TRIM14	99.7566	TRIM14		89.4583
	84.37	LIMK2		LIMK2	95.5908	LIMK2		89.9804
	89.41	ACSL5		ACSL5	90.7831	ACSL5		90.0965
	86.26	DLAT		DLAT	94.2071	DLAT		90.2336
	86.88	CTSS		CTSS	93.6706	CTSS		90.2753
	88.88	GBP3		GBP3	91.7336	GBP3		90.3068
	97.17	PHF11		PHF11	83.7547	PHF11		90.4623
	96.51	CD69		CD69	84.5909	CD69		90.5505
	81.86	GUCY1A3		GUCY1A3	99.3828	GUCY1A3		90.6214
	83.69	CASP5		CASP5	97.5919	CASP5		90.6409
	82.27	MVP		MVP	99.0577	MVP		90.6639
	81.46	CALCOCO2		CALCOCO2	100	CALCOCO2		90.73
	84.51	SLAMF7		SLAMF7	97.007	SLAMF7		90.7585
	92.49	GBP1		GBP1	89.2023	GBP1		90.8461
	83.02	HSD11B1		HSD11B1	98.9637	HSD11B1		90.9919
	87.89	CX3CL1		CX3CL1	94.1766	CX3CL1		91.0333
	82.12	RHOBTB3		RHOBTB3	99.9702	RHOBTB3		91.0451
	86	PARP11		PARP11	96.5537	PARP11		91.2769
	91.07	GK		GK	91.5907	GK		91.3303
	85.51	RNF24		RNF24	97.2012	RNF24		91.3556
	86.86	C16ORF7		C16ORF7	96.081	C16ORF7		91.4705
	83.34	PSMA4		PSMA4	99.6564	PSMA4		91.4982
	86.97	NMI		NMI	96.0814	NMI		91.5257
	83.16	SLC2A3		SLC2A3	99.9635	SLC2A3		91.5617
	87.59	SLC25A28		SLC25A28	95.5413	SLC25A28		91.5656
	93.15	WARS		WARS	90.2064	WARS		91.6782
	89.63	CFH		CFH	93.8408	CFH		91.7354
	89.55	ITK		ITK	94.0425	ITK		91.7963
	92.83	SNTB2		SNTB2	90.8395	SNTB2		91.8348
	89.42	GCNT1		GCNT1	94.4309	GCNT1		91.9255
	96.29	HLA-E		HLA-E	87.6872	HLA-E		91.9886
	85.7	ITGB7		ITGB7	98.3162	ITGB7		92.0081
	84.26	TBX21		TBX21	99.8536	TBX21		92.0568
	84.32	LCP2		LCP2	99.9691	LCP2		92.1445
	92.17	C1S		C1S	92.2144	C1S		92.1922
	90.86	PLEK		PLEK	93.5744	PLEK		92.2172
	90.86	IFIT5		IFIT5	93.7067	IFIT5		92.2833
	86.52	HLA-DPA1		HLA-DPA1	98.2043	HLA-DPA1		92.3621
	85.45	FBP1		FBP1	99.5614	FBP1		92.5057
	95	SOCS1		SOCS1	90.1464	SOCS1		92.5732
	86.41	PLA1A		PLA1A	98.7368	PLA1A		92.5734
	97.35	RSG1		RSG1	88.0671	RSG1		92.7085
	88.8	SQRDL		SQRDL	96.7336	SQRDL		92.7668
	92.5	BTN2A2		BTN2A2	93.0979	BTN2A2		92.7989
	87.23	HLA-DRA		HLA-DRA	98.3765	HLA-DRA		92.8032
	90.28	GALNT6		GALNT6	95.6638	GALNT6		92.9719
	86.31	IRF7		IRF7	99.9736	IRF7		93.1418
	89.26	KARS		KARS	97.3816	KARS		93.3208
	97.1	TRIM5		TRIM5	89.5837	TRIM5		93.3419
	87.13	PTPN1		PTPN1	99.5797	PTPN1		93.3549
	88.77	RALB		RALB	98.0033	RALB		93.3867
	86.92	PARP9		PARP9	100	PARP9		93.46
	87.01	PRKAR2B		PRKAR2B	99.9492	PRKAR2B		93.4796
	91.94	DENND1B		DENND1B	95.0439	DENND1B		93.492
	94.65	GBP2		GBP2	92.4298	GBP2		93.5399
	87.15	STAT3		STAT3	99.9841	STAT3		93.567
	95.43	PPA1		PPA1	91.7877	PPA1		93.6088
	89.75	CLIC2		CLIC2	97.4781	CLIC2		93.614
	89.89	SP110		SP110	97.3572	SP110		93.6236
	87.88	KIAA1618		KIAA1618	99.3994	KIAA1618		93.6397
	88.08	IRF9		IRF9	99.2237	IRF9		93.6518
	90.54	LAMP3		LAMP3	96.7677	LAMP3		93.6538
	99.89	IL18BP		IL18BP	87.5056	IL18BP		93.6978
	89.34	HLA-DPB1		HLA-DPB1	98.2343	HLA-DPB1		93.7871
	90.49	IDO1		IDO1	97.1795	IDO1		93.8347
	94.65	MUC1		MUC1	93.0421	MUC1		93.8461
	88.21	IL15		IL15	99.8253	IL15		94.0176
	88.62	SCML1		SCML1	99.4599	SCML1		94.0399
	88.8	STAT1		STAT1	99.3489	STAT1		94.0745
	94.36	CDKN1A		CDKN1A	93.8388	CDKN1A		94.0994
	88.69	PSTPIP2		PSTPIP2	99.6095	PSTPIP2		94.1498
	90	SLC15A3		SLC15A3	98.307	SLC15A3		94.1535
	88.86	PRPS2		PRPS2	99.5322	PRPS2		94.1961
	91.38	RSAD2		RSAD2	97.7298	RSAD2		94.5549
	89.11	SLAMF1		SLAMF1	100	SLAMF1		94.555
	90.85	N4BP2L1		N4BP2L1	98.271	N4BP2L1		94.5605
	93.42	IFI6		IFI6	95.8913	IFI6		94.6556
	89.62	SLC7A5		SLC7A5	100	SLC7A5		94.81
	95.64	MICB		MICB	94.0468	MICB		94.8434
	91.44	PLA2G4C		PLA2G4C	98.3341	PLA2G4C		94.887
	92.09	GADD45B		GADD45B	97.835	GADD45B		94.9625
	96.34	All Fluc		TRIP.Fluc	93.7525	TRIP.Fluc		95.0463
	97.05	SLAMF8		SLAMF8	93.1642	SLAMF8		95.1071
	90.7	BTN3A1		BTN3A1	99.5846	BTN3A1		95.1423
	91.9	C1R		C1R	98.4979	C1R		95.199
	95.8	SERPINB9		SERPINB9	94.7158	SERPINB9		95.2579
	90.71	TNFSF10		TNFSF10	99.838	TNFSF10		95.274
	90.64	SLC2A6		SLC2A6	99.9834	SLC2A6		95.3117
	92.39	RALA		RALA	98.3759	RALA		95.383
	92.19	FPR1		FPR1	98.6615	FPR1		95.4257
	91.73	MYD88		MYD88	99.2087	MYD88		95.4693
	94.55	IL10RA		IL10RA	96.5843	IL10RA		95.5671
	91.87	STX11		STX11	99.3108	STX11		95.5904
	91.82	IRF8		IRF8	99.3806	IRF8		95.6003
	92.41	HLA-DMB		HLA-DMB	98.7915	HLA-DMB		95.6008
	92.48	ETV7		ETV7	98.8555	ETV7		95.6677
	94.27	PDCD1LG2		PDCD1LG2	97.0771	PDCD1LG2		95.6736
	92.42	STOM		STOM	99.0061	STOM		95.7131
	95.83	SLC1A5		SLC1A5	95.5986	SLC1A5		95.7143
	92.45	ASCC3		ASCC3	99.0975	ASCC3		95.7738
	92.01	FCGR1B		FCGR1B	99.5651	FCGR1B		95.7876
	92.13	TNFSF13B		TNFSF13B	99.6141	TNFSF13B		95.8721
	93.71	ARNTL2		ARNTL2	98.0913	ARNTL2		95.9006
	96.14	HLA-F		HLA-F	95.7578	HLA-F		95.9489
	92.83	RBCK1		RBCK1	99.1659	RBCK1		95.9979
	92	BTN3A2		BTN3A2	100	BTN3A2		96
	93.59	FLT3LG		FLT3LG	98.6378	FLT3LG		96.1139
	93.98	C1QA		C1QA	98.3351	C1QA		96.1576
	98.25	FAM107A		FAM107A	94.0813	FAM107A		96.1656
	92.55	CLIC4		CLIC4	99.8073	CLIC4		96.1787
	96.55	TNFAIP6		TNFAIP6	95.827	TNFAIP6		96.1885
	97.34	ISG15		ISG15	95.0851	ISG15		96.2125
	92.43	FPR2		FPR2	99.9952	FPR2		96.2126
	94.02	PANX1		PANX1	98.4095	PANX1		96.2148
	92.54	IL12RB1		IL12RB1	99.9411	IL12RB1		96.2406
	92.53	C21orf7		C21orf7	100	C21orf7		96.265
	92.68	LGALS3BP		LGALS3BP	99.9472	LGALS3BP		96.3136
	94.52	PLEK2		PLEK2	98.1077	PLEK2		96.3139
	96.96	EPB41L4A		EPB41L4A	95.6856	EPB41L4A		96.3228
	92.8	LGMN		LGMN	99.8567	LGMN		96.3284
	92.7	SEPT4		SEPT4	99.9915	SEPT4		96.3457
	92.94	BCL6		BCL6	99.8382	BCL6		96.3891
	95.06	MCL1		MCL1	97.7751	MCL1		96.4176
	93.18	ATF5		ATF5	99.9198	ATF5		96.5499
	94.68	GCH1		GCH1	98.4865	GCH1		96.5833
	93.49	PIM1		PIM1	99.8209	PIM1		96.6554
	93.47	TAPBPL		TAPBPL	99.842	TAPBPL		96.656
	95.39	MT1F		MT1F	97.9302	MT1F		96.6601
	93.63	SFT2D2		SFT2D2	100	SFT2D2		96.815
	93.69	C2		C2	99.9832	C2		96.8366
	94.29	HLA-G		HLA-G	99.4321	HLA-G		96.861
	93.81	BCL2A1		BCL2A1	99.9331	BCL2A1		96.8716
	94.1	RCN1		RCN1	99.8135	RCN1		96.9567
	96.16	HLA-DRB3		HLA-DRB3	97.8276	HLA-DRB3		96.9938
	94.09	PPPDE2		PPPDE2	99.9218	PPPDE2		97.0059
	94.04	IFI30		IFI30	100	IFI30		97.02
	94.56	OGFR		OGFR	99.5186	OGFR		97.0393
	94.12	HLA-DQB1		HLA-DQB1	100	HLA-DQB1		97.06
	97.54	C19ORF66		C19ORF66	96.6493	C19ORF66		97.0947
	94.42	ECGF1		ECGF1	99.794	ECGF1		97.107
	94.97	CCND2		CCND2	99.2901	CCND2		97.1301
	94.29	RGS3		RGS3	99.9911	RGS3		97.1405
	96.06	SAMD4A		SAMD4A	98.2567	SAMD4A		97.1583
	94.86	SP140		SP140	99.4869	SP140		97.1735
	94.38	MR1		MR1	99.9914	MR1		97.1857
	95.11	FST		FST	99.4331	FST		97.2715
	94.61	CD74		CD74	99.9739	CD74		97.2919
	94.64	SECTM1		SECTM1	99.9482	SECTM1		97.2941
	94.99	SIK1		SIK1	99.6088	SIK1		97.2994
	94.72	BATF3		BATF3	99.8896	BATF3		97.3048
	95.79	CBR3		CBR3	98.8388	CBR3		97.3144
	95.51	VAMP5		VAMP5	99.1915	VAMP5		97.3508
	95.62	HLA-DQA1		HLA-DQA1	99.0947	HLA-DQA1		97.3573
	94.74	TEAD4		TEAD4	100	TEAD4		97.37
	94.81	NT5E		NT5E	99.9918	NT5E		97.4009
	96.01	ERAP2		ERAP2	99.0375	ERAP2		97.5237
	97.68	BATF2		BATF2	97.3679	BATF2		97.524
	95.69	PHLDA2		PHLDA2	99.4849	PHLDA2		97.5874
	95.7	SLC25A22		SLC25A22	99.6398	SLC25A22		97.6699
	95.47	DECR1		DECR1	99.9558	DECR1		97.7129
	96.43	EDN1		EDN1	98.998	EDN1		97.714
	98.14	CCL8		CCL8	97.3967	CCL8		97.7683
	97.22	SLC37A1		SLC37A1	98.3644	SLC37A1		97.7922
	95.74	FGL2		FGL2	99.8565	FGL2		97.7983
	95.61	PSME2		PSME2	100	PSME2		97.805
	95.62	GIMAP5		GIMAP5	99.9944	GIMAP5		97.8072
	98.31	CXCL11		CXCL11	97.3089	CXCL11		97.8095
	97.24	UBE2L6		UBE2L6	98.4953	UBE2L6		97.8677
	99.23	EDEM1		EDEM1	96.5217	EDEM1		97.8759
	96.04	HLA-C		HLA-C	99.7253	HLA-C		97.8827
	95.78	HLA-DOB		HLA-DOB	99.988	HLA-DOB		97.884
	96.54	PSME1		PSME1	99.2813	PSME1		97.9107
	96.87	CCL7		CCL7	99.219	CCL7		98.0445
	96.16	NADK		NADK	99.9888	NADK		98.0744
	96.18	CD40		CD40	99.9757	CD40		98.0778
	96.44	PMAIP1		PMAIP1	99.7363	PMAIP1		98.0881
	96.29	KYNU		KYNU	99.9193	KYNU		98.1046
	97.23	FZD5		FZD5	99.0231	FZD5		98.1266
	96.42	HLA-DOA		HLA-DOA	100	HLA-DOA		98.21
	96.5	TNFRSF1B		TNFRSF1B	99.9929	TNFRSF1B		98.2464
	96.54	CCL5		CCL5	99.9739	CCL5		98.257
	98.58	GLRX		GLRX	97.9783	GLRX		98.2791
	96.9	SCO2		SCO2	99.6831	SCO2		98.2916
	96.73	SLC31A2		SLC31A2	99.8536	SLC31A2		98.2918
	96.69	IFI35		IFI35	99.9005	IFI35		98.2953
	96.75	HLA-DMA		HLA-DMA	100	HLA-DMA		98.375
	96.87	SOCS3		SOCS3	99.992	SOCS3		98.431
	97.68	GM2A		GM2A	99.2198	GM2A		98.4499
	97.06	CTSC		CTSC	99.9311	CTSC		98.4956
	97.01	UBE2Z		UBE2Z	100	UBE2Z		98.505
	97.56	TAPBP		TAPBP	99.521	TAPBP		98.5405
	97.37	CCDC109B		CCDC109B	99.767	CCDC109B		98.5685
	97.7	HAPLN3		HAPLN3	99.4583	HAPLN3		98.5792
	98.77	IFI44		IFI44	98.5021	IFI44		98.636
	98.9	MT1X		MT1X	98.4259	MT1X		98.6629
	97.94	TNF		TNF	99.53	TNF		98.735
	97.48	IL32		IL32	99.9946	IL32		98.7373
	97.6	GIMAP6		GIMAP6	100	GIMAP6		98.8
	97.66	CCND1		CCND1	99.9952	CCND1		98.8276
	97.96	MT2A		MT2A	99.7995	MT2A		98.8797
	98	CCL2		CCL2	99.9434	CCL2		98.9717
	98.54	C1QB		C1QB	99.4224	C1QB		98.9812
	98.25	RGS1		RGS1	99.886	RGS1		99.068
	98.45	ATF3		ATF3	99.7063	ATF3		99.0782
	99.25	RGCC		RGCC	98.9198	RGCC		99.0849
	99.73	B2M		B2M	98.5415	B2M		99.1358
	98.33	SOD2		SOD2	100	SOD2		99.165
	99.14	CXCL10		CXCL10	99.5808	CXCL10		99.3604
	98.83	CD7		CD7	99.9928	CD7		99.4114
	99.47	IL1B		IL1B	99.8207	IL1B		99.6454
	99.3	ASCL2		ASCL2	100	ASCL2		99.65

## Sheet: PV Area and Count
REPLICATE 1	ISG	PV Count	PV Area	REPLICATE 2	ISG	PV Count	PV Area	OVERALL	ISG	TOTAL PV Count	PV Area
	RARRES3	1180	64.9351		RARRES3	5664	86.326		RARRES3	6844	75.6305
	TRIM31	748	79.026		TRIM31	3011	84.0878		TRIM31	3759	81.5569
	IFIH1	120	116.104		IFIH1	10	47.4573		IFIH1	130	81.7806
	IRF1	664	75.6494		IRF1	3608	89.5335		IRF1	4272	82.5914
	PARP11	800	74.6104		PARP11	3044	90.9751		PARP11	3844	82.7927
	SLAMF8	836	84.4805		SLAMF8	3616	88.3658		SLAMF8	4452	86.4232
	TBX21	854	79.2208		TBX21	3482	93.9097		TBX21	4336	86.5653
	HLA-DRB3	833	87.7922		HLA-DRB3	2133	87.0109		HLA-DRB3	2966	87.4015
	PML	1055	81.4286		PML	3501	94.0139		PML	4556	87.7212
	P2RY13	846	84.6104		P2RY13	3805	93.6457		P2RY13	4651	89.1281
	MT1G	648	85.9091		MT1G	1923	92.8165		MT1G	2571	89.3628
	ATF3	1145	92.6623		ATF3	4319	86.3491		ATF3	5464	89.5057
	CCND2	634	92.5974		CCND2	3886	88.0262		CCND2	4520	90.3118
	IL10RA	915	87.7922		IL10RA	4104	92.8819		IL10RA	5019	90.3371
	TNFRSF1B	1361	88.0519		TNFRSF1B	5347	92.813		TNFRSF1B	6708	90.4325
	STX11	902	90.1299		STX11	4131	90.7662		STX11	5033	90.448
	PSME2	974	87.1429		PSME2	4563	93.8631		PSME2	5537	90.503
	PAK1	1048	89.5455		PAK1	3970	92.0828		PAK1	5018	90.8141
	RABGGTA	1145	91.6234		RABGGTA	4556	90.1501		RABGGTA	5701	90.8867
	USP18	818	94.4805		USP18	4094	87.5458		USP18	4912	91.0132
	IFITM2	697	89.2208		IFITM2	2106	92.8664		IFITM2	2803	91.0436
	TNFSF10	855	86.039		TNFSF10	3347	96.3844		TNFSF10	4202	91.2117
	IKBKE	256	92.4026		IKBKE	4031	90.0571		IKBKE	4287	91.2298
	BTN2A2	1060	89.4156		BTN2A2	3504	93.2696		BTN2A2	4564	91.3426
	EDEM1	754	88.961		EDEM1	2897	93.819		EDEM1	3651	91.39
	LAMP3	832	91.039		LAMP3	3260	92.0237		LAMP3	4092	91.5313
	TAPBPL	884	84.3506		TAPBPL	3634	98.982		TAPBPL	4518	91.6663
	MUC1	935	92.6623		MUC1	4060	90.7627		MUC1	4995	91.7125
	SP100	402	89.6753		SP100	3693	93.7999		SP100	4095	91.7376
	FPR1	819	88.3117		FPR1	4074	95.2779		FPR1	4893	91.7948
	PSMA5	720	90.7792		PSMA5	3389	93.12		PSMA5	4109	91.9496
	NME1	1120	89.5455		NME1	4046	94.8875		NME1	5166	92.2165
	CD47	1021	94.7403		CD47	5008	89.8372		CD47	6029	92.2887
	C19ORF66	878	91.4935		C19ORF66	4476	93.3248		C19ORF66	5354	92.4092
	B4GALT5	1107	93.2468		B4GALT5	4337	91.7627		B4GALT5	5444	92.5047
	HLA-DMB	856	87.3377		HLA-DMB	3310	97.9928		HLA-DMB	4166	92.6652
	FCGR1A	1194	83.5065		FCGR1A	3190	101.973		FCGR1A	4384	92.7399
	CX3CL1	973	92.013		CX3CL1	4147	93.5019		CX3CL1	5120	92.7575
	TNFSF13B	753	90.5195		TNFSF13B	3484	95.2278		TNFSF13B	4237	92.8736
	IRF7	952	86.6234		IRF7	4047	99.1309		IRF7	4999	92.8771
	GPR109A	916	87.5325		GPR109A	3338	98.2373		GPR109A	4254	92.8849
	RFX5	1258	86.6234		RFX5	3912	99.4574		RFX5	5170	93.0404
	SLC37A1	865	83.5714		SLC37A1	2414	102.692		SLC37A1	3279	93.1317
	HLA-F	879	95.3247		HLA-F	3752	90.958		HLA-F	4631	93.1413
	RSAD2	779	96.1039		RSAD2	4524	90.215		RSAD2	5303	93.1595
	TNFAIP6	865	94.4805		TNFAIP6	3930	91.8747		TNFAIP6	4795	93.1776
	SLC31A2	738	89.8701		SLC31A2	3683	96.5794		SLC31A2	4421	93.2248
	SAMHD1	935	96.1039		SAMHD1	4152	90.3706		SAMHD1	5087	93.2372
	GPD2	939	89.9351		GPD2	3342	96.555		GPD2	4281	93.245
	PCYT1A	1113	94.026		PCYT1A	4425	92.5257		PCYT1A	5538	93.2758
	PSME1	1361	89.3506		PSME1	4557	97.2258		PSME1	5918	93.2882
	XRN1	944	92.8571		XRN1	3883	93.8219		XRN1	4827	93.3395
	GIMAP4	1395	90.7143		GIMAP4	4344	96.2518		GIMAP4	5739	93.4831
	DUSP5	985	91.4286		DUSP5	3815	95.5571		DUSP5	4800	93.4928
	FZD5	754	87.1429		FZD5	3319	99.9551		FZD5	4073	93.549
	ITGB7	1026	93.8961		ITGB7	5460	93.2292		ITGB7	6486	93.5626
	CALCOCO2	728	93.8961		CALCOCO2	5353	93.4081		CALCOCO2	6081	93.6521
	PPA1	1055	95.3247		PPA1	4594	91.9851		PPA1	5649	93.6549
	HLA-DMA	1054	94.4805		HLA-DMA	4777	93.0206		HLA-DMA	5831	93.7505
	DRAM1	532	96.2338		DRAM1	4786	91.4335		DRAM1	5318	93.8336
	MICB	922	81.4935		MICB	2567	106.236		MICB	3489	93.8649
	CXCL10	647	95.974		CXCL10	2609	91.8168		CXCL10	3256	93.8954
	STAT1	849	96.7532		STAT1	3906	91.1425		STAT1	4755	93.9479
	SOCS1	1029	96.1039		SOCS1	4509	91.9209		SOCS1	5538	94.0124
	LCP2	1116	94.0909		LCP2	5038	94.0898		LCP2	6154	94.0904
	PCGF5	717	90.7143		PCGF5	3255	97.5964		PCGF5	3972	94.1553
	TRIM5	694	95.7792		TRIM5	2232	92.5459		TRIM5	2926	94.1626
	TMEM194A	769	90.8442		TMEM194A	3031	97.5226		TMEM194A	3800	94.1834
	PIM1	890	88.6364		PIM1	4645	99.8999		PIM1	5535	94.2681
	WARS	665	91.7532		WARS	2907	96.9937		WARS	3572	94.3735
	SCML1	703	90.2597		SCML1	3608	98.5749		SCML1	4311	94.4173
	PLAUR	1093	95.6494		PLAUR	5212	93.2327		PLAUR	6305	94.441
	GLRX3	814	94.2208		GLRX3	3277	94.7018		GLRX3	4091	94.4613
	BCL6	813	92.2078		BCL6	3364	96.8939		BCL6	4177	94.5508
	RGS1	831	96.4286		RGS1	4108	92.6951		RGS1	4939	94.5618
	TRIM69	766	94.2857		TRIM69	3944	94.8906		TRIM69	4710	94.5881
	RGCC	823	97.5974		RGCC	4064	91.8688		RGCC	4887	94.7331
	GADD45B	915	93.5714		GADD45B	4241	95.9337		GADD45B	5156	94.7526
	SLC7A1	1229	93.6364		SLC7A1	4662	95.8808		SLC7A1	5891	94.7586
	CCL5	914	96.3636		CCL5	5297	93.1815		CCL5	6211	94.7726
	ARNTL	728	90.974		ARNTL	2408	98.6773		ARNTL	3136	94.8257
	RSG1	685	91.5584		RSG1	3408	98.0962		RSG1	4093	94.8273
	C1QB	681	96.9481		C1QB	3538	92.7328		C1QB	4219	94.8404
	ISG20	728	93.1169		ISG20	3061	96.7319		ISG20	3789	94.9244
	ELK4	838	97.5325		ELK4	3946	92.4062		ELK4	4784	94.9693
	TMEM109	953	84.2857		TMEM109	3829	105.672		TMEM109	4782	94.979
	RALB	1369	91.039		RALB	4437	99.0234		RALB	5806	95.0312
	HLA-DRB1	733	91.5584		HLA-DRB1	2552	98.7769		HLA-DRB1	3285	95.1676
	CFH	712	96.039		CFH	3500	94.3071		CFH	4212	95.173
	CTSC	729	94.2208		CTSC	3200	96.3506		CTSC	3929	95.2857
	NR6A1	628	92.7922		NR6A1	2700	98.0112		NR6A1	3328	95.4017
	CLIC4	756	93.961		CLIC4	3443	96.8933		CLIC4	4199	95.4271
	SOCS3	1140	93.8312		SOCS3	4522	97.0461		SOCS3	5662	95.4387
	PPPDE2	858	91.7532		PPPDE2	4014	99.146		PPPDE2	4872	95.4496
	C1QA	656	94.1558		C1QA	3352	96.8697		C1QA	4008	95.5128
	ACVR1B	839	93.0519		ACVR1B	3689	98.1022		ACVR1B	4528	95.5771
	TRIM38	959	97.1429		TRIM38	3655	94.0812		TRIM38	4614	95.612
	SLC2A3	782	97.2078		SLC2A3	3735	94.0319		SLC2A3	4517	95.6199
	SNTB2	824	93.1169		SNTB2	3440	98.1416		SNTB2	4264	95.6293
	SEPT4	905	94.8052		SEPT4	3370	96.4831		SEPT4	4275	95.6441
	SDHA	753	99.3506		SDHA	3959	91.9417		SDHA	4712	95.6462
	LIMK2	885	91.3636		LIMK2	3949	100.168		LIMK2	4834	95.7659
	IRF8	855	95.8442		IRF8	3619	95.7242		IRF8	4474	95.7842
	GABBR1	925	97.987		GABBR1	5123	93.722		GABBR1	6048	95.8545
	SLAMF1	682	95.9091		SLAMF1	4678	95.8864		SLAMF1	5360	95.8978
	RHOBTB3	680	94.8701		RHOBTB3	3752	96.9784		RHOBTB3	4432	95.9243
	B2M	882	98.4416		B2M	3735	93.4408		B2M	4617	95.9412
	HLA-DQB1	981	99.5455		HLA-DQB1	5112	92.3413		HLA-DQB1	6093	95.9434
	XAF1	937	93.961		XAF1	3359	98.0545		XAF1	4296	96.0077
	CASP5	1106	96.4935		CASP5	3903	95.6713		CASP5	5009	96.0824
	NDUFA9	728	99.2208		NDUFA9	3690	92.9752		NDUFA9	4418	96.098
	STC1	793	97.7273		STC1	3644	94.5091		STC1	4437	96.1182
	IFIT2	758	100.195		IFIT2	5063	92.0478		IFIT2	5821	96.1213
	KYNU	801	100.455		KYNU	3981	91.8215		KYNU	4782	96.138
	BTN3A2	1011	97.1429		BTN3A2	4711	95.1574		BTN3A2	5722	96.1501
	MVP	849	92.4026		MVP	4313	99.979		MVP	5162	96.1908
	CASP10	22	87.0779		CASP10	1829	105.334		CASP10	1851	96.2057
	DECR1	958	96.4286		DECR1	4276	95.9864		DECR1	5234	96.2075
	BIRC3	833	83.8312		BIRC3	3689	108.619		BIRC3	4522	96.2251
	RGS3	1198	93.3117		RGS3	3760	99.1648		RGS3	4958	96.2382
	PSTPIP2	817	97.6623		PSTPIP2	3879	94.8287		PSTPIP2	4696	96.2455
	SCO2	638	97.5325		SCO2	2952	95.1204		SCO2	3590	96.3264
	SP140	967	96.1688		SP140	4663	96.5171		SP140	5630	96.343
	FBP1	1241	98.3117		FBP1	4334	94.3999		FBP1	5575	96.3558
	PDIA3	889	95.8442		PDIA3	4505	97.0614		PDIA3	5394	96.4528
	KARS	817	98.8312		KARS	4241	94.1609		KARS	5058	96.4961
	FLT3LG	746	95.3247		FLT3LG	3142	97.7208		FLT3LG	3888	96.5227
	ECGF1	866	102.727		ECGF1	4630	90.3672		ECGF1	5496	96.5472
	NOD2	932	97.1429		NOD2	3520	95.9829		NOD2	4452	96.5629
	TREX1	1157	85.8442		TREX1	3005	107.335		TREX1	4162	96.5896
	INPP1	1050	91.039		INPP1	3766	102.217		INPP1	4816	96.6278
	CD74	896	92.9221		CD74	3532	100.38		CD74	4428	96.6511
	EPB41L4A	809	95.974		EPB41L4A	4823	97.4498		EPB41L4A	5632	96.7119
	FGL2	990	92.8571		FGL2	3410	100.632		FGL2	4400	96.7445
	GLUL	736	91.8182		GLUL	3441	101.753		GLUL	4177	96.7856
	PARP9	748	99.4156		PARP9	4659	94.2452		PARP9	5407	96.8304
	SFT2D2	977	96.2987		SFT2D2	3395	97.4844		SFT2D2	4372	96.8915
	HLA-DRA	692	98.1818		HLA-DRA	3548	95.6108		HLA-DRA	4240	96.8963
	OGFR	620	92.9221		OGFR	2618	100.876		OGFR	3238	96.8993
	SLC25A28	768	91.6883		SLC25A28	3481	102.144		SLC25A28	4249	96.9162
	MTHFD2	833	101.494		MTHFD2	5213	92.345		MTHFD2	6046	96.9192
	CCND1	877	94.8701		CCND1	3546	99.0718		CCND1	4423	96.9709
	STAT2	557	97.4026		STAT2	3055	96.5494		STAT2	3612	96.976
	GALNT6	878	88.8312		GALNT6	2656	105.283		GALNT6	3534	97.057
	SPTLC2	792	96.1039		SPTLC2	3393	98.0997		SPTLC2	4185	97.1018
	IFI35	813	99.6753		IFI35	4148	94.575		IFI35	4961	97.1252
	ARNTL2	1101	92.2727		ARNTL2	4010	101.987		ARNTL2	5111	97.1299
	FPR2	900	101.429		FPR2	4213	92.8912		FPR2	5113	97.1599
	SCYL3	910	93.3766		SCYL3	3376	101.009		SCYL3	4286	97.1928
	GLS	771	98.3117		GLS	3148	96.2148		GLS	3919	97.2632
	RBCK1	780	96.7532		RBCK1	3530	97.8344		RBCK1	4310	97.2938
	C1S	861	99.2857		C1S	3286	95.3438		C1S	4147	97.3148
	SECTM1	1002	99.6753		SECTM1	3746	94.9648		SECTM1	4748	97.3201
	SP110	836	95.5844		SP110	3505	99.1219		SP110	4341	97.3531
	C11orf75	909	103.831		C11orf75	4599	91.0069		C11orf75	5508	97.4191
	SLC7A5	902	96.1039		SLC7A5	3825	98.7594		SLC7A5	4727	97.4317
	PSMA4	734	91.8182		PSMA4	2927	103.132		PSMA4	3661	97.4751
	RALA	787	87.0779		RALA	2573	108.075		RALA	3360	97.5765
	PFKP	778	99.1558		PFKP	5392	96.0776		PFKP	6170	97.6167
	RNF114	1006	100.455		RNF114	3724	94.8668		RNF114	4730	97.6607
	SCPEP1	788	94.6104		SCPEP1	3486	100.749		SCPEP1	4274	97.6795
	RNF24	852	94.3506		RNF24	3316	101.077		RNF24	4168	97.7137
	SLC2A6	806	92.6623		SLC2A6	3025	102.793		SLC2A6	3831	97.7276
	KCTD14	1116	89.8052		KCTD14	2931	105.693		KCTD14	4047	97.749
	FAM107A	771	92.5325		FAM107A	3949	103.024		FAM107A	4720	97.7783
	INHBA	827	98.8961		INHBA	4354	96.7709		INHBA	5181	97.8335
	CALD1	904	100.455		CALD1	4029	95.3313		CALD1	4933	97.8929
	HLA-DOA	749	101.818		HLA-DOA	4434	94.0549		HLA-DOA	5183	97.9366
	SLC25A22	942	94.9351		SLC25A22	3493	100.979		SLC25A22	4435	97.9572
	BATF2	813	100.974		BATF2	3099	94.9898		BATF2	3912	97.9819
	GCNT1	821	95.3896		GCNT1	3536	100.581		GCNT1	4357	97.9852
	APOL6	206	98.7662		APOL6	4368	97.207		APOL6	4574	97.9866
	PLEKHO1	1167	94.1558		PLEKHO1	4082	101.819		PLEKHO1	5249	97.9874
	NUB1	738	102.597		NUB1	4215	93.4172		NUB1	4953	98.0073
	MT1F	915	101.558		MT1F	4340	94.7236		MT1F	5255	98.141
	IRF9	609	102.597		IRF9	3650	93.7113		IRF9	4259	98.1543
	GBP4	901	94.1558		GBP4	3371	102.223		GBP4	4272	98.1892
	IFI6	1078	96.6883		IFI6	4441	99.8454		IFI6	5519	98.2669
	MT2A	1014	96.2987		MT2A	3683	100.257		MT2A	4697	98.2779
	CH25H	827	95.1948		CH25H	4280	101.364		CH25H	5107	98.2795
	KIAA1618	1303	97.4675		KIAA1618	4229	99.1056		KIAA1618	5532	98.2866
	HLA-G	675	99.4805		HLA-G	3834	97.1391		HLA-G	4509	98.3098
	SLC1A5	724	101.948		SLC1A5	3527	94.7534		SLC1A5	4251	98.3507
	VCAM1	694	100.39		VCAM1	4781	96.313		VCAM1	5475	98.3513
	APOBEC3A	740	103.312		APOBEC3A	3116	93.4441		APOBEC3A	3856	98.3779
	PTGS2	643	102.403		PTGS2	4963	94.5301		PTGS2	5606	98.4663
	F3	950	104.74		F3	4749	92.2936		F3	5699	98.517
	PRKAR2B	867	98.3117		PRKAR2B	3384	98.7521		PRKAR2B	4251	98.5319
	P2RX7	827	97.2727		P2RX7	4096	99.8099		P2RX7	4923	98.5413
	TLR2	813	99.6753		TLR2	3489	97.434		TLR2	4302	98.5547
	VAMP5	846	97.4675		VAMP5	3012	99.7405		VAMP5	3858	98.604
	PLEK2	954	97.3377		PLEK2	3539	99.9498		PLEK2	4493	98.6437
	SERPINB9	638	100.974		SERPINB9	3205	96.3207		SERPINB9	3843	98.6474
	C21orf7	788	102.208		C21orf7	4018	95.1179		C21orf7	4806	98.6628
	CD7	975	97.9221		CD7	4138	99.4162		CD7	5113	98.6691
	IFI30	577	102.143		IFI30	3468	95.2242		IFI30	4045	98.6835
	CXCL11	725	98.5714		CXCL11	3053	98.8009		CXCL11	3778	98.6862
	BTN3A1	808	100.584		BTN3A1	4651	96.8536		BTN3A1	5459	98.719
	BATF3	731	97.0779		BATF3	3728	100.366		BATF3	4459	98.722
	ETV7	923	93.8312		ETV7	3084	103.685		ETV7	4007	98.758
	TEAD4	687	97.7922		TEAD4	3366	99.8674		TEAD4	4053	98.8298
	CCL2	720	102.792		CCL2	4107	94.9745		CCL2	4827	98.8834
	AIM2	558	95.6494		AIM2	2588	102.334		AIM2	3146	98.9916
	DLAT	774	104.74		DLAT	4701	93.2534		DLAT	5475	98.9968
	STAT3	954	100.13		STAT3	4187	98.0124		STAT3	5141	99.0711
	GBP1	823	96.6234		GBP1	3623	101.53		GBP1	4446	99.0768
	SLC15A3	1020	94.2857		SLC15A3	3461	103.877		SLC15A3	4481	99.0815
	GBP2	849	92.4675		GBP2	2518	105.697		GBP2	3367	99.0823
	CD40	755	101.039		CD40	3637	97.191		CD40	4392	99.115
	LGMN	846	94.6753		LGMN	3250	103.558		LGMN	4096	99.1168
	STOM	884	96.5584		STOM	3202	101.698		STOM	4086	99.1283
	MCL1	490	95.8442		MCL1	2947	102.43		MCL1	3437	99.1373
	RCN1	717	98.6364		RCN1	3468	99.6469		RCN1	4185	99.1416
	IL15RA	536	94.4805		IL15RA	2821	103.807		IL15RA	3357	99.1439
	CCDC109B	811	94.0909		CCDC109B	2634	104.257		CCDC109B	3445	99.1742
	WDR25	708	97.4675		WDR25	3089	100.918		WDR25	3797	99.1928
	SOD2	940	104.87		SOD2	4952	93.542		SOD2	5892	99.2061
	CCL7	739	104.935		CCL7	3780	93.5819		CCL7	4519	99.2585
	ANXA3	929	94.5455		ANXA3	2326	104.094		ANXA3	3255	99.3196
	C20ORF24	835	96.5584		C20ORF24	3293	102.152		C20ORF24	4128	99.3554
	OPTN	904	102.662		OPTN	3973	96.0517		OPTN	4877	99.357
	GIMAP6	1066	103.052		GIMAP6	4457	95.7971		GIMAP6	5523	99.4245
	DOCK1	676	103.636		DOCK1	4535	95.2234		DOCK1	5211	99.4299
	PLA1A	792	102.857		PLA1A	3948	96.0373		PLA1A	4740	99.4472
	TRIM14	807	92.7922		TRIM14	3383	106.135		TRIM14	4190	99.4634
	OAZ3	778	100.195		OAZ3	3476	98.7526		OAZ3	4254	99.4737
	C1R	555	101.364		C1R	3104	97.6789		C1R	3659	99.5213
	GM2A	945	102.662		GM2A	5075	96.4778		GM2A	6020	99.5701
	FST	663	105.325		FST	3595	93.9023		FST	4258	99.6135
	GBP3	688	105.325		GBP3	3641	93.9507		GBP3	4329	99.6377
	P2RY6	616	95.5195		P2RY6	3523	103.853		P2RY6	4139	99.686
	GK	637	100.26		GK	3129	99.2264		GK	3766	99.7431
	PHF11	623	96.8831		PHF11	3063	102.821		PHF11	3686	99.852
	G3BP2	155	99.4805		G3BP2	4848	100.279		G3BP2	5003	99.88
	ASPHD2	868	94.026		ASPHD2	3116	105.808		ASPHD2	3984	99.9169
	All Fluc	100	100		TRIP.Fluc	2968.37	100		TRIP.Fluc	3068.37	100
	UBE2L6	488	102.078		UBE2L6	3133	97.9327		UBE2L6	3621	100.005
	GBP5	604	94.3506		GBP5	2462	105.674		GBP5	3066	100.012
	LGALS3BP	951	107.597		LGALS3BP	4715	92.4556		LGALS3BP	5666	100.027
	CXCL9	684	97.4026		CXCL9	3218	102.652		CXCL9	3902	100.027
	FAM46A	728	101.299		FAM46A	2562	98.7682		FAM46A	3290	100.033
	FFAR2	526	105.714		FFAR2	4535	94.3889		FFAR2	5061	100.052
	VRK2	606	103.766		VRK2	3779	96.3657		VRK2	4385	100.066
	PARP3	775	94.9351		PARP3	1974	105.221		PARP3	2749	100.078
	SELL	932	102.792		SELL	4515	97.4305		SELL	5447	100.111
	PDGFRA	823	100.584		PDGFRA	4067	99.8469		PDGFRA	4890	100.216
	ST3GAL5	898	95.4545		ST3GAL5	2967	104.991		ST3GAL5	3865	100.223
	IL32	823	106.818		IL32	4388	93.6691		IL32	5211	100.244
	RIPK2	774	101.234		RIPK2	3820	99.2941		RIPK2	4594	100.264
	MTTP	878	95		MTTP	2162	105.707		MTTP	3040	100.353
	MR1	719	105.13		MR1	3892	95.6094		MR1	4611	100.37
	IRF2	1005	97.9221		IRF2	3673	102.899		IRF2	4678	100.411
	SDC3	730	102.143		SDC3	3533	98.6872		SDC3	4263	100.415
	EHD1	891	96.1039		EHD1	3557	104.755		EHD1	4448	100.43
	TNF	845	97.3377		TNF	3421	103.522		TNF	4266	100.43
	SIK1	741	100.779		SIK1	3628	100.12		SIK1	4369	100.45
	TIFA	696	107.532		TIFA	3840	93.4328		TIFA	4536	100.483
	DAPP1	791	99.1558		DAPP1	2381	102.042		DAPP1	3172	100.599
	ZNFX1	522	100.584		ZNFX1	3548	100.639		ZNFX1	4070	100.612
	ITGAL	844	93.5065		ITGAL	1927	107.766		ITGAL	2771	100.636
	ZFP36	655	88.4416		ZFP36	2167	112.917		ZFP36	2822	100.679
	FCGR1B	733	105.325		FCGR1B	4528	96.1987		FCGR1B	5261	100.762
	ACSL5	790	95.7143		ACSL5	3939	105.817		ACSL5	4729	100.766
	OSMR	700	102.532		OSMR	3775	99.0459		OSMR	4475	100.789
	TRIB1	1065	92.1429		TRIB1	2669	109.449		TRIB1	3734	100.796
	CISH	684	104.351		CISH	3974	97.2619		CISH	4658	100.806
	LY96	1004	96.9481		LY96	4002	104.743		LY96	5006	100.846
	SLC6A12	876	102.597		SLC6A12	3931	99.1067		SLC6A12	4807	100.852
	TAP1	679	107.468		TAP1	4487	94.3887		TAP1	5166	100.928
	PTPN1	813	101.104		PTPN1	3598	100.831		PTPN1	4411	100.967
	KIAA0040	698	99.3506		KIAA0040	3401	102.624		KIAA0040	4099	100.987
	NBN	719	98.7662		NBN	3473	103.35		NBN	4192	101.058
	NMI	670	103.442		NMI	3902	98.7199		NMI	4572	101.081
	HAPLN3	649	104.026		HAPLN3	3503	98.1443		HAPLN3	4152	101.085
	CBR3	696	101.299		CBR3	3693	101.004		CBR3	4389	101.152
	CCL22	755	99.1558		CCL22	3265	103.194		CCL22	4020	101.175
	P2RY14	606	107.208		P2RY14	4066	95.2209		P2RY14	4672	101.214
	CTSS	649	105.13		CTSS	3497	97.3268		CTSS	4146	101.228
	NT5E	1082	100		NT5E	3890	102.693		NT5E	4972	101.347
	GIMAP5	802	101.753		GIMAP5	3393	101.044		GIMAP5	4195	101.399
	DYNLT1	909	97.4026		DYNLT1	3335	105.453		DYNLT1	4244	101.428
	IL18BP	693	92.7273		IL18BP	2727	110.316		IL18BP	3420	101.522
	IFIT5	846	100.519		IFIT5	3076	102.529		IFIT5	3922	101.524
	PHLDA2	665	104.026		PHLDA2	4409	99.0687		PHLDA2	5074	101.547
	ITK	610	104.675		ITK	3978	98.5225		ITK	4588	101.599
	PTPN2	807	96.4935		PTPN2	1187	106.717		PTPN2	1994	101.605
	HERC6	527	99.8701		HERC6	2886	103.348		HERC6	3413	101.609
	IFITM3	701	95.5844		IFITM3	2678	107.733		IFITM3	3379	101.659
	CCL8	575	99.7403		CCL8	2935	103.644		CCL8	3510	101.692
	GLRX	727	98.8312		GLRX	2918	104.631		GLRX	3645	101.731
	APOBEC3G	12	80.974		APOBEC3G	1632	122.563		APOBEC3G	1644	101.769
	LY6E	831	93.8961		LY6E	1647	109.658		LY6E	2478	101.777
	NAPA	929	89.8052		NAPA	1892	113.788		NAPA	2821	101.796
	CERS6	820	93.961		CERS6	2962	109.636		CERS6	3782	101.798
	PRPS2	950	98.8961		PRPS2	3628	104.74		PRPS2	4578	101.818
	ATOX1	576	99.6753		ATOX1	4075	104.057		ATOX1	4651	101.866
	SAMD4A	701	103.636		SAMD4A	2883	100.416		SAMD4A	3584	102.026
	CFB	679	107.208		CFB	4371	96.9884		CFB	5050	102.098
	APOL2	585	104.87		APOL2	3142	99.3621		APOL2	3727	102.116
	MYO1B	788	95.5844		MYO1B	2685	108.701		MYO1B	3473	102.142
	ATF5	668	102.403		ATF5	3305	101.925		ATF5	3973	102.164
	Untransduced				Untransduced	2593.33	102.168		Untransduced	2593.33	102.168
	CCL20	734	96.2338		CCL20	2912	108.219		CCL20	3646	102.227
	PMAIP1	667	109.416		PMAIP1	4213	95.1268		PMAIP1	4880	102.271
	STEAP4	658	95.2597		STEAP4	2298	109.474		STEAP4	2956	102.367
	TJP2	591	104.87		TJP2	3961	99.8705		TJP2	4552	102.37
	TAPBP	806	105.195		TAPBP	4314	99.6859		TAPBP	5120	102.44
	UAP1	843	103.182		UAP1	3412	101.732		UAP1	4255	102.457
	ENPP2	1170	94.4805		ENPP2	2801	110.442		ENPP2	3971	102.461
	EPSTI1	670	89.7403		EPSTI1	1730	115.259		EPSTI1	2400	102.499
	IDO1	694	96.8182		IDO1	2644	108.186		IDO1	3338	102.502
	IL15	597	103.247		IL15	3082	101.812		IL15	3679	102.529
	GUCY1A3	715	102.532		GUCY1A3	3424	102.537		GUCY1A3	4139	102.535
	PTPRO	512	99.3506		PTPRO	3469	105.737		PTPRO	3981	102.544
	ISG15	665	97.8571		ISG15	2711	107.34		ISG15	3376	102.599
	POLR3D	827	93.2468		POLR3D	1163	111.994		POLR3D	1990	102.62
	ALAS1	49	115.195		ALAS1	6	90.0705		ALAS1	55	102.633
	PCLO	794	93.5714		PCLO	1452	111.864		PCLO	2246	102.718
	AARS	797	104.805		AARS	3525	100.644		AARS	4322	102.725
	IFI44	997	101.234		IFI44	4029	104.225		IFI44	5026	102.729
	LXN	745	93.0519		LXN	1707	112.515		LXN	2452	102.784
	MT1H	703	94.0909		MT1H	2596	111.495		MT1H	3299	102.793
	HLA-E	682	97.9221		HLA-E	2661	107.746		HLA-E	3343	102.834
	NFIX	584	105.649		NFIX	3759	100.141		NFIX	4343	102.895
	DDX60	326	106.234		DDX60	2920	99.6596		DDX60	3246	102.947
	HLA-DOB	863	108.896		HLA-DOB	4076	97.1128		HLA-DOB	4939	103.004
	HLA-C	871	115.325		HLA-C	5052	90.6962		HLA-C	5923	103.01
	C5orf15	159	107.857		C5orf15	4136	98.2735		C5orf15	4295	103.065
	HLA-DPB1	1060	99.6104		HLA-DPB1	3194	106.567		HLA-DPB1	4254	103.088
	IL12RB1	844	106.948		IL12RB1	4255	99.6455		IL12RB1	5099	103.297
	CUL1	583	101.494		CUL1	1610	105.144		CUL1	2193	103.319
	ERLIN1	758	95.7792		ERLIN1	1914	111.005		ERLIN1	2672	103.392
	DUSP3	830	104.026		DUSP3	3714	102.889		DUSP3	4544	103.457
	SERPINE1	683	99.4156		SERPINE1	2860	107.549		SERPINE1	3543	103.482
	MT1X	628	97.8571		MT1X	2076	109.121		MT1X	2704	103.489
	ASCL2	600	93.961		ASCL2	2817	113.176		ASCL2	3417	103.568
	CD97	638	102.922		CD97	3669	104.343		CD97	4307	103.632
	ASCC3	542	108.442		ASCC3	3975	98.8291		ASCC3	4517	103.635
	CASP7	797	98.5065		CASP7	2323	109.116		CASP7	3120	103.811
	PANX1	994	100.974		PANX1	3883	106.858		PANX1	4877	103.916
	ID4	583	94.4805		ID4	1609	113.41		ID4	2192	103.945
	APOL1	895	97.4675		APOL1	3225	110.505		APOL1	4120	103.986
	BCL2A1	807	105.39		BCL2A1	3684	102.644		BCL2A1	4491	104.017
	CD226	1013	104.545		CD226	3889	103.658		CD226	4902	104.102
	TRIM21	699	104.091		TRIM21	3342	104.174		TRIM21	4041	104.133
	GOLM1	737	102.273		GOLM1	3713	106.007		GOLM1	4450	104.14
	CD274	771	96.3636		CD274	1773	112.05		CD274	2544	104.207
	PLSCR1	677	91.7532		PLSCR1	1585	116.671		PLSCR1	2262	104.212
	UBE2Z	724	101.948		UBE2Z	3296	106.563		UBE2Z	4020	104.256
	C2	537	110.649		C2	3449	97.8837		C2	3986	104.267
	SERPING1	977	98.7662		SERPING1	2877	109.896		SERPING1	3854	104.331
	TMEM140	540	107.792		TMEM140	2500	100.875		TMEM140	3040	104.333
	MYD88	557	106.429		MYD88	3533	102.363		MYD88	4090	104.396
	LGALS9	970	94.9351		LGALS9	2320	113.89		LGALS9	3290	104.413
	HLA-DQA1	814	106.688		HLA-DQA1	3389	102.234		HLA-DQA1	4203	104.461
	MELK	850	112.403		MELK	4302	96.5577		MELK	5152	104.48
	ANKRD22	687	99.0909		ANKRD22	2260	109.983		ANKRD22	2947	104.537
	PSMB9	838	96.4935		PSMB9	3196	112.666		PSMB9	4034	104.58
	BTN3A3	768	107.727		BTN3A3	3820	101.45		BTN3A3	4588	104.589
	CDC25B	839	108.896		CDC25B	4425	100.322		CDC25B	5264	104.609
	PDCD1LG2	715	112.857		PDCD1LG2	4264	96.4685		PDCD1LG2	4979	104.663
	IFI27	596	100.649		IFI27	1806	108.678		IFI27	2402	104.664
	MARCKSL1	196	109.87		MARCKSL1	3648	99.5337		MARCKSL1	3844	104.702
	CD69	724	96.2338		CD69	2378	113.268		CD69	3102	104.751
	FBXO6	841	93.7013		FBXO6	1566	115.931		FBXO6	2407	104.816
	GCH1	717	103.636		GCH1	3354	106.015		GCH1	4071	104.826
	DUSP6	507	94.2857		DUSP6	2863	115.435		DUSP6	3370	104.86
	RHBDF2	835	109.026		RHBDF2	3452	100.747		RHBDF2	4287	104.887
	LMNB1	640	110.13		LMNB1	2835	99.6474		LMNB1	3475	104.889
	PSMA2	477	103.312		PSMA2	3829	106.596		PSMA2	4306	104.954
	CSF2RB	1149	105.519		CSF2RB	4510	104.431		CSF2RB	5659	104.975
	HSD11B1	870	103.961		HSD11B1	3816	106.197		HSD11B1	4686	105.079
	PSAT1	754	90.3247		PSAT1	1715	119.974		PSAT1	2469	105.149
	INADL	522	107.338		INADL	3344	103.251		INADL	3866	105.294
	C16ORF7	852	98.1818		C16ORF7	2671	112.482		C16ORF7	3523	105.332
	EDNRA	1282	91.1688		EDNRA	2232	119.786		EDNRA	3514	105.477
	PSMA3	846	99.9351		PSMA3	2676	111.283		PSMA3	3522	105.609
	IFI44L	496	118.117		IFI44L	3541	93.3109		IFI44L	4037	105.714
	MX2	527	108.636		MX2	39	102.87		MX2	566	105.753
	NADK	898	112.792		NADK	4340	98.9177		NADK	5238	105.855
	OAS3	247	110.325		OAS3	3664	101.404		OAS3	3911	105.864
	IFIT1	817	105.325		IFIT1	3294	106.438		IFIT1	4111	105.881
	DENND1A	648	100.649		DENND1A	1779	111.22		DENND1A	2427	105.935
	HLA-DPA1	1083	101.364		HLA-DPA1	3642	111.865		HLA-DPA1	4725	106.614
	TRIM22	559	111.948		TRIM22	3026	101.59		TRIM22	3585	106.769
	CA11	656	93.2468		CA11	2020	120.333		CA11	2676	106.79
	ADAR	526	103.052		ADAR	1288	110.647		ADAR	1814	106.85
	STAMBPL1	668	105.195		STAMBPL1	2623	109.136		STAMBPL1	3291	107.166
	EDN1	839	107.727		EDN1	3477	106.648		EDN1	4316	107.188
	KLF4	829	105.455		KLF4	2766	108.944		KLF4	3595	107.199
	ICAM1	801	112.857		ICAM1	4208	101.759		ICAM1	5009	107.308
	NAMPT	627	95		NAMPT	1387	119.733		NAMPT	2014	107.366
	TNFAIP3	723	100.909		TNFAIP3	2131	113.912		TNFAIP3	2854	107.411
	DDX58	250	111.234		DDX58	3139	103.737		DDX58	3389	107.485
	CD80	680	94.5455		CD80	1164	120.58		CD80	1844	107.563
	IL1RN	578	104.675		IL1RN	2613	110.467		IL1RN	3191	107.571
	PLEK	807	113.636		PLEK	3779	101.513		PLEK	4586	107.575
	RTP4	612	103.377		RTP4	1891	112.183		RTP4	2503	107.78
	DNASE1L3	689	95.2597		DNASE1L3	2253	120.46		DNASE1L3	2942	107.86
	BST2	622	92.7922		BST2	865	122.962		BST2	1487	107.877
	LAP3	722	97.7273		LAP3	1520	118.068		LAP3	2242	107.898
	PSMB8	546	99.7403		PSMB8	1758	116.067		PSMB8	2304	107.903
	CLEC10A	969	109.545		CLEC10A	3749	106.93		CLEC10A	4718	108.238
	TRAFD1	715	92.6623		TRAFD1	989	124.649		TRAFD1	1704	108.656
	JAK2	586	114.87		JAK2	3287	102.894		JAK2	3873	108.882
	DENND1B	767	114.221		DENND1B	2945	103.658		DENND1B	3712	108.939
	SLAMF7	795	117.208		SLAMF7	4223	100.841		SLAMF7	5018	109.024
	CDKN1A	108	102.727		CDKN1A	1341	115.394		CDKN1A	1449	109.061
	N4BP2L1	914	110.519		N4BP2L1	3693	107.985		N4BP2L1	4607	109.252
	FEM1C	684	88.8312		FEM1C	360	130.286		FEM1C	1044	109.559
	CLIC2	1154	104.091		CLIC2	3797	115.045		CLIC2	4951	109.568
	AKAP7	702	99.3506		AKAP7	3090	120.112		AKAP7	3792	109.731
	CEACAM1	93	108.571		CEACAM1	2692	110.898		CEACAM1	2785	109.735
	TGM2	275	102.208		TGM2	1331	117.381		TGM2	1606	109.794
	IL6	279	113.506		IL6	2547	106.908		IL6	2826	110.207
	NRP2	141	111.623		NRP2	3238	108.84		NRP2	3379	110.232
	TRIB2	784	109.61		TRIB2	3675	111.106		TRIB2	4459	110.358
	ENO2	121	127.403		ENO2	5162	93.3203		ENO2	5283	110.361
	CTSL1	737	108.636		CTSL1	3853	112.727		CTSL1	4590	110.682
	APOL4	581	111.818		APOL4	3068	109.58		APOL4	3649	110.699
	USP6NL	139	114.351		USP6NL	2335	107.243		USP6NL	2474	110.797
	ERAP2	735	108.247		ERAP2	3341	113.497		ERAP2	4076	110.872
	SSPN	476	106.169		SSPN	2071	115.65		SSPN	2547	110.909
	PROCR	627	95.2597		PROCR	1057	126.687		PROCR	1684	110.974
	BACH1	671	123.052		BACH1	2939	98.9026		BACH1	3610	110.977
	IL1B	767	110.26		IL1B	3526	112.837		IL1B	4293	111.548
	C18ORF8	809	100.779		C18ORF8	1220	122.564		C18ORF8	2029	111.672
	PARP8	731	102.143		PARP8	2294	121.328		PARP8	3025	111.735
	SP140L	589	101.558		SP140L	1102	122.132		SP140L	1691	111.845
	IFI16	261	122.273		IFI16	3353	102.174		IFI16	3614	112.223
	KLF10	381	107.857		KLF10	2821	117.967		KLF10	3202	112.912
	CD38	677	98.8961		CD38	985	127.86		CD38	1662	113.378
	IFIT3	581	101.818		IFIT3	241	125.089		IFIT3	822	113.454
	CASP1	177	111.104		CASP1	1456	117.261		CASP1	1633	114.182
	SQRDL	884	111.753		SQRDL	3545	117.029		SQRDL	4429	114.391
	PLA2G4C	844	109.026		PLA2G4C	3216	120.282		PLA2G4C	4060	114.654
	CASP4	457	104.156		CASP4	22	125.764		CASP4	479	114.96
	SNX10	421	105.584		SNX10	1528	124.759		SNX10	1949	115.172
	USP15	897	99.9351		USP15	117	131.064		USP15	1014	115.499
	TXN	385	105.584		TXN	1085	125.56		TXN	1470	115.572
	ALPK1	666	99.8701		ALPK1	102	131.665		ALPK1	768	115.767
	CMAH	810	101.039		CMAH	464	130.729		CMAH	1274	115.884
	BAK1	78	89.7403		BAK1	579	143.435		BAK1	657	116.587
	ASS1	780	99.5455		ASS1	1108	133.745		ASS1	1888	116.645
	TAP2	708	97.987		TAP2	390	135.88		TAP2	1098	116.933
	TNFAIP2	618	99.1558		TNFAIP2	1264	135.051		TNFAIP2	1882	117.103
	PSMB10	156	112.273		PSMB10	760	123.164		PSMB10	916	117.719
	GPR109B	552	104.026		GPR109B	202	131.705		GPR109B	754	117.865
	PDGFA	619	104.091		PDGFA	89	131.806		PDGFA	708	117.949
	XPNPEP1	563	104.221		XPNPEP1	514	131.762		XPNPEP1	1077	117.991
	HCP5	212	104.221		HCP5	317	132.1		HCP5	529	118.16
	OAS1	286	103.182		OAS1	350	136.151		OAS1	636	119.666
	MYOF	347	103.831		MYOF	240	136.125		MYOF	587	119.978
	PARP12	625	103.766		PARP12	44	137.874		PARP12	669	120.82
	RERE	224	122.532		RERE	2081	119.99		RERE	2305	121.261
	CNDP2	420	120.974		CNDP2	2228	122.166		CNDP2	2648	121.57
	UBA7	52	95.1299		UBA7	58	148.675		UBA7	110	121.902
	FAS	111	108.377		FAS	1199	135.698		FAS	1310	122.037
	TLR7	954	100		TLR7	74	144.677		TLR7	1028	122.339
	APOL3	120	112.403		APOL3	141	132.808		APOL3	261	122.605
	CTSO	246	120.325		CTSO	1371	128.835		CTSO	1617	124.58
	OAS2	780	102.403		OAS2	125	151.869		OAS2	905	127.136
	TDRD7	378	104.286		TDRD7	135	150.289		TDRD7	513	127.287
	RNF19B	621	100.13		RNF19B	157	156.325		RNF19B	778	128.227
	DHX58	770	103.636		DHX58	350	161.008		DHX58	1120	132.322
	MX1	645	102.013		MX1	303	164.692		MX1	948	133.352
	IFITM1	360	106.494		IFITM1	251	168.671		IFITM1	611	137.582
	IL7R	188	123.766		IL7R	610	167.868		IL7R	798	145.817
	TLR8	396	99.0909		TLR8	6	193.226		TLR8	402	146.158
	RFTN1	548	107.078		RFTN1	38	185.319		RFTN1	586	146.198
	CTSZ	42	111.429		CTSZ	94	181.398		CTSZ	136	146.413
	LDLR	39	121.883		LDLR	62	197.75		LDLR	101	159.817
