# Supplementary material for: Overexpression screen of interferon-stimulated genes identifies RARRES3 as a restrictor of Toxoplasma gondii infection
Source: eLife. 2021 Dec 6;10:e73137. doi: 10.7554/eLife.73137 (PMC8789288; doi:10.7554/eLife.73137)
Supplement: Supplementary file 2. [file elife-73137-supp2.xlsx]

## Sheet: IRF1 vs Control
Supplementary file 2 List of genes induced by IRF1 ectopic expression or IFNg treatment in A549 cells
Gene symbol	P-value	Fold change
OAS2	8.62903e-07	650.223
IDO1	1.42188e-06	404.737
IFI27	2.90027e-12	234.601
APOL3	4.35214e-05	185.096
GBP4	5.63415e-05	157.34
MX1	1.49286e-17	104.075
CD74	1.48787e-10	79.695
IFI44	1.2868e-12	75.7967
BST2	2.14823e-11	55.1906
IFI6	2.23439e-18	38.2677
ACSL5	4.60089e-12	38.0654
CMPK2	1.50771e-12	36.1252
PLAAT4	2.50037e-12	28.8667
IFIT1	2.78091e-14	28.5921
TNFRSF14	3.6157e-10	28.5545
UBA7	1.33989e-08	26.7523
TNFRSF1B	1.45132e-10	25.4714
PARP10	6.55747e-15	23.1512
TRIM22	4.70409e-14	21.5998
IFIT3	4.51728e-15	20.492
PLEKHA4	5.07283e-10	16.9567
ISG15	1.06046e-17	15.9457
OASL	8.58212e-13	15.7692
APOL1	1.12681e-15	12.6959
HLA-B	5.81382e-18	12.3507
HCP5	1.1941e-07	11.2647
PSMB9	4.43188e-16	11.1377
PLA1A	5.19846e-07	10.8276
IFI16	6.93257e-11	9.7792
IFIH1	3.20153e-15	9.7714
IRF1	6.37928e-19	9.67141
GBP1	9.60971e-15	9.18368
EXOC3L1	4.51533e-08	8.32264
IRF7	3.11019e-13	7.9388
IRF9	4.59975e-13	7.74101
IFIT2	6.44218e-12	7.71045
IFITM3	1.59499e-11	7.58674
SAMD9L	1.9035e-13	7.34314
HELZ2	9.26332e-17	7.23379
BATF2	5.8964e-12	6.95123
LAMP3	1.14454e-05	6.7027
PSMB8	4.00635e-15	5.85468
UBE2L6	1.11608e-15	5.74827
PARP9	3.5411e-14	5.72993
TLR3	8.32998e-12	5.69986
IRF1-AS1	1.20415e-10	5.6836
ISG20	5.30769e-11	5.54222
FLT3LG	2.91188e-07	5.36063
DDX60	7.7604e-13	5.35175
OAS1	3.81526e-14	5.22562
TRIM31	1.95521e-10	5.11642
TIMM23B-AGAP6	0.0113338	5.09032
UBD	9.8603e-06	5.01688
TAPBPL	1.44527e-12	5.00163
HLA-F	2.40883e-11	4.94424
APOL6	8.14984e-16	4.92024
PSMB8-AS1	6.56093e-08	4.41426
IL15RA	2.09486e-11	4.32969
PARP14	7.46605e-14	4.25401
SAMD9	5.35737e-11	4.19738
DTX3L	1.38855e-15	4.13819
DDX58	1.43155e-09	3.99334
HLA-C	9.90844e-16	3.98369
ERAP2	2.73684e-07	3.83952
MDK	1.07982e-05	3.83726
LGALS9	1.39229e-05	3.81766
HERC6	7.56267e-11	3.80897
ACY3	1.44089e-08	3.79487
AC116347.1	1.02622e-06	3.66448
IFI35	3.50398e-12	3.61045
TNFSF10	1.24321e-05	3.60369
REC8	1.39803e-05	3.57598
AL671277.1	2.4497e-06	3.49658
PHACTR1	3.20426e-05	3.48568
H19	1.34891e-05	3.48237
PSMB10	2.7934e-13	3.42394
LGALS3BP	4.5376e-15	3.3998
PRRG4	1.28504e-07	3.39518
HLA-A	2.7387e-14	3.37273
OAS3	2.33518e-14	3.3563
CD38	7.4195e-07	3.31502
TAP2	8.04678e-11	3.21572
CRYBG1	2.94832e-05	3.20621
PSME2P2	6.44739e-09	3.19267
LINC01232	0.000457992	3.18325
SOCS1	4.72666e-05	3.168
CEACAM1	5.9818e-07	3.10458
PARP12	1.01014e-11	3.08064
HERC5	7.18273e-08	3.05727
CFB	3.18884e-07	3.03289
BTN3A3	4.11302e-05	3.01721
CD40	1.12748e-08	2.99138
GBP3	1.15952e-09	2.97939
SAMHD1	3.62713e-11	2.94332
PIK3AP1	2.77968e-06	2.93287
PLSCR1	6.56294e-12	2.91821
IFIT5	1.1554e-10	2.90053
SHFL	5.33979e-11	2.87756
DDX60L	7.24843e-12	2.86445
NLRC5	1.70073e-08	2.84274
AC009093.9	0.000317987	2.76492
ADAP1	1.35343e-06	2.7588
USP18	1.92085e-09	2.75195
B2M	1.2768e-14	2.75186
PLXNC1	7.521e-05	2.7463
TMEM229B	1.20785e-05	2.72396
TRIM34	0.0131268	2.70597
NMI	1.06745e-09	2.70264
APOL2	9.50936e-12	2.69928
MMP14	0.00030343	2.66105
PSME1	1.04667e-13	2.65166
TRANK1	1.01843e-06	2.64552
GLI3	0.00249956	2.63219
AC005324.3	0.0129051	2.59837
SP110	3.40423e-11	2.59587
PSME2	6.8189e-12	2.59024
SP140L	8.94145e-10	2.58159
HLA-H	0.000795807	2.57903
VASH2	6.25801e-07	2.57783
TRIM21	1.67037e-09	2.47448
NR4A3	0.00234763	2.47266
BTN3A1	5.73963e-08	2.4583
ODF3B	4.55653e-06	2.45281
CADPS2	2.04113e-05	2.45031
ASB4	0.00619268	2.42164
SOX7	0.00434296	2.40108
IFI30	7.96238e-10	2.38984
NR4A1	1.40001e-08	2.37315
FP236383.3	7.378e-07	2.28033
TF	0.0250069	2.27967
ASPHD2	7.90779e-05	2.27909
PVRIG2P	0.032977	2.26637
LAP3	1.03295e-11	2.25591
SMG7-AS1	0.00235029	2.2521
CLEC2B	0.0112994	2.24212
AC107081.2	0.0155249	2.24149
CFI	0.000244084	2.24046
TRIM14	1.21925e-11	2.23095
TM4SF5	0.00739392	2.22207
CTSS	9.06666e-10	2.20204
RNF213-AS1	0.00019009	2.19735
TAP1	3.48137e-12	2.1803
APOBEC3F	1.24352e-06	2.16321
PML	1.87938e-10	2.15703
BCO1	1.56294e-06	2.15149
TFF1	0.0325734	2.14826
ERAP1	1.23279e-08	2.13628
H2AC18	0.016041	2.1287
GJD3	2.00366e-06	2.10773
CIITA	0.000744	2.0907
NFIX	1.05827e-10	2.08935
GSDMB	0.0143818	2.08744
AC048338.1	0.00642143	2.07823
LINC01145	0.0042138	2.07261
CXCL12	0.015584	2.04723
ACBD7	0.0012632	2.03716
HK2	0.00484112	2.03486
SP100	1.0088e-09	2.02379
TRIM38	4.69402e-08	2.02251
CHKB-CPT1B	0.00741245	2.01258

## Sheet: IFNg vs Control
Gene symbol	P-value	Fold change
IDO1	4.40274e-08	8712.48
GBP4	1.06315e-06	3194.14
OAS2	3.32933e-07	1456.12
APOL3	1.14354e-05	485.355
UBD	3.32641e-12	236.493
BST2	3.17293e-13	201.69
BATF2	6.64654e-18	147.202
GBP1	2.97793e-19	92.6261
C4B	8.11573e-09	92.4735
TNFRSF1B	1.32545e-12	92.1843
ACSL5	2.55299e-13	86.8655
IFIT3	2.26688e-17	77.6371
HAPLN3	3.49063e-14	74.7779
TNFRSF14	1.18519e-11	74.1923
SOCS1	5.7207e-12	71.8403
CMPK2	1.29686e-13	71.2198
CD74	2.21166e-10	69.9402
TRIM22	6.7367e-16	61.9093
IFI44	2.98479e-12	59.2527
C4A	0.000131126	53.9178
PLAAT4	3.17065e-13	49.396
MX1	2.08983e-16	47.7852
IRF1	2.78387e-22	46.7373
PSMB9	7.71647e-19	41.2724
APOL1	4.87296e-18	40.3441
UBA7	4.31011e-09	36.9505
PARP10	1.00923e-15	35.8446
ICAM1	2.65951e-09	35.3934
EXOC3L1	3.62721e-11	34.8112
APOL6	1.13412e-20	30.5742
IL18BP	2.23071e-17	28.9804
TRIM31	8.61968e-15	27.4324
CD274	3.19573e-11	27.3798
UBE2L6	1.18948e-19	26.3053
SAMD9L	1.59315e-16	26.0191
NLRC5	3.77425e-15	23.1057
LAMP3	4.0124e-08	23.0967
IRF8	3.63594e-09	21.8884
ISG20	1.57627e-14	20.9638
PARP14	1.54437e-18	20.8588
PARP9	1.46149e-17	19.5816
PSMB8-AS1	6.63988e-12	19.2603
CIITA	6.53975e-11	18.3222
WARS1	3.19081e-20	18.207
TAP1	1.81922e-20	18.1139
NNMT	2.45454e-11	18.0828
PLEKHA4	4.78369e-10	17.5518
IFI27	1.98386e-08	17.0403
GBP2	1.49894e-15	16.933
IFIH1	1.52847e-16	16.591
ISG15	8.77682e-18	16.5181
PLA1A	9.14655e-08	16.0551
OASL	7.8247e-13	15.9372
IFI35	6.92257e-17	15.2591
IRF1-AS1	2.6082e-13	14.4986
TCAF2	1.67981e-06	13.87
IFITM3	4.85085e-13	13.3838
IFIT2	2.27894e-13	13.2616
GBP3	6.07811e-15	12.9161
TNFSF10	3.42472e-09	12.6982
DDX60	2.23061e-15	12.2969
DTX3L	4.01893e-19	11.9407
IRF9	3.13626e-14	11.7953
IL15RA	1.37705e-14	11.5647
FLT3LG	2.49468e-09	11.4813
IFIT1	2.68882e-12	11.3792
PSMB8	3.77863e-17	11.3547
IFI16	2.73394e-11	11.3277
LAP3	1.63172e-18	11.0327
RASGRP3	1.15714e-07	10.9097
TAP2	2.83922e-15	10.8926
CD38	9.65514e-11	10.7996
SAMHD1	4.64884e-16	10.5468
APOL2	4.47493e-17	10.0967
PIK3AP1	2.00719e-10	9.84505
C1R	6.78941e-14	9.67375
TLR3	2.02279e-13	9.63866
CTSS	2.86122e-16	9.57371
PRRG4	3.26714e-11	9.53911
IFI6	3.29621e-15	9.12672
SEMA3F	6.20658e-13	9.01063
IGFLR1	6.08602e-14	8.97697
CEACAM1	1.42533e-10	8.70567
PSMB10	8.56021e-17	8.62279
HELZ2	2.67052e-17	8.61106
AC099548.2	3.67308e-08	8.60264
PRRT2	9.85066e-06	8.54988
IFI30	2.18661e-15	8.52324
HLA-E	7.60021e-18	8.09369
RNF213-AS1	2.30806e-09	8.06905
CAND2	2.92296e-09	7.92189
RNF213	8.27999e-17	7.91721
HLA-B	1.18815e-16	7.71688
BTN3A3	4.79353e-08	7.7047
STAT2	2.95229e-12	7.6431
SP110	7.25431e-16	7.53873
NMI	4.77961e-14	7.52844
HCP5	1.36152e-06	7.16377
HLA-F	1.25758e-12	7.14778
C3	5.47295e-13	7.03724
TRIM21	4.10331e-14	6.8917
ASPHD2	2.29546e-09	6.84462
IRF7	9.95412e-13	6.71591
ERAP2	3.18328e-09	6.71004
MMP25-AS1	3.91839e-13	6.62971
RARRES1	3.50122e-07	6.60937
CD40	6.38585e-12	6.55806
AC116347.1	1.0279e-08	6.48594
TAPBPL	1.78948e-13	6.45951
ODF3B	3.82417e-10	6.37189
CRYBG1	8.71453e-08	6.36709
TGM2	4.19215e-15	6.34724
CTSO	4.82151e-08	6.3224
TYMP	2.21049e-15	6.31811
SOCS3	7.59924e-11	6.18613
SEPTIN4	4.89626e-06	6.13269
CFB	4.02682e-10	6.06774
MUC1	1.44528e-10	5.95014
RAB20	3.13314e-10	5.94959
BTN3A1	5.85224e-12	5.86397
PSME2P2	2.72592e-11	5.70727
MMP25	4.50599e-05	5.6807
JAK2	4.95499e-13	5.54624
PHACTR1	8.4058e-07	5.50864
AL139011.2	0.0048749	5.47366
PML	2.26512e-15	5.47043
STAT1	1.2137e-14	5.42725
C1S	7.03076e-10	5.39002
PLSCR1	1.14667e-14	5.27564
CASP4	9.66802e-09	5.15601
SP140L	4.66033e-13	5.073
PARP12	5.77894e-14	4.98893
IFIT5	3.67868e-13	4.96555
TRIM69	2.25186e-11	4.96189
ACY3	1.34469e-09	4.94475
IL32	5.50688e-12	4.91634
GLI3	2.63452e-05	4.90304
CFH	1.01149e-08	4.86746
BATF3	6.42641e-10	4.84192
LINC02577	4.56678e-05	4.81117
CXCL2	6.84089e-07	4.80492
TMEM229B	5.2613e-08	4.80264
B2M	2.6442e-17	4.70122
REC8	1.91937e-06	4.64092
HERC6	1.13201e-11	4.60624
OAS3	8.28662e-16	4.58087
FP236383.3	2.50365e-10	4.5568
PSME2	9.03477e-15	4.51887
ST8SIA4	7.85621e-11	4.5142
ATP10D	3.71901e-10	4.50639
DDX58	5.22597e-10	4.43242
CRYZL2P-SEC16B	1.26491e-06	4.42338
CADPS2	5.12921e-08	4.4192
TRANK1	5.4871e-09	4.39023
TRIM34	0.00270035	4.37045
DDX60L	6.40267e-14	4.33154
GSDMB	0.000273187	4.32633
AGT	3.22599e-05	4.31258
TRAFD1	7.65666e-15	4.29036
VASH2	2.72316e-09	4.28212
SAMD9	4.54945e-11	4.25075
CA13	9.04995e-08	4.16227
MSRB1	1.42178e-14	4.08774
APOBEC3F	4.96189e-10	4.07791
OAS1	5.31117e-13	3.95701
SP100	8.07904e-14	3.94953
SEC16B	9.40817e-07	3.91527
TIMM23B-AGAP6	0.00924309	3.90809
AC083862.1	9.42879e-05	3.86048
PSME1	1.06809e-15	3.81133
ANXA2R	4.25723e-05	3.80244
IRF2	3.35502e-12	3.79469
LGALS3BP	1.47573e-15	3.75369
SHFL	2.73759e-12	3.68712
HLA-C	2.58565e-15	3.64638
AC040162.1	1.13026e-08	3.64026
CISH	4.48814e-07	3.63219
CDK18	8.42905e-07	3.62976
ADAP1	5.39405e-08	3.61817
CLEC2B	0.00025214	3.61803
LGALS9	2.69343e-05	3.61407
RPS6KA5	5.52969e-06	3.58433
ZMYND15	2.31321e-05	3.53166
NAMPT	5.30079e-14	3.50523
DPYD	7.1162e-08	3.48575
MAFF	6.59402e-07	3.48467
LMO7	7.92457e-15	3.46577
ERAP1	1.51901e-11	3.45887
NUB1	8.3992e-15	3.42783
AC008875.3	1.43153e-07	3.39789
KIAA1614	2.38569e-06	3.38355
AC245297.4	9.77498e-06	3.37555
SHISAL1	1.36181e-05	3.34788
CPM	6.16547e-09	3.31561
FBXO6	2.55823e-07	3.29989
MOB3C	1.01994e-08	3.29182
LINC01232	0.000370815	3.28833
AL353807.5	1.35362e-08	3.2806
CHKB-CPT1B	3.05635e-05	3.27101
TRIM38	4.39071e-11	3.24422
ALPK1	7.20234e-09	3.23826
SQOR	2.59413e-10	3.23188
LXN	1.19831e-07	3.2244
ZNFX1	5.57855e-13	3.1991
CXCL12	0.00113131	3.14825
BTN3A2	5.47973e-10	3.1442
NAMPTP1	3.53694e-09	3.13662
CD47	4.91552e-12	3.13092
HLA-H	0.000179461	3.12862
CBR3	8.6447e-09	3.10213
OGFR	2.16919e-13	3.09443
PMAIP1	5.88949e-09	3.08467
CASP7	1.4984e-10	3.08005
CSF1	1.04886e-11	3.06149
CTSL	2.5551e-11	3.05
PRDM1	0.00121278	3.03991
PHF11	2.08858e-07	3.01583
PRKCG	0.000657106	3.00086
BCO1	1.87943e-08	2.98747
USP18	6.75686e-10	2.9711
NCKAP5	0.00122464	2.94568
HLA-A	1.66864e-13	2.92207
IL18R1	2.65776e-05	2.91265
NFIX	6.22551e-13	2.88462
RAB43	1.81028e-08	2.87732
LHX9	0.000202861	2.8733
SOX7	0.00119947	2.87074
AC083862.2	0.00091726	2.86866
NFE2L3	1.28577e-09	2.8409
GJD3	2.85507e-08	2.83236
CACNG6	0.000179819	2.82521
MOV10	1.76149e-12	2.81177
UNC13A	0.00038432	2.80155
PAXIP1-AS2	2.57537e-06	2.79765
ADGRE1	3.05715e-07	2.77545
AL669918.1	5.59724e-06	2.75347
ACTL8	0.000826858	2.7483
XRN1	4.17377e-09	2.74032
AL671277.1	2.39812e-05	2.73938
AC020915.5	3.76342e-05	2.72625
IL22RA1	2.14439e-08	2.71852
GSDMD	1.0831e-11	2.71346
CCL2	4.58031e-06	2.7023
ARID5B	1.68662e-05	2.69408
AC055716.2	0.00114472	2.69281
EFCAB12	0.000340289	2.68623
SIX1	4.5851e-10	2.67122
GPR37	4.04398e-06	2.66295
MT1XP1	0.00132268	2.65078
DNPEP	2.98419e-11	2.63977
PLXNC1	0.00012175	2.63351
RNF19B	7.19314e-11	2.62031
CCDC68	2.96434e-09	2.61425
SEMA3E	1.3183e-05	2.60101
PARP3	1.16782e-10	2.58883
DIO2	0.000423531	2.58796
RAB27A	3.49232e-07	2.58683
SLC25A28	3.51587e-09	2.58232
MT2A	0.000203918	2.57288
LIPT1	0.000787933	2.56211
ATF3	1.346e-07	2.55961
ARNTL2	3.75936e-08	2.55587
MLKL	9.9475e-12	2.55409
RHBDL3	5.64781e-05	2.53881
DRAM1	1.80438e-11	2.53506
SLC2A12	0.00134382	2.5285
CHRM3	0.000532491	2.51925
LINC00623	0.0092386	2.51116
COL27A1	1.14488e-10	2.50988
FAM117B	1.03227e-08	2.50595
CXCL5	1.15154e-05	2.47883
AC018653.3	0.00307212	2.47419
STAT3	5.29222e-14	2.47066
CRISPLD1	0.00159016	2.4646
SLFN11	1.46688e-10	2.46109
DOCK4	9.92587e-08	2.46069
TAPBP	1.69137e-12	2.45413
MAPK8IP2	9.40124e-08	2.44897
CA11	1.97242e-07	2.43916
ENOX1	0.00154745	2.43365
RAB43P1	0.000793726	2.41856
FBLN5	0.000732268	2.41769
WDR25	2.37857e-08	2.41139
OPTN	3.29925e-11	2.40957
MAP3K8	5.7035e-08	2.40723
HDX	0.000500246	2.405
B4GALNT3	0.00643067	2.40231
SOD2	5.83533e-12	2.39746
ABHD16A	1.90974e-09	2.3945
SLC12A7	1.79669e-12	2.39336
AP000295.1	0.000152285	2.3929
ADAR	1.94933e-13	2.39098
MDGA1	2.96011e-08	2.38632
HSBP1L1	6.16912e-08	2.38137
TMCC3	0.00160607	2.37718
LYPD1	0.000201864	2.36391
CLDN23	4.52554e-08	2.36386
FRMD4B	0.000114548	2.36307
SYNE2	2.93064e-09	2.3569
IL15	1.62328e-05	2.33567
TRIM25	1.37949e-11	2.33408
NUCB1	2.16614e-12	2.33082
CFI	0.00018206	2.31938
TBX3	4.56914e-09	2.2966
GSTK1	9.9332e-12	2.29277
SLC25A22	3.51889e-11	2.28039
DENND5A	6.58845e-13	2.27098
PLSCR4	3.45028e-05	2.26714
FAS	3.34653e-07	2.25311
TRIM14	1.06768e-11	2.24902
LINC01145	0.00236061	2.2482
CD14	0.000692758	2.24392
TDRD7	3.57728e-08	2.24146
DCHS1	0.0039305	2.24127
SCML1	2.83286e-08	2.2383
RNF114	2.73467e-12	2.23261
CTRL	0.0136517	2.23137
SFMBT2	5.59937e-07	2.22349
CEP162	0.000149973	2.21625
CBR3-AS1	0.0140363	2.21596
AL669830.2	0.00618184	2.2147
PLD5	1.12732e-06	2.21427
AC097709.1	0.000350859	2.20972
GABARAPL1	2.80293e-06	2.20685
TTLL6	2.65789e-05	2.2026
NT5C3AP1	0.00209882	2.20169
NUDCD1	7.64033e-10	2.19855
C1RL-AS1	1.57549e-06	2.19754
SGPP2	3.26421e-05	2.19346
UNC5A	0.00708677	2.18886
AC073111.4	2.58925e-06	2.18823
AC116366.3	0.00459487	2.18327
NT5C3A	8.09243e-09	2.18085
CALCOCO2	6.39568e-12	2.17913
MITD1	6.54356e-06	2.17469
BACH1	8.13122e-09	2.16458
DYSF	0.00403189	2.16075
EVA1C	4.06324e-07	2.14635
AC005324.3	0.022977	2.13927
GTPBP1	8.46975e-11	2.13742
HEG1	4.80958e-10	2.13313
SNTB2	3.56834e-10	2.12429
FOXP1	2.72354e-09	2.12223
SH3BP2	6.28114e-08	2.11719
NREP	2.75614e-07	2.11363
ADGRF4	1.49259e-06	2.11335
CASP8	1.12627e-10	2.11096
PLPP3	1.55727e-07	2.1098
CLSTN3	3.55424e-07	2.10298
HELB	0.0001318	2.09077
HK1	3.69442e-11	2.09034
KCNJ2	0.00109545	2.08815
EIF2AK2	4.30644e-10	2.08644
RBCK1	8.40567e-13	2.08539
SLC7A2	0.000208424	2.08226
AP000356.3	0.0248318	2.08085
IKZF2	0.0060289	2.08071
ADAMTSL4	8.03059e-05	2.07919
MICU3	0.0102076	2.07098
VPS9D1	1.25033e-05	2.06834
ITPKC	2.64881e-09	2.0676
CREG1	1.85749e-08	2.0669
LIPH	5.37604e-07	2.06023
PSMA4	1.45865e-12	2.05842
AP002414.4	5.02969e-06	2.05551
PPA1	9.49283e-12	2.05223
IFITM2	3.58315e-07	2.05141
ANK2	1.06705e-08	2.04674
CYLD	4.82682e-08	2.04046
PUS3	3.72588e-05	2.03917
MAP2	0.000410286	2.03412
HNF4G	5.69175e-05	2.03062
LY6G5B	0.00761215	2.02939
HK2	0.00592654	2.0292
RNF24	4.72103e-10	2.02717
AL031274.1	0.000151982	2.02394
PDGFRL	2.94506e-05	2.01818
AC092368.3	0.00598982	2.0168
MCUB	4.11074e-07	2.01509
ETV6	1.0162e-08	2.00107
