# Supplementary material for: Overexpression screen of interferon-stimulated genes identifies RARRES3 as a restrictor of Toxoplasma gondii infection
Source: eLife. 2021 Dec 6;10:e73137. doi: 10.7554/eLife.73137 (PMC8789288; doi:10.7554/eLife.73137)
Supplement: Supplementary file 3. [file elife-73137-supp3.xlsx]

## Sheet: Gene List Comparisons
Supplementary file 3 Comparison of genes induced by IRF1 or IFNg with genes in the type II ISG screen library
IFNg Unique	IRF1 Unique	ISG Screen Unique	IRF1 - IFNg Shared Unique from ISG Screen	IFNg - ISG Screen Shared Unique from IRF1	IRF1 - ISG Screen Shared Unique from IFNg	IFNg - IRF1 - ISG Screen Shared
ABHD16A	AC009093.9	ADGRE5	AC005324.3	ADAR		OAS2
AC008875.3	AC048338.1	AIM2	AC116347.1	ARNTL2		IDO1
AC018653.3	AC107081.2	AKAP7	ACY3	ATF3		IFI27
AC020915.5	ACBD7	ALAS1	ADAP1	BACH1		APOL3
AC040162.1	ASB4	ANKRD22	AL671277.1	BATF3		GBP4
AC055716.2	H19	ANXA3	APOBEC3F	BTN3A2		MX1
AC073111.4	H2AC18	APOBEC3A	BCO1	C1R		CD74
AC083862.1	HERC5	APOBEC3G	CADPS2	C1S		IFI44
AC083862.2	MDK	APOL4	CFI	CA11		BST2
AC092368.3	MMP14	ARNTL	CHKB-CPT1B	CALCOCO2		IFI6
AC097709.1	NR4A1	ASCC3	CIITA	CASP4		ACSL5
AC099548.2	NR4A3	ASCL2	CLEC2B	CASP7		PLAAT4
AC116366.3	PVRIG2P	ASS1	CMPK2	CBR3		IFIT1
AC245297.4	SMG7-AS1	ATF5	CRYBG1	CCL2		UBA7
ACTL8	TF	B4GALT5	CXCL12	CD274		TNFRSF1B
ADAMTSL4	TFF1	BAK1	DDX60L	CD47		TRIM22
ADGRE1	TM4SF5	BCL2A1	DTX3L	CFH		IFIT3
ADGRF4		BCL6	ERAP1	CTSL		ISG15
AGT		BIRC3	EXOC3L1	CTSO		APOL1
AL031274.1		BTN2A2	FP236383.3	DRAM1		HCP5
AL139011.2		C1QA	GJD3	FAS		PSMB9
AL353807.5		C1QB	GLI3	FBXO6		PLA1A
AL669830.2		C2	GSDMB	GBP2		IFI16
AL669918.1		C5orf15	HELZ2	HAPLN3		IFIH1
ALPK1		CASP1	HK2	HLA-E		IRF1
ANK2		CASP10	HLA-A	ICAM1		GBP1
ANXA2R		CASP5	HLA-B	IFITM2		IRF7
AP000295.1		CCL22	HLA-H	IL15		IRF9
AP000356.3		CCL5	IRF1-AS1	IL18BP		IFIT2
AP002414.4		CCL7	LINC01145	IL32		IFITM3
ARID5B		CCL8	LINC01232	IRF2		BATF2
ATP10D		CCND1	NFIX	IRF8		LAMP3
B4GALNT3		CCND2	NLRC5	JAK2		PSMB8
C1RL-AS1		CD69	OASL	LXN		UBE2L6
C3		CD7	ODF3B	MCUB		PARP9
C4A		CD80	PARP10	MT2A		ISG20
C4B		CDKN1A	PARP14	MUC1		FLT3LG
CA13		CERS6	PHACTR1	NAMPT		DDX60
CACNG6		CH25H	PIK3AP1	OGFR		OAS1
CAND2		CLEC10A	PLEKHA4	OPTN		TRIM31
CASP8		CLIC2	PLXNC1	PARP3		TAPBPL
CBR3-AS1		CLIC4	PRRG4	PHF11		HLA-F
CCDC68		CMAHP	PSMB8-AS1	PMAIP1		APOL6
CD14		CNDP2	PSME2P2	PPA1		IL15RA
CDK18		CPLANE2	REC8	PSMA4		DDX58
CEP162		CSF2RB	RNF213-AS1	RBCK1		HLA-C
CHRM3		CTSC	SAMD9	RNF114		ERAP2
CISH		CTSZ	SAMD9L	RNF19B		LGALS9
CLDN23		CUL1	SOX7	RNF213		HERC6
CLSTN3		CX3CL1	TIMM23B-AGAP6	RNF24		IFI35
COL27A1		CXCL10	TLR3	SCML1		TNFSF10
CPM		CXCL11	TMEM229B	SEPTIN4		PSMB10
CREG1		CXCL9	TNFRSF14	SLC25A22		LGALS3BP
CRISPLD1		DAPP1	TRANK1	SLC25A28		OAS3
CRYZL2P-SEC16B		DECR1	TRIM34	SNTB2		CD38
CSF1		DENND1A	UBD	SOCS3		TAP2
CTRL		DENND1B	VASH2	SOD2		SOCS1
CXCL2		DESI1		SQOR		CEACAM1
CXCL5		DHX58		STAT1		PARP12
CYLD		DLAT		STAT2		CFB
DCHS1		DNASE1L3		STAT3		BTN3A3
DENND5A		DUSP3		TAPBP		CD40
DIO2		DUSP5		TDRD7		GBP3
DNPEP		DYNLT1		TGM2		SAMHD1
DOCK4		EDEM1		TRAFD1		PLSCR1
DPYD		EDN1		TYMP		IFIT5
DYSF		EDNRA		VPS9D1		SHFL
EFCAB12		ENPP2		WARS1		USP18
EIF2AK2		EPB41L4A		WDR25		B2M
ENOX1		EPSTI1		ZNFX1		NMI
ETV6		ETV7				APOL2
EVA1C		FAM107A				PSME1
FAM117B		FBP1				SP110
FBLN5		FCGR1A				PSME2
FOXP1		FCGR1B				SP140L
FRMD4B		FEM1C				TRIM21
GABARAPL1		FFAR2				BTN3A1
GPR37		FGL2				IFI30
GSDMD		FPR1				ASPHD2
GSTK1		FPR2				LAP3
GTPBP1		FST				TRIM14
HDX		FZD5				CTSS
HEG1		G3BP2				TAP1
HELB		GABBR1				PML
HK1		GADD45B				SP100
HNF4G		GALNT6				TRIM38
HSBP1L1		GBP5
IGFLR1		GCH1
IKZF2		GCNT1
IL18R1		GIMAP4
IL22RA1		GIMAP5
ITPKC		GIMAP6
KCNJ2		GK
KIAA1614		GLRX
LHX9		GLS
LINC00623		GLUL
LINC02577		GM2A
LIPH		GOLM1
LIPT1		GUCY1A1
LMO7		HCAR2
LY6G5B		HCAR3
LYPD1		HLA-DMA
MAFF		HLA-DMB
MAP2		HLA-DOA
MAP3K8		HLA-DOB
MAPK8IP2		HLA-DPA1
MDGA1		HLA-DPB1
MICU3		HLA-DQA1
MITD1		HLA-DQB1
MLKL		HLA-DRA
MMP25		HLA-DRB1
MMP25-AS1		HLA-DRB3
MOB3C		HLA-G
MOV10		HSD11B1
MSRB1		ID4
MT1XP1		IFI44L
NAMPTP1		IFITM1
NCKAP5		IKBKE
NFE2L3		IL10RA
NNMT		IL12RB1
NREP		IL1B
NT5C3A		IL1RN
NT5C3AP1		IL6
NUB1		IL7R
NUCB1		INPP1
NUDCD1		ITGAL
PAXIP1-AS2		ITGB7
PDGFRL		ITK
PLD5		KARS1
PLPP3		KCTD14
PLSCR4		KIAA0040
PRDM1		KLF4
PRKCG		KYNU
PRRT2		LCP2
PUS3		LGMN
RAB20		LIMK2
RAB27A		LMNB1
RAB43		LY6E
RAB43P1		MAP3K7CL
RARRES1		MARCKSL1
RASGRP3		MCL1
RHBDL3		MICB
RPS6KA5		MR1
SEC16B		MT1F
SEMA3E		MT1G
SEMA3F		MT1H
SFMBT2		MT1X
SGPP2		MTHFD2
SH3BP2		MTTP
SHISAL1		MVP
SIX1		MX2
SLC12A7		MYD88
SLC2A12		MYOF
SLC7A2		N4BP2L1
SLFN11		NADK
ST8SIA4		NBN
SYNE2		NEMP1
TBX3		NOD2
TCAF2		NT5E
TMCC3		OAZ3
TRIM25		P2RX7
TRIM69		P2RY13
TTLL6		P2RY14
UNC13A		PAK1
UNC5A		PANX1
XRN1		PARP11
ZMYND15		PARP8
		PCLO
		PCYT1A
		PDCD1LG2
		PDGFA
		PFKP
		PHLDA2
		PIM1
		PLA2G4C
		PLAUR
		PLEK
		PLEK2
		PLEKHO1
		POLR3D
		PRKAR2B
		PROCR
		PRPS2
		PSAT1
		PSMA2
		PSTPIP2
		PTGS2
		PTPN1
		PTPN2
		RAB5IF
		RALA
		RALB
		RCN1
		RERE
		RFX5
		RGCC
		RGS1
		RGS3
		RHBDF2
		RHOBTB3
		RIPK2
		RMC1
		RSAD2
		RTP4
		SAMD4A
		SCO2
		SCPEP1
		SCYL3
		SECTM1
		SELL
		SERPINB9
		SERPING1
		SFT2D2
		SIK1
		SLAMF1
		SLAMF7
		SLAMF8
		SLC15A3
		SLC1A5
		SLC2A3
		SLC2A6
		SLC31A2
		SLC37A1
		SLC6A12
		SLC7A5
		SMCO4
		SNX10
		SP140
		SPTLC2
		ST3GAL5
		STEAP4
		STOM
		STX11
		TBX21
		TEAD4
		TENT5A
		TJP2
		TLR2
		TLR7
		TLR8
		TMEM109
		TMEM140
		TNF
		TNFAIP2
		TNFAIP3
		TNFAIP6
		TNFSF13B
		TREX1
		TRIB1
		TRIM5
		UBE2Z
		USP15
		USP6NL
		VAMP5
		VCAM1
		VRK2
		XAF1
		XPNPEP1
		ZFP36

## Sheet: Gene List Comparisons Top 100
IFNg Unique	IRF1 Unique	ISG Screen Unique	IRF1 - IFNg Shared Unique from ISG Screen	IFNg - ISG Screen Shared Unique from IRF1	IRF1 - ISG Screen Shared Unique from IFNg	IFNg - IRF1 - ISG Screen Shared
AC099548.2	AC116347.1	ADAR	CMPK2	APOL2	CD40	OAS2
C3	ACY3	ADGRE5	DTX3L	C1R	CFB	IDO1
C4A	AL671277.1	AIM2	EXOC3L1	CD274	DDX58	IFI27
C4B	CRYBG1	AKAP7	HELZ2	CTSS	ERAP2	APOL3
CAND2	DDX60L	ALAS1	HLA-B	GBP2	HERC6	GBP4
CIITA	H19	ANKRD22	IRF1-AS1	HAPLN3	HLA-C	MX1
IGFLR1	HERC5	ANXA3	NLRC5	HLA-E	IFIT5	CD74
NNMT	HLA-A	APOBEC3A	OASL	ICAM1	IRF7	IFI44
PRRT2	LINC01232	APOBEC3G	PARP10	IFI30	LGALS3BP	BST2
RASGRP3	MDK	APOL4	PARP14	IL18BP	LGALS9	IFI6
RNF213-AS1	PHACTR1	ARNTL	PIK3AP1	IRF8	OAS1	ACSL5
SEMA3F	PSME2P2	ARNTL2	PLEKHA4	LAP3	OAS3	PLAAT4
TCAF2	REC8	ASCC3	PRRG4	NMI	PARP12	IFIT1
	SAMD9	ASCL2	PSMB8-AS1	RNF213	PLSCR1	UBA7
	TIMM23B-AGAP6	ASPHD2	SAMD9L	SP110	SHFL	TNFRSF1B
		ASS1	TLR3	STAT2	TAPBPL	TRIM22
		ATF3	TNFRSF14	TAP1		IFIT3
		ATF5	UBD	WARS1		ISG15
		B2M				APOL1
		B4GALT5				HCP5
		BACH1				PSMB9
		BAK1				PLA1A
		BATF3				IFI16
		BCL2A1				IFIH1
		BCL6				IRF1
		BIRC3				GBP1
		BTN2A2				IRF9
		BTN3A1				IFIT2
		BTN3A2				IFITM3
		C1QA				BATF2
		C1QB				LAMP3
		C1S				PSMB8
		C2				UBE2L6
		C5orf15				PARP9
		CA11				ISG20
		CALCOCO2				FLT3LG
		CASP1				DDX60
		CASP10				TRIM31
		CASP4				HLA-F
		CASP5				APOL6
		CASP7				IL15RA
		CBR3				IFI35
		CCL2				TNFSF10
		CCL22				PSMB10
		CCL5				CD38
		CCL7				TAP2
		CCL8				SOCS1
		CCND1				CEACAM1
		CCND2				BTN3A3
		CD47				GBP3
		CD69				SAMHD1
		CD7
		CD80
		CDKN1A
		CERS6
		CFH
		CH25H
		CLEC10A
		CLIC2
		CLIC4
		CMAHP
		CNDP2
		CPLANE2
		CSF2RB
		CTSC
		CTSL
		CTSO
		CTSZ
		CUL1
		CX3CL1
		CXCL10
		CXCL11
		CXCL9
		DAPP1
		DECR1
		DENND1A
		DENND1B
		DESI1
		DHX58
		DLAT
		DNASE1L3
		DRAM1
		DUSP3
		DUSP5
		DYNLT1
		EDEM1
		EDN1
		EDNRA
		ENPP2
		EPB41L4A
		EPSTI1
		ETV7
		FAM107A
		FAS
		FBP1
		FBXO6
		FCGR1A
		FCGR1B
		FEM1C
		FFAR2
		FGL2
		FPR1
		FPR2
		FST
		FZD5
		G3BP2
		GABBR1
		GADD45B
		GALNT6
		GBP5
		GCH1
		GCNT1
		GIMAP4
		GIMAP5
		GIMAP6
		GK
		GLRX
		GLS
		GLUL
		GM2A
		GOLM1
		GUCY1A1
		HCAR2
		HCAR3
		HLA-DMA
		HLA-DMB
		HLA-DOA
		HLA-DOB
		HLA-DPA1
		HLA-DPB1
		HLA-DQA1
		HLA-DQB1
		HLA-DRA
		HLA-DRB1
		HLA-DRB3
		HLA-G
		HSD11B1
		ID4
		IFI44L
		IFITM1
		IFITM2
		IKBKE
		IL10RA
		IL12RB1
		IL15
		IL1B
		IL1RN
		IL32
		IL6
		IL7R
		INPP1
		IRF2
		ITGAL
		ITGB7
		ITK
		JAK2
		KARS1
		KCTD14
		KIAA0040
		KLF4
		KYNU
		LCP2
		LGMN
		LIMK2
		LMNB1
		LXN
		LY6E
		MAP3K7CL
		MARCKSL1
		MCL1
		MCUB
		MICB
		MR1
		MT1F
		MT1G
		MT1H
		MT1X
		MT2A
		MTHFD2
		MTTP
		MUC1
		MVP
		MX2
		MYD88
		MYOF
		N4BP2L1
		NADK
		NAMPT
		NBN
		NEMP1
		NOD2
		NT5E
		OAZ3
		OGFR
		OPTN
		P2RX7
		P2RY13
		P2RY14
		PAK1
		PANX1
		PARP11
		PARP3
		PARP8
		PCLO
		PCYT1A
		PDCD1LG2
		PDGFA
		PFKP
		PHF11
		PHLDA2
		PIM1
		PLA2G4C
		PLAUR
		PLEK
		PLEK2
		PLEKHO1
		PMAIP1
		PML
		POLR3D
		PPA1
		PRKAR2B
		PROCR
		PRPS2
		PSAT1
		PSMA2
		PSMA4
		PSME1
		PSME2
		PSTPIP2
		PTGS2
		PTPN1
		PTPN2
		RAB5IF
		RALA
		RALB
		RBCK1
		RCN1
		RERE
		RFX5
		RGCC
		RGS1
		RGS3
		RHBDF2
		RHOBTB3
		RIPK2
		RMC1
		RNF114
		RNF19B
		RNF24
		RSAD2
		RTP4
		SAMD4A
		SCML1
		SCO2
		SCPEP1
		SCYL3
		SECTM1
		SELL
		SEPTIN4
		SERPINB9
		SERPING1
		SFT2D2
		SIK1
		SLAMF1
		SLAMF7
		SLAMF8
		SLC15A3
		SLC1A5
		SLC25A22
		SLC25A28
		SLC2A3
		SLC2A6
		SLC31A2
		SLC37A1
		SLC6A12
		SLC7A5
		SMCO4
		SNTB2
		SNX10
		SOCS3
		SOD2
		SP100
		SP140
		SP140L
		SPTLC2
		SQOR
		ST3GAL5
		STAT1
		STAT3
		STEAP4
		STOM
		STX11
		TAPBP
		TBX21
		TDRD7
		TEAD4
		TENT5A
		TGM2
		TJP2
		TLR2
		TLR7
		TLR8
		TMEM109
		TMEM140
		TNF
		TNFAIP2
		TNFAIP3
		TNFAIP6
		TNFSF13B
		TRAFD1
		TREX1
		TRIB1
		TRIM14
		TRIM21
		TRIM38
		TRIM5
		TYMP
		UBE2Z
		USP15
		USP18
		USP6NL
		VAMP5
		VCAM1
		VPS9D1
		VRK2
		WDR25
		XAF1
		XPNPEP1
		ZFP36
		ZNFX1
